# Supplementary material for: A network-based framework for reanalysing public transcriptome data to identify key genes involved in water deficit response in sugarcane (Saccharum spp.)
Source: Research Square preprint supplement (doi:10.21203/rs.3.rs-7303185/v1), 2025-08-20
Supplement: Supplementary file 2 [file afe495775bd2fcc972aede0f.xlsx]

## Sheet: S1
Supplementary Table S1. Metadata from all the projects (PRJNA882367, PRJEB41560, PRJNA684430, PRJNA628529, PRJNA937025, PRJNA885747, PRJNA854329, PRJNA776107, PRJNA598295, PRJNA590595, PRJNA590281, PRJNA427493, PRJNA419791, PRJNA549834, PRJNA182108, PRJNA975299) analyzed in the present study.
ID	Archive	Name	Title	Description	Responsible	Date	Type	Runs	Library Selection	Platform	Tissue	DEGs	UP	DOWN
PRJEB41560	EBI	RNA-Seq of sugarcane hybrid cultivars roots for drought tolerance	Gene expression in roots of sugarcane hybrid cultivars exposed to drought stress and regular irrigation	We sequenced the root transcriptome (mRNA) of six sugarcane hybrid cultivars (RB867515, RB92579, SP79-1011, RB855113, RB855536, SP80-3280). The roots were exposed to two treatments: regular irrigation (control) and, drought stress. After five days of water deprivation in drought stressed treatment, we individually sampled roots from three biological replications of each combination between treatm…	ESALQ/USP (ID: NA)	2021-06-24	RNA-Seq (PAIRED)	36	CDNA	ILLUMINA (Illumina HiSeq 2500)	Root	682	257	425
PRJNA182108	NCBI	Differential sRNA regulation in leaves and roots of sugarcane under water depletion	Differential sRNA regulation in leaves and roots of sugarcane under water depletion	In order to increase our understanding on the epigenetic regulation in response to abiotic stresses in plants, sRNA regulation in sugarcane plants submitted to drought stress was analyzed. Deep sequencing analysis was carried out to identify the sRNA regulated in leaves and roots of sugarcane cultivars with different drought sensitivities. An enrichment of 22-nt sRNA species was observed in leaf …	Universidade Federal do Rio de Janeiro (ID: SUB1232365-gse42483)	2012-11-23	RNA-Seq (SINGLE)	10	SIZE FRACTIONATION	ILLUMINA (Illumina Genome Analyzer IIx)	Leaf/Root	63	11	52
PRJNA419791	NCBI	NA	Transcriptome sequencing of Sugarcane (Narenga porphyrocoma) leaves in response to drought stress	Narenga porphyrocoma is a wild type of sugarcane that is tolerant to drought stress. To understand the genes in response to drought stress, we employed transcriptome sequencing to profile gene expression profiles of water-deficit sugarcane plants and controls.	La Trobe University (ID: SUB3256602-bp0)	2017-11-25	RNA-Seq (NA)	8	OLIGO-DT	ILLUMINA (Illumina HiSeq 2000)	Leaf	13727	7123	6604
PRJNA427493	NCBI	Saccharum hybrid cultivar	Saccharum hybrid cultivar Transcriptome or Gene expression	Sugarcane Transcriptome sequencing was based on the different leaf level, different drought and different diseases	Guangxi university (ID: SUB3396941-bp0)	2017-12-25	RNA-Seq (PAIRED)	16	RT-PCR	ILLUMINA (Illumina HiSeq 2500)	Leaf	19957	10003	9954
PRJNA549834	NCBI	Saccharum spontaneum	Saccharum spontaneum Transcriptome or Gene expression	Transcriptome analysis of Saccharum spontaneum 87-16 in response to cold stress and drought stress	Guangxi Academy of Agricultural Sciences (ID: SUB5853426-bp0)	2019-06-20	RNA-Seq (SINGLE)	24	OLIGO-DT	ILLUMINA (Illumina Genome Analyzer II)	leaf	5712	3031	2681
PRJNA590281	NCBI	NA	Drought-induced transcriptomic changes in three modern sugarcane cultivars grown in China	Sugarcane is an important industrial crop and is widely cultivated worldwide for sugar and biofuel production. Modern sugarcane, a polyploid interspecific hybrid species, was originally produced by crossing Saccharum officinarum and S. spontaneum and it is relatively tolerant to many biotic and abiotic stresses Among the diverse abiotic stresses, drought greatly reduces sugar yield and biomass ac…	Sugarcane Research Institute, Guangxi Academy of Agricultural Sciences (ID: SUB6566287-bp0)	2019-11-18	RNA-Seq (PAIRED)	81	RT-PCR	ILLUMINA (Illumina HiSeq 2500)	leaf	19653	8995	10658
PRJNA590595	NCBI	Saccharum officinarum	Saccharum officinarum genome sequencing	Transcriptome analysis in two sugarcane genotypes under drought stress	Sugarcane Breeding Institute (ID: SUB6578352-bp0)	2019-11-20	RNA-Seq (PAIRED)	10	RT-PCR	ILLUMINA (Illumina Genome Analyzer II)	Leaf	14656	6018	8638
PRJNA598295	NCBI	NA	Comparative transcriptome analysis of transgenic sugarcane lines with the wild type under drought stress.	Our study comprehends the transcriptomic analysis of three transgenic sugarcane lines, S3, S4, and S5. These lines manifested the SoP5CS genes customary activity in the absence of humidity after those were transformed transgenically. The performance evaluation of these lines in fields with low water availability was our objective. Deciphering the potentiality of drought-tolerant sugarcane lines d…	Guangxi University (ID: SUB6746982-bp0)	2019-12-31	RNA-Seq (PAIRED)	24	CDNA	ILLUMINA (HiSeq X Ten)	leaf	13604	6631	6973
PRJNA628529	NCBI	NA	Transcriptomic response of Sugarcane SP80-3280 at drought condition	Investigation of transcriptomic response at leave and root of Sugarcane SP80-3280 submitted to drought conditions	Institute of Chemistry - University of Sao Paulo (ID: SUB7328253-bp0)	2020-04-26	RNA-Seq (PAIRED)	24	OLIGO-DT	ILLUMINA (Illumina HiSeq 4000)	Leaf/Root	22975	8901	14074
PRJNA684430	NCBI	NA	Saccharum spontaneum transcriptome sequencing	RNA-seq was utilized for global transcriptome profiling of Saccharum spontaneum GXS87-16 under severe drought and re-watering conditions	Guangxi Academy of Agricultural Sciences (ID: SUB8702845-bp0)	2020-12-11	RNA-Seq (SINGLE)	9	PCR	ILLUMINA (Illumina HiSeq 2000)	Leaf	5712	3031	2681
PRJNA776107	NCBI	Saccharum officinarum	Saccharum officinarum Transcriptome or Gene expression	Sugarcane drought transcriptome	Fujian Agriculture and Forestry University (ID: SUB10570645-bp0)	2021-10-29	RNA-Seq (PAIRED)	30	PCR	ILLUMINA (Illumina HiSeq 2500)	leaf	18799	10042	8757
PRJNA854329	NCBI	Saccharum fulvum	Erianthus fulvus Genome sequencing and assembly	Erianthus fulvus (chromosome, 2n=20) is a near-source wild species of sugarcane that has the advantages of early maturation, high sugar content, and drought resistance that is of great value to the genetic improvements of sugarcane varieties. we assembled the E.fulvus genome (901.9 Mb), annotated 27,165 protein-coding genes in 10 chromosomes, performed resequencing of 202 Saccharinae samples, ann…	Yunnan Agricultural University (ID: SUB11727470-bp0)	2022-06-30	NA (NA)	17	NA	NA (NA)	Leaf	12849	3829	9020
PRJNA882367	NCBI	Saccharum hybrid cultivar	Saccharum hybrid cultivar Raw sequence reads	Leaf transcriptome (RNA-Seq) of drought-tolerant ('IACSP94-2094') and -sensitive ('IACPS97-7065') sugarcane genotypes under a 21-day water deficit regime in the greenhouse.	University of Sao Paulo (ID: SUB12083512-bp0)	2022-09-20	RNA-Seq (PAIRED)	4	RT-PCR	ILLUMINA (Illumina HiSeq 2000)	Leaf +1	5909	2283	3626
PRJNA885747	NCBI	NA	Transcriptome data of sugarcane root	Molecular mechanism of Streptomyces contributing to sugarcane drought resistance	Yulin Normal University (ID: SUB12112373-bp0)	2022-09-30	RNA-Seq (PAIRED)	12	OLIGO-DT	ILLUMINA (Illumina NovaSeq 6000)	Root	19555	11365	8190
PRJNA937025	NCBI	NA	Comparative morphoanatomical and transcriptome profiling to unravel the drought adaptive anatomical plasticity and key molecular signalling pathways in shoot borne root system of sugarcane	Whole transcriptome of sugarcane shoot borne roots	ICAR SUGARCANE BREEDING INSTITUTE (ID: SUB12887169-bp0)	2023-02-21	RNA-Seq (PAIRED)	11	PCR	ILLUMINA (Illumina HiSeq 1500)	Root	10822	4381	6441
PRJNA975299	NCBI	NA	Comparative transcriptomic analyses of two sugarcane Saccharum officinarum cultivars differing in drought tolerance	Sugarcane is an important economic crop. Drought has a great impact on its agricultural production. In order to study the drought resistance mechanism of sugarcane, the transcriptomes of two cultivars with different drought resistance under different degree of water shortage were compared.	Guangxi Academy of Agricultural Sciences (ID: SUB13419174-bp0)	2023-05-23	RNA-Seq (PAIRED)	36	OLIGO-DT	BGISEQ (BGISEQ-500)	leaf	36219	17634	18585

## Sheet: S2
Supplementary Table S2. Individual results of differential expression analysis expressed in Log2 Fold-Change from each of the 16 projects from the present study.
compgg	PRJEB41560	PRJNA182108	PRJNA419791	PRJNA427493	PRJNA549834	PRJNA590281	PRJNA590595	PRJNA598295	PRJNA628529	PRJNA684430	PRJNA776107	PRJNA854329	PRJNA882367	PRJNA885747	PRJNA937025	PRJNA975299
comp100005_c0_seq1	-0.19676	NA	0.9777	0.22132	0.43425	1.82997	-1.96531	-0.13225	1.72457	0.43425	0.01832	-0.31778	-0.39512	1.23354	0.64538	-1.14626
comp1000200_c0_seq1	0.0536	NA	NA	0.24647	-0.82534	-0.85151	1.56441	-0.2737	0.06099	-0.82534	0.8474	-1.47805	-0.8087	0.74766	-1.78914	-0.05256
comp100025_c0_seq1	-0.35483	1.63592	-1.33507	1.27446	-1.08726	-0.3709	-1.41852	0.98786	0.72707	-1.08726	-0.30142	NA	-1.49163	1.70067	-2.20816	4.33451
comp100027_c0_seq1	0.01945	1.10053	1.25844	2.08769	-0.41165	2.1064	-1.62903	-0.1665	1.17645	-0.41165	-0.03673	2.49567	0.43902	1.3313	0.43186	-0.89311
comp1000368_c0_seq1	-0.32866	1.63592	0.58407	2.4392	0.29843	-1.64155	NA	-3.62265	0.71601	0.29843	-0.01122	NA	NA	-0.78736	-4.41056	-0.33363
comp1000400_c0_seq1	0.27891	NA	NA	0.09725	-0.97207	-0.68237	-0.61167	NA	0.80779	-0.97207	0.95055	-3.79946	NA	NA	NA	1.37346
comp1000420_c0_seq1	-0.04169	0.0889	-1.33337	0.36981	-0.33711	-2.86226	NA	NA	NA	-0.33711	0.95052	NA	NA	NA	NA	2.58877
comp1000428_c0_seq1	-0.51296	NA	-0.2938	5.21175	0.2112	2.80927	-0.61166	-0.47678	2.36682	0.2112	0.02466	NA	2.75184	-3.33975	NA	-2.26512
comp10005_c0_seq1	-0.36417	NA	-0.2938	0.09725	NA	-0.04131	NA	NA	-0.15399	NA	NA	NA	NA	NA	NA	-0.33349
comp1000540_c0_seq1	-0.29442	NA	-0.16623	-1.46741	NA	0.22554	-2.75954	-0.92025	-2.50716	NA	-0.14553	NA	NA	2.72597	-1.27055	0.90444
comp100067_c0_seq1	-0.06338	2.7747	NA	5.04017	0.00435	0.75971	-1.73045	-0.65036	-0.62243	0.00435	2.26063	NA	0.63963	-0.42126	1.90606	-1.4157
comp100074_c0_seq1	-0.20886	0.56593	-1.22404	-2.09834	NA	-0.29155	NA	-0.17223	-1.65006	NA	-0.47988	NA	-0.4212	0.62618	-4.23786	-0.71283
comp100082_c0_seq1	-0.2079	0.56593	1.74397	0.43228	0.07794	0.67097	-2.80689	0.58071	0.29598	0.07794	0.16109	-0.45735	0.65069	1.44934	0.23488	0.41749
comp1000997_c0_seq1	0.11907	NA	1.46225	-5.77008	0.96615	0.61043	-9.16607	0.9103	1.33899	0.96615	2.76786	-5.40177	-1.56864	7.14849	0.20812	-2.21406
comp1001037_c0_seq1	1.47974	NA	NA	NA	NA	2.18387	NA	NA	NA	NA	-1.43908	NA	NA	2.09951	NA	-0.3337
comp100117_c0_seq1	-0.04698	0.56593	-0.92437	-0.26392	-0.47058	0.31119	-1.01665	-0.46849	0.41363	-0.47058	0.07808	0.35159	0.60256	0.33511	-1.07506	-1.00896
comp1001462_c0_seq1	0.27891	NA	NA	0.09725	NA	-0.04118	-0.61168	NA	NA	NA	NA	NA	NA	NA	1.44363	-3.83425
comp1001495_c0_seq1	0.26724	NA	NA	NA	NA	-0.62247	NA	NA	-0.48542	NA	NA	NA	NA	NA	-6.49703	-0.33348
comp100156_c0_seq1	0.70856	NA	0.37746	3.14635	-0.29573	-2.15276	-6.46048	-1.92271	-1.43672	-0.29573	2.76387	-0.73325	-0.35258	5.34137	-0.93644	0.2778
comp100160_c0_seq1	-0.36417	NA	-1.16118	1.6973	-1.62278	-0.0412	-6.31304	1.07676	-2.34011	-1.62278	3.07075	0.67986	-0.25772	NA	NA	-0.33344
comp1001727_c0_seq1	NA	NA	-0.14456	0.81482	NA	-0.0412	-0.61169	3.26884	-0.70684	NA	1.02349	-0.71448	2.299	NA	NA	NA
comp1001728_c0_seq1	0.93367	NA	1.00869	-0.84185	0.85787	-0.26742	-2.7709	0.04612	0.62796	0.85787	-0.8087	-5.28707	0.19082	-0.51388	2.69953	0.4457
comp100173_c0_seq1	-0.37194	0.11085	-1.18108	0.12934	0.04726	0.68468	-0.61168	2.25588	-2.02318	0.04726	1.00602	-2.53715	3.12975	NA	NA	-1.64674
comp1001807_c0_seq1	-0.16826	NA	2.0337	0.09725	-0.32942	0.68545	-4.07837	0.47302	0.19719	-0.32942	-0.37892	-0.76703	2.299	-1.64703	NA	-0.43912
comp1002002_c0_seq1	0.38073	NA	-0.02896	1.26663	0.35086	-1.15898	-6.08777	0.21387	-0.079	0.35086	-0.16106	-0.41985	1.80932	-1.07686	-0.2941	-1.66296
comp1002128_c0_seq1	-0.00395	NA	1.58215	0.95536	-0.95741	1.19058	-0.61166	-0.00368	-0.56355	-0.95741	-1.91578	NA	-2.54623	1.92558	-0.68431	-3.26624
comp10022_c0_seq1	-0.43394	NA	0.80957	3.41446	0.00436	1.21312	NA	1.72891	-1.92422	0.00436	1.69396	NA	2.03834	NA	-1.285	-3.1815
comp1002201_c0_seq1	-0.39209	0.85938	0.63829	-0.05285	0.96615	2.64219	-0.61172	0.42576	1.17893	0.96615	-0.94264	NA	0.73982	0.74563	NA	-6.33499
comp1002347_c0_seq1	-0.88802	1.63592	-0.2938	NA	0.33894	-1.39182	NA	-1.83568	-0.15399	0.33894	-0.01127	NA	1.00449	5.01395	-4.55394	NA
comp100275_c0_seq1	-0.11189	NA	0.32506	-1.77238	-0.44305	0.29747	0.06987	0.03995	-0.63155	-0.44305	0.57302	NA	0.97684	0.9316	-0.14122	0.66098
comp1002821_c0_seq1	-0.36228	NA	NA	NA	NA	-0.04122	NA	NA	NA	NA	0.02119	NA	NA	1.5788	NA	-0.33346
comp1002917_c0_seq1	0.02804	NA	NA	-2.01036	0.91327	2.80604	NA	-0.66839	-1.15143	0.91327	0.09438	NA	-0.57919	1.83509	-0.87548	1.43718
comp100330_c0_seq1	-1.04564	1.13299	-0.29266	2.62819	-0.9574	-0.04116	-0.61167	-0.24744	1.83319	-0.9574	NA	NA	0.03564	-2.93195	NA	-0.33365
comp1003312_c0_seq1	-0.74888	NA	2.61941	1.95512	-1.297	0.74336	-2.14121	0.22158	1.14954	-1.297	0.01061	-1.05392	-1.58019	0.84207	1.60324	-1.78982
comp1003324_c0_seq1	-0.00032	0.55507	-0.85218	-4.27729	0.99113	1.52283	-0.54635	0.59468	-0.12835	0.99113	-0.39803	1.9376	0.65778	-0.51144	0.03688	-2.23188
comp10034_c0_seq1	0.36403	-0.42722	-1.22473	0.96564	NA	-0.95482	2.83092	0.95308	0.71983	NA	0.15093	1.83451	NA	-1.43983	0.98183	-1.87067
comp100342_c0_seq1	-0.36301	1.61051	0.31704	0.303	-0.59481	-0.06948	0.68552	1.45505	-2.59	-0.59481	-0.6153	0.28048	3.11616	-5.3549	-2.4818	-1.34465
comp100343_c0_seq1	NA	NA	NA	NA	NA	NA	NA	NA	NA	NA	NA	NA	NA	NA	NA	NA
comp100346_c0_seq1	0.0325	NA	0.2351	-0.22652	-0.31986	0.58667	-1.62269	-0.08295	-1.36464	-0.31986	-0.58348	1.17778	-0.86545	-0.43702	0.352	0.42287
comp100349_c0_seq1	-0.04345	NA	-0.29367	-0.33996	NA	-1.05577	-0.61167	NA	NA	NA	NA	NA	0.29159	0.18644	NA	-0.33364
comp10035_c0_seq1	0.30708	NA	-1.1583	1.82635	0.19092	1.43197	NA	0.11058	0.06653	0.19092	2.00317	3.47986	-2.54623	0.17751	-0.6723	-0.33138
comp10036_c0_seq1	NA	NA	NA	2.66094	NA	NA	NA	NA	NA	NA	-0.97296	-3.79946	NA	NA	NA	NA
comp1003627_c0_seq1	0.6873	NA	1.65612	-0.63558	-0.04878	0.48255	-0.61173	-0.08471	0.07792	-0.04878	-0.09511	0.92677	3.03169	-0.45678	-0.8117	2.44221
comp100385_c0_seq1	-0.36228	NA	1.50061	4.78144	0.09368	1.70008	-4.77523	-0.89624	0.81686	0.09368	1.34366	-4.26943	1.99998	NA	1.44363	-4.1967
comp100407_c0_seq1	NA	NA	NA	NA	NA	-0.56594	5.83094	-1.36432	NA	NA	0.95055	NA	NA	NA	2.17924	-0.4291
comp1004070_c0_seq1	-0.12128	1.63592	0.68121	-0.21647	NA	-2.07746	1.95209	-0.44561	-0.15993	NA	-1.76304	-0.41732	-0.31853	-0.83832	-0.1156	1.731
comp1004199_c0_seq1	-0.36828	NA	2.18685	-0.63523	0.96615	-0.04126	-7.37988	1.29523	NA	0.96615	-1.92462	NA	0.58238	2.81098	0.4986	-0.33349
comp1004204_c0_seq1	-0.18427	0.24942	0.63829	1.91513	-0.00103	0.49223	-0.61174	0.24657	-1.08086	-0.00103	0.37772	NA	0.03564	-1.62907	NA	-6.2101
comp100422_c0_seq1	0.6015	NA	2.19279	3.71722	-0.14775	-0.69668	-0.43985	-1.24607	-0.59393	-0.14775	0.279	0.15843	0.13573	2.49761	1.17822	-1.907
comp100428_c0_seq1	NA	1.61051	-2.29507	-3.50808	0.96615	NA	NA	1.51811	-0.72462	0.96615	0.93009	NA	1.61064	NA	NA	NA
comp100429_c0_seq1	0.21123	0.08618	-1.06042	-0.05773	0.0151	0.51406	-4.03234	1.08698	-2.94308	0.0151	0.24497	-2.13233	0.46701	0.77201	-0.16697	0.12149
comp1004394_c0_seq1	-0.14688	0.55507	2.38194	2.66097	0.00438	-2.0675	0.66778	1.1093	-1.15193	0.00438	2.23368	2.62586	-1.40232	-1.21172	0.29913	-0.48554
comp10044_c0_seq1	-0.24121	NA	NA	-0.74054	0.35626	-0.26761	-2.75958	1.03061	-1.23934	0.35626	-0.55717	-2.64602	3.03169	-1.12576	1.44363	0.28598
comp100469_c0_seq1	-0.36228	-0.34437	NA	4.93672	0.02881	1.37186	-0.61178	0.61829	NA	0.02881	-0.788	NA	2.59861	-1.93961	-2.15071	4.91413
comp1004727_c0_seq1	-0.36228	NA	-0.71398	-0.20897	0.00437	-2.39801	-4.3218	-0.18083	-3.27071	0.00437	1.20108	NA	2.299	NA	NA	0.90776
comp1004747_c0_seq1	-0.32198	1.14298	NA	-5.64507	NA	0.81996	-1.88415	0.00151	1.10629	NA	1.03224	NA	-0.54313	0.42257	2.37241	0.76857
comp1004948_c0_seq1	0.74218	NA	NA	NA	NA	NA	NA	NA	-0.27396	NA	NA	NA	NA	NA	NA	NA
comp1005028_c0_seq1	NA	NA	NA	NA	NA	-0.04122	-3.35941	0.52064	-1.71284	NA	-0.973	NA	NA	NA	NA	NA
comp1005162_c0_seq1	-1.32944	0.55507	NA	2.42639	1.81881	-1.81139	0.61812	-1.76023	0.04884	1.81881	0.07895	NA	3.03169	1.87434	-0.09481	1.70872
comp1005494_c0_seq1	0.0234	NA	-1.10601	3.49555	-2.47673	-1.42215	-2.36489	0.17498	0.6763	-2.47673	0.23183	-6.16602	-5.01431	-1.93961	NA	-2.59242
comp1005946_c0_seq1	-0.36554	NA	-0.45017	1.41086	-0.56974	0.99631	0.08312	-0.12718	1.21939	-0.56974	0.44946	0.689	4.02805	-1.26485	2.94442	-0.62309
comp10061_c0_seq1	-0.03718	1.63592	-1.0901	3.41446	NA	1.38324	-0.61167	-1.34234	-2.05561	NA	0.95055	NA	NA	NA	NA	-6.01817
comp100614_c0_seq1	-1.00544	NA	-0.76951	-2.50134	-1.79464	4.11569	-0.61165	-0.5744	2.75397	-1.79464	-0.01128	NA	NA	4.04409	NA	-5.35839
comp1006190_c0_seq1	0.59738	NA	-0.77363	-1.10446	0.24041	-2.82351	-4.08551	0.83835	0.12217	0.24041	2.68287	-2.17276	3.30478	0.05681	-0.07908	1.3686
comp1006237_c0_seq1	-0.24133	NA	1.89447	1.44202	-0.43057	1.16184	-2.7596	-0.4326	-1.23291	-0.43057	0.36647	NA	-2.89252	-1.36442	-3.88581	1.62826
comp1006243_c0_seq1	NA	-0.93412	1.58215	1.43301	0.28971	NA	-8.01172	NA	NA	0.28971	3.05008	NA	2.9801	NA	NA	NA
comp1006318_c0_seq1	-0.04169	NA	0.35831	-4.77101	-1.43899	-0.04113	-3.35941	-1.37603	1.33392	-1.43899	-0.12367	NA	0.75915	NA	NA	-0.33357
comp100652_c0_seq1	-0.68819	NA	0.63577	-0.3962	NA	0.35595	-0.61169	0.04302	-0.50342	NA	NA	NA	-0.47252	-4.66306	1.04077	2.48438
comp100679_c0_seq1	NA	NA	NA	NA	NA	-0.84096	NA	0.15906	NA	NA	-0.28755	NA	NA	NA	-2.37206	2.67453
comp1006935_c0_seq1	-0.36228	NA	NA	0.09724	-1.03042	-2.92485	NA	NA	-0.15399	-1.03042	-0.01126	NA	2.03834	NA	NA	1.42094
comp1006942_c0_seq1	-0.3565	NA	0.84461	-1.91906	-0.52977	0.49743	-0.61167	0.52632	-0.73918	-0.52977	-1.92202	1.25065	-0.91905	-1.16482	2.37241	-0.41107
comp10070_c0_seq1	NA	NA	NA	NA	NA	-0.04124	NA	NA	NA	NA	NA	-3.79946	-0.96759	NA	NA	-0.33355
comp10072_c0_seq1	-0.4906	NA	1.71369	0.43423	-0.11967	0.36892	-1.68777	0.01687	1.23069	-0.11967	0.31085	-3.8469	0.24881	3.61882	-0.86983	0.55229
comp1007374_c0_seq1	0.21283	NA	0.18568	0.71699	0.9786	0.13578	NA	-0.08067	-1.24486	0.9786	1.33672	1.85817	2.03834	1.44128	0.32694	2.43305
comp100754_c0_seq1	0.00637	NA	-0.38993	-1.92968	0.72556	4.45964	-2.68102	0.50512	3.01291	0.72556	-1.83881	-2.02092	-0.29865	2.04405	2.10029	-3.34302
comp100761_c0_seq1	-1.60058	1.87707	NA	NA	0.2166	3.12933	-0.61166	NA	-0.22595	0.2166	NA	NA	NA	NA	4.17668	-8.70595
comp1007618_c0_seq1	0.63078	NA	NA	-0.88893	NA	-1.02481	-0.88005	-0.40175	-2.24259	NA	-0.07976	0.01606	1.03516	-0.72121	-0.46663	-3.79113
comp1007857_c0_seq1	0.26784	NA	1.55561	-3.35137	-0.27571	-0.09399	-3.74506	0.01668	-0.02542	-0.27571	0.19739	-0.42319	0.56982	0.30499	0.56705	-1.76904
comp1007892_c0_seq1	1.60248	NA	1.46859	1.9225	-0.95741	0.36337	-0.6117	0.29643	-0.68085	-0.95741	-0.46055	NA	1.05871	-5.45082	NA	0.30829
comp1008244_c0_seq1	0.30503	NA	-0.3946	2.45875	NA	1.12681	-0.61173	NA	-0.16878	NA	0.32515	NA	-0.95805	-3.99592	-0.61816	-2.53111
comp1008324_c0_seq1	0.61328	NA	1.83882	0.60437	-0.61198	-0.93221	-5.36745	-0.89624	1.48049	-0.61198	-0.04123	NA	-2.76837	5.75773	-1.51537	1.49394
comp100850_c0_seq1	0.00863	NA	NA	4.7794	0.00438	6.79237	-6.34679	-0.50586	NA	0.00438	2.11228	NA	0.12467	0.43954	-7.25777	-5.16156
comp1008531_c0_seq1	2.18988	NA	NA	3.5447	-1.19205	-0.14165	-0.61169	0.12092	-0.60703	-1.19205	0.45694	NA	3.17408	-0.31873	-3.45604	-0.80606
comp100868_c0_seq1	NA	NA	NA	NA	NA	NA	NA	NA	NA	NA	NA	NA	NA	NA	NA	NA
comp1008755_c0_seq1	-1.96421	0.51895	1.58215	NA	-1.43927	1.65856	NA	NA	0.11247	-1.43927	1.94742	NA	NA	2.38531	-4.81482	2.73699
comp1008924_c0_seq1	-0.43814	0.56593	1.03565	-1.03372	-1.96568	-0.20773	0.32599	-0.45567	-0.02222	-1.96568	1.15105	-4.91427	-0.77185	-0.97422	-0.63205	0.21462
comp1008957_c0_seq1	0.96996	0.41067	-0.17129	NA	-0.90311	-0.0576	NA	NA	-0.15453	-0.90311	NA	NA	NA	NA	NA	-0.33343
comp100905_c0_seq1	0.01269	1.749	0.63829	-1.3011	-0.16317	1.3387	-0.13046	-0.18573	-0.89985	-0.16317	0.73047	0.12077	-0.14767	0.19215	-0.21275	-1.02523
comp100919_c0_seq1	-0.01022	NA	NA	NA	NA	-8.41566	-1.50407	NA	NA	NA	NA	NA	-0.09972	-6.77811	2.48431	-6.85739
comp100934_c0_seq1	0.16813	1.87707	0.4982	-0.50711	1.4878	0.43888	-0.49248	-1.11038	0.9167	1.4878	-0.38753	-4.20626	-1.81273	3.40109	0.48834	0.11629
comp1009367_c0_seq1	0.44459	NA	-2.37218	0.10468	-0.30235	-0.56906	-1.02032	1.66918	-0.51382	-0.30235	1.01539	NA	-1.86677	1.71315	-1.08626	-0.58181
comp100950_c0_seq1	-0.72934	0.56593	NA	-1.36979	0.66241	-0.0412	NA	NA	4.06442	0.66241	-1.62763	NA	NA	-0.20361	NA	-0.33344
comp100957_c0_seq1	-0.08131	NA	0.5168	-1.84329	-0.9574	0.7063	2.61388	-0.61434	-0.11393	-0.9574	-0.33876	-6.04165	-0.21003	-2.84915	-0.02751	1.21464
comp100968_c0_seq1	-0.13325	0.55507	3.1174	-1.28783	-0.80442	1.88227	-6.13117	0.52404	2.02039	-0.80442	-1.95947	-10.0973	-1.68416	-1.38858	0.51859	-1.65975
comp100980_c0_seq1	0.29655	NA	1.61741	0.37163	NA	2.95221	NA	0.54644	-1.45989	NA	NA	NA	NA	NA	NA	-0.33358
comp1009803_c0_seq1	0.87096	NA	-1.18592	1.93988	2.48547	2.74633	-0.61165	0.48723	2.39936	2.48547	-0.1446	-1.37305	2.03834	1.40288	NA	-0.33368
comp1009822_c0_seq1	0.12946	NA	-0.5405	-0.25176	-0.25959	-1.98625	5.6383	-0.1385	-2.74646	-0.25959	0.8214	-0.31096	-0.69463	1.01684	0.12749	1.36549
comp1010_c0_seq1	0.01623	NA	0.06143	-2.48622	-0.95741	0.96411	2.83087	0.10025	-0.20155	-0.95741	-1.17141	-7.17143	2.03834	0.51824	-1.66738	-5.48728
comp10100_c1_seq1	0.39881	NA	-1.74106	2.66093	0.96615	-5.79409	4.6645	-0.89624	-2.31093	0.96615	-0.97299	1.38133	-2.54623	3.25773	-0.65523	7.11118
comp101002_c0_seq1	0.08732	1.61051	-0.62602	-0.45243	-0.57282	2.15109	-3.35948	0.32069	NA	-0.57282	1.06751	1.07392	-0.23732	-1.73342	-3.08764	-1.2407
comp101017_c0_seq1	-0.2369	-0.09371	-0.26945	-0.05127	0.11228	-0.96812	-1.93737	-0.86726	-2.60709	0.11228	NA	-4.75864	NA	-3.61279	-2.86387	2.92838
comp1010188_c0_seq1	0.50195	NA	1.87997	2.4206	NA	0.64758	-0.50104	0.63334	0.18275	NA	-3.61392	-7.84133	NA	2.26562	-1.83298	-0.40965
comp10102_c0_seq1	-0.35627	NA	1.16359	-2.50137	0.00436	2.93739	-2.75957	-0.27205	0.15621	0.00436	-0.33147	-3.79946	-1.22338	-3.09132	0.63156	-0.33361
comp1010432_c0_seq1	0.05131	NA	-1.59471	NA	0.00438	-1.06155	-3.35213	-0.04392	-0.30371	0.00438	2.50927	NA	3.89176	-3.50197	NA	-2.28189
comp101049_c0_seq1	0.31537	NA	-0.0898	-0.15604	0.57545	-0.51108	NA	-0.38676	-0.02224	0.57545	0.01502	NA	-0.85951	-2.70128	NA	0.51336
comp10105_c0_seq1	0.27891	NA	NA	4.4813	NA	1.25243	NA	-0.74986	1.33392	NA	-0.75504	NA	NA	NA	-3.82086	-0.33346
comp101066_c0_seq1	-0.39422	NA	-1.22473	-1.01012	0.46419	8.79393	-0.61169	1.3876	3.87842	0.46419	-4.09047	-8.32728	-1.69559	-2.5102	-3.42372	-7.21898
comp1010710_c0_seq1	0.02022	1.61051	0.55806	2.50601	-2.40578	0.58073	-0.61169	-0.11322	-0.30807	-2.40578	-0.4035	0.25374	3.17408	-0.83451	1.15635	0.7118
comp101086_c0_seq1	0.39183	NA	NA	NA	NA	NA	-6.38378	NA	NA	NA	NA	NA	2.842	NA	2.96282	NA
comp101119_c0_seq1	-0.22515	NA	NA	-0.34077	NA	0.08963	-0.54356	-1.06298	-0.93486	NA	0.64347	-0.96425	-1.39255	1.5245	0.7236	0.558
comp101120_c0_seq1	-1.55187	NA	NA	NA	-0.9574	NA	NA	NA	NA	-0.9574	NA	NA	NA	NA	NA	NA
comp1011210_c0_seq1	-0.36228	NA	1.29355	NA	NA	-1.25356	NA	NA	NA	NA	NA	NA	NA	-1.93961	1.42049	3.00267
comp1011274_c0_seq1	0.53075	1.63592	0.56628	0.16847	0.86274	0.84519	-4.08357	-0.44128	-0.23438	0.86274	-0.68431	-0.75413	-0.27866	-1.24995	1.44363	2.43031
comp1011439_c0_seq1	0.72281	NA	1.77323	0.24085	0.20866	-2.67475	-0.92901	0.91019	0.35397	0.20866	-0.11681	-3.51769	2.03834	-1.0836	0.10897	-0.89175
comp1011487_c0_seq1	0.89897	NA	1.43585	-0.51322	-0.2684	7.47795	-0.61178	-3.15418	2.91076	-0.2684	-3.96811	-5.75155	-5.02844	1.5788	6.8712	-8.35259
comp1011497_c0_seq1	NA	NA	NA	NA	NA	NA	NA	NA	NA	NA	NA	NA	NA	NA	NA	NA
comp10115_c1_seq1	-1.03426	0.12072	-0.37597	NA	-0.31508	-0.24605	NA	NA	0.81553	-0.31508	NA	NA	NA	NA	NA	-0.33343
comp101153_c0_seq1	-0.08157	NA	0.57263	-0.55839	0.01923	4.46978	-0.2507	0.39863	1.6887	0.01923	-1.67841	-3.11549	1.29861	0.07226	0.34368	-3.28537
comp1011598_c0_seq1	0.78807	-0.02422	NA	4.93903	-0.95741	0.78189	-0.61168	NA	-1.13899	-0.95741	-0.27375	NA	1.42116	-0.02805	NA	-6.19013
comp1011827_c0_seq1	-0.34347	NA	-1.10924	NA	1.88049	-0.95048	NA	NA	-1.44878	1.88049	-1.80399	NA	-0.91198	-0.71579	NA	2.41876
comp101188_c0_seq1	-0.36228	0.11352	1.58215	5.47161	0.96615	0.07492	-4.9472	-0.33203	NA	0.96615	0.11507	0.75448	0.49738	-6.3704	NA	-0.33355
comp1011948_c0_seq1	0.12586	1.61051	0.33549	0.47512	0.95438	0.07044	-2.75954	0.14724	-1.19832	0.95438	0.21892	NA	3.03169	-1.58603	2.15108	-0.03059
comp10120_c0_seq1	-0.71159	0.56593	-0.29373	0.24344	0.83959	-1.36853	-0.61173	-0.51485	-0.22595	0.83959	0.3051	-1.07023	1.42224	1.5788	NA	3.70387
comp101207_c0_seq1	-0.97575	NA	0.63829	0.09725	0.02894	1.25849	NA	1.02734	1.67027	0.02894	-0.4703	-2.91212	-0.50704	NA	NA	-0.36441
comp101216_c0_seq1	0.23374	NA	1.80234	-5.13149	0.00435	6.72744	-4.55563	-1.73554	0.70043	0.00435	-1.23429	NA	-4.15041	1.5788	3.87634	-7.55503
comp1012164_c0_seq1	0.27891	0.56593	NA	0.71448	NA	2.25935	-0.61165	-0.05767	-0.70684	NA	-0.01122	NA	3.03169	-1.82401	NA	-3.21426
comp1012344_c0_seq1	-0.68483	NA	-1.22473	3.66629	-0.95741	NA	NA	-0.41534	NA	-0.95741	3.82841	NA	NA	NA	NA	NA
comp1012465_c0_seq1	-0.07894	NA	NA	1.18406	0.63534	0.16131	0.69897	-1.76348	0.86221	0.63534	-0.42511	NA	-1.55438	NA	0.48184	-2.52955
comp10125_c0_seq1	-0.20466	NA	NA	-1.13325	NA	0.59166	-0.61167	NA	-0.15399	NA	2.25577	NA	NA	1.07669	NA	0.7305
comp1012528_c0_seq1	0.86957	NA	0.06603	-0.43364	-0.43092	-1.00689	0.0954	-0.41236	-0.00165	-0.43092	0.10676	1.40993	4.02805	-1.03081	0.35916	-0.3726
comp10130_c0_seq1	NA	NA	NA	NA	0.00436	-0.04123	NA	NA	-0.26999	0.00436	-0.01125	NA	NA	NA	NA	-6.02095
comp10131_c0_seq1	-1.85061	NA	0.96382	4.1717	-0.9574	1.20446	-2.75966	1.58756	-0.50666	-0.9574	-0.76111	NA	-2.54623	-2.24154	NA	0.02145
comp1013177_c0_seq1	0.27891	NA	-1.07889	0.28466	0.00436	-2.70042	NA	-0.36755	-0.11225	0.00436	-0.91881	3.13432	0.02775	NA	-1.48764	1.15722
comp1013373_c0_seq1	NA	NA	NA	NA	NA	NA	NA	NA	NA	NA	NA	NA	NA	NA	NA	NA
comp10134_c0_seq1	0.07094	1.63592	-0.64816	0.94447	-1.27356	0.85385	0.68199	-0.5327	0.71079	-1.27356	-0.91635	NA	-0.23291	-0.4995	1.00435	-2.93535
comp1013413_c0_seq1	NA	NA	-1.29839	NA	NA	1.35027	NA	NA	NA	NA	2.31302	NA	NA	NA	-0.6723	NA
comp1013492_c0_seq1	NA	NA	NA	NA	NA	NA	NA	NA	NA	NA	NA	NA	NA	NA	NA	NA
comp10136_c0_seq1	-0.04169	NA	0.5168	-0.34367	NA	1.20311	NA	0.69161	NA	NA	NA	NA	3.71276	-3.02802	NA	1.85573
comp101460_c0_seq1	0.02642	NA	0.47214	-2.50134	-1.87289	-1.71462	-6.31501	1.29698	-0.15399	-1.87289	3.1679	-5.28707	-0.61174	-0.72357	3.04717	0.54762
comp101487_c0_seq1	NA	1.11139	1.72833	3.58258	1.43782	-0.04125	-2.49822	NA	NA	1.43782	5.8419	NA	NA	NA	NA	NA
comp10149_c0_seq1	1.09187	NA	2.77346	0.17244	1.88878	0.35806	-2.75954	-0.38878	1.47888	1.88878	1.19497	NA	-4.7289	2.6456	0.48184	-2.32456
comp10151_c0_seq1	-0.2428	0.55507	0.2069	1.70735	0.42503	-0.6807	-2.75954	2.33792	-0.45958	0.42503	0.39578	0.37847	2.299	2.01005	-0.96881	0.47615
comp10151_c1_seq1	1.39777	NA	0.95599	0.1056	0.28029	0.02065	-0.61173	1.00323	-0.2677	0.28029	-1.19011	-4.84439	NA	-0.26316	2.86839	-0.0206
comp101510_c0_seq1	-0.42178	NA	0.73425	0.85854	0.14707	1.11356	-1.48624	-0.43395	1.38097	0.14707	-0.79705	-0.2719	-1.56561	-0.19305	0.97141	-2.91156
comp1015210_c0_seq1	NA	NA	NA	-0.40646	0.96615	-1.66708	-1.48031	-0.20715	-0.15399	0.96615	1.47418	0.37847	-0.65491	NA	NA	3.81318
comp1015446_c0_seq1	0.83502	-0.15559	NA	NA	NA	1.20575	NA	NA	0.54677	NA	1.75812	NA	-0.23291	0.76023	NA	-0.33362
comp10155_c0_seq1	-0.39309	1.63592	NA	3.66632	NA	1.83187	-2.81839	0.97287	-0.45142	NA	-0.44069	NA	NA	-0.15461	-1.285	3.89635
comp1015575_c0_seq1	0.15824	NA	-0.48212	0.30903	0.96614	-0.4875	0.49907	-0.0179	0.22981	0.96614	-0.94866	NA	-3.05193	4.44083	-1.64404	-1.4397
comp10156_c1_seq1	-1.50352	1.85499	1.17266	1.37699	2.86874	-0.68724	-0.61175	-0.0205	-0.53262	2.86874	1.02834	NA	NA	NA	1.44363	2.36909
comp1015605_c0_seq1	-0.02032	-0.5396	NA	NA	0.00437	1.13648	-0.61166	NA	-0.99842	0.00437	NA	NA	-2.54623	NA	NA	-6.27959
comp1015609_c0_seq1	0.0648	NA	-0.85422	2.4246	0.50513	-1.15473	-0.21169	NA	-1.35049	0.50513	1.31652	-2.41383	NA	0.62782	-3.22809	1.1916
comp101566_c0_seq1	1.65137	0.56593	NA	-0.90683	-1.26255	0.81981	NA	0.41127	-0.15399	-1.26255	1.16892	NA	2.03834	-2.44928	1.99421	0.38357
comp101570_c0_seq1	-0.46053	0.20063	-0.2938	0.2481	-0.17966	1.72306	NA	0.06555	-0.15399	-0.17966	-0.92008	-3.79946	1.02846	-6.33426	NA	1.42273
comp10158_c0_seq1	0.27891	NA	NA	NA	NA	1.13755	-0.61169	0.51852	NA	NA	1.80571	NA	NA	NA	NA	-0.33353
comp1015894_c0_seq1	0.27891	NA	-1.22473	NA	NA	2.8442	NA	-0.41534	0.3269	NA	0.03287	NA	0.39376	NA	NA	-2.21407
comp1015913_c0_seq1	-0.31006	NA	0.29718	-5.18236	0.00433	4.18442	-9.93782	-0.14541	0.54834	0.00433	-1.26699	-5.96005	NA	5.77074	-1.2928	-2.09352
comp1016017_c0_seq1	0.81518	0.84482	NA	0.09725	0.18963	-0.94883	-0.61172	-0.19312	0.407	0.18963	-1.81112	NA	NA	-1.93961	0.60175	1.45118
comp101627_c0_seq1	0.20245	NA	NA	0.06808	NA	-4.00619	-0.58354	-2.26064	0.08157	NA	0.17777	-6.20083	0.01925	3.61156	-1.59981	2.96038
comp101633_c0_seq1	-0.67163	0.56593	0.02137	-1.84297	-0.9574	-0.94209	-0.61168	0.18948	0.31095	-0.9574	0.72733	NA	-0.18188	NA	NA	0.51829
comp1016387_c0_seq1	-0.37023	NA	-0.2938	NA	NA	-0.30359	0.63476	-0.97429	0.80779	NA	0.358	NA	2.0656	-4.45	2.98377	-1.43563
comp1016436_c0_seq1	0.08106	NA	0.932	-0.82194	-1.4539	0.2463	1.6483	-1.38467	3.0015	-1.4539	-1.23798	-0.97605	-0.67756	2.62687	-0.88081	0.114
comp101649_c0_seq1	0.04454	1.63592	0.76186	0.48464	-0.50618	2.88747	-4.74423	0.29411	-0.03414	-0.50618	1.62424	-2.98652	-0.02301	-0.05924	1.3572	-2.74689
comp1016576_c0_seq1	-0.26831	0.56593	-1.42014	NA	-0.55157	1.3627	NA	NA	-0.17543	-0.55157	NA	-4.20327	-3.15836	NA	NA	7.08835
comp101658_c0_seq1	NA	NA	-1.59391	1.8546	0.9133	2.18683	-7.81532	-0.23949	-5.83142	0.9133	-1.43998	-1.70995	-2.35293	NA	NA	-2.265
comp1016602_c0_seq1	0.5995	NA	-1.22473	NA	NA	-0.68228	NA	NA	-1.02229	NA	-0.01124	NA	NA	NA	NA	-0.3335
comp1016775_c0_seq1	-0.46801	NA	NA	1.0677	-0.28514	0.62877	2.83095	NA	0.17536	-0.28514	-1.24634	-0.83141	2.03834	4.46775	NA	-0.33388
comp1016822_c0_seq1	0.419	1.61051	-1.65056	-1.8369	-0.28344	-0.93769	-0.61174	1.61386	0.24745	-0.28344	1.94996	0.07822	NA	-4.46736	-0.89679	0.05453
comp101701_c0_seq1	-0.25049	1.85499	2.65833	1.64945	NA	0.18056	-6.75378	0.98522	2.84149	NA	-0.86857	-2.22806	-1.52926	0.60222	0.89772	0.29237
comp10171_c0_seq1	-0.33662	NA	0.17938	-0.49299	-1.11016	1.97613	1.23922	0.20874	0.58285	-1.11016	-1.19775	NA	3.03169	-0.65756	-5.2113	-0.04824
comp1017135_c0_seq1	0.23129	NA	NA	0.36981	1.46684	-0.0413	0.64655	2.33898	NA	1.46684	-0.54975	NA	NA	NA	-2.97466	-0.33347
comp1017233_c0_seq1	-0.54293	NA	0.00624	-1.13648	2.83622	1.24758	-0.61176	0.00612	-0.77342	2.83622	-0.32011	-2.22729	-1.58019	0.84824	NA	-1.7144
comp1017336_c0_seq1	0.89196	NA	-0.88045	-0.55109	-0.17833	0.35238	-0.30895	-0.29464	-2.59216	-0.17833	0.66167	1.64159	5.13949	-1.72109	-0.47365	-1.58502
comp1017394_c0_seq1	-0.36228	NA	NA	2.66097	NA	-0.68226	-5.21183	1.38553	NA	NA	-2.28484	-0.73281	2.03834	NA	1.45001	-0.33345
comp101762_c0_seq1	0.1073	-0.19886	-1.41408	-0.79971	0.00436	-2.09401	4.42952	-1.70782	1.78091	0.00436	-1.94233	-3.72276	0.2636	1.07625	-0.58485	1.21982
comp101764_c0_seq1	-0.22579	0.83396	NA	4.12475	0.89471	-0.85151	-7.31346	1.59775	-1.87913	0.89471	2.20735	-4.84439	1.1429	0.04604	1.39287	0.73533
comp1017679_c0_seq1	-0.30759	NA	1.94687	-0.41925	-0.21367	2.05765	3.83089	-0.10736	-0.98138	-0.21367	1.21048	1.50853	-0.56009	0.19734	-1.285	-2.81565
comp1017781_c0_seq1	0.42359	1.63592	3.20781	-4.08001	NA	-2.38471	-0.6117	-0.67688	-0.28811	NA	1.29829	NA	-1.40232	1.5788	2.37241	-0.00623
comp101787_c0_seq1	0.53116	1.11139	-0.02251	-0.05228	-0.4457	0.03894	-0.31783	-0.07728	-0.02814	-0.4457	0.65143	0.00054	-0.45418	3.16693	-0.82235	-0.66963
comp101788_c0_seq1	-0.059	NA	NA	NA	NA	0.12472	-0.90418	NA	-0.09275	NA	0.95053	NA	-1.04892	-3.51529	NA	-0.33362
comp1017940_c0_seq1	-0.36417	1.61051	0.97537	-2.04772	0.96614	1.43657	-2.75963	-0.61031	0.4471	0.96614	-2.41989	-5.03947	-0.69547	2.72078	-4.35062	-0.47635
comp101800_c0_seq1	0.03933	0.66618	NA	1.03826	-1.81332	-0.17666	-1.32885	0.45971	0.87373	-1.81332	0.08126	NA	1.04651	-0.16108	-0.6579	-0.57212
comp101806_c0_seq1	0.43054	NA	2.19715	0.09725	NA	-1.21128	0.55165	2.43869	0.3269	NA	-1.85527	NA	0.00898	-1.93961	3.96159	-4.50434
comp101808_c0_seq1	0.27891	0.38916	-0.26195	-5.93387	1.00521	-0.04121	NA	NA	-0.66236	1.00521	-0.01124	NA	-2.54623	NA	NA	-0.33344
comp101845_c0_seq1	0.15711	0.56593	-0.76189	2.15287	0.11335	-1.45363	-2.76522	1.71897	-0.65762	0.11335	0.3222	NA	0.74828	3.98805	2.37241	-1.41224
comp1018813_c0_seq1	-0.45824	NA	0.40154	-2.50137	0.66187	-0.82801	NA	-1.06105	NA	0.66187	2.68325	NA	NA	-3.10187	NA	1.78132
comp1018933_c0_seq1	0.07759	NA	-0.88055	-2.00095	-1.79768	0.23551	1.19051	-1.64725	3.42589	-1.79768	-1.56542	NA	-0.2315	1.82579	-1.49418	-0.90829
comp101897_c0_seq1	-1.72396	NA	NA	-0.65526	0.96615	0.2536	NA	-1.1859	-3.52823	0.96615	2.77751	1.38133	0.25345	NA	NA	-7.802
comp1019082_c0_seq1	-0.33837	NA	NA	-2.92768	NA	-0.09186	-4.08044	-0.81782	-1.16404	NA	-0.81669	-5.45247	2.2597	0.09623	NA	0.26191
comp101909_c0_seq1	-0.29325	0.56593	-0.65479	-1.91555	-0.31544	-0.04019	-0.61176	-0.51554	-0.65942	-0.31544	3.81158	-2.09523	-0.25772	0.76897	-1.18502	-0.53411
comp10191_c1_seq1	0.99331	1.63592	-0.23889	2.66097	-2.47692	-1.91513	-0.61165	-1.09213	-2.48109	-2.47692	-0.12061	1.89034	-3.53721	-3.58182	0.33388	-0.63041
comp1019188_c0_seq1	NA	NA	-1.22529	3.54537	0.98142	1.86957	NA	-0.23938	-5.29623	0.98142	0.95054	-1.98573	-0.23291	NA	NA	-0.3335
comp1019284_c0_seq1	0.11474	1.87707	-1.18768	0.31555	0.00437	-3.60842	3.87212	-1.27239	-1.91167	0.00437	1.01665	-3.50877	-1.43157	2.41447	-1.92426	3.18373
comp1019454_c0_seq1	0.46363	0.56593	0.77637	0.20622	0.00438	0.40042	-5.92984	-1.562	-0.45818	0.00438	0.03809	-5.03947	0.41829	-0.13718	-1.285	-2.7082
comp101956_c1_seq1	-0.41607	0.72552	NA	0.71991	-1.81601	0.50353	-0.61168	0.09551	2.44511	-1.81601	0.36702	NA	0.02775	-0.13786	-1.66314	-2.00321
comp1019593_c0_seq1	-0.32624	2.10268	-1.22395	1.12906	0.05132	0.96372	NA	-1.4348	0.25761	0.05132	2.0292	NA	2.299	1.72252	1.44363	-2.23314
comp101960_c0_seq1	0.29152	NA	-2.12587	0.33398	0.64618	-1.68314	2.6811	0.11064	-2.09388	0.64618	0.48568	0.37847	0.55562	0.02469	-0.43708	1.83924
comp101966_c0_seq1	-0.56127	NA	0.17142	-0.77551	-0.07505	-1.93041	NA	-0.96015	0.24373	-0.07505	-0.09638	1.81533	1.51083	0.38611	2.39208	-5.78113
comp1020079_c0_seq1	-0.04169	0.26898	-0.2938	0.07455	1.33594	1.20713	0.59591	NA	-0.15399	1.33594	1.35852	NA	-0.7896	-5.58112	-8.22383	1.40411
comp102014_c0_seq1	0.74534	0.50445	0.55502	0.53126	-0.42938	0.59411	-6.57134	-0.14532	-0.32415	-0.42938	0.31441	-0.67125	-0.54141	-0.63629	-0.70442	0.32416
comp102040_c0_seq1	-0.16381	NA	1.55326	1.13854	-0.7447	5.48989	-7.37905	0.39079	0.2854	-0.7447	-1.75328	-4.91427	0.69642	1.42855	0.77659	1.37334
comp102046_c0_seq1	-0.50623	0.65182	0.63829	0.07909	0.30374	-1.12582	2.8904	-0.19113	0.26529	0.30374	-0.05176	NA	1.10795	NA	NA	4.03672
comp10205_c0_seq1	-0.79194	NA	-0.30324	NA	0.91215	-1.82001	NA	-0.29247	2.87179	0.91215	1.78223	1.31733	3.71276	-2.02986	NA	3.36688
comp102093_c0_seq1	0.6242	NA	3.97122	3.09595	-0.29106	0.85851	-8.04487	0.07374	-2.24212	-0.29106	1.20896	0.91412	-1.2768	2.90984	-0.06867	-1.13699
comp1021180_c0_seq1	0.14956	NA	-0.62457	-0.88434	0.00436	-2.20111	1.39136	0.02385	-1.41355	0.00436	0.2909	-1.92301	1.47478	1.05124	-1.88567	3.50775
comp1021333_c0_seq1	0.96357	1.13299	NA	NA	NA	-0.36111	NA	NA	0.3269	NA	-3.25852	NA	NA	NA	-3.24012	-0.33367
comp1021380_c0_seq1	NA	NA	NA	NA	NA	NA	NA	NA	NA	NA	NA	NA	NA	NA	NA	NA
comp10214_c0_seq1	NA	NA	-0.2938	NA	NA	NA	NA	NA	-0.15399	NA	NA	NA	NA	NA	NA	NA
comp102146_c0_seq1	-0.32128	NA	0.76035	-0.45945	NA	2.81941	-9.76029	-0.16672	0.45757	NA	-0.4435	NA	-1.06846	-1.48423	5.55409	-0.33365
comp1021471_c0_seq1	-1.05308	NA	NA	0.09724	0.48658	2.84264	-0.61165	1.1593	0.3269	0.48658	-2.6897	NA	NA	-1.93961	NA	-1.42207
comp102150_c0_seq1	-0.1334	0.56017	0.17336	-0.63006	-0.02047	-0.7055	0.24671	0.15105	0.96063	-0.02047	-0.43685	0.4499	-0.30718	0.54397	-1.53543	1.59851
comp102159_c0_seq1	-0.15355	0.55507	NA	4.55725	0.83967	-1.59094	0.62859	-0.68786	0.10381	0.83967	3.82987	NA	-1.41416	1.06295	NA	1.43243
comp102169_c0_seq1	NA	NA	NA	-0.70595	-0.38541	0.4218	NA	0.41067	NA	-0.38541	2.62744	NA	0.51664	-9.58831	NA	5.84021
comp1022031_c0_seq1	0.30391	NA	2.09941	-0.35467	0.04462	-0.27641	-0.61167	-0.43858	-0.14295	0.04462	-0.56625	2.10135	1.87545	-3.11444	-2.21919	1.34938
comp1022116_c0_seq1	-0.6258	1.43964	1.49998	-0.2563	NA	0.70349	2.83087	-0.00143	0.41227	NA	-0.98126	-1.75965	2.03834	-2.98117	1.60876	-1.35333
comp102248_c0_seq1	-0.28495	NA	-0.50458	1.2328	0.13984	-0.18273	1.65916	0.82189	-1.89238	0.13984	2.1251	2.4598	0.80545	-0.17777	0.71279	0.82543
comp102253_c0_seq1	-0.6946	1.80369	-1.15151	0.68683	0.00435	0.67614	-1.24771	0.92287	0.42859	0.00435	-1.09175	4.8719	0.38167	NA	-1.62957	0.54508
comp102253_c1_seq1	-0.52907	0.64244	-0.96372	2.4206	-1.81028	NA	-1.65968	-0.41534	0.36206	-1.81028	0.95054	NA	NA	NA	-0.6977	NA
comp1022566_c0_seq1	0.89657	NA	3.52433	-6.54081	1.90696	-0.17825	2.23515	1.30785	3.69949	1.90696	-0.79074	-4.54738	-1.16517	1.09898	2.29379	1.71903
comp1022606_c0_seq1	-0.36228	0.53702	NA	NA	-1.81417	NA	NA	NA	NA	-1.81417	NA	NA	NA	NA	NA	NA
comp1022768_c0_seq1	0.10975	NA	-0.52676	-4.08529	0.96614	1.73361	-3.74298	-2.79586	2.57879	0.96614	2.05817	-6.04165	-2.4653	1.90178	1.4738	-1.4282
comp102280_c0_seq1	-0.42451	NA	-0.50809	NA	-1.00576	0.75144	0.6809	-1.96056	2.76976	-1.00576	-0.61509	0.86761	-1.42199	-1.63883	0.36339	-1.03198
comp1022862_c0_seq1	0.06768	NA	0.21068	0.2376	NA	-0.47173	-2.75959	0.70887	0.16092	NA	1.26635	-3.79946	2.299	-0.7269	-1.2034	-3.40149
comp1023_c0_seq1	NA	NA	NA	NA	NA	NA	NA	NA	NA	NA	NA	NA	NA	NA	NA	NA
comp10230_c0_seq1	-0.06245	0.56593	3.05643	2.66094	1.64511	0.56465	NA	-0.68271	-2.41854	1.64511	-1.52306	NA	1.82157	0.31679	NA	-0.33364
comp10231_c0_seq1	-0.17811	NA	-1.18779	1.12402	0.96615	1.2189	NA	NA	-2.2576	0.96615	-0.22831	NA	NA	-1.34699	NA	-0.33355
comp102310_c0_seq1	0.25407	NA	-0.87378	0.68775	-2.44046	-0.718	-5.58256	-0.53763	-1.35389	-2.44046	2.52768	NA	0.73169	0.83371	-0.50812	1.00242
comp102313_c0_seq1	0.7787	0.10636	-0.21008	NA	-0.58689	NA	NA	0.54644	-0.52087	-0.58689	2.69825	NA	NA	NA	NA	NA
comp102327_c0_seq1	1.11469	NA	NA	NA	NA	-4.81221	-5.37779	NA	-5.35643	NA	NA	NA	NA	-3.10187	NA	-0.33348
comp102328_c0_seq1	0.03247	1.11139	NA	-0.03283	-0.23921	3.4083	NA	NA	0.05861	-0.23921	-1.21782	NA	NA	NA	NA	-0.33366
comp1023327_c0_seq1	-0.33282	NA	0.5168	-2.50137	1.89271	-0.44512	-0.61166	0.05162	-1.59875	1.89271	0.76107	1.57957	NA	-1.03793	3.24526	-1.64206
comp1023454_c0_seq1	-0.18034	0.56593	NA	6.44097	NA	-0.68235	NA	-2.31131	-2.22367	NA	2.73007	NA	-0.4121	-1.42223	-2.30413	1.78125
comp1023747_c0_seq1	-0.42377	NA	-1.47674	-1.30963	-1.47667	-2.98813	2.83081	-0.03753	-1.34991	-1.47667	0.90617	1.18138	-0.25772	-0.7214	-1.42221	6.45098
comp102377_c0_seq1	1.01304	NA	1.73553	2.4206	1.67548	-3.78693	6.53138	-1.1752	NA	1.67548	2.79008	NA	NA	-0.12076	-0.00542	-0.58283
comp102382_c0_seq1	0.55351	NA	0.63829	1.56201	-0.84188	5.66486	-6.55148	-0.58057	-0.04962	-0.84188	0.92403	NA	NA	-0.54257	0.58717	-7.84641
comp1023851_c0_seq1	0.1345	NA	0.63829	3.04957	0.00438	3.85217	NA	-0.50205	-0.53272	0.00438	0.16039	-0.25715	3.03169	-0.7278	-1.91522	-1.38828
comp1023988_c0_seq1	-0.40716	NA	0.79058	4.79291	-0.09478	1.22945	NA	0.43836	-0.70966	-0.09478	-0.46488	NA	1.50979	-1.34566	-6.81092	1.23635
comp10241_c0_seq1	0.03242	NA	0.15072	4.843	0.8576	0.73298	-0.30039	1.45255	0.16827	0.8576	-0.47639	0.25374	0.25135	-0.30361	0.52116	-0.3112
comp10243_c0_seq1	0.57975	NA	0.4947	0.33425	0.00437	0.42196	-3.76327	0.32853	3.07386	0.00437	1.40473	NA	-2.03911	-2.61497	1.8851	-0.74297
comp1024398_c0_seq1	-0.83065	NA	-0.52313	-3.14225	-0.95741	-0.31183	-0.61173	0.34116	-0.49484	-0.95741	0.19366	-1.53805	2.03834	-3.20811	-2.06882	1.42389
comp102449_c0_seq1	-0.20389	0.11352	-0.81444	-0.86297	3.44516	0.18515	-1.12425	-0.25326	-2.18585	3.44516	0.46828	-5.03947	-3.7288	1.47583	-0.69151	-2.51298
comp10246_c0_seq1	-0.03714	NA	-0.27286	0.87805	0.06691	2.20208	-0.61176	0.63028	-0.0331	0.06691	-2.28804	2.90236	NA	-1.59799	0.43165	-1.48447
comp1024746_c0_seq1	0.42426	NA	NA	-0.32181	NA	1.01195	NA	0.10841	-1.99639	NA	0.49283	NA	2.34254	0.3443	NA	-0.34416
comp102475_c0_seq1	-0.2686	NA	-1.22473	2.10592	NA	0.14471	0.09603	1.50897	0.80932	NA	-0.97301	-3.91972	3.03169	0.53744	-2.10788	1.76023
comp10250_c0_seq1	1.19242	NA	NA	1.44203	0.00436	0.18777	-3.35945	0.17979	NA	0.00436	1.82012	-5.58257	NA	-0.09983	NA	1.22314
comp10251_c0_seq1	-0.29163	NA	-0.71398	3.66394	-1.1308	-0.92674	-0.61174	0.5985	0.15736	-1.1308	-1.05125	NA	2.299	NA	NA	2.40291
comp1025427_c0_seq1	0.59032	NA	-0.83086	1.56508	0.91103	-0.05992	-2.75958	0.60643	0.14815	0.91103	0.11124	-2.72246	3.30478	0.53074	0.85168	1.21699
comp10256_c0_seq1	0.53228	0.56593	-1.50366	NA	0.8882	NA	NA	NA	0.19075	0.8882	-0.01124	NA	-2.54623	NA	NA	NA
comp10256_c1_seq1	1.25274	0.85938	-0.45739	-1.16916	0.00438	0.96036	2.83095	0.71911	-0.55965	0.00438	-2.15584	0.25374	1.50979	4.49094	0.16297	0.49508
comp102566_c0_seq1	0.15123	NA	0.22271	-0.6027	-1.31226	0.7766	-2.76755	-0.32323	-0.75888	-1.31226	0.7229	NA	-1.14397	-0.5468	-0.68892	-0.18898
comp10259_c0_seq1	NA	NA	NA	NA	NA	NA	NA	NA	NA	NA	NA	NA	NA	NA	NA	NA
comp1025900_c0_seq1	-0.40121	0.39241	0.06237	-0.71734	1.01574	-0.82256	-3.35913	-0.16007	-0.19381	1.01574	0.12701	-7.78035	5.10381	-1.81567	-0.42539	1.85846
comp102617_c0_seq1	-0.22289	NA	NA	3.02006	NA	-1.37063	0.69171	-2.61244	0.76481	NA	-3.27258	NA	-1.06897	-5.00432	-1.83298	1.37338
comp10262_c1_seq1	0.33743	0.84482	0.38064	NA	0.79034	1.86679	-0.61173	0.12278	-1.42337	0.79034	-0.86153	0.25374	NA	1.4713	2.0938	-2.37668
comp1026436_c0_seq1	0.41546	NA	-3.10326	NA	-0.10948	-1.18437	NA	NA	0.76062	-0.10948	0.11961	NA	0.62069	-5.26972	NA	-3.79797
comp1026729_c0_seq1	-0.21502	NA	0.23732	NA	NA	5.6013	-1.7484	1.28184	NA	NA	0.22996	NA	NA	-2.93195	-0.80808	-4.21399
comp102673_c0_seq1	-0.4531	0.44163	0.63955	-1.85662	NA	1.16539	NA	-1.24068	-2.39587	NA	0.64746	NA	-1.32265	1.76817	-0.3335	-4.97817
comp1027_c0_seq1	-0.7531	NA	0.5168	3.54528	-0.9574	0.39964	-0.61175	-0.41449	0.9383	-0.9574	2.09275	-6.63038	NA	3.45869	2.37241	2.76982
comp102701_c0_seq1	0.10209	NA	0.27519	-1.35833	-0.75485	-3.80571	0.72446	-1.55174	-2.65999	-0.75485	1.21022	-8.49261	3.71276	4.278	-0.11267	3.78517
comp1027262_c0_seq1	-0.24688	NA	NA	4.48183	0.04345	-0.63845	1.68415	-0.91125	-2.13555	0.04345	-0.30905	-2.09523	NA	2.41466	0.12961	0.69456
comp102738_c0_seq1	-0.00567	NA	-0.77837	-0.64792	-0.60331	1.17562	-2.25094	-0.24691	0.56152	-0.60331	-0.18332	-2.53715	0.09634	0.92488	0.89237	-1.71187
comp10274_c0_seq1	-0.99871	0.84482	0.50586	1.78927	1.85502	-3.10615	NA	NA	0.2329	1.85502	0.95055	NA	2.00581	1.71315	-0.6723	-0.33367
comp1027431_c0_seq1	-0.53439	NA	-0.8432	-1.63578	-0.46964	0.26518	-2.75958	-0.41534	0.02689	-0.46964	0.86037	NA	-0.70911	1.32779	0.87519	-1.40902
comp1027583_c0_seq1	0.02139	NA	1.99287	-3.18823	-0.85169	-0.0413	NA	-2.12369	0.30287	-0.85169	1.86559	NA	-0.23291	-2.16604	-0.6723	1.78133
comp102762_c0_seq1	-0.55171	0.7251	0.82622	-1.67901	-0.24982	0.48562	-0.6117	-0.67791	NA	-0.24982	-0.21165	-4.84439	5.20821	-5.10268	-0.29195	-0.08493
comp1027798_c0_seq1	-0.24522	-0.02374	-1.22473	-0.14226	0.03451	2.39847	-2.21119	-0.16753	-0.3509	0.03451	1.47364	NA	1.59687	3.27224	-0.79816	-2.26518
comp10279_c0_seq1	-0.60043	1.63592	NA	2.6461	NA	0.10742	NA	NA	1.56572	NA	2.26601	NA	NA	NA	NA	-3.19468
comp102790_c0_seq1	0.34057	NA	NA	2.20119	0.32289	3.88506	-2.22787	NA	NA	0.32289	NA	NA	-1.45435	-4.38019	NA	-6.08283
comp102815_c0_seq1	-0.28892	1.63592	0.27	-0.0361	0.00438	1.63928	-3.77985	-0.38987	1.01179	0.00438	-0.05002	NA	-1.1939	-1.24609	0.02516	-1.11557
comp102827_c0_seq1	0.98156	0.55507	-0.28749	-0.82294	-0.14828	-0.61454	0.85783	-0.63436	-0.22479	-0.14828	-0.53726	NA	1.74478	0.75079	0.6271	1.01953
comp1028285_c0_seq1	0.55326	NA	NA	-1.01145	0.80442	-0.03969	0.6547	0.17915	-0.62754	0.80442	0.12705	NA	3.61426	-0.23444	-0.34946	-4.27327
comp102836_c0_seq1	-0.99871	0.01221	NA	4.17124	-0.32111	NA	NA	1.64272	-0.22384	-0.32111	-0.0555	NA	1.11527	NA	NA	NA
comp1028438_c0_seq1	-0.3458	NA	-0.7862	-3.36725	-0.56866	-0.25987	0.66724	0.72931	-0.7642	-0.56866	0.06202	-1.42215	-0.31853	-1.03052	-3.79212	1.20566
comp1028665_c0_seq1	0.08986	1.63592	NA	3.06424	-0.9574	-2.10036	-2.75964	0.33359	-1.06157	-0.9574	-0.27354	NA	-2.89252	-0.10758	-0.76108	0.86164
comp102890_c0_seq1	0.15293	0.41782	-1.3866	1.26099	1.8745	-3.00023	-1.70006	-4.09026	-1.67618	1.8745	1.47397	-2.22359	0.9205	2.36674	-2.02233	3.23125
comp1029015_c0_seq1	-0.84812	1.63592	1.17266	0.83558	2.46145	-0.38661	2.71329	0.25848	-0.50807	2.46145	0.55147	NA	-0.96759	0.41048	-2.51085	0.94469
comp1029080_c0_seq1	0.55453	NA	NA	-0.52671	0.96616	-0.0412	-3.35938	-2.05752	-2.12905	0.96616	1.00982	0.25374	2.299	2.72597	NA	NA
comp1029219_c0_seq1	-0.39174	NA	0.61815	-0.79706	1.50118	2.6757	NA	2.74284	-0.33494	1.50118	-0.54437	-0.40933	-1.40232	-0.04059	1.44363	-0.33374
comp102923_c0_seq1	0.36946	NA	9.07467	1.672	-0.6727	1.9223	-3.72957	-1.37358	1.47531	-0.6727	-0.59739	-5.7505	-5.32286	-0.25743	3.94551	-4.492
comp102938_c0_seq1	NA	0.86715	-1.22473	NA	-0.41981	NA	NA	-0.41534	-0.15399	-0.41981	3.33037	NA	1.00449	NA	NA	NA
comp102955_c0_seq1	-0.03267	NA	0.25992	-0.41984	0.08397	0.33371	0.41856	-0.10544	0.00497	0.08397	-0.16354	-0.72068	-0.58811	-0.12012	1.23786	0.20035
comp1029943_c0_seq1	0.2089	0.55507	0.17461	NA	1.29938	-2.87073	-3.32502	-0.37656	-1.72998	1.29938	0.55269	NA	-0.2106	-0.92319	3.41893	0.76787
comp10301_c0_seq1	-1.53458	1.61051	2.20929	-0.33609	1.14867	1.35904	-2.7607	0.61859	-1.77146	1.14867	-0.65695	NA	3.17408	-1.02771	-0.6723	-0.41372
comp10302_c0_seq1	0.59951	1.63592	NA	NA	0.96615	NA	NA	NA	-0.15399	0.96615	NA	NA	2.299	NA	NA	NA
comp10303_c0_seq1	-1.18058	NA	1.20523	-2.19208	1.88051	1.58316	0.66433	-0.39473	1.72183	1.88051	0.95052	NA	-2.89252	-3.17411	-1.49825	4.06793
comp1030353_c0_seq1	0.1823	NA	0.38186	-0.36234	-2.70976	-0.37679	3.83084	-0.6116	-0.78403	-2.70976	-0.95192	3.35062	0.41829	-4.79473	-1.285	-2.03518
comp103047_c0_seq1	0.03683	NA	-0.00596	1.00841	0.00436	0.39489	-2.32243	0.35869	-0.96948	0.00436	0.19565	NA	-0.17572	-0.09569	-0.68325	-0.56438
comp10305_c0_seq1	1.00168	-0.34437	0.39976	-0.00045	0.33873	0.33056	0.62439	0.53142	1.86707	0.33873	0.75196	0.37847	0.90038	-0.74767	-2.84832	-5.0348
comp10308_c0_seq1	0.47872	NA	-0.26945	1.22964	0.96615	-2.50621	0.26025	-0.10071	-1.83051	0.96615	2.97933	-2.70331	4.02805	2.99759	0.1801	0.7173
comp1031314_c0_seq1	-0.04168	NA	NA	NA	0.96615	-1.06901	-0.61166	0.32325	-0.58251	0.96615	2.3521	-0.52817	0.21314	NA	-0.6723	1.32027
comp103175_c0_seq1	-0.12342	1.61051	0.83589	1.6664	0.2463	0.70866	-2.29169	-0.01194	-0.8494	0.2463	0.32755	NA	4.52332	-2.47843	-1.24284	-3.29266
comp103175_c1_seq1	0.70179	0.56593	-1.00265	1.0528	-0.86496	1.03807	-4.56613	0.39722	-0.01269	-0.86496	0.07988	NA	4.17419	-2.28792	-1.62677	-1.58674
comp1032126_c0_seq1	0.90234	1.63592	1.24849	NA	NA	-0.68232	NA	0.54644	-1.07984	NA	-0.97299	NA	NA	NA	1.65955	2.78587
comp103219_c0_seq1	0.15269	NA	-1.14553	-1.67495	-0.85156	7.29545	-0.61167	-1.01394	1.08284	-0.85156	-2.59683	-2.9985	0.63079	0.67052	-0.29497	-2.83095
comp10324_c0_seq1	0.23729	NA	0.63829	-3.1844	0.21325	0.04393	-0.61168	0.59098	-0.15399	0.21325	0.88611	NA	-2.54623	-3.31558	3.51448	-0.91572
comp103246_c0_seq1	-0.36228	0.26226	0.82666	NA	0.56919	5.77525	NA	NA	NA	0.56919	NA	NA	NA	NA	NA	1.56541
comp103248_c0_seq1	0.13146	1.85499	0.14421	1.61045	0.96615	-0.47414	-1.51353	NA	-0.96825	0.96615	1.02548	0.01213	-0.1142	0.78624	3.61404	1.4738
comp103307_c0_seq1	0.10021	NA	-2.39902	0.28484	0.82851	0.71065	-2.33239	0.26719	0.79468	0.82851	0.31123	-0.92039	-0.18096	1.62621	-0.85432	-3.23619
comp103327_c0_seq1	0.12939	NA	NA	-1.4909	NA	-0.3689	-0.15912	0.45601	0.7312	NA	-0.17646	NA	1.5171	-0.17622	-1.97194	0.74271
comp1033364_c0_seq1	-1.46212	NA	NA	-2.19205	-0.9574	-5.47989	7.41592	0.25398	NA	-0.9574	-0.01122	NA	3.03169	NA	-1.45622	3.31835
comp103357_c0_seq1	0.02473	0.87024	0.27796	0.09646	-0.79662	0.5297	-0.26339	-0.36464	-0.16986	-0.79662	-0.34613	1.20617	-0.64339	0.51962	0.28182	1.09176
comp1033604_c0_seq1	-0.06616	NA	NA	-1.05114	0.96615	0.80193	-6.17275	0.87196	1.46625	0.96615	-0.48035	-8.52451	1.56324	1.87685	0.64966	-4.79733
comp103361_c0_seq1	-0.09464	0.2361	3.19739	-0.81812	0.88986	2.60503	-0.61167	-0.63829	0.9968	0.88986	-1.8735	-0.97797	-0.9529	-1.27319	-0.29738	-0.55523
comp103376_c0_seq1	-0.05469	-0.09989	NA	-3.00836	0.13461	8.0306	-3.35944	0.23679	-0.95935	0.13461	-0.26254	NA	-3.08681	-1.12351	1.44363	-3.21794
comp1033902_c0_seq1	-0.37689	NA	0.00143	-1.52962	0.20972	0.29696	-2.75965	0.10398	0.47452	0.20972	0.87091	0.72163	1.50979	0.17296	0.41814	2.3602
comp103397_c0_seq1	-0.68478	1.11139	-1.74106	3.65684	0.00438	7.03081	-0.61172	1.02734	0.80779	0.00438	-0.38191	0.25374	NA	-2.815	4.7122	-12.4873
comp10340_c0_seq1	0.81344	0.87024	2.96998	1.53513	0.32786	0.53702	2.83085	0.34814	-0.23976	0.32786	-2.80695	1.28356	NA	0.72379	NA	1.32786
comp1034056_c0_seq1	NA	NA	0.53693	NA	0.96615	NA	NA	-0.03316	-2.65417	0.96615	1.18338	0.37847	-1.27714	NA	NA	NA
comp1034090_c0_seq1	-1.4277	0.56593	NA	-2.50095	NA	-0.0412	NA	NA	NA	NA	0.95054	-5.03947	1.11527	NA	NA	NA
comp1034348_c0_seq1	0.04695	0.55507	-0.00963	1.15336	0.17022	-0.6929	-0.63681	0.305	-1.39878	0.17022	0.00212	NA	2.03834	0.87926	-0.0805	0.03704
comp103437_c0_seq1	-0.62235	NA	NA	0.40234	-0.99607	0.72926	-3.743	0.58967	-0.15399	-0.99607	-0.01128	NA	0.20328	2.71595	4.58636	-0.71749
comp10345_c0_seq1	-0.62087	NA	-0.83853	0.65279	-0.74529	1.21516	-2.76811	-0.03438	0.37651	-0.74529	-0.25999	1.31733	1.26523	-1.81665	0.79793	-3.41321
comp1034706_c0_seq1	-0.27776	0.56593	-0.87884	-1.56204	-2.47463	4.04508	-0.61174	-0.81809	2.04811	-2.47463	-2.40588	-0.15215	0.40589	-0.47027	1.92019	-3.26635
comp1034998_c0_seq1	0.21976	1.63592	-0.41774	0.48443	-0.11346	1.3237	-2.17046	0.19668	0.84344	-0.11346	0.83675	-2.16319	0.41411	2.25949	-0.47433	0.58321
comp103509_c0_seq1	0.21439	1.63592	NA	0.34518	-1.52958	2.32336	0.09136	-0.48264	1.48257	-1.52958	-0.91791	NA	NA	-1.691	-1.97914	-4.27691
comp103527_c0_seq1	0.92235	NA	-0.8914	2.30116	1.41595	-3.39206	-0.61167	2.29064	-2.07541	1.41595	1.94852	0.55616	0.41212	2.13593	-2.49485	2.41848
comp103528_c0_seq1	0.45354	NA	NA	NA	NA	-4.10624	-1.09491	NA	-5.00852	NA	NA	NA	NA	NA	-3.36135	5.04803
comp1035359_c0_seq1	0.16802	0.55507	-0.04806	-2.20446	-1.44132	0.11654	-0.6117	-0.72375	1.40993	-1.44132	-0.02368	NA	NA	-2.16604	NA	-2.61442
comp1035441_c0_seq1	-0.66599	NA	-0.03161	NA	-0.56245	-0.21681	NA	NA	-1.22242	-0.56245	NA	NA	NA	-2.16604	NA	-0.33343
comp1035444_c0_seq1	0.57597	0.84482	-1.22473	NA	0.48011	0.42949	NA	-0.13075	-0.58206	0.48011	0.95055	NA	NA	-0.11221	-0.6723	3.41261
comp10355_c0_seq1	-0.40485	NA	-1.19308	-0.4732	-1.32338	-0.16225	-0.61165	0.71124	1.5298	-1.32338	1.11061	NA	0.56982	-2.02926	NA	-1.4012
comp1035549_c0_seq1	0.19672	NA	-0.19875	3.9983	1.74729	-0.67271	-0.61174	-0.41842	-0.41108	1.74729	0.99732	-5.58257	-3.7288	1.5788	-1.17018	-0.18984
comp1035994_c0_seq1	NA	NA	-0.93619	-1.61558	-0.00375	NA	-4.37152	-0.11212	0.85303	-0.00375	-0.84559	-4.26943	0.30583	NA	NA	NA
comp10360_c0_seq1	-1.19028	NA	1.90058	1.8914	0.96614	-1.95633	3.45359	0.54644	-0.62952	0.96614	2.25316	-4.84439	3.17408	1.72252	-1.97608	4.07322
comp103617_c0_seq1	-0.06607	NA	0.00451	NA	-1.80741	NA	-0.61171	NA	NA	-1.80741	1.80237	NA	NA	2.15694	NA	NA
comp103626_c0_seq1	-0.08019	0.84482	0.11791	-0.7811	-0.66163	0.08919	-2.8371	0.29456	-0.28415	-0.66163	0.05602	-0.72079	-0.80934	-2.71886	1.72331	-0.97643
comp1036326_c0_seq1	1.29664	NA	NA	-2.19273	NA	2.20045	-0.6117	0.58926	0.30748	NA	0.95053	1.25065	NA	-1.8232	0.2115	-1.51234
comp103643_c0_seq1	0.63535	NA	-0.90637	NA	0.57701	NA	NA	NA	-1.17056	0.57701	NA	NA	NA	-4.37321	1.4417	NA
comp103646_c0_seq1	0.21993	NA	-0.17667	-3.99232	-0.9574	1.61037	-0.03781	-0.03436	NA	-0.9574	-2.22668	NA	0.77638	-0.63323	1.40569	2.83776
comp103652_c0_seq1	0.12855	NA	0.63829	3.42828	0.00436	-4.00005	7.46186	1.08494	-1.55849	0.00436	-1.5891	-2.47699	2.01337	4.5755	-2.04748	3.13772
comp103661_c0_seq1	-0.53743	NA	0.31935	2.14122	0.66287	1.59785	-2.75959	-0.11408	0.22269	0.66287	0.82874	NA	-3.53721	-3.02802	2.37241	1.13588
comp103665_c0_seq1	-0.57936	NA	2.87983	-4.18294	NA	-1.9952	-0.29866	0.3103	-1.80671	NA	-0.14458	NA	-1.5907	-1.27249	NA	0.0981
comp103666_c0_seq1	-0.35266	NA	NA	NA	0.84061	-0.04123	-2.75954	-0.33337	-1.887	0.84061	-1.01872	0.66023	NA	NA	NA	-0.33346
comp103687_c0_seq1	0.31368	NA	2.73351	0.82914	-0.95741	0.79924	-2.75957	1.40982	0.29554	-0.95741	-0.52493	-4.26943	0.05612	-2.70146	0.48184	-1.1611
comp103695_c0_seq1	0.01756	-0.39143	-0.66039	-1.74927	-0.4288	-1.21797	-4.56532	0.55218	-0.40803	-0.4288	-1.31246	NA	-4.79937	3.20981	-4.78799	0.18195
comp103700_c0_seq1	-0.03276	NA	-0.33541	0.45071	-0.30728	1.2606	-6.69608	-0.26189	-0.59718	-0.30728	0.51854	0.04369	NA	0.16824	-3.2531	-0.25792
comp103715_c0_seq1	-0.41353	0.56593	-0.20558	-0.55536	0.99436	0.25563	0.95869	0.26123	NA	0.99436	-0.36648	0.05475	-0.09053	0.5262	-3.64593	-1.14557
comp103719_c0_seq1	-0.68288	1.87941	-3.316	NA	-0.95741	NA	NA	1.87742	NA	-0.95741	NA	NA	NA	NA	NA	NA
comp103735_c0_seq1	NA	NA	NA	NA	NA	NA	NA	NA	NA	NA	NA	NA	NA	NA	NA	NA
comp103736_c0_seq1	-0.47982	NA	-0.02346	-1.11715	-1.30252	1.32011	-0.61169	0.39217	-0.52903	-1.30252	0.49424	1.38133	1.07115	0.28779	-0.87438	0.92956
comp1037554_c0_seq1	-0.36411	NA	0.88307	NA	-0.00388	0.27463	-0.61171	-0.263	-0.46259	-0.00388	0.7676	NA	NA	0.87236	NA	6.32178
comp103761_c0_seq1	-0.31283	0.3466	-0.13004	-0.23851	-0.3389	0.4767	-2.90825	0.18305	-0.38255	-0.3389	0.21295	1.09176	1.11527	-1.10511	1.49959	-2.79039
comp10377_c0_seq1	-0.09019	0.10636	NA	-2.19208	1.85162	0.5056	-2.75957	1.78005	-0.86724	1.85162	-0.01122	NA	NA	-2.02926	NA	-0.33357
comp103776_c0_seq1	0.43717	1.61051	-2.33537	3.20281	-0.62725	-2.84142	-6.44464	-0.12427	1.17118	-0.62725	2.25448	1.7423	2.60749	-1.28157	NA	-3.18223
comp103788_c0_seq1	0.03897	0.42503	NA	0.91589	-0.86708	-0.97777	0.74566	0.67702	0.52659	-0.86708	0.65803	NA	0.00779	-0.8784	0.5407	-1.19296
comp10380_c0_seq1	1.18531	-0.35169	-0.92529	0.95065	-2.81253	1.36671	NA	0.80593	0.60799	-2.81253	0.20834	-0.17955	3.61426	-1.51282	-0.14748	-0.89616
comp1038003_c0_seq1	NA	0.8494	NA	-0.01858	NA	-0.0412	-0.61165	0.09606	NA	NA	-0.80568	3.36701	-0.8087	NA	NA	-0.33367
comp103818_c0_seq1	0.05761	NA	-4.8651	1.38728	0.96615	0.93312	NA	2.43468	-1.06368	0.96615	-0.72993	NA	4.6299	-0.93557	NA	-8.62241
comp103821_c0_seq1	-1.4366	NA	0.26755	1.00592	-0.00179	1.1622	2.83086	0.35527	-0.64036	-0.00179	0.2017	-1.34317	-0.31853	-1.462	2.6022	1.4275
comp103822_c0_seq1	-0.86067	NA	0.33825	1.77542	0.01971	-1.22344	-0.61171	0.35309	-2.93582	0.01971	0.39403	1.22146	1.42814	-0.62934	0.20303	1.43155
comp103832_c0_seq1	-0.18286	NA	NA	NA	NA	-0.04121	NA	NA	1.19414	NA	NA	NA	2.03834	NA	-3.22984	-0.33348
comp10384_c0_seq1	0.30165	NA	NA	NA	NA	-1.87863	-3.35938	NA	-0.70684	NA	-0.2252	NA	NA	NA	1.44363	-0.33355
comp10384_c1_seq1	-0.67346	2.04943	0.06729	NA	NA	-0.04132	NA	NA	0.04858	NA	0.65053	NA	NA	NA	1.99421	-0.33344
comp103848_c0_seq1	-0.01816	NA	0.96413	0.38375	-0.61421	2.28875	-2.75957	1.22769	-0.1302	-0.61421	-0.31855	-2.91357	-2.89252	-1.15845	0.25064	-0.05356
comp10385_c0_seq1	-2.26488	NA	NA	NA	NA	-3.3359	2.83095	2.33441	0.17808	NA	0.31123	NA	-1.94741	1.71315	-1.72439	2.38122
comp103866_c0_seq1	-0.25476	NA	-0.23428	NA	NA	1.37196	NA	NA	-0.85864	NA	NA	NA	NA	NA	NA	1.37356
comp10388_c0_seq1	-2.00261	NA	NA	NA	1.09079	NA	NA	NA	NA	1.09079	NA	NA	NA	NA	NA	NA
comp103881_c0_seq1	0.33985	2.22557	-0.39207	0.74095	0.1451	-0.47789	-1.04686	0.34126	-0.64589	0.1451	0.22076	0.20794	0.98474	0.46272	0.60206	-0.10683
comp103888_c0_seq1	-1.09239	0.32451	-2.37218	2.00833	3.17347	2.08869	-0.61165	0.16238	-4.591	3.17347	0.43691	-2.3184	0.39699	7.51961	-3.84976	-2.14366
comp103890_c0_seq1	0.08582	NA	NA	NA	NA	0.11337	0.69483	NA	-0.86801	NA	NA	NA	NA	NA	1.98339	8.23849
comp1038933_c0_seq1	-0.36228	NA	NA	NA	NA	-2.85758	3.83088	NA	NA	NA	NA	NA	NA	NA	-1.18256	-0.33357
comp10390_c1_seq1	0.5995	1.61051	NA	4.60615	0.70931	-0.04127	NA	0.54644	1.12896	0.70931	3.19695	NA	-0.57919	2.57213	-0.6723	-0.33352
comp103902_c0_seq1	-0.90688	NA	NA	-3.18406	1.89582	0.59993	NA	0.45478	NA	1.89582	0.95052	NA	2.299	NA	-1.83298	-0.33344
comp103910_c0_seq1	0.56058	NA	-0.18249	1.72783	0.23357	1.89556	2.83091	0.40314	-0.19671	0.23357	-1.09132	-0.92639	-0.35016	-1.90002	-2.4247	0.91314
comp103921_c0_seq1	-1.47464	NA	1.58215	NA	-0.73144	0.61049	-0.61165	-1.36438	0.80779	-0.73144	-0.01127	NA	-3.18922	NA	1.44363	-0.33367
comp103931_c0_seq1	-0.24244	0.55507	-2.48752	1.95679	NA	-1.03875	2.47779	1.86357	-0.70684	NA	3.24702	-6.05884	0.02775	NA	-4.40968	1.37323
comp103934_c0_seq1	-0.50446	0.09087	NA	NA	0.71185	-0.0412	-2.75957	-0.41534	NA	0.71185	-0.01124	NA	NA	3.56987	NA	-0.33344
comp103937_c0_seq1	0.27891	0.3014	-1.07889	0.09725	2.46327	-0.68401	NA	-0.22346	NA	2.46327	-1.81112	NA	NA	NA	NA	-0.33346
comp103948_c0_seq1	0.68725	NA	0.47617	2.50456	0.00435	-0.38943	-4.33267	-0.4814	-0.0913	0.00435	0.39709	-1.23191	2.03834	-1.06569	-0.6723	-0.64856
comp103950_c1_seq1	0.56272	NA	-0.6863	-0.56464	0.0588	0.0725	0.683	0.19992	-2.5914	0.0588	-0.82712	NA	0.10215	-0.34433	-1.54086	-3.05837
comp1039581_c0_seq1	0.55704	0.56593	0.81591	NA	-0.9574	-0.04128	-3.74295	0.06555	-0.15399	-0.9574	-0.01124	NA	0.02775	NA	NA	-0.33352
comp10396_c0_seq1	-0.17074	NA	NA	4.93541	-0.86906	-3.42208	2.24083	-1.98548	-1.56655	-0.86906	2.86916	-2.91212	-3.90002	-1.68056	-1.19768	2.03405
comp103966_c0_seq1	0.12244	NA	0.15111	1.11142	-1.4361	0.88682	-1.50733	1.31744	0.35864	-1.4361	0.07516	-1.10292	1.3442	2.12489	0.10909	-0.14707
comp1039689_c0_seq1	0.02488	NA	0.5168	1.95766	0.96615	2.2863	0.68296	-0.89624	1.2078	0.96615	-1.44027	NA	0.40846	-4.29297	1.24316	1.78124
comp103972_c0_seq1	0.10671	NA	-0.67975	-1.82303	0.54771	0.35388	0.11811	-0.44151	NA	0.54771	0.21797	NA	-4.1189	-3.17411	-0.42113	0.73515
comp10398_c0_seq1	NA	NA	NA	NA	NA	NA	NA	NA	NA	NA	NA	NA	NA	NA	NA	NA
comp103980_c0_seq1	-0.46438	NA	NA	0.35741	NA	0.06222	-0.61165	-0.32226	-0.66643	NA	-1.86126	-3.79946	NA	NA	-5.84507	0.92824
comp103989_c0_seq1	-0.15928	NA	1.61599	-5.79904	1.85653	-2.77637	6.29038	-1.35465	-1.97747	1.85653	-0.63067	-5.58257	NA	-0.11425	-2.14322	4.44955
comp103990_c0_seq1	NA	0.56593	NA	NA	0.00438	NA	NA	2.07912	-0.32406	0.00438	0.74764	NA	NA	NA	NA	NA
comp104013_c0_seq1	0.57982	NA	-0.11703	-2.33885	NA	0.46732	NA	-0.42783	-1.53369	NA	0.01757	NA	0.88763	NA	-0.6723	1.78039
comp1040159_c0_seq1	0.46167	NA	0.1643	3.54456	-0.9574	-0.55504	-2.75961	-0.61202	0.81915	-0.9574	-1.87059	NA	NA	1.08142	2.79227	0.94909
comp104019_c0_seq1	0.59951	NA	-1.74106	0.0972	-1.9423	-1.20036	-0.61165	-0.41441	-2.28638	-1.9423	-2.15679	-2.24802	-2.54623	1.01832	NA	-2.09368
comp104027_c0_seq1	-0.37838	NA	-1.22473	2.6341	-0.09906	-1.01082	-0.63519	1.03864	-1.4832	-0.09906	NA	NA	1.42116	NA	-5.63855	1.29799
comp10403_c0_seq1	0.26475	0.63689	0.92476	-0.68477	0.00438	1.23079	-3.75512	0.31158	1.45843	0.00438	-1.12117	NA	-1.24217	-0.60211	3.06624	-1.46806
comp10403_c1_seq1	-0.19724	0.39241	1.1702	-0.14287	-0.9574	1.56367	-4.92585	0.48965	0.8138	-0.9574	-0.79836	NA	-1.25238	0.53976	0.88116	-1.86207
comp1040373_c0_seq1	-1.10324	NA	NA	NA	NA	NA	NA	NA	-0.85186	NA	NA	NA	NA	NA	NA	NA
comp1040434_c0_seq1	0.6114	NA	0.00369	0.17541	0.8957	0.33902	-2.75965	-0.93964	-1.11804	0.8957	-0.42713	-1.57479	1.27942	1.8028	-0.50799	-1.27587
comp104044_c0_seq1	-0.42879	NA	0.01218	-0.14774	-1.25349	-0.3608	-0.61173	-0.36457	0.7295	-1.25349	-0.07935	0.09197	2.03834	1.12333	1.54399	0.83005
comp104047_c0_seq1	NA	NA	-2.17193	NA	-0.9574	NA	NA	NA	NA	-0.9574	NA	NA	NA	NA	NA	NA
comp104054_c0_seq1	-0.6352	NA	NA	0.13726	NA	-3.85681	-2.77243	-0.01854	0.3269	NA	0.851	NA	NA	-1.12259	-2.63629	5.59367
comp104058_c0_seq1	0.02059	NA	0.52817	1.50874	0.18084	-3.831	2.43647	-0.83159	-1.83492	0.18084	1.56165	-0.94777	0.80093	0.12879	0.43818	2.26073
comp104068_c0_seq1	-0.04169	0.4264	0.38506	NA	-0.0094	-0.68228	NA	NA	NA	-0.0094	1.64876	NA	NA	NA	NA	-0.33348
comp10407_c0_seq1	0.10901	1.61051	0.38933	-1.06404	0.3501	1.42883	NA	NA	0.02263	0.3501	-0.2175	-4.75864	-1.59529	-1.711	-0.76025	-0.42377
comp104077_c0_seq1	NA	NA	NA	NA	NA	NA	NA	NA	NA	NA	NA	NA	NA	NA	NA	NA
comp1040885_c0_seq1	-0.02455	1.61051	-0.96629	-0.43552	-0.95741	-1.62741	4.33922	-6e-05	-0.53135	-0.95741	-0.27063	-0.41327	0.10215	-0.35572	-0.75162	2.0236
comp104092_c0_seq1	0.13712	NA	0.00835	2.83685	-1.08654	1.46017	-2.7759	0.87565	-0.39302	-1.08654	0.01339	0.02849	0.75915	-4.08217	2.09279	0.13721
comp104098_c0_seq1	0.23415	NA	0.33189	-0.28894	-0.42429	0.3267	-0.61165	0.18326	-1.21471	-0.42429	0.62457	NA	-1.81276	-2.5682	0.52328	-0.47896
comp1041_c0_seq1	-2.07033	NA	NA	2.42057	NA	-0.04131	-3.35938	NA	-0.93803	NA	0.65712	NA	NA	NA	NA	-0.33344
comp104101_c0_seq1	0.26494	NA	1.45373	0.99093	-1.34111	-0.42799	2.83087	-0.22106	0.26189	-1.34111	-0.27345	0.00614	0.48681	-1.68409	0.62131	0.16073
comp104121_c0_seq1	0.03479	NA	NA	-1.8356	-0.4795	-0.12451	2.82161	2.24181	-1.87481	-0.4795	0.05688	-1.61192	2.03834	1.76223	-0.42185	-1.44233
comp104125_c0_seq1	1.24077	NA	-0.21739	-2.16183	NA	2.29017	NA	-0.37519	NA	NA	-0.97301	-0.49469	NA	NA	0.72865	-0.50018
comp104140_c0_seq1	-0.15756	0.56593	-1.27977	0.26743	NA	-0.05859	NA	1.02417	-0.07772	NA	0.91208	-4.26943	0.08423	-0.85509	1.44363	-0.38474
comp104142_c0_seq1	0.53072	NA	0.00697	2.00804	1.13907	0.54824	-2.75957	0.96756	1.20888	1.13907	0.15168	NA	-0.09543	-4.79473	-1.62106	-2.331
comp104149_c0_seq1	0.27815	NA	0.05596	-0.26907	-1.81252	-0.22261	-0.61177	-0.334	0.45641	-1.81252	-2.82044	1.88005	-0.65491	0.44249	0.79793	1.58688
comp104150_c0_seq1	0.33328	NA	NA	-2.45286	-0.95741	-2.18619	-0.61171	0.13174	-1.05556	-0.95741	1.66714	NA	NA	-1.15917	-1.92786	-0.33372
comp104150_c1_seq1	0.01153	NA	1.58215	2.4206	NA	-0.04128	-0.61165	1.15709	1.4621	NA	0.95052	NA	NA	2.57213	NA	NA
comp104151_c0_seq1	-0.36228	0.53483	1.22875	-2.19205	0.96615	0.59998	-0.6118	-0.41534	-0.52227	0.96615	-0.01126	-3.79946	NA	NA	NA	-0.33358
comp104156_c0_seq1	1.59564	0.56593	-0.07216	1.20532	0.96615	-0.90371	NA	NA	-1.03038	0.96615	0.72998	-3.79946	NA	3.10598	NA	1.6427
comp104160_c0_seq1	NA	NA	-0.26781	2.42055	0.01418	-0.04124	NA	-0.89624	-3.44438	0.01418	NA	-7.13764	NA	-1.93961	NA	1.37356
comp104165_c0_seq1	1.57852	NA	0.16754	-0.54078	-0.1654	-2.85782	-2.75954	0.84847	-2.11132	-0.1654	-0.09918	NA	-0.57919	NA	1.21108	4.99668
comp104171_c0_seq1	-0.2175	NA	-1.22473	-3.19345	NA	-1.07124	-0.61171	-0.42827	-1.9817	NA	-1.15861	-5.97928	NA	NA	-0.42113	2.93417
comp104172_c0_seq1	NA	NA	-1.22141	-0.72982	0.00436	0.59999	NA	1.13102	-1.34356	0.00436	0.95055	-5.01477	-3.90002	NA	NA	-0.33344
comp1041739_c0_seq1	0.77686	NA	1.77056	-4.3514	0.96614	3.95011	-0.61165	-0.76973	2.29107	0.96614	-5.32857	-2.33104	-0.00258	3.7167	0.41601	-4.23252
comp104177_c0_seq1	-0.01442	NA	-0.17666	0.2954	0.00436	3.67681	-2.6545	1.42629	0.58567	0.00436	-1.04236	0.37847	-2.48698	2.72974	2.39466	-2.6296
comp104180_c0_seq1	1.39088	NA	1.06558	0.92323	-1.29219	-1.10137	2.66408	-0.68852	-0.07531	-1.29219	-0.44461	0.16125	1.51083	-1.58016	-2.27248	1.86993
comp104183_c0_seq1	0.31684	NA	NA	0.77372	0.96614	1.87719	-6.38779	0.09098	1.62181	0.96614	-2.1119	-2.44976	-1.30054	2.12059	-2.30413	-0.33354
comp104194_c0_seq1	-0.03717	NA	0.45157	-1.77975	-0.4881	0.55489	-7.52938	0.88852	-3.29059	-0.4881	1.48239	-5.75155	3.61426	3.30243	-2.07654	0.35596
comp104202_c0_seq1	0.37263	NA	NA	-0.2392	0.96615	-0.85901	2.67476	-0.03115	-2.31365	0.96615	0.54277	-1.24878	-0.30882	-0.88914	-2.21369	1.16199
comp104205_c0_seq1	-0.71359	NA	-0.76145	-4.42842	0.96614	1.91486	-2.75957	1.01488	-1.15012	0.96614	-0.97299	-3.55077	NA	6.37657	-1.285	NA
comp104207_c0_seq1	1.70735	0.12072	2.25382	1.68493	-0.24566	-4.09325	-8.37373	1.26837	-1.13236	-0.24566	2.0088	-0.40242	-2.54623	-1.45206	-3.45632	-1.30963
comp104211_c0_seq1	-0.04169	0.56593	2.06587	2.66094	-0.00975	NA	NA	0.86872	NA	-0.00975	2.73352	NA	4.02805	NA	NA	NA
comp104216_c0_seq1	1.41197	NA	0.339	-2.90555	NA	-0.60571	NA	NA	-1.8896	NA	NA	NA	-0.96759	NA	NA	-0.33369
comp1042372_c0_seq1	-0.56918	NA	-2.41106	-1.27374	-0.9574	-2.00587	NA	3.6663	-1.61103	-0.9574	NA	-3.91972	0.41829	-5.08798	0.62284	-0.33359
comp104242_c0_seq1	0.9201	NA	NA	NA	NA	-2.03384	-0.30039	NA	NA	NA	-0.48485	NA	-0.16632	-3.40222	2.03169	3.02646
comp104251_c0_seq1	0.59259	NA	-0.56481	0.53826	-0.08765	-0.5586	-2.75962	1.26987	-0.16202	-0.08765	0.97137	-0.31121	1.02846	-2.02926	1.03689	-1.93793
comp104268_c0_seq1	-1.13133	NA	NA	-0.37701	NA	0.18613	-4.08803	0.71345	-0.76989	NA	0.63763	NA	-2.89252	-1.35385	-3.75772	4.2856
comp104277_c0_seq1	-0.08468	NA	-1.04059	-0.96126	-0.57674	-0.4769	3.14802	-0.68824	-1.35232	-0.57674	0.14304	1.98139	0.67163	1.6523	-0.15443	0.42344
comp10429_c0_seq1	-0.70152	NA	1.63964	2.65829	NA	1.92731	-0.61171	0.91573	-1.82156	NA	-1.84182	-0.99776	3.03169	-4.60157	-1.285	2.24825
comp104295_c0_seq1	1.19167	NA	NA	1.36724	0.00438	0.21824	-0.64289	-0.50245	NA	0.00438	NA	1.38133	NA	NA	-3.4694	-0.7811
comp104298_c0_seq1	-0.21579	0.39241	-0.54165	1.63942	-0.95741	0.16658	-5.92733	-0.04297	-0.26577	-0.95741	0.60388	NA	-5.15579	-0.0105	0.64167	0.33884
comp104300_c0_seq1	0.08292	NA	-1.11099	0.65574	0.66732	-0.00855	-5.08794	-0.88678	0.28688	0.66732	0.42539	NA	0.65778	2.6201	1.19206	0.42009
comp104321_c0_seq1	-0.21175	NA	-0.57979	0.35399	-2.84287	-0.91267	-0.61167	0.46786	0.1159	-2.84287	-1.04521	-0.2446	0.34849	0.85526	-1.21792	-0.13664
comp104325_c0_seq1	NA	NA	0.63955	NA	-0.95741	-0.0412	NA	NA	-1.03005	-0.95741	1.23945	NA	-2.89252	NA	NA	NA
comp104337_c0_seq1	0.52306	1.63592	NA	-2.19208	1.81889	-4.68304	5.11599	0.23331	-3.55215	1.81889	0.75053	NA	-0.26068	1.80101	-3.14063	4.31806
comp104340_c0_seq1	0.5995	2.22557	0.63829	-2.50134	NA	0.59993	-2.75954	-0.34742	NA	NA	0.62234	NA	2.03834	NA	1.44363	-0.33353
comp104342_c0_seq1	-0.73207	NA	-0.93067	-2.50136	NA	-3.0091	-3.33447	1.89956	-0.52068	NA	1.66595	NA	NA	2.48702	-0.6723	-0.33365
comp1043563_c0_seq1	-0.85355	NA	NA	NA	-0.95741	0.38656	-0.61165	NA	0.52521	-0.95741	NA	0.79436	NA	NA	-5.0385	-0.33346
comp104357_c0_seq1	0.59603	NA	-0.69658	0.30745	2.46594	-1.21961	-0.9041	1.43295	0.32162	2.46594	-0.76864	NA	0.88763	0.24464	-0.05208	-0.34712
comp104360_c0_seq1	0.67112	1.31956	0.64887	2.25768	0.34451	0.17326	-0.6117	-0.64905	0.0001	0.34451	-0.40101	-2.59312	-0.57919	-1.20164	1.49251	0.05629
comp104368_c0_seq1	0.80327	NA	0.63829	3.41488	-3.21134	-3.83755	-0.11327	-0.88579	0.62182	-3.21134	1.71529	-2.80556	0.8002	-2.02926	NA	2.6204
comp104369_c0_seq1	-0.36228	0.85938	NA	NA	NA	NA	NA	NA	-3.25722	NA	NA	NA	NA	NA	NA	NA
comp104369_c1_seq1	NA	0.22289	0.16989	NA	0.6286	NA	NA	NA	-4.23821	0.6286	NA	NA	NA	NA	NA	NA
comp104377_c0_seq1	0.03782	NA	1.17925	-1.44531	-0.98326	-1.32802	2.91642	-0.36617	-0.67738	-0.98326	-1.1494	-0.35958	-0.16632	0.88887	-1.51386	0.59825
comp104378_c0_seq1	-1.75821	NA	-0.26945	3.65613	NA	-1.84632	-4.32341	1.21327	-0.33507	NA	1.3264	-3.59007	-1.16517	4.01389	0.0962	0.71175
comp104394_c0_seq1	-0.48289	0.7251	NA	-2.9577	0.00438	-1.53518	0.28941	-0.05746	NA	0.00438	-0.25664	NA	NA	-0.13431	-1.3437	3.98212
comp1044_c0_seq1	0.18144	NA	0.07075	NA	NA	-0.21641	-4.73543	NA	NA	NA	NA	NA	-1.18349	-6.98412	1.86193	-5.64261
comp104412_c0_seq1	0.04884	0.42503	1.76475	1.31179	1.03188	-2.11644	5.63441	0.02903	-1.17085	1.03188	0.91234	2.45378	0.06846	-0.12136	-0.99283	1.92244
comp104415_c0_seq1	0.5995	NA	-0.61868	1.72088	-1.57137	1.25223	-0.61165	-2.10485	0.3269	-1.57137	1.65841	NA	2.299	-1.93961	NA	-0.33359
comp104420_c0_seq1	0.27891	1.61051	-0.32869	0.90197	2.40545	1.25236	-2.75954	1.36139	-0.08219	2.40545	1.46209	-3.16907	-0.10051	4.71892	2.956	-4.26654
comp104421_c0_seq1	-0.99966	0.56593	1.79854	0.47025	0.0394	0.03389	-4.63232	-1.40247	3.96932	0.0394	-1.76949	-8.72059	-1.36299	4.87038	0.17925	4.88669
comp104440_c0_seq1	-0.3548	NA	-0.83482	3.41675	0.73047	-1.07749	1.20317	0.77701	1.25911	0.73047	-0.31788	NA	NA	-0.44573	-1.94425	-0.00024
comp104449_c0_seq1	NA	NA	NA	NA	NA	NA	NA	NA	NA	NA	NA	2.65267	NA	NA	NA	NA
comp104459_c0_seq1	-0.80596	NA	0.95139	-1.45508	-1.47634	1.167	-2.75954	0.22502	-1.34062	-1.47634	1.45692	0.18854	0.68955	-1.82305	NA	-0.45362
comp10446_c0_seq1	-0.04169	0.56593	NA	NA	0.96615	0.61482	-0.61174	-1.08935	NA	0.96615	-0.39726	NA	2.03834	3.15505	0.20855	2.58024
comp104463_c0_seq1	0.02543	0.65898	-0.5742	0.19878	-0.98203	-0.16466	-0.86313	0.72905	1.46381	-0.98203	-0.94558	-1.56336	-0.15956	1.02194	-0.13964	0.71536
comp104487_c0_seq1	0.5023	NA	-1.8592	0.50025	-0.19429	-2.26635	-2.88939	0.60344	-1.78822	-0.19429	1.01122	-2.20692	3.17408	1.72252	1.81657	1.71171
comp104497_c0_seq1	0.06284	0.10636	0.48935	1.4933	-0.16602	0.31615	-2.76524	0.09395	-0.85513	-0.16602	-0.09401	-1.63684	0.34945	0.7353	-2.47343	0.01162
comp104505_c0_seq1	0.18638	NA	1.46533	-0.08059	0.38402	-1.4355	-5.22275	-0.48428	-2.81566	0.38402	-0.33956	2.51112	0.98635	-2.53119	-3.97649	1.11871
comp10451_c0_seq1	1.02447	NA	-0.11409	3.07799	1.45546	1.94678	-0.61165	0.06816	0.26994	1.45546	0.73823	NA	2.03834	-0.8932	2.42411	-6.05144
comp104515_c0_seq1	0.16041	0.63689	0.25086	-0.86356	-1.17824	1.58024	-0.75904	0.00591	-0.6974	-1.17824	-0.15173	-0.33247	0.52639	-0.44411	1.34603	-1.44382
comp104518_c0_seq1	-1.2358	NA	1.24904	1.58003	0.02913	2.68826	-0.61174	-0.71148	-0.76136	0.02913	-0.3394	-2.65503	-1.22338	-0.64419	0.18587	-1.2284
comp104530_c1_seq1	NA	NA	NA	3.54513	0.00438	0.59994	NA	NA	1.27234	0.00438	-0.01124	NA	2.03834	NA	NA	1.42118
comp104531_c0_seq1	-0.40862	0.85938	0.63829	2.66094	0.00436	0.67604	-0.30038	0.06555	NA	0.00436	NA	NA	2.03538	NA	4.80731	-0.02315
comp104532_c0_seq1	0.20605	0.56593	3.03823	-0.80748	-1.10651	0.97307	0.69394	-1.98614	2.03402	-1.10651	-1.5224	-3.06345	-3.22743	0.54207	2.26504	-1.76431
comp104533_c0_seq1	0.6145	NA	NA	-1.26816	-1.64195	0.70332	-2.01876	0.1128	-2.993	-1.64195	-0.11147	NA	-1.21478	-2.53643	-1.19052	-0.62096
comp104540_c0_seq1	0.18093	NA	0.63322	0.72032	0.01886	0.99838	2.83086	-0.15126	-0.64448	0.01886	-0.36548	-5.10457	1.56353	-0.06186	0.44096	-0.26921
comp104548_c0_seq1	0.27891	0.56593	1.05724	-0.03428	-0.95741	-0.04122	NA	-2.24968	NA	-0.95741	1.88773	NA	-2.89252	NA	NA	-0.33343
comp10455_c0_seq1	0.483	NA	NA	NA	NA	0.59998	-0.61165	NA	1.25783	NA	NA	NA	NA	-2.02926	NA	NA
comp104555_c0_seq1	-0.26562	NA	NA	NA	0.00436	2.68133	-1.90376	0.06555	1.27234	0.00436	NA	NA	NA	NA	-2.00915	-7.53845
comp104561_c0_seq1	0.30843	NA	NA	NA	0.51034	-1.47627	-0.61165	0.49174	-0.09768	0.51034	0.95055	1.31733	1.11527	-3.81327	-2.2404	1.78122
comp104562_c0_seq1	-0.31508	NA	1.58215	0.00671	1.02354	-0.51403	-4.32906	-0.18557	0.40426	1.02354	-1.99527	NA	-0.13234	-2.16604	-3.36924	-1.59105
comp10457_c0_seq1	-0.80387	1.69206	NA	-0.85604	1.48547	0.9602	-2.78455	-0.58897	-0.4052	1.48547	1.06799	NA	-2.89252	NA	NA	-4.06743
comp104570_c0_seq1	-0.0242	NA	NA	0.06234	NA	0.03624	-0.15125	-0.27126	-0.15399	NA	0.75046	-1.88248	0.02775	-0.8378	0.42051	0.07723
comp104575_c0_seq1	0.90787	NA	0.47339	-1.26197	-0.60925	-0.52207	3.83083	-0.14605	-1.8883	-0.60925	0.3662	3.78295	0.32625	-2.98355	-1.85786	-0.65003
comp10459_c0_seq1	-1.41083	NA	-1.98602	4.17165	NA	1.11339	-0.61173	0.49093	0.12525	NA	0.39601	NA	-0.23291	-0.04059	NA	-0.33351
comp104590_c0_seq1	-0.36228	NA	0.05078	1.16269	-0.9933	-0.04122	-4.92195	-0.30459	-0.28373	-0.9933	-0.57784	-3.94407	1.23896	NA	3.37031	-0.33365
comp104595_c0_seq1	-1.23474	NA	-0.97261	-0.27536	0.00438	-0.04126	-5.75372	-0.82229	0.53971	0.00438	0.30013	3.3341	0.23898	NA	NA	-0.33348
comp104604_c0_seq1	-0.04669	NA	NA	0.4336	-0.9574	-0.26896	-1.12433	NA	-0.37766	-0.9574	-0.02257	NA	0.19167	-3.51832	-1.08695	-3.4616
comp104607_c0_seq1	-0.53748	NA	2.69091	0.98145	-0.57324	2.69785	-5.24067	0.58526	1.83047	-0.57324	1.95483	-4.3778	1.11527	2.99452	2.09941	-3.77726
comp104610_c0_seq1	0.11031	NA	0.33248	1.09581	0.8816	0.22153	0.58271	0.40115	-0.16386	0.8816	3.64808	NA	4.10394	0.42232	-2.2092	5.41759
comp104613_c0_seq1	-0.5437	NA	-0.6439	-1.24506	-0.31134	2.27643	-2.75961	-0.07229	-0.10643	-0.31134	-2.08964	-3.25081	-3.15836	1.6801	0.20781	-3.94355
comp104616_c0_seq1	-0.42366	NA	-0.81374	1.49263	0.91587	0.42199	3.74799	-0.06184	-1.48704	0.91587	0.09972	-1.53245	2.03834	2.25977	0.61466	3.25379
comp10463_c0_seq1	0.00764	NA	NA	0.54249	0.96615	0.3069	-2.75961	-0.44967	-0.2491	0.96615	-1.40473	4.6806	3.80408	-1.90545	-2.88986	-0.35722
comp104633_c0_seq1	-0.44211	0.23958	-0.48689	1.41493	-0.7025	-0.75602	-0.61165	0.77023	0.62603	-0.7025	-0.35589	NA	2.03834	0.22966	-1.58437	2.37233
comp104638_c0_seq1	0.44603	NA	NA	0.3712	0.00436	-3.27922	-5.34674	NA	NA	0.00436	2.16755	NA	-1.35186	NA	-1.83298	2.76282
comp104643_c0_seq1	-0.49965	NA	-0.2938	1.34017	-0.25501	1.01657	-4.32178	-1.17799	1.58862	-0.25501	-1.23288	NA	-0.5536	1.96837	0.2197	-3.6448
comp104646_c0_seq1	-0.04168	1.12213	-1.22403	NA	NA	0.64593	-3.35945	-1.41656	-0.98698	NA	0.85736	-4.26943	2.299	1.71315	-1.285	2.5918
comp104656_c0_seq1	NA	NA	-1.22473	NA	NA	NA	NA	NA	NA	NA	NA	NA	NA	NA	NA	NA
comp104668_c0_seq1	0.23877	NA	0.78558	-2.03725	0.22359	0.64499	-5.22445	0.17767	0.2634	0.22359	-0.35875	0.24008	-2.53652	-0.44794	0.08767	-0.34919
comp104673_c0_seq1	-0.2095	NA	0.5168	NA	NA	1.52015	-5.57371	-0.20973	0.24624	NA	-0.70414	NA	-0.75597	-0.98072	NA	-5.55454
comp104682_c0_seq1	0.27891	0.33765	-1.07889	5.08877	-0.84732	-0.41857	2.83092	0.24054	-1.68492	-0.84732	-1.00562	NA	-0.56696	NA	NA	-1.0393
comp104684_c0_seq1	-0.0436	NA	-0.2905	0.09726	0.01792	-2.80409	-0.61165	0.18266	-2.67934	0.01792	1.04964	1.80054	-2.89252	-1.93961	NA	-0.37643
comp10469_c0_seq1	-0.31939	-0.15559	NA	-0.28042	3.38146	-0.25185	-0.61173	-1.06602	-0.06567	3.38146	0.40437	NA	1.00449	-0.23286	-1.285	1.38447
comp104702_c0_seq1	0.1465	NA	-0.11733	2.92246	0.74961	-1.58959	-4.59973	-0.41285	-0.90128	0.74961	1.53279	-1.88551	3.17408	1.31372	-0.46859	0.25437
comp104710_c0_seq1	0.71421	NA	-0.41877	-4.18699	0.40722	0.15388	0.11428	0.22928	-2.2628	0.40722	-0.97302	0.97185	-0.23291	2.84941	2.29968	0.20069
comp104714_c0_seq1	-0.86931	NA	-1.22473	NA	NA	-1.47304	-2.75957	0.95725	0.26574	NA	0.53469	NA	3.03169	NA	-1.83298	2.61345
comp10472_c0_seq1	0.60137	NA	1.76747	-1.4303	0.00259	3.56633	-0.6117	-0.42977	-0.67929	0.00259	-0.49116	-0.48398	-2.67479	0.95437	2.19851	-1.67202
comp104724_c0_seq1	0.34472	0.55507	0.51881	2.24388	-1.01568	-1.07621	-1.16638	0.12175	-1.66245	-1.01568	0.3084	-1.34595	-1.8664	1.94443	-0.67425	-0.90118
comp104725_c0_seq1	-0.68288	NA	0.44379	1.57266	0.74594	-0.04123	NA	-2.9902	-2.98605	0.74594	2.13198	-2.24802	1.13204	NA	NA	-0.33346
comp104726_c0_seq1	0.56428	NA	1.65172	0.67915	0.20374	0.38795	0.68295	-0.77556	-0.71855	0.20374	0.64308	-4.75864	0.58876	-0.19344	-1.74483	0.26181
comp104729_c0_seq1	-0.68481	0.39961	1.58215	3.54332	NA	-1.10727	NA	-1.70766	-0.15399	NA	1.88314	NA	-2.03911	NA	-1.48764	3.24292
comp10473_c0_seq1	-0.4342	NA	NA	1.08425	0.96615	0.40571	-2.75957	-0.37759	0.70309	0.96615	0.95056	NA	NA	-4.91576	NA	-1.39658
comp104732_c0_seq1	-0.29413	NA	-1.91269	3.54491	0.27422	0.69417	-0.61165	2.17731	-0.66419	0.27422	0.81648	1.88005	4.41129	-1.92588	1.68453	1.75349
comp104739_c0_seq1	0.5995	NA	3.96023	-0.93644	-0.95742	-0.04122	-4.01275	-1.3908	3.53534	-0.95742	-0.52227	NA	-2.37428	NA	2.46862	-2.21392
comp104745_c0_seq1	1.08757	NA	0.63872	4.84247	1.48874	2.02352	0.68298	-0.65162	0.52578	1.48874	0.26178	-0.71831	0.12881	-3.6192	3.46449	-1.36186
comp104748_c0_seq1	-0.07003	NA	-3.19596	NA	0.00436	NA	NA	2.31211	-0.95085	0.00436	0.38161	-8.39591	NA	-2.02926	-4.98502	NA
comp104757_c0_seq1	-0.16265	NA	-1.77629	-1.73061	0.00436	-0.14753	2.8309	1.5449	-0.92345	0.00436	-0.01855	-1.07584	-0.23291	1.71315	-2.80541	0.0077
comp1047593_c0_seq1	0.32768	0.66618	NA	NA	NA	1.64451	-0.61167	0.37134	-0.88625	NA	1.45115	NA	NA	-0.94314	-7.22296	6.23705
comp10476_c0_seq1	-0.16727	0.63689	NA	2.4206	NA	0.41351	-0.30698	0.90548	-0.62849	NA	0.42446	NA	3.17408	0.0045	5.84069	3.33075
comp1047664_c0_seq1	-0.19539	NA	NA	4.54543	0.96614	1.38545	-0.61166	-0.62699	0.77653	0.96614	-1.81114	NA	3.03169	-4.07917	NA	-0.33352
comp1047715_c0_seq1	-0.5584	0.84482	NA	-2.50134	0.00435	NA	NA	NA	1.93107	0.00435	NA	NA	-0.17187	NA	NA	NA
comp1047757_c0_seq1	-0.36228	-0.18603	-0.36298	0.09723	-1.42536	-0.04129	NA	-1.61539	0.50457	-1.42536	-0.17674	NA	2.03834	NA	NA	-3.09076
comp104778_c0_seq1	0.39554	0.75061	0.63829	NA	-0.17098	-0.04131	-0.61166	1.28202	-0.27951	-0.17098	NA	-3.04312	NA	-1.72088	-1.4034	-3.79908
comp104779_c0_seq1	-0.03158	1.89868	NA	0.19391	0.43825	-0.46204	0.70385	-0.0929	-2.17348	0.43825	-0.04187	NA	-0.17666	-6.23562	0.83401	-0.75231
comp104789_c0_seq1	0.97661	NA	NA	2.9498	-0.67856	-1.14428	-3.35944	-0.41534	-0.54258	-0.67856	1.06947	NA	NA	-0.17831	-4.88021	2.09018
comp104800_c0_seq1	NA	NA	NA	NA	NA	NA	NA	NA	NA	NA	NA	NA	NA	NA	NA	NA
comp104800_c1_seq1	NA	NA	NA	NA	NA	NA	NA	NA	NA	NA	NA	NA	NA	NA	NA	NA
comp104801_c0_seq1	0.21558	1.61051	-0.6863	2.66093	NA	2.09272	-1.68176	-1.17271	-3.1242	NA	0.91125	NA	0.41212	NA	-5.36886	-6.84709
comp1048037_c0_seq1	-0.06244	NA	0.14636	0.32263	0.36073	1.85493	-2.49312	0.16174	0.712	0.36073	-0.13456	-2.37096	1.26523	-0.29485	-0.65814	-1.54213
comp104806_c0_seq1	NA	1.85499	0.14163	-0.76815	0.01847	NA	-3.35938	NA	-5.87731	0.01847	0.26693	NA	1.61064	NA	NA	NA
comp1048074_c0_seq1	-0.11025	NA	-2.77845	-0.31567	0.00436	0.70729	0.013	-1.73586	1.04457	0.00436	-0.36405	-7.39962	-1.28043	1.1588	1.11197	-0.94056
comp1048075_c0_seq1	0.4325	NA	NA	-2.19205	NA	-2.36209	NA	-0.88792	-0.54867	NA	1.92733	NA	NA	2.49214	NA	2.41262
comp104809_c0_seq1	-0.91714	1.61051	0.38868	-0.90664	-0.41135	-0.04117	-5.65415	1.79371	1.77306	-0.41135	-0.24291	NA	-1.1939	4.30454	NA	1.37329
comp104813_c0_seq1	-0.16347	1.61051	0.62813	4.08791	-0.49733	0.72025	-3.77271	-0.2191	1.13071	-0.49733	1.44912	NA	3.80408	-1.5314	2.45018	0.72447
comp1048134_c0_seq1	NA	NA	-1.22473	NA	5.28969	-0.0412	NA	NA	NA	5.28969	NA	NA	3.71276	NA	NA	NA
comp104816_c0_seq1	0.24156	0.98357	1.04151	-0.79968	1.48537	-1.85295	-0.61167	0.88393	-1.1891	1.48537	-0.01124	-4.10248	-0.10051	2.64404	-2.99045	-3.21438
comp10482_c0_seq1	1.83749	NA	-1.55468	-1.02328	NA	-3.67309	-0.61166	-0.76513	0.85303	NA	-0.01121	NA	NA	4.31208	-0.76553	-0.33375
comp104820_c0_seq1	-0.31623	NA	-0.75775	0.1123	NA	1.17162	1.4992	-0.77521	-0.5919	NA	-0.66982	NA	0.30703	5.15048	-4.97355	-0.0049
comp104824_c0_seq1	-0.36228	2.0675	-0.88796	-3.23312	-0.86204	4.62228	-2.75961	-0.75891	1.69034	-0.86204	0.95125	NA	-2.70641	NA	NA	-4.80698
comp1048294_c0_seq1	-1.73915	NA	-1.56041	NA	1.84855	NA	NA	NA	NA	1.84855	NA	NA	NA	NA	NA	NA
comp10483_c0_seq1	0.01366	NA	NA	0.07479	0.96614	0.20649	-2.55714	-0.78265	NA	0.96614	0.25132	NA	0.02775	-0.22743	-1.99579	-1.66797
comp1048339_c0_seq1	0.09012	NA	NA	0.53243	0.57387	0.39204	NA	0.08724	0.91669	0.57387	-1.57048	NA	-1.09798	-0.15035	-6.55553	-9.82947
comp1048351_c0_seq1	NA	NA	NA	NA	NA	NA	NA	NA	NA	NA	NA	NA	NA	NA	NA	NA
comp10485_c1_seq1	0.25076	NA	1.81773	3.651	0.98287	2.46393	0.08316	-0.94464	-0.72118	0.98287	-0.43258	NA	0.75915	NA	NA	-2.09677
comp104851_c0_seq1	-0.63228	0.12072	2.06848	1.53971	0.4772	1.28152	-0.67259	0.11579	-0.05001	0.4772	0.31009	-2.83353	-1.68959	-0.69371	-0.7481	-1.39068
comp104853_c0_seq1	0.18293	0.87024	1.79127	-1.80332	0.2461	-1.82533	1.71033	-1.19699	-1.23894	0.2461	0.79022	-3.02926	-0.62308	1.53728	0.85181	-0.57592
comp1048585_c0_seq1	-0.21399	NA	0.27879	-2.03328	-2.46214	-2.77365	3.73872	-0.56284	1.32387	-2.46214	-0.71541	-3.84664	-1.49329	-0.21343	-0.37114	1.27935
comp104859_c0_seq1	0.88644	1.08931	-1.22473	0.13117	-0.44304	1.90048	-2.75957	-0.12543	NA	-0.44304	0.25079	NA	-5.08654	0.31564	2.37241	-3.77722
comp1048700_c0_seq1	-0.40014	NA	NA	1.00724	0.96615	-1.28073	4.41591	1.06247	-2.52442	0.96615	0.67902	NA	2.35304	1.02174	-3.48863	-0.77763
comp104871_c0_seq1	-0.79958	NA	1.17266	-1.05098	1.46675	1.2865	-0.61168	-0.30248	-1.76122	1.46675	0.92617	-1.29422	-0.96759	-0.4788	-1.91522	-0.33367
comp104879_c0_seq1	0.51335	NA	NA	NA	NA	-0.04139	-7.55293	NA	NA	NA	0.56623	NA	-1.1253	0.69756	NA	-6.73706
comp104883_c0_seq1	-0.28212	NA	0.06048	-2.63499	0.02788	0.52663	-5.75868	-0.45643	0.95076	0.02788	-0.18947	1.34533	0.13707	-4.61265	0.47255	-3.16191
comp104887_c0_seq1	0.31154	0.11352	-2.21158	1.51727	0.0043	-2.31394	3.88202	0.84596	-0.41233	0.0043	-0.10686	0.37847	0.12871	0.95266	0.20905	2.23721
comp1048872_c0_seq1	0.60674	NA	NA	NA	0.9264	1.18924	-0.61167	NA	1.2967	0.9264	-2.80955	NA	-3.53721	NA	-0.26067	-4.21405
comp104897_c0_seq1	0.1414	NA	0.94091	NA	NA	-0.81692	-2.75962	-0.15226	0.43435	NA	-0.3107	NA	-1.40232	0.43718	-1.285	-2.58353
comp104898_c0_seq1	-0.10662	NA	NA	0.05974	1.8726	0.85583	-2.75954	-0.94615	-0.04436	1.8726	0.74901	NA	0.10215	-1.38536	-0.06351	-0.29156
comp104899_c0_seq1	1.12423	NA	-0.30156	-0.4484	0.04711	1.21867	-0.61165	1.09431	-0.19251	0.04711	-0.27419	-3.64599	4.24127	-1.23929	-0.97112	-0.44385
comp1048991_c0_seq1	0.09293	NA	NA	-1.50297	NA	0.35685	-0.61168	-1.17775	-0.41894	NA	-2.42777	-4.26943	0.58401	2.72597	0.69888	2.07947
comp1049_c0_seq1	-1.16286	NA	-1.66799	4.48098	1.89028	-0.39209	-2.75957	0.87048	0.15918	1.89028	2.30475	NA	NA	1.72252	0.24033	2.95695
comp1049002_c0_seq1	-0.54449	NA	1.52538	1.31126	0.96897	0.05424	-2.90403	-0.39881	-0.53692	0.96897	0.09186	1.97147	-1.40232	0.29753	2.75097	0.89798
comp104908_c0_seq1	0.2155	NA	2.30121	-0.20665	-0.8231	0.63712	2.83087	-0.35803	1.69901	-0.8231	-0.32442	-0.15017	0.90178	-0.91266	-0.01781	0.05028
comp104911_c0_seq1	-0.10781	0.83396	1.69471	-0.24732	0.96614	-0.94031	-0.64424	-0.53461	1.29338	0.96614	0.68929	NA	-1.03254	-0.03082	-2.28675	1.00919
comp104919_c0_seq1	-0.31989	NA	0.6913	-0.06031	-1.01605	3.55274	-7.00866	0.15837	-0.02214	-1.01605	-0.52034	-3.43071	-0.31853	3.05213	-0.34608	-0.33354
comp10492_c1_seq1	-0.99466	NA	NA	2.65963	-0.49215	-0.31352	-0.61171	-0.31174	0.19234	-0.49215	0.14328	NA	2.03834	0.95593	NA	1.00683
comp104922_c0_seq1	0.0723	1.50267	-0.26874	-1.05651	NA	-0.79677	-0.90742	1.41043	-0.3813	NA	0.32767	NA	-0.05464	0.03484	0.48573	1.14675
comp104925_c0_seq1	0.19453	NA	-2.5879	-0.77888	-0.9574	-3.75927	3.44179	-1.5337	-4.09079	-0.9574	-0.08148	-1.04968	2.299	6.12877	-4.1546	1.21777
comp104926_c0_seq1	1.40999	NA	1.24073	2.97721	1.00947	3.36922	0.65759	-0.40542	1.82959	1.00947	-0.52261	2.05206	NA	0.45863	0.48184	-2.24045
comp1049266_c0_seq1	0.27891	NA	-1.04376	NA	-1.47681	NA	-2.75954	NA	-2.00541	-1.47681	0.66539	0.25374	-0.16226	NA	NA	NA
comp104936_c0_seq1	0.0321	NA	NA	0.72679	NA	4.64573	NA	NA	-0.63054	NA	NA	NA	NA	NA	3.9762	-1.97261
comp104945_c0_seq1	-0.10438	NA	0.63671	-1.23558	-2.81493	-1.21789	2.67216	-0.21024	-0.98583	-2.81493	1.01276	1.25065	0.58876	0.05288	-1.00942	1.67142
comp1049465_c0_seq1	NA	NA	NA	NA	NA	NA	NA	NA	NA	NA	NA	NA	NA	NA	NA	NA
comp1049471_c0_seq1	-0.05908	NA	-0.45066	-0.64888	1.50279	2.2545	NA	0.57029	1.63829	1.50279	-1.84457	0.58174	1.11527	-0.75892	-3.62757	-1.89367
comp104948_c0_seq1	0.02242	NA	NA	1.09967	0.00436	0.01645	1.68293	-0.73612	0.4667	0.00436	0.61788	NA	-1.40705	-0.09523	-0.22121	1.01525
comp1049524_c0_seq1	-0.83413	0.55507	1.28601	0.09725	0.96615	2.19433	-0.61173	-0.98013	-0.72009	0.96615	-2.44359	0.25374	3.30478	-4.13806	4.27952	-1.49967
comp104954_c0_seq1	0.05935	NA	-0.04133	-1.3893	-0.85997	0.48532	-0.61175	-0.25175	0.73418	-0.85997	-2.12218	-6.888	3.17408	-1.20994	0.90058	1.63797
comp104956_c0_seq1	0.21043	NA	0.37845	NA	-0.01589	0.53734	-4.56648	0.48149	0.25646	-0.01589	0.00749	NA	0.18007	0.20686	0.87545	-5.0681
comp1049589_c0_seq1	-0.5114	NA	0.28162	0.09722	0.55134	-0.36431	NA	0.3993	-0.07996	0.55134	-0.01128	NA	-2.89252	-0.623	NA	5.00751
comp104964_c0_seq1	1.29695	NA	0.66698	-3.86088	-1.78373	-0.36091	3.83086	1.33712	-1.52344	-1.78373	-0.98919	-2.872	0.03564	-1.01525	-2.84837	3.37667
comp1049686_c0_seq1	-0.49958	0.56593	0.24644	0.26068	-0.00122	-0.04114	NA	-2.70399	-1.66097	-0.00122	-0.01121	NA	2.299	NA	NA	-0.33357
comp104975_c0_seq1	-0.76379	NA	0.2829	0.36962	-0.8576	0.77489	-0.61171	-0.15832	0.65549	-0.8576	-0.30505	NA	NA	-1.9806	2.41836	-2.73883
comp104979_c0_seq1	0.26846	NA	1.58215	1.09521	-0.95741	0.51994	-6.60986	0.42415	1.47538	-0.95741	1.92249	-4.26943	-2.74488	5.01511	1.52825	-1.20825
comp1049804_c0_seq1	-0.32345	1.61051	-2.80705	3.66632	0.9133	0.92416	-2.82635	-1.08649	0.12867	0.9133	-0.78991	NA	3.03169	-0.64212	1.67751	-1.6878
comp104981_c0_seq1	NA	NA	NA	NA	NA	NA	NA	NA	NA	NA	NA	NA	NA	NA	NA	NA
comp104982_c0_seq1	-0.28219	NA	NA	NA	NA	NA	1.64138	NA	-0.69158	NA	2.81707	NA	0.03564	2.68122	NA	NA
comp104982_c1_seq1	-0.17628	NA	NA	NA	NA	NA	0.10003	NA	-0.15399	NA	0.14101	NA	2.299	-0.28885	NA	NA
comp104984_c0_seq1	0.27891	NA	-0.98606	-2.20077	1.48157	0.94833	3.83089	0.48063	-0.22595	1.48157	-1.80922	NA	NA	NA	NA	-2.09787
comp1049918_c0_seq1	-0.92322	NA	-1.21579	NA	NA	0.91301	-0.61165	NA	NA	NA	1.512	1.01895	NA	NA	-5.10707	0.62997
comp1049979_c0_seq1	-0.04169	NA	0.5168	3.54457	NA	4.03361	-3.74291	0.16831	0.73442	NA	-1.68828	NA	0.21868	NA	-2.23595	-4.53091
comp105003_c0_seq1	NA	1.09366	NA	NA	0.00436	0.59998	-0.61171	NA	-2.92743	0.00436	NA	NA	NA	NA	NA	-0.33343
comp105005_c0_seq1	-0.68478	NA	NA	-0.64973	0.96616	-0.48238	-2.75967	-0.67099	-2.08212	0.96616	2.99753	-3.1482	-0.57919	-0.04059	-1.99375	0.33428
comp1050133_c0_seq1	NA	NA	NA	NA	NA	NA	NA	NA	NA	NA	NA	NA	NA	NA	NA	NA
comp105021_c0_seq1	-0.64163	0.23268	-0.30691	NA	-0.5432	0.08171	NA	NA	1.09571	-0.5432	3.30256	NA	NA	NA	NA	-4.89663
comp105024_c0_seq1	0.91117	NA	0.63829	0.9953	-0.60533	-0.89681	-4.94303	NA	0.81294	-0.60533	0.09032	-0.07206	1.24991	-0.57437	NA	-1.351
comp105034_c0_seq1	1.79014	NA	2.12232	-3.35425	-0.95742	-0.0412	NA	-0.75542	NA	-0.95742	3.88188	NA	-4.37272	2.62231	3.75266	-0.33355
comp105038_c0_seq1	0.41409	NA	-0.3086	-0.30354	0.67001	0.2379	0.6471	-0.22248	0.95209	0.67001	-0.96782	-1.70585	-2.83819	-0.68308	1.4058	1.09282
comp105043_c0_seq1	-0.01649	NA	3.06799	-0.05654	0.75569	-2.74551	2.46226	0.3535	0.38816	0.75569	3.27876	-1.59426	0.98449	0.92094	0.77858	4.06447
comp1050455_c0_seq1	0.94596	1.63592	1.08209	0.14349	0.11629	1.41994	-0.61174	-0.19697	0.48818	0.11629	-0.29045	-0.32763	-0.56009	-0.47376	-1.91043	-0.98537
comp105050_c0_seq1	0.27038	1.63592	NA	-4.35244	NA	0.51793	-1.77993	0.27096	1.22764	NA	-0.20656	NA	-0.23291	-0.77863	1.10055	0.56815
comp105051_c0_seq1	0.31493	NA	0.01351	0.2028	-1.94063	1.1959	-0.63679	0.76689	-0.62651	-1.94063	0.62536	-0.87237	3.71276	0.73077	0.85154	-1.993
comp105056_c0_seq1	0.31547	0.352	-3.11379	0.50174	-0.95742	-4.21937	2.64305	-1.51093	-2.32361	-0.95742	2.43076	-3.90667	0.75915	2.14113	-0.53047	2.7477
comp10506_c0_seq1	NA	NA	NA	NA	NA	1.4086	0.70193	NA	NA	NA	NA	NA	-0.00855	NA	-1.90166	-5.7388
comp105062_c0_seq1	-0.10618	NA	3.5577	0.07862	-1.67033	12.8933	-6.27418	-2.5817	7.42348	-1.67033	-2.14086	-4.69286	-1.84222	6.29621	6.88609	5.01615
comp105065_c0_seq1	-0.27317	1.63592	NA	-1.65169	NA	-0.04122	-2.75957	1.19294	-0.24311	NA	2.62369	-7.78421	1.23896	-2.04193	-5.37663	-2.09309
comp105071_c0_seq1	0.02182	NA	-0.81934	-0.03631	0.86071	-0.66641	-3.75357	1.81683	-1.13684	0.86071	0.03207	1.94273	0.88763	0.55754	0.04745	0.56411
comp105081_c0_seq1	-0.68288	0.44849	1.62986	0.09725	0.3209	-0.68228	NA	NA	-1.46165	0.3209	3.30289	NA	NA	NA	NA	NA
comp1050843_c0_seq1	0.08358	NA	-0.29367	NA	-0.13107	0.93014	-4.77307	2.12605	-0.81483	-0.13107	1.28148	NA	3.71276	-1.0902	NA	-7.07135
comp105089_c0_seq1	0.53199	NA	-0.27378	0.00126	-2.53051	0.04088	NA	0.2989	0.0902	-2.53051	-1.10757	-1.29422	2.03834	-0.18965	1.20255	-2.89069
comp1050903_c0_seq1	0.45337	NA	NA	0.04925	NA	-0.30009	-0.63048	0.36508	-1.801	NA	-0.46016	NA	-3.90002	-1.40843	-3.80799	-1.21687
comp1051_c0_seq1	-0.60881	NA	NA	1.88533	0.00436	0.73094	NA	0.68065	-2.40616	0.00436	0.56031	NA	NA	-1.93961	NA	2.24343
comp105100_c0_seq1	0.038	NA	-0.03404	0.02652	0.65764	0.75115	-1.63953	-0.12925	-0.03214	0.65764	0.45502	2.10441	-0.92603	-1.45076	-0.53762	-0.84798
comp1051015_c0_seq1	0.20321	0.56593	0.837	-2.20788	1.98729	0.47187	2.23606	0.94314	-0.91286	1.98729	1.14964	-1.31298	-0.37384	1.02392	0.91647	-1.98239
comp105106_c0_seq1	0.00401	0.54102	1.18728	-0.39795	0.00436	-0.8563	-3.28738	-0.98008	-3.99653	0.00436	-0.11157	NA	1.80634	1.5788	NA	-4.56619
comp105107_c0_seq1	-0.18631	NA	-0.20102	0.00613	1.6133	2.1419	0.67014	0.06781	0.66834	1.6133	-1.11945	NA	0.02775	0.54867	1.1619	-2.31568
comp105115_c0_seq1	0.71316	NA	1.22059	-0.14432	1.87643	1.12836	-0.61165	-0.88479	0.16327	1.87643	-1.86361	2.38285	-3.7288	NA	1.44363	0.03842
comp105119_c0_seq1	-0.0416	NA	0.09774	2.55833	-0.73763	3.27865	-3.35946	NA	-0.87384	-0.73763	1.72664	NA	1.61064	-2.62766	3.95451	-0.33344
comp10512_c0_seq1	NA	0.55507	NA	NA	NA	NA	NA	NA	NA	NA	NA	NA	NA	NA	NA	NA
comp1051200_c0_seq1	-0.25198	NA	0.48576	-0.82823	-0.35465	0.48482	-4.08811	-0.34836	-0.03893	-0.35465	-1.38554	1.43539	1.9419	-0.77335	-1.53638	0.35022
comp105127_c0_seq1	0.45103	1.63592	3.83492	2.92241	0.2956	-0.68936	-0.31744	-0.50286	0.27141	0.2956	1.79328	-2.53715	-0.69979	NA	-2.3716	1.23428
comp1051286_c0_seq1	-1.61682	0.41782	NA	NA	NA	-0.04122	NA	-0.41534	NA	NA	0.95055	NA	1.51406	NA	NA	NA
comp105131_c0_seq1	0.60381	1.61051	NA	1.6979	-0.95741	-0.50662	-1.48422	-0.89305	-2.42867	-0.95741	1.17334	NA	NA	0.9493	1.41062	-0.30119
comp105134_c0_seq1	-0.24707	NA	1.35082	0.92252	0.00205	0.8582	-4.3708	-0.56101	-1.32067	0.00205	0.17489	-2.2237	0.53774	-0.16249	1.29652	-3.23903
comp105143_c0_seq1	-0.28328	1.63592	-1.31982	-2.74997	-2.84495	0.70935	-0.61172	0.00394	1.79591	-2.84495	-1.26468	-2.17131	-0.00548	-0.10413	-4.93797	-0.05057
comp1051483_c0_seq1	-0.71246	NA	5.02628	-2.4567	0.00437	0.74003	-3.74293	-0.34629	0.91978	0.00437	1.12053	NA	-0.31853	1.01875	0.85833	0.8444
comp10515_c0_seq1	-0.03041	0.55507	-0.08514	1.49595	-0.00408	-0.23545	4.83089	0.81854	-1.364	-0.00408	-0.11761	2.21014	-0.91905	0.23009	0.55077	-0.50221
comp105155_c0_seq1	0.61316	1.63592	0.70303	0.81287	0.50554	-0.63556	-5.67468	-0.14224	-0.69882	0.50554	-0.4183	2.46595	-0.19479	-3.54985	NA	2.36904
comp10516_c0_seq1	0.44328	NA	-0.37841	-0.72193	0.29909	-0.77087	-0.61173	0.65524	-0.80848	0.29909	-1.0938	-0.14513	1.00449	-4.58152	1.10797	0.99937
comp105162_c0_seq1	NA	0.56593	-1.74106	2.66093	0.96614	-0.04121	NA	NA	1.29395	0.96614	NA	NA	3.30478	NA	NA	NA
comp105163_c0_seq1	0.03064	1.89868	0.63829	-0.45721	0.00438	0.83059	-2.75964	0.11665	-1.03185	0.00438	-0.3405	NA	1.3519	-0.55622	-1.19442	-2.57303
comp105168_c0_seq1	-0.06843	1.30181	1.51222	-0.01313	-1.29251	1.84528	-0.33547	-0.08865	0.20158	-1.29251	-0.39704	NA	2.61233	0.19983	1.0878	1.41772
comp105171_c0_seq1	-0.68882	NA	NA	0.11402	NA	-0.25028	-0.61169	NA	-0.03927	NA	2.11183	NA	-0.00258	-3.75963	-3.64627	-5.32459
comp1051713_c0_seq1	-0.15811	0.85938	-1.09462	-1.61767	1.31375	-1.23056	2.13955	0.86574	0.14371	1.31375	-0.2252	4.06068	-0.78146	-0.69885	2.18837	-2.15197
comp105177_c0_seq1	-0.16553	-0.26012	-1.2524	-0.0468	0.2594	1.71912	-2.75965	-0.23311	-1.77328	0.2594	0.42062	NA	-0.0969	0.19809	-1.58472	-2.62583
comp1051776_c0_seq1	0.06482	0.41782	1.12035	3.62969	-0.02999	1.0514	0.63898	-0.20011	-2.51155	-0.02999	-1.01676	-6.4741	-1.17273	1.89625	-9.19226	-0.33355
comp105178_c0_seq1	-0.5801	NA	0.93439	0.79724	-0.97407	0.85277	-0.61173	0.65674	-0.15776	-0.97407	0.71586	2.94646	3.17408	-1.55193	-2.36552	-1.4845
comp1051781_c0_seq1	-0.01802	NA	NA	-1.89426	0.00436	-0.35761	5.41592	0.77507	-0.3994	0.00436	-0.16548	0.64939	-0.18315	-0.58153	1.01011	-1.22238
comp1051846_c0_seq1	0.15791	0.55507	2.18363	NA	NA	1.01822	NA	NA	NA	NA	-0.36828	NA	NA	NA	-1.285	4.74176
comp1051946_c0_seq1	-0.69393	NA	NA	1.10613	NA	-0.37279	0.683	-0.35701	-1.08146	NA	-0.01065	NA	1.50979	-2.16604	NA	-2.01545
comp1051976_c0_seq1	-0.36228	1.63592	-2.32331	2.9286	0.8685	-0.81707	-2.75957	-1.56226	-1.61216	0.8685	2.70376	NA	-0.15195	0.10157	1.44363	-2.21534
comp1051998_c0_seq1	NA	NA	NA	NA	NA	NA	NA	NA	NA	NA	NA	NA	NA	NA	NA	NA
comp1052015_c0_seq1	0.57922	NA	0.26293	-2.2063	1.14095	-3.5656	2.83095	0.66762	-0.22418	1.14095	1.86549	0.40522	NA	-2.02926	-2.06882	2.60409
comp105217_c0_seq1	0.80558	0.56593	5.15603	-3.99108	0.96614	-0.03333	-3.51573	-0.58423	1.13165	0.96614	0.31552	-3.79946	0.68955	5.64963	1.94159	-2.21339
comp105217_c1_seq1	-0.2157	NA	4.44715	0.09721	0.00436	-0.36924	-1.92987	-1.56862	0.73949	0.00436	NA	-7.37875	-2.89252	-2.02926	1.92118	-0.33361
comp1052174_c0_seq1	-0.62998	NA	2.0706	-0.18711	-1.44127	-0.31327	-4.33046	-0.14121	-0.79556	-1.44127	0.30273	0.73489	0.62069	-2.51187	-3.78278	-0.19357
comp10522_c0_seq1	-0.39944	1.61051	-0.2938	0.74796	-0.73802	1.62872	-2.75962	-0.74517	-0.40076	-0.73802	0.0556	NA	NA	0.28101	NA	0.21948
comp105223_c0_seq1	0.01144	NA	NA	-1.22806	-0.45293	1.02976	1.86741	0.05263	-0.77325	-0.45293	0.07364	1.24895	-0.61273	0.22904	0.54573	1.43387
comp1052239_c0_seq1	0.59951	0.39961	-1.22473	NA	NA	-0.04129	-5.05357	NA	NA	NA	-1.03145	NA	NA	NA	0.99555	-6.21361
comp105229_c0_seq1	0.31062	NA	NA	NA	0.00438	0.90048	-2.95112	0.22898	1.58545	0.00438	0.9644	NA	2.5546	NA	0.7	2.35004
comp1052306_c0_seq1	1.22223	1.63592	-0.33195	-1.32203	1.57006	0.09958	-0.61177	0.13797	0.22565	1.57006	0.06893	-1.5298	-0.64987	0.06484	-1.64829	-1.76022
comp1052315_c0_seq1	-0.31582	NA	0.18106	-0.15711	-1.47616	-0.34166	2.83088	0.74643	-0.29231	-1.47616	-0.10262	3.8798	2.03834	-0.79872	1.41418	1.14001
comp105233_c0_seq1	0.80038	NA	-1.36223	0.03471	-1.47702	-0.84738	-1.44682	-1.1883	0.63175	-1.47702	1.44581	-3.61447	-0.15118	-0.26363	0.00938	-0.63291
comp1052393_c0_seq1	0.5995	NA	NA	1.24558	2.8356	0.8666	-0.61167	-0.11166	-0.22046	2.8356	1.93569	-3.91972	NA	1.5788	NA	-1.64276
comp1052394_c0_seq1	-1.44473	NA	0.0268	-0.34567	2.19316	1.25125	NA	0.70344	0.41695	2.19316	-3.4733	1.58471	3.17408	-2.7085	NA	-3.18155
comp105248_c0_seq1	-0.04018	NA	1.54592	1.32672	0.75493	0.96565	-1.64503	-0.04174	0.13525	0.75493	0.4671	0.21977	0.07676	-1.52572	-0.09677	-0.47182
comp1052548_c0_seq1	0.23056	1.61051	NA	-3.35422	-1.82501	-0.04121	-0.61174	-0.59443	-0.98352	-1.82501	-0.86087	NA	-3.7288	1.71315	NA	-0.33345
comp1052591_c0_seq1	-0.25841	1.61051	-1.22473	-0.5787	0.07789	1.80128	3.03596	0.60619	0.27195	0.07789	-0.75858	NA	-2.50314	0.70904	-0.28076	-2.83076
comp1052606_c0_seq1	0.02779	NA	3.47759	0.85704	-2.39818	0.59994	-7.62495	-0.64407	3.17854	-2.39818	-1.15235	-3.72285	-1.52883	3.69969	-1.00645	-0.33344
comp105271_c0_seq1	-1.42338	0.55507	3.12573	0.40491	0.6599	-0.66329	-3.16687	0.25851	0.12701	0.6599	-1.08462	-0.81077	-1.92758	-4.83088	-0.05289	0.96863
comp105274_c0_seq1	-0.36228	0.55507	0.17083	NA	0.73559	0.62319	NA	NA	NA	0.73559	NA	NA	NA	NA	NA	6.4658
comp105275_c0_seq1	-0.68288	NA	NA	1.9222	0.00438	3.98972	-4.77571	-1.0973	2.32682	0.00438	-2.11724	NA	-2.89252	NA	1.44363	-0.33374
comp105276_c0_seq1	-0.20525	1.89868	-1.07889	-0.30385	-3.23622	0.31344	-4.34341	0.32812	-0.56575	-3.23622	-0.38968	3.73339	-2.60307	-0.82154	-4.77494	-0.99415
comp1052760_c0_seq1	0.25471	NA	NA	-1.106	NA	-0.40548	-2.75967	1.81048	-0.34811	NA	0.29498	NA	-1.83096	2.58149	1.43523	-3.83709
comp105277_c0_seq1	0.1247	NA	0.62559	0.09468	-0.00768	-0.69482	1.92225	0.10809	-0.31286	-0.00768	0.168	1.34393	0.29456	0.32897	0.07167	0.72334
comp1052780_c0_seq1	NA	0.56593	1.26267	NA	1.84714	-0.04122	NA	NA	NA	1.84714	NA	NA	NA	NA	NA	NA
comp1052793_c0_seq1	0.89996	NA	0.38859	-4.38909	NA	-1.34408	-7.86496	0.63502	-1.92892	NA	0.34854	-5.30639	-3.90002	3.20981	0.29758	0.80941
comp105280_c0_seq1	-0.23703	0.56593	0.73755	-0.30198	0.00794	-0.32073	-3.10133	0.04944	-0.48157	0.00794	-0.04497	0.45008	1.18572	1.48482	0.07279	-1.29697
comp1052822_c0_seq1	-0.11665	NA	1.90352	4.9379	2.85017	-2.0196	0.23897	2.28325	0.03705	2.85017	-0.63601	-6.97503	-1.03051	3.31089	0.38357	2.32805
comp105283_c0_seq1	-0.12065	NA	-1.07849	1.24059	-3.43934	0.53599	-4.92793	0.49608	-0.44733	-3.43934	-0.6923	NA	-0.34404	0.27973	1.60858	-1.32767
comp1052842_c0_seq1	-0.2815	-0.35169	-2.70024	4.17049	0.00363	-0.13202	-2.75957	-0.29864	0.40804	0.00363	1.43194	NA	NA	0.04887	NA	1.0739
comp105293_c0_seq1	-0.14368	0.56593	-0.38261	0.83821	0.96615	1.88497	-1.32693	-0.1031	0.687	0.96615	0.06569	3.48113	-1.22338	-0.0163	-2.36552	-0.70317
comp105295_c0_seq1	-0.1464	0.84482	0.94104	-5.5774	0.6368	-0.00308	0.52755	-0.16468	-3.74414	0.6368	-0.3893	-5.84266	-0.29847	NA	3.47167	-0.28827
comp1052988_c0_seq1	0.53752	NA	0.65002	4.00637	1.84714	-1.89027	-3.33848	0.65628	-0.94745	1.84714	0.91774	-7.15454	0.76555	0.8741	3.39105	2.9207
comp105300_c0_seq1	-0.04168	0.56593	NA	NA	NA	2.66396	NA	0.23528	1.2967	NA	0.01285	NA	-2.54623	NA	2.97637	-2.21414
comp1053075_c0_seq1	NA	NA	NA	NA	-0.9574	-1.36124	-0.61165	NA	-2.18256	-0.9574	NA	NA	-0.23291	NA	NA	-0.33346
comp105312_c0_seq1	1.23375	-0.3407	-2.34885	-1.39101	-0.20644	-0.74494	2.83082	2.39146	-1.48795	-0.20644	1.01667	NA	0.16924	-0.67705	-0.6723	-0.33358
comp1053179_c0_seq1	-0.36228	NA	NA	0.09721	-0.95741	-0.04123	-2.75954	-0.94898	0.80779	-0.95741	-0.97297	NA	NA	NA	NA	-0.33344
comp105327_c0_seq1	-0.04169	NA	NA	NA	0.23473	0.37232	-2.75959	0.49168	0.3269	0.23473	2.49061	NA	NA	1.5788	NA	-1.3801
comp1053318_c0_seq1	-0.10365	0.56593	0.97748	0.06646	2.44709	-0.68238	-0.61166	1.09753	-0.07971	2.44709	-1.48755	NA	-2.89252	-3.51529	-1.285	-0.08436
comp1053455_c0_seq1	-0.74367	NA	1.58215	4.00748	-0.68686	1.23875	-2.75961	-0.99029	0.60323	-0.68686	-0.58825	-1.37401	-0.57919	-0.68093	0.24033	-1.53703
comp105346_c0_seq1	-0.40764	NA	-2.2829	0.28371	-0.22027	-0.2685	-0.61172	-0.17747	-0.05347	-0.22027	-0.47646	0.42291	-0.14142	NA	0.67276	0.71655
comp1053489_c0_seq1	-0.15299	NA	-0.38762	-2.19205	0.00436	-0.52047	-0.61176	1.41526	-0.36911	0.00436	0.09904	1.92429	NA	0.71803	2.96303	-0.42124
comp1053521_c0_seq1	0.19082	1.61051	-0.21228	-0.34678	0.36843	0.78412	-1.31813	0.21878	0.44468	0.36843	0.09404	0.25374	-0.8087	1.93867	-0.81016	-1.60861
comp1053557_c0_seq1	-0.39089	NA	NA	NA	-0.95741	-0.68238	NA	NA	-1.08198	-0.95741	0.25148	NA	NA	NA	NA	3.4173
comp1053563_c0_seq1	0.05804	NA	-2.87367	-0.58665	0.96615	-2.11229	-1.70961	-0.25225	-0.8885	0.96615	2.85596	NA	1.03516	-2.35187	-4.07804	-0.47798
comp1053591_c0_seq1	-0.43938	NA	NA	1.33501	0.00436	0.21667	-2.75954	3.03443	NA	0.00436	-0.3469	NA	1.00449	-0.4062	0.18241	-1.65458
comp10536_c0_seq1	-0.04351	1.63592	0.63829	2.4246	-1.0712	1.56324	-2.75954	0.13366	-2.37869	-1.0712	2.53245	NA	2.03834	NA	NA	4.38693
comp10536_c1_seq1	0.11535	NA	1.43615	-3.99237	0.56304	1.69574	-2.75958	-1.46341	2.07799	0.56304	-2.86977	-3.91972	NA	NA	2.50756	2.32259
comp105366_c0_seq1	0.03784	NA	-0.85021	-1.83655	0.24082	0.72744	0.76488	0.11161	-0.2272	0.24082	-0.83525	-1.18369	-0.32096	-0.51234	2.0049	-0.43544
comp10537_c0_seq1	0.06934	NA	-0.49778	1.2381	-1.82887	0.60337	-3.74295	-0.17917	-0.73567	-1.82887	-0.79526	-1.41895	-0.23291	1.71315	3.652	-0.04545
comp105377_c0_seq1	-0.11417	NA	1.78719	3.91096	0.68236	-1.15051	-2.97442	1.14521	2.98542	0.68236	-0.18844	-4.42329	-0.53017	5.63828	0.49571	0.54209
comp10538_c0_seq1	0.74284	NA	-1.08748	0.95269	-0.39609	-0.0782	-3.35946	0.00279	0.26168	-0.39609	0.20034	-0.37681	3.03169	3.24436	-3.51344	-2.13714
comp105392_c0_seq1	-0.26891	0.11352	-1.1543	2.66097	0.00436	0.32772	-4.35705	1.02734	-0.15399	0.00436	1.41936	NA	1.9419	-4.40317	3.02096	-5.49392
comp105403_c0_seq1	-0.3323	0.56593	0.85998	0.09726	NA	3.42147	-3.36872	0.53763	0.31177	NA	-0.4858	-3.36717	-0.27913	2.85896	0.97321	-0.33362
comp1054039_c0_seq1	0.11182	0.56593	0.50365	-0.04473	0.01369	1.7795	-5.56646	1.01138	1.70614	0.01369	-0.91835	-1.4737	-1.43546	-0.48613	2.03689	-1.18177
comp1054063_c0_seq1	0.02606	NA	-0.41529	0.47308	3.86728	-2.15852	2.88947	-0.21315	-0.2846	3.86728	0.69325	-4.75864	-2.47872	-0.26241	-2.68071	2.21292
comp1054068_c0_seq1	-0.27125	NA	-1.22473	7.73108	1.89271	0.59955	-0.61165	-0.18137	0.14046	1.89271	0.56344	NA	-1.5531	2.57213	NA	-0.84384
comp105407_c0_seq1	0.09872	0.56593	-0.2938	-0.61554	NA	-0.38626	-0.53999	1.02246	-0.37808	NA	-0.02501	-1.41498	-0.22305	1.83366	-0.48189	0.53136
comp1054136_c0_seq1	0.26117	NA	0.38186	1.02492	0.00435	0.72542	-0.92895	0.55499	0.62402	0.00435	4.05977	-2.52877	-1.00539	3.56987	-1.50879	-3.67984
comp105429_c0_seq1	-0.04169	NA	1.43074	-2.19208	2.45264	-0.04117	-0.61167	1.27689	-0.70336	2.45264	-3.78168	NA	4.3078	NA	-0.6723	-1.4666
comp105440_c0_seq1	-0.32396	0.62121	0.53529	-0.4815	0.0572	-0.12979	1.12802	-0.93162	-1.33761	0.0572	-0.05663	NA	2.48469	-0.17373	0.85558	3.67747
comp105441_c0_seq1	-0.09482	NA	-1.13101	-0.16969	-1.10395	1.07153	2.83083	-0.12819	-0.70108	-1.10395	-0.6675	2.38841	1.7497	-0.11576	2.56196	-2.65848
comp105446_c0_seq1	0.16417	NA	1.05159	1.18218	-2.41791	-4.158	-2.78659	0.63156	-0.7405	-2.41791	-1.63864	-8.52242	3.71276	0.45863	NA	-3.44916
comp105447_c0_seq1	1.89926	1.11139	2.18962	0.23648	1.8268	1.54976	-4.74087	-2.18522	2.74595	1.8268	-1.91108	0.02638	-1.84862	4.66342	-2.97129	-2.91651
comp10545_c0_seq1	0.32968	0.3014	NA	-0.62035	-1.8818	-0.96646	NA	0.09621	-1.60307	-1.8818	4.49301	NA	2.299	-5.02689	NA	-4.67396
comp105452_c0_seq1	-0.06436	NA	-0.07228	-3.04418	NA	-0.24147	2.10888	0.73852	0.66584	NA	-2.24434	-2.76294	-1.16517	1.58147	0.32082	6.28356
comp1054642_c0_seq1	-0.44676	0.10895	1.58215	4.6691	0.96615	0.65893	-0.61171	0.78065	-0.15399	0.96615	-0.94863	NA	2.03834	-3.75963	NA	-2.11534
comp105465_c0_seq1	-1.18971	NA	0.48853	0.85064	-1.00283	0.65161	-2.77521	-0.94501	0.37231	-1.00283	-0.45251	NA	0.73416	-1.1712	-4.48406	-0.45832
comp1054752_c0_seq1	-1.17582	0.56593	0.63829	-1.77977	-0.03244	0.88271	-2.75954	NA	-0.15399	-0.03244	0.11446	NA	0.62069	-4.33117	NA	0.25887
comp1054791_c0_seq1	-0.35069	NA	0.73127	-1.83399	-0.46396	0.46022	2.83085	0.99039	0.36317	-0.46396	-0.89862	-2.73933	-0.00258	0.86886	-2.5791	-0.79687
comp105514_c0_seq1	-0.19258	NA	-1.61281	-1.23188	-0.95741	0.1768	1.27909	0.26968	0.01887	-0.95741	-0.63476	NA	1.42224	0.26945	-4.4797	-0.60837
comp1055203_c0_seq1	-0.04522	NA	-1.22473	0.37163	0.96615	-0.0412	-0.61165	-2.82408	0.26518	0.96615	0.95057	NA	NA	1.72252	-0.6723	NA
comp105540_c0_seq1	-0.36228	NA	NA	NA	0.96614	-0.04118	NA	NA	NA	0.96614	NA	NA	-1.3276	NA	NA	-0.33872
comp1055436_c0_seq1	NA	NA	0.63829	0.98245	-1.37413	4.98559	2.83096	-3.93551	NA	-1.37413	-0.18967	-8.47865	-1.97859	NA	6.00639	-7.36841
comp1055460_c0_seq1	0.32375	0.33535	0.44567	-0.54318	0.79898	-1.99986	3.30042	0.17898	-3.10589	0.79898	-1.92145	-1.61862	0.56982	2.70345	-3.73847	3.19106
comp105549_c0_seq1	NA	NA	NA	-0.00656	-1.43448	0.95037	2.83088	-2.03918	NA	-1.43448	-3.1349	-3.79946	0.89326	NA	NA	-3.2613
comp1055535_c0_seq1	0.60875	NA	NA	-1.20322	0.00436	-1.8433	7.22327	-0.21451	-0.40746	0.00436	0.15029	-3.79946	NA	1.29331	-1.00895	1.5544
comp1055643_c0_seq1	NA	NA	-0.26945	-2.19209	-3.49494	-3.45883	-0.61173	-0.25695	-0.15399	-3.49494	-1.94691	NA	-2.54623	NA	NA	0.42285
comp105567_c0_seq1	-0.06356	NA	1.08382	1.76056	0.11284	-1.09091	3.83089	0.11845	0.15971	0.11284	-0.9423	-0.2507	3.71276	1.18333	-0.50227	0.03519
comp105568_c0_seq1	-0.29466	0.56593	1.20138	-3.45795	-0.35902	1.31851	-5.45346	-0.08729	-0.4673	-0.35902	-1.28342	-3.86823	2.49557	0.56504	0.90776	-0.7331
comp1055753_c0_seq1	NA	NA	NA	-2.19958	NA	2.18607	-0.61165	NA	NA	NA	NA	NA	4.83455	NA	NA	-5.32375
comp1055782_c0_seq1	-1.04632	NA	NA	NA	0.00436	2.35696	NA	NA	1.28544	0.00436	NA	NA	2.299	NA	NA	-2.25789
comp1055790_c0_seq1	-0.21789	NA	NA	NA	NA	1.29062	1.06661	NA	NA	NA	-0.13696	0.40514	2.16585	NA	4.52112	7.1305
comp1055795_c0_seq1	-0.4026	2.25558	0.94577	-0.59917	1.29348	0.48309	-2.75962	-0.19285	-1.57674	1.29348	-0.46004	NA	2.03834	-0.08402	-1.285	-1.20572
comp105587_c0_seq1	-0.01801	NA	-1.22473	0.85606	-0.05232	0.20293	-0.61166	1.20778	-1.05801	-0.05232	-0.01122	-1.88248	NA	NA	-2.2404	1.0099
comp105592_c0_seq1	-0.68849	NA	1.6961	1.34088	-0.99267	-0.80025	-3.77187	-0.77831	0.14877	-0.99267	0.21246	-0.27051	-1.11296	-1.32424	3.4287	-0.39512
comp105595_c0_seq1	0.27891	1.08931	NA	-2.50137	1.43933	-1.25248	-2.75954	0.10483	NA	1.43933	2.34523	NA	NA	NA	NA	-0.33352
comp105596_c0_seq1	-0.19538	1.63592	1.17266	1.01177	-0.9574	-0.67496	0.77104	-0.13288	-0.34353	-0.9574	0.47703	NA	-1.0917	-2.08674	-0.67498	-0.77827
comp1056014_c0_seq1	0.2792	NA	0.31839	NA	NA	0.39644	NA	NA	-1.39474	NA	NA	NA	NA	NA	NA	-0.33344
comp105611_c0_seq1	0.40649	NA	-0.35741	-0.65042	-0.62554	-1.53687	-1.77247	0.40359	-1.13501	-0.62554	0.40391	-2.25833	-0.99555	3.66936	-0.23249	3.31586
comp105622_c0_seq1	0.37318	NA	-0.53948	0.10563	-0.97138	0.28787	4.83082	0.35157	-0.61828	-0.97138	-0.87522	0.55185	0.88763	1.09856	-1.16598	2.75324
comp105640_c0_seq1	NA	NA	NA	-0.70858	0.00435	-3.97079	-4.08803	3.01485	-1.57242	0.00435	0.41685	1.19351	7.63254	NA	NA	-0.33357
comp105641_c0_seq1	0.04309	0.56593	0.5168	-3.77578	NA	1.00558	-3.76117	-0.23996	-0.62982	NA	-0.27232	NA	1.49591	-0.71899	1.44363	1.14802
comp105647_c0_seq1	-0.41458	0.56593	-1.22473	0.34855	NA	-0.35067	-5.31525	-0.42682	-0.46409	NA	-0.05377	-4.26943	0.84692	4.30295	3.13108	0.51265
comp105658_c0_seq1	0.9334	NA	-0.25268	1.84384	2.42855	2.17034	NA	1.24025	0.75466	2.42855	-0.55919	-4.84439	-2.89252	NA	0.84474	-0.08555
comp10566_c0_seq1	NA	NA	NA	0.34869	NA	1.78656	-4.37152	0.08508	-0.15399	NA	3.06634	NA	NA	NA	NA	1.74843
comp10566_c1_seq1	NA	NA	NA	2.35906	NA	2.11956	-5.20718	0.41501	0.3269	NA	1.58125	NA	-2.54623	NA	NA	-0.33354
comp105660_c0_seq1	0.5995	0.55507	-1.22473	-0.46485	0.00437	NA	NA	NA	0.34529	0.00437	-0.09429	NA	NA	NA	NA	NA
comp105674_c0_seq1	-0.03039	1.61051	0.27	-1.89394	0.92279	1.80948	-0.96937	-0.12924	-0.38659	0.92279	-1.9689	-2.65209	-1.3276	1.85385	0.72898	-1.27315
comp1056741_c0_seq1	0.17579	0.33225	-0.36259	0.25602	-0.95049	0.13797	0.87597	0.54644	0.08854	-0.95049	0.27712	-4.53452	1.87545	0.19637	-0.913	-0.77086
comp1056826_c0_seq1	-0.04169	-0.78671	NA	NA	1.48997	-0.75086	NA	1.02734	0.15818	1.48997	-1.84021	NA	-1.40232	4.20958	-1.83298	2.57148
comp105683_c0_seq1	0.51643	NA	NA	-0.67181	-0.2011	-0.75344	NA	-0.12604	-0.78045	-0.2011	NA	NA	NA	0.07552	NA	5.54485
comp1056867_c0_seq1	0.06078	-0.51414	NA	NA	NA	NA	NA	-0.41534	0.80779	NA	NA	NA	NA	NA	NA	NA
comp1056878_c0_seq1	NA	NA	NA	NA	NA	NA	NA	NA	NA	NA	NA	NA	NA	NA	NA	NA
comp105693_c0_seq1	-0.36228	NA	NA	-3.77751	0.96615	-0.99654	-0.6117	0.23767	NA	0.96615	0.89523	NA	1.51083	-0.33761	1.44363	2.28641
comp105694_c0_seq1	-0.14359	NA	-0.89493	0.18981	-0.49773	1.84308	0.08319	-1.4761	-1.38898	-0.49773	-0.51651	0.18854	NA	-0.3537	-0.24572	-0.33368
comp105696_c0_seq1	0.01653	NA	-0.2938	1.10555	0.96615	-0.14885	1.67786	0.24616	-0.21072	0.96615	0.135	NA	2.16585	-0.26189	1.98887	-1.11326
comp10571_c0_seq1	0.98692	NA	0.83031	2.65343	NA	-0.72745	-0.61165	1.02734	0.46828	NA	-1.72796	NA	NA	1.5788	NA	2.41853
comp1057202_c0_seq1	0.5967	0.56593	0.14911	1.69216	1.85059	-3.44311	-1.01115	0.8961	-1.44804	1.85059	1.32599	-0.01556	1.9419	0.80268	-0.62095	2.32074
comp105721_c0_seq1	-0.35948	NA	NA	2.29699	-0.01373	-1.09447	-0.61174	1.23379	-1.51469	-0.01373	-0.01127	NA	3.80408	3.20981	-3.86105	0.4631
comp105736_c0_seq1	-1.62517	1.44902	0.63829	5.1667	-0.95741	0.50196	-0.61167	-0.72658	0.77653	-0.95741	0.20255	NA	-4.25252	1.5788	NA	-2.97361
comp1057495_c0_seq1	-0.68288	1.13299	6.14655	-2.29932	-0.85455	4.67086	-2.84485	-2.24193	3.84204	-0.85455	-5.96107	-4.26943	-2.44277	2.98357	2.46829	-8.29958
comp105752_c0_seq1	0.77699	NA	0.4246	-1.64324	0.88823	0.96977	-0.61165	-0.66065	-0.19608	0.88823	-0.80343	-3.79946	-0.23291	0.52613	2.37241	-0.37836
comp105754_c0_seq1	0.00054	1.89868	0.03039	1.75888	0.49311	-3.45391	-1.71978	1.29412	-0.12775	0.49311	0.61151	-1.27457	0.51308	1.60605	-1.04617	0.94804
comp1057564_c0_seq1	0.27891	NA	NA	NA	NA	NA	NA	NA	NA	NA	NA	NA	NA	NA	NA	NA
comp105757_c0_seq1	0.00533	NA	2.10683	-4.40207	-1.87757	1.08474	-0.96889	0.48285	-3.2397	-1.87757	-0.99203	3.38575	1.88291	-0.73244	-3.3268	-0.47209
comp105758_c0_seq1	0.5995	NA	1.91724	-1.07283	-1.85085	0.04689	-1.03334	-1.93098	3.81694	-1.85085	-0.1058	-6.99812	-3.29198	NA	4.50687	0.13034
comp1057596_c0_seq1	-0.04169	NA	0.97515	-0.28265	0.00436	0.59995	3.83083	-1.15634	-4.07994	0.00436	2.45825	NA	-2.67479	-1.93961	NA	1.42115
comp1057608_c0_seq1	-0.44928	NA	0.38186	NA	NA	1.23176	NA	-0.3608	NA	NA	-3.07831	-0.37114	-0.96162	NA	NA	-5.23915
comp1057640_c0_seq1	0.89595	NA	NA	NA	0.69194	-1.36834	-0.61176	-0.31915	NA	0.69194	2.36878	NA	NA	0.70125	-0.6723	-6.59544
comp105772_c0_seq1	0.06663	0.55507	2.36804	-0.77342	-1.80902	-2.03685	-1.35455	0.75645	-1.53237	-1.80902	-0.03958	-2.25114	-2.70689	5.77661	-1.11855	0.4206
comp105785_c0_seq1	-0.04351	NA	2.68321	-3.88514	-0.38901	2.78864	-0.61167	0.28028	-1.27508	-0.38901	0.88635	NA	1.64558	-0.41659	-0.55613	3.69043
comp1057850_c0_seq1	-0.30278	NA	0.42027	-0.90667	0.02781	-0.50381	-0.31381	0.23382	0.1332	0.02781	-0.26316	0.37847	-3.53721	-2.1653	0.12759	1.17186
comp105791_c0_seq1	NA	NA	NA	NA	0.46559	0.59984	NA	0.52456	NA	0.46559	NA	NA	NA	NA	NA	-6.6729
comp105792_c0_seq1	0.0762	NA	NA	NA	NA	-1.07271	2.38066	NA	-0.9459	NA	0.14456	NA	-0.86439	-0.97552	-2.96782	-7.29699
comp1057959_c0_seq1	-0.41622	NA	-0.35927	-1.09567	-0.23072	-1.11629	-4.08371	-0.29789	-3.72433	-0.23072	0.77647	-4.75864	4.52332	-0.06681	2.42366	1.77694
comp10580_c1_seq1	0.20368	NA	NA	0.30209	-0.9574	0.44107	-4.32204	-1.35739	-0.6127	-0.9574	-0.98582	NA	NA	NA	-1.71577	-3.4593
comp105805_c0_seq1	-0.52209	1.61051	0.47953	0.68138	1.1376	-0.00458	-4.56525	0.01494	-0.99964	1.1376	0.28782	0.13337	-0.74729	0.06549	0.25645	0.49378
comp1058050_c0_seq1	0.30457	NA	-0.57406	-0.2045	0.48665	0.59994	NA	NA	NA	0.48665	NA	-2.26677	-0.57919	0.74133	-1.83298	-0.33343
comp1058065_c0_seq1	0.18397	NA	2.1937	-2.50322	0.00438	1.80928	-6.15062	-0.46741	-1.41159	0.00438	0.1894	NA	-0.09543	-2.00051	0.83074	-1.37218
comp1058100_c0_seq1	NA	NA	NA	NA	NA	NA	NA	NA	NA	NA	NA	NA	NA	NA	NA	NA
comp1058133_c0_seq1	-0.33082	NA	NA	-6.20593	NA	-1.24234	2.77665	-0.16708	-1.21402	NA	0.07313	NA	NA	-0.97155	-2.21628	3.21171
comp105817_c0_seq1	-1.91771	1.61051	-0.8385	-2.23215	-0.9574	0.21485	-2.75959	-0.47354	-1.23892	-0.9574	0.379	NA	NA	-2.64962	3.72027	0.24318
comp1058178_c0_seq1	-0.05036	NA	NA	0.75897	NA	-0.11962	-0.61167	1.04084	1.68642	NA	0.36502	NA	-1.22338	NA	4.9699	-3.09664
comp105824_c0_seq1	NA	1.61051	1.74653	0.8609	NA	2.54154	NA	1.3306	NA	NA	-0.56556	-0.08179	2.03834	3.6455	NA	-3.85028
comp1058241_c0_seq1	-0.33016	0.11352	NA	NA	-2.39731	-0.0412	-0.31434	NA	0.07314	-2.39731	NA	NA	NA	NA	3.96511	-0.33343
comp1058296_c0_seq1	0.39022	0.56593	0.22101	-1.18555	0.01889	-3.41165	5.41581	0.55688	-1.63131	0.01889	1.25172	0.39309	-1.49689	-1.12821	-1.0914	5.79213
comp105832_c0_seq1	-0.03586	NA	-0.14579	0.97544	1.66881	-1.84479	1.60406	-1.82707	-2.10853	1.66881	1.71496	1.27243	0.63646	-0.88163	-2.1547	0.62196
comp105834_c0_seq1	0.31822	NA	0.63829	0.05738	0.00438	1.61304	-6.16666	-0.88708	1.8632	0.00438	0.77225	-2.66408	-3.14458	4.61449	-1.64428	-4.14097
comp105835_c0_seq1	0.47283	NA	0.18798	0.04846	-0.63997	2.87784	NA	-2.69719	0.06931	-0.63997	-0.01124	NA	2.299	-0.73754	NA	3.11585
comp1058373_c0_seq1	-0.00627	NA	-0.61951	1.24347	0.04796	1.25158	-0.61167	-0.13515	3.63643	0.04796	-1.59348	-1.75298	3.30478	-3.10187	-1.48764	-0.33366
comp1058394_c0_seq1	0.81382	NA	0.1576	-0.50103	0.78098	-1.54577	0.66573	-0.35663	0.13344	0.78098	0.24407	2.28357	0.88763	0.46943	-3.45284	0.61141
comp1058421_c0_seq1	-0.11441	1.63592	NA	NA	NA	NA	NA	NA	NA	NA	NA	NA	NA	NA	NA	NA
comp1058422_c0_seq1	0.62776	1.13299	NA	2.66097	-0.9574	0.74602	-5.31666	0.58052	0.80779	-0.9574	-1.8007	NA	-2.89252	-3.17411	2.37241	7.25625
comp1058427_c0_seq1	0.57929	0.87024	1.29094	-2.03427	-1.01451	0.59998	-3.35938	0.45247	-0.22595	-1.01451	-0.24769	-4.42506	3.03169	1.72252	-1.83298	NA
comp10585_c0_seq1	0.58296	NA	-0.59025	2.66097	NA	2.06371	-3.354	NA	0.41392	NA	0.60182	-3.62331	NA	1.72755	NA	-0.45708
comp105851_c0_seq1	-0.33395	1.87707	-1.94362	1.11756	-1.12493	0.39157	-4.08035	0.02512	0.04487	-1.12493	-0.0595	NA	-3.53721	0.06768	-0.53752	-1.4514
comp105854_c0_seq1	-0.03056	1.63592	-3.25399	-2.50095	0.00436	1.25242	-3.74294	-2.90963	-1.15968	0.00436	0.73822	NA	-2.99784	-3.46562	-0.22527	NA
comp1058614_c0_seq1	-0.03073	NA	1.34245	-4.93839	0.96614	2.80211	-3.83099	1.16731	1.30485	0.96614	0.06234	-6.29921	2.32838	-1.12259	-0.92187	-2.49724
comp105866_c0_seq1	-0.26076	NA	-2.01626	-1.86094	-0.2303	0.8912	-0.61171	-0.00786	0.15296	-0.2303	0.58024	NA	-1.58679	0.07237	-0.6723	3.09644
comp105872_c0_seq1	0.21429	0.39241	5.55565	0.20575	-0.97172	0.83363	-5.7564	-6.09332	0.80779	-0.97172	1.39272	0.59954	-2.43898	NA	1.44363	-0.33355
comp1058735_c0_seq1	0.16426	NA	-3.26474	-0.92634	NA	0.69027	-6.83999	2.90764	-3.33498	NA	0.19168	NA	4.71269	3.59396	-2.06882	-2.21406
comp1058776_c0_seq1	-0.05156	NA	0.70556	NA	0.19132	-0.0413	NA	NA	-1.87207	0.19132	NA	-3.79946	NA	NA	NA	NA
comp1058965_c0_seq1	-0.53179	NA	0.63829	-0.28529	0.00436	-2.0936	0.57183	0.6037	-2.57399	0.00436	-1.51999	-3.91972	0.41829	4.30186	-2.82926	7.02794
comp1059093_c0_seq1	0.62798	NA	NA	0.9854	0.88823	2.90313	-4.73364	0.63874	0.00288	0.88823	0.14823	-2.464	-2.54623	-1.4656	NA	-1.15892
comp1059108_c0_seq1	-0.41827	NA	0.87513	2.45841	0.02357	1.7103	-0.61174	-1.06702	0.75456	0.02357	-1.29261	1.83451	-2.89252	-0.39819	1.81057	0.70036
comp105912_c0_seq1	NA	NA	NA	NA	NA	NA	NA	NA	NA	NA	NA	NA	NA	NA	NA	NA
comp105919_c0_seq1	0.40202	NA	-0.25968	-1.28048	0.3682	1.54816	-2.79148	0.81334	-1.1885	0.3682	-0.22911	1.25281	-0.57919	-1.06742	-2.81729	-3.14345
comp1059204_c0_seq1	0.61763	NA	-2.06106	-1.35532	0.89509	-1.34428	NA	0.59741	-0.14516	0.89509	-0.8345	NA	NA	NA	NA	-0.33886
comp105927_c0_seq1	1.58453	-0.14428	0.63829	-0.86007	-2.43877	2.33569	0.04631	0.22336	-1.92777	-2.43877	-0.40499	NA	NA	NA	NA	-4.18095
comp105931_c0_seq1	-0.77697	NA	0.99778	NA	1.2887	4.19915	-3.35943	-0.32322	-0.15399	1.2887	-0.008	-0.77271	NA	-0.94223	-4.62374	-1.73487
comp1059384_c0_seq1	-0.63191	NA	0.22059	-1.67355	-2.19962	1.83926	-4.73725	-0.31525	-0.33776	-2.19962	-0.35135	0.3325	-0.27866	-2.29744	1.19136	-0.99687
comp1059467_c0_seq1	-0.28029	0.31074	2.97434	NA	-0.59061	-1.81785	-0.61166	0.54644	-0.00288	-0.59061	0.95053	NA	0.41829	NA	NA	-0.33361
comp1059494_c0_seq1	-0.36228	NA	-2.16239	NA	NA	NA	NA	NA	NA	NA	NA	NA	NA	NA	NA	NA
comp10595_c0_seq1	1.50461	1.61051	-0.26945	1.36928	0.96615	-0.03114	NA	-1.84906	-0.33448	0.96615	-0.01124	NA	NA	2.72597	-0.6723	-0.33363
comp105954_c0_seq1	-1.00758	NA	-0.24491	-1.5392	0.96615	-0.68227	-0.61166	-1.25146	0.46737	0.96615	-0.97301	NA	-4.48759	1.72252	1.41062	-0.33349
comp1059592_c0_seq1	0.21779	1.61051	NA	0.94449	0.91484	1.25225	-0.61174	-0.67977	1.34387	0.91484	0.21796	0.37847	3.89176	-0.79919	-1.25284	-0.33358
comp105966_c0_seq1	0.89682	NA	0.08909	1.05001	-1.73806	-1.01	2.83088	-0.79098	-3.23849	-1.73806	0.84212	2.35047	-1.31925	-3.17411	0.76287	-1.23432
comp1059675_c0_seq1	NA	NA	0.54592	0.31575	1.30595	2.56342	-0.61165	-0.91591	NA	1.30595	0.59995	NA	-5.08654	NA	-0.6723	-0.3337
comp1059694_c0_seq1	-0.42699	NA	NA	3.66418	-0.9574	1.07653	-2.75957	-0.94878	0.81812	-0.9574	1.49231	NA	2.299	-0.76209	NA	-0.33353
comp105971_c0_seq1	0.55877	NA	-0.23042	NA	-0.34847	-0.12805	-3.74293	-0.16568	3.01337	-0.34847	-1.12515	1.41071	3.61426	-0.15271	1.77519	-6.84091
comp105975_c0_seq1	0.32415	NA	3.60747	1.11919	-0.95742	-4.03286	7.77214	0.01422	-1.79427	-0.95742	0.68859	-2.94398	-1.50044	1.72755	-1.98062	2.90528
comp1059819_c0_seq1	0.39518	NA	-1.88105	-0.98992	0.96616	2.00961	-4.07504	-0.48108	0.32209	0.96616	1.61505	0.25374	1.33878	-3.58182	-0.39887	-3.5458
comp105998_c0_seq1	0.01405	NA	0.39362	1.22226	-1.85585	0.55572	-0.61166	-0.09759	0.08366	-1.85585	0.25299	1.65186	2.03834	0.27185	NA	-0.74148
comp106001_c0_seq1	-0.11588	NA	NA	NA	NA	0.09262	NA	-0.66233	NA	NA	1.61908	0.49974	2.03834	NA	1.44363	1.61004
comp10601_c0_seq1	-0.34581	NA	0.79497	1.9397	0.20391	1.68388	-0.31188	0.10846	-1.61425	0.20391	0.35762	NA	0.10468	-2.93961	4.01032	-1.98726
comp1060158_c0_seq1	-0.01699	1.61051	0.63829	-0.86007	-2.43847	2.61248	-3.74296	-0.70353	-0.92329	-2.43847	NA	1.31733	-2.89252	2.6456	5.37264	0.8874
comp106030_c0_seq1	0.20568	NA	NA	-0.00755	0.96615	-0.21928	-0.61167	-1.29358	-0.65302	0.96615	1.02995	-1.41016	0.68955	NA	2.39208	-4.20622
comp1060316_c0_seq1	0.0397	NA	1.42602	2.55896	-0.26566	0.34581	-0.61175	0.55471	0.70587	-0.26566	-0.29819	-0.52016	2.06825	0.64376	0.14613	-1.27896
comp1060351_c0_seq1	-0.07355	NA	NA	3.54334	NA	-0.68238	2.83089	-0.6163	2.1814	NA	-0.01124	NA	1.91669	NA	NA	-2.21413
comp106039_c0_seq1	-0.34253	NA	0.0278	1.15405	0.52245	0.44517	-2.75965	-1.34317	0.93373	0.52245	0.77889	4.15334	4.71269	-0.14774	-3.11258	1.14911
comp1060414_c0_seq1	-0.1539	2.0675	NA	-4.93839	NA	1.41491	-0.30034	-0.48032	-1.64998	NA	2.45147	NA	1.80932	-2.87424	-0.83961	1.40772
comp106051_c0_seq1	NA	NA	NA	NA	NA	1.75362	-2.75954	NA	-0.70684	NA	2.52084	NA	-0.66546	-0.84764	NA	1.42099
comp106052_c0_seq1	NA	NA	NA	NA	NA	NA	NA	NA	NA	NA	NA	NA	NA	NA	NA	NA
comp106058_c0_seq1	0.19198	NA	0.63829	NA	0.96615	0.55901	NA	NA	NA	0.96615	2.24731	NA	NA	-4.826	NA	-2.21418
comp106068_c0_seq1	0.17266	NA	-0.26563	-2.17367	-0.96689	-0.14987	2.83086	-0.45675	-0.84932	-0.96689	-0.44357	-0.78745	0.56982	0.7769	-1.97248	2.03785
comp106070_c0_seq1	0.39618	NA	-0.50705	-2.67645	0.8882	-0.24305	2.26791	0.5167	0.55016	0.8882	-0.95271	-4.75864	-1.22338	1.58252	-2.4367	1.86328
comp1060782_c0_seq1	0.04145	0.68778	-0.98881	1.98271	-2.39322	0.78529	-6.90585	-0.39287	-1.5615	-2.39322	1.2471	NA	3.03169	-0.15504	-1.31364	-0.71372
comp1060944_c0_seq1	0.28946	-0.19345	NA	NA	3.5407	-0.04121	NA	-0.16752	-0.42527	3.5407	NA	NA	NA	NA	2.37241	-0.33344
comp106099_c0_seq1	-0.29038	NA	-0.28128	-0.3084	-1.31063	1.56049	-1.30083	0.43599	-0.98978	-1.31063	0.52616	-0.47568	3.71276	-0.99122	-0.30163	-1.35761
comp1061043_c0_seq1	-0.19414	NA	-0.4211	2.53959	-1.52353	1.19276	-0.61169	1.73606	0.72439	-1.52353	-0.55678	NA	0.02775	-4.60157	-3.4295	0.63061
comp106108_c0_seq1	-1.03022	NA	1.25436	-0.79963	-0.12584	-0.16959	3.83085	-0.42941	1.09499	-0.12584	-0.40714	1.50853	-0.27885	-1.9461	1.59446	-1.98581
comp106111_c0_seq1	0.20412	1.61051	-4.32296	-3.20229	1.85957	0.61083	-3.3594	0.89465	-2.25555	1.85957	3.05878	4.61391	-2.54623	1.81431	-4.03119	-2.21418
comp106112_c0_seq1	0.64059	0.55507	0.95834	5.21114	-0.31173	-0.34621	-0.61171	0.32415	0.05317	-0.31173	1.85706	-2.23438	-1.0934	-0.25946	-1.83298	2.10307
comp106118_c0_seq1	0.93376	NA	0.68272	0.40477	NA	1.25125	NA	1.43858	-0.48536	NA	0.04118	0.37847	-1.27016	2.23482	-0.6723	2.78541
comp1061244_c0_seq1	0.14485	NA	0.63829	-3.32551	0.91665	-1.95275	NA	0.92488	-0.52412	0.91665	-1.26641	NA	-2.89252	NA	NA	-5.67323
comp106126_c0_seq1	-0.00427	NA	-0.42136	0.20062	NA	0.19627	1.26422	-0.30097	-0.93628	NA	-0.23088	NA	0.72308	-2.18003	0.48184	-0.46991
comp106127_c0_seq1	0.73382	0.11352	1.8408	NA	NA	-0.63733	-0.28338	0.71382	NA	NA	0.52193	NA	NA	NA	-1.285	-4.17748
comp106131_c0_seq1	-0.67823	0.56593	1.20967	1.49651	1.17805	-0.18255	-4.7757	-1.25151	-1.91318	1.17805	1.13829	2.27316	0.34849	1.5788	0.37662	-0.21098
comp106142_c0_seq1	-0.93619	NA	-0.17294	1.30465	2.88092	-1.94868	-4.37152	-0.35669	-2.95607	2.88092	2.04745	5.00491	-0.27308	3.72105	-0.16051	1.23913
comp106143_c0_seq1	-0.0513	-0.39143	-1.75322	2.35443	-0.11017	-0.22044	-4.57036	-1.68297	0.29199	-0.11017	-0.04228	0.82585	2.03834	-1.59733	-1.285	-2.4123
comp106148_c0_seq1	0.22193	NA	-1.37549	-2.19208	0.89693	-1.61691	-0.61165	0.51978	-1.62768	0.89693	-0.45814	-0.77372	1.05326	-0.22485	-3.83458	-0.11223
comp106148_c1_seq1	-1.14086	NA	-1.83204	NA	-1.31023	-0.72155	NA	0.77949	-1.4299	-1.31023	-0.28818	1.31733	-0.10051	-0.84764	-0.13086	0.81929
comp106157_c0_seq1	0.01969	NA	-0.70316	1.7822	0.7543	-0.80824	0.08704	0.75611	0.1727	0.7543	0.03976	-2.08862	0.72277	-0.01036	-1.35897	-0.28576
comp106159_c0_seq1	-0.24657	NA	1.66853	-2.2375	2.90044	0.41768	NA	-0.36725	1.08851	2.90044	0.54929	-4.26943	4.41129	-0.49301	-3.15979	2.4233
comp106159_c1_seq1	0.22174	NA	0.10053	-1.47828	0.00438	0.50615	-0.6117	-0.03195	-0.98574	0.00438	-0.63571	NA	2.2953	-1.94203	-2.92548	-0.18878
comp1061593_c0_seq1	0.04469	0.56593	-0.55072	-0.85877	2.44249	0.93249	-0.61168	0.44912	0.34779	2.44249	-0.44984	-1.16063	2.299	NA	-1.91522	-0.73456
comp1061658_c0_seq1	0.37953	1.61051	NA	4.6691	1.32596	-5.18756	6.91841	0.54185	-2.17346	1.32596	2.07087	NA	NA	1.85113	-3.04878	4.6722
comp106169_c0_seq1	-0.12946	NA	NA	NA	NA	-0.96229	-3.74299	-0.36296	0.64981	NA	NA	NA	-1.071	NA	0.61395	-0.12188
comp1061740_c0_seq1	0.78756	NA	0.63829	0.24912	-0.95741	-0.26851	-0.61172	0.91589	-0.02867	-0.95741	1.1249	-0.41327	2.03834	-1.30434	-1.93933	1.21163
comp106177_c0_seq1	-0.05629	0.55507	1.64036	0.09725	NA	0.69916	2.83088	1.42497	-0.44649	NA	-0.05068	1.31733	2.299	-0.44147	2.06416	-0.43852
comp106181_c0_seq1	0.96403	NA	-0.14796	2.27676	-0.11732	1.07205	NA	0.31995	-0.80164	-0.11732	0.37161	1.59285	-2.89252	-0.03162	NA	5.66606
comp1061836_c0_seq1	0.32381	NA	-0.09358	3.66394	0.96615	0.07844	-0.61173	0.73328	1.32168	0.96615	-1.59607	-1.88248	-2.89252	-3.25169	NA	-3.8059
comp1061881_c0_seq1	-0.93249	NA	-0.2938	-0.07572	0.05863	1.24071	-3.74321	0.42776	-0.33302	0.05863	1.4447	NA	1.00449	1.32281	2.91168	3.68608
comp106193_c0_seq1	-0.31693	NA	1.17414	-1.14006	-0.55723	1.97439	0.40284	-0.87341	2.70433	-0.55723	-1.2613	0.68137	-3.18161	-1.50253	0.61115	-2.09845
comp106204_c0_seq1	NA	NA	0.63829	NA	NA	NA	NA	NA	NA	NA	NA	NA	NA	NA	NA	NA
comp106210_c0_seq1	-0.15948	NA	-0.26137	-0.05452	-0.10449	0.32994	0.59385	-0.26816	-0.35098	-0.10449	-1.04409	0.92677	-3.7288	-0.46058	-2.86128	-1.68389
comp1062107_c0_seq1	0.14303	NA	0.67195	-0.53783	-0.95741	-0.64109	-0.61165	-1.93054	-0.15399	-0.95741	2.21606	NA	-2.89252	2.71595	NA	0.41357
comp106220_c0_seq1	-0.15381	NA	-0.55796	-1.37443	0.00437	-0.78147	-0.61174	-0.188	0.37335	0.00437	0.2558	NA	0.67163	-0.26511	1.91466	-1.98788
comp1062290_c0_seq1	0.0199	NA	NA	NA	NA	-0.04129	NA	NA	-1.66091	NA	0.79328	NA	6.07196	NA	NA	-2.21402
comp1062298_c0_seq1	0.10011	0.83396	-1.13654	1.87149	-1.80365	-0.12453	-2.05371	-0.55171	-1.62365	-1.80365	0.93623	1.51681	1.47274	3.64902	-0.48607	-0.11884
comp1062330_c0_seq1	0.04205	NA	0.34723	0.09723	-0.1571	0.16469	-0.30039	-0.25421	-0.8894	-0.1571	0.22017	NA	NA	1.5788	3.97564	-1.11389
comp1062355_c0_seq1	-0.29985	NA	0.24565	0.56948	0.87212	-1.2644	-1.30317	0.42001	-0.63741	0.87212	0.69298	-6.10794	-1.53731	0.29577	2.33425	0.49897
comp1062376_c0_seq1	1.06925	NA	-0.02058	2.43722	-0.66906	0.58554	2.83091	-0.26639	-0.42819	-0.66906	0.34158	-0.0385	0.38896	-0.34669	2.7586	-1.72273
comp1062398_c0_seq1	-0.89356	NA	-0.24192	2.42137	0.5033	0.00287	NA	NA	0.09783	0.5033	2.22733	NA	2.299	1.72252	3.71276	-3.18201
comp106240_c0_seq1	0.01219	NA	1.58215	-1.17502	-1.5936	1.04774	1.64994	-0.36024	0.15355	-1.5936	-0.84478	-2.49542	NA	0.3367	0.04205	0.45014
comp106241_c0_seq1	NA	1.27289	-0.70266	1.15897	-0.20323	-0.68228	-2.75954	-3.12605	-4.3939	-0.20323	1.90827	-0.13177	1.70756	NA	NA	-0.33343
comp106244_c0_seq1	0.75544	0.56593	NA	1.29337	-0.9574	0.01701	-5.22434	-0.41929	0.94008	-0.9574	-0.02115	NA	-0.09126	1.5788	-0.6723	-2.45496
comp1062507_c0_seq1	-0.04169	NA	NA	NA	0.02975	-0.04118	2.28452	-0.29376	NA	0.02975	-0.01129	NA	3.03169	3.31169	NA	NA
comp106251_c0_seq1	0.14716	NA	1.37168	1.17081	1.33988	-1.66047	0.12177	0.11197	-0.47711	1.33988	-0.36541	-4.57397	1.13204	1.41001	-1.39498	1.68909
comp106256_c0_seq1	0.27559	NA	-0.3269	1.36622	-0.111	1.3788	-4.36712	0.79125	1.46975	-0.111	-0.89171	-3.39369	1.33878	1.52873	-0.52787	-2.47786
comp10626_c0_seq1	-1.08356	NA	0.46868	0.09859	-0.50802	0.45303	-5.08287	0.59407	0.21539	-0.50802	-0.1783	0.573	1.16537	0.24295	-1.12086	-0.61401
comp106265_c0_seq1	-0.04168	1.10053	-0.04682	-1.9769	-0.85879	2.20884	NA	-0.20275	0.3269	-0.85879	1.85635	NA	2.03834	NA	NA	3.39342
comp106268_c0_seq1	0.74387	NA	1.99948	NA	0.98356	0.59991	-0.61165	-1.36432	-1.03241	0.98356	-1.8176	NA	1.61064	NA	-3.267	-0.33365
comp1062739_c0_seq1	-1.15952	NA	3.68887	NA	-0.76229	1.49221	0.08313	-0.13844	0.25511	-0.76229	0.46165	NA	-0.31853	NA	-4.2012	-0.33346
comp1062754_c0_seq1	0.24175	NA	NA	1.77912	NA	0.21553	-0.6117	0.16454	0.19801	NA	-0.0075	NA	NA	-1.14032	NA	-7.75234
comp1062755_c0_seq1	-0.05923	1.63592	-1.67973	-0.33322	1.48182	0.46312	-2.76915	-0.09619	-0.85381	1.48182	0.32761	-0.26382	3.30478	-0.91699	-0.13471	0.49926
comp1062762_c0_seq1	-0.16864	1.63592	-0.33054	0.72579	0.64531	0.15167	-0.61167	0.30891	-0.81124	0.64531	0.65753	2.92456	NA	-2.12124	3.44209	-0.62156
comp106278_c0_seq1	0.01728	NA	-1.05934	1.25583	1.28266	0.52698	2.83083	-0.42976	0.33484	1.28266	-0.78673	-3.91972	4.57643	-1.38757	-1.11438	-1.43215
comp106281_c0_seq1	-0.90215	NA	NA	-2.40975	-0.90546	4.30287	NA	-1.30568	2.19016	-0.90546	-2.87938	-0.67334	-0.31853	NA	2.42927	-5.53671
comp106289_c0_seq1	1.1475	1.61051	NA	0.17258	0.61024	-0.84497	-2.75954	-0.44703	0.8363	0.61024	1.39433	NA	1.13204	0.5464	-4.74814	-0.41491
comp106297_c0_seq1	0.37294	-0.19345	-0.49836	-0.62035	0.00436	-1.14194	-3.74293	0.07166	-0.06144	0.00436	-0.68386	0.37847	NA	-0.80055	1.69784	0.1462
comp106300_c0_seq1	0.27891	0.47024	1.17266	2.4206	0.96615	-0.68233	-2.75954	-1.39641	NA	0.96615	0.95055	NA	2.299	NA	NA	-0.33347
comp106309_c0_seq1	0.02667	-5.16562	0.69193	0.96409	0.38439	0.42288	-1.69923	0.36235	-0.18675	0.38439	0.02024	-2.61697	4.17419	0.55642	-1.63129	0.03722
comp106313_c0_seq1	-0.62427	NA	NA	NA	-0.02504	0.63115	NA	-2.65705	0.5728	-0.02504	-0.01122	NA	3.30478	NA	-0.6723	2.37222
comp106322_c0_seq1	-0.19453	NA	-0.14864	1.32438	NA	1.58826	NA	NA	0.89248	NA	0.14151	NA	NA	-0.87333	2.42411	-3.61394
comp106332_c0_seq1	-0.53289	NA	NA	1.60214	1.84918	NA	NA	NA	-0.9777	1.84918	NA	NA	2.03834	NA	NA	NA
comp106333_c0_seq1	-0.63981	NA	-1.26454	4.60587	1.34849	0.41452	-0.61173	-4.45603	-1.98589	1.34849	1.38473	-2.35462	4.17419	-4.67162	3.66238	0.26165
comp1063413_c0_seq1	0.63758	NA	0.04758	0.34516	-1.16038	-0.40188	3.83088	0.27553	1.08956	-1.16038	0.20826	1.25065	3.03169	2.06375	2.5709	-1.08626
comp106342_c0_seq1	-0.76167	NA	0.28405	0.20035	0.58433	1.2954	-2.39889	1.07576	2.31571	0.58433	-0.9509	-4.11219	-2.61974	-2.49972	-2.5807	-3.4609
comp106345_c0_seq1	0.00192	1.63592	0.96711	0.8927	-0.4861	-0.21484	2.83087	-0.11123	-0.13676	-0.4861	1.07665	NA	0.26971	-0.75465	-1.14667	0.42549
comp106346_c0_seq1	0.03315	NA	2.85325	-0.49171	-1.90353	3.08261	0.62383	-1.33471	3.77459	-1.90353	-4.07957	-2.26676	2.1159	-0.03131	0.68803	-5.13177
comp106355_c0_seq1	-1.79212	NA	NA	2.66094	-0.9574	1.17401	-0.61172	0.9839	-0.96569	-0.9574	-1.72666	0.37847	-2.89252	3.6812	NA	-0.33353
comp106356_c0_seq1	0.80664	NA	1.22333	0.44003	0.44591	0.44482	-1.1049	0.26148	-1.72694	0.44591	0.40229	0.92353	0.88763	0.06302	-1.0116	-0.59519
comp106368_c0_seq1	0.27891	1.06015	2.70982	2.66097	NA	-1.27526	-0.61173	NA	-1.02667	NA	0.95055	-1.41895	NA	2.72597	0.53183	-0.33369
comp106369_c0_seq1	NA	0.55507	NA	NA	NA	NA	NA	NA	NA	NA	NA	NA	3.17408	NA	NA	NA
comp106370_c0_seq1	2.24762	NA	NA	0.06825	0.62608	-2.93042	-1.21386	-1.49304	0.09763	0.62608	-0.47174	4.09833	0.55307	NA	0.43057	0.73115
comp1063755_c0_seq1	-0.11017	NA	0.58208	-0.84231	-2.10761	1.03776	2.92327	-0.79701	-0.01459	-2.10761	-0.04607	1.61585	0.02775	-0.96486	-1.13838	-0.09111
comp1063811_c0_seq1	0.77	NA	-1.04335	NA	1.43833	NA	NA	NA	1.27234	1.43833	NA	-1.6169	NA	NA	1.65136	NA
comp106390_c0_seq1	-0.59542	NA	-0.9251	-1.67409	0.89391	-1.02361	-0.61166	-0.17832	-1.51777	0.89391	0.32159	0.10339	-2.54623	1.6979	0.49316	3.54792
comp106391_c0_seq1	-0.40809	-0.19345	NA	0.15074	NA	0.71852	0.68296	0.35257	-0.89685	NA	0.80326	NA	1.51083	2.3601	-0.13716	-3.3399
comp106394_c0_seq1	NA	NA	NA	3.66405	NA	NA	-3.35938	0.54644	0.89129	NA	-0.90892	NA	4.3078	2.72597	NA	NA
comp106400_c0_seq1	-0.64023	0.87024	1.36392	0.34601	0.02491	1.4821	-5.21242	-0.78445	0.03951	0.02491	-0.18626	1.36302	0.47367	-0.45002	-0.48843	-1.95449
comp106402_c0_seq1	-0.26392	1.28374	NA	0.77234	0.96615	-0.79285	NA	1.5679	-0.58934	0.96615	2.84612	-5.03947	3.03169	-2.93195	-3.67143	-1.07347
comp106411_c0_seq1	-0.68493	NA	NA	-0.73521	NA	0.77837	-0.11375	-0.3431	0.18472	NA	0.41435	NA	-0.65491	1.76176	-1.38405	-0.30301
comp106422_c0_seq1	NA	1.61051	-1.22529	2.66097	0.96615	NA	-3.74291	1.02734	-1.54289	0.96615	0.789	NA	-0.95235	4.15446	NA	NA
comp106425_c0_seq1	-0.00259	1.48989	2.04881	0.65847	-1.44569	-0.04122	-2.28183	1.05596	0.85284	-1.44569	0.2381	NA	3.55217	1.79167	0.23084	NA
comp1064334_c0_seq1	0.2749	NA	1.97209	3.54496	2.32374	-0.28271	-3.76818	-0.76612	0.68087	2.32374	-1.1106	-0.46598	-0.57919	-0.5129	0.62859	-1.3584
comp1064424_c0_seq1	0.18651	NA	NA	NA	NA	NA	-0.28622	NA	NA	NA	NA	NA	2.02303	NA	NA	NA
comp106453_c0_seq1	0.62318	NA	-0.06925	-2.88993	0.25766	-1.0973	2.26017	-0.08653	-1.7205	0.25766	-0.44638	-3.85068	NA	-2.12859	-1.285	-0.73685
comp106455_c0_seq1	-0.02236	NA	0.14643	0.2198	-1.04766	0.24828	NA	-0.46989	0.34496	-1.04766	0.09468	2.87983	-0.20597	-5.14486	3.43186	-0.91091
comp106458_c0_seq1	-0.25732	NA	-0.55865	-1.07633	1.9018	0.87549	-0.34173	-0.07644	1.36939	1.9018	-1.22461	1.58117	-0.23099	0.32425	0.06126	-0.99052
comp106459_c0_seq1	0.79638	NA	NA	3.66632	0.96615	-0.74752	-0.61172	-0.41534	NA	0.96615	0.95054	NA	NA	NA	1.58613	-2.21425
comp106462_c0_seq1	-0.73239	NA	0.86398	-2.38576	0.91734	-0.44374	-4.33306	-0.54085	0.44747	0.91734	-0.0441	-4.26943	-1.40705	3.18931	-0.84971	1.08802
comp1064632_c0_seq1	-1.36933	NA	-0.56795	NA	NA	NA	NA	NA	-0.23794	NA	NA	NA	NA	0.28161	NA	NA
comp106466_c0_seq1	0.49275	NA	NA	-0.0458	-1.50984	0.43136	0.12076	-0.55181	-1.1615	-1.50984	0.35987	NA	4.41129	-2.18177	-0.22121	0.81193
comp1064698_c0_seq1	-0.22842	NA	-1.13359	-2.19205	0.28712	0.29176	-2.75957	-0.85229	-0.7934	0.28712	-1.16507	2.8569	-1.40232	-0.06721	1.0822	1.09987
comp106480_c0_seq1	-0.58313	NA	-1.27051	1.7777	-1.85414	-3.68852	3.07479	1.05559	-0.77746	-1.85414	4.65337	1.72913	1.94981	2.52958	-2.39232	2.27817
comp106490_c0_seq1	NA	NA	-1.22473	NA	NA	NA	NA	NA	NA	NA	NA	0.37847	NA	NA	NA	NA
comp1065038_c0_seq1	-0.22213	0.11352	6.03039	0.97964	0.00437	8.279	-6.85793	-0.45028	4.46121	0.00437	0.41278	NA	-2.34662	4.01192	6.61505	-7.19873
comp1065047_c0_seq1	0.27891	NA	-6.57986	-0.53755	1.10198	-0.04125	-6.37244	2.74886	-0.70684	1.10198	0.5988	-10.7102	-6.40228	NA	1.22555	-0.51048
comp1065118_c0_seq1	NA	NA	NA	NA	NA	NA	NA	NA	NA	NA	NA	NA	NA	NA	NA	NA
comp106515_c0_seq1	-0.41737	0.12072	NA	-0.01194	NA	-2.9283	1.1368	-1.36882	1.23237	NA	0.46346	0.25374	-2.54623	-4.17508	NA	0.25421
comp106518_c0_seq1	0.12535	NA	1.04128	3.54493	0.96614	0.58115	-0.61175	0.30443	-0.2442	0.96614	-0.26431	1.23902	-0.4121	-1.34018	-1.52532	2.98015
comp1065235_c0_seq1	0.85129	NA	-0.17534	-2.2968	-0.24033	0.91624	-3.74298	1.21709	-0.11105	-0.24033	0.7384	NA	NA	0.17638	NA	-6.79703
comp106526_c0_seq1	-0.37657	NA	-0.2938	-0.11982	NA	2.12097	-0.61168	-0.31103	-0.62931	NA	0.21754	NA	-2.54623	-1.2485	NA	-6.88868
comp1065260_c0_seq1	-0.04169	0.10976	NA	-2.9622	NA	-1.75731	-0.61169	0.8846	0.80779	NA	0.29437	NA	1.00449	NA	NA	-0.24262
comp106529_c0_seq1	-0.68479	NA	1.20148	-3.18633	0.96615	0.53485	NA	0.78017	0.53368	0.96615	-0.9245	NA	2.03834	0.23735	NA	2.95294
comp1065293_c0_seq1	0.29439	NA	-3.20437	2.66093	0.80685	NA	NA	NA	-2.23539	0.80685	3.94061	NA	NA	5.96156	-6.71452	NA
comp1065419_c0_seq1	-0.68288	0.11098	2.61641	-2.19205	0.81346	-0.04126	NA	NA	NA	0.81346	NA	NA	NA	NA	-2.4818	NA
comp106544_c0_seq1	-0.94707	NA	1.42636	-1.36878	-0.30241	2.18161	-0.61171	-0.07784	0.46597	-0.30241	1.52289	0.25374	0.02775	NA	-0.6723	-0.33364
comp1065470_c0_seq1	0.37155	NA	-0.14796	-0.56388	-1.43485	-1.84255	-1.12535	-1.51537	-1.1823	-1.43485	1.40731	NA	0.01934	-0.36698	-1.29829	6.43584
comp106554_c0_seq1	0.81625	NA	0.71718	1.17645	0.00367	-2.75273	-0.30037	0.49474	-0.43278	0.00367	1.40138	NA	0.56982	-2.20039	NA	-0.99617
comp106556_c0_seq1	NA	NA	NA	NA	0.96614	NA	NA	NA	-1.38706	0.96614	NA	NA	-2.55651	NA	NA	NA
comp106558_c0_seq1	-0.055	NA	1.0375	0.30441	0.00435	0.82962	-0.64163	0.30161	-0.80928	0.00435	0.0772	-2.26168	0.68955	-2.3962	-2.06882	0.64514
comp106559_c0_seq1	0.13169	NA	-0.5866	NA	-1.09968	2.04387	NA	0.38326	-0.01447	-1.09968	0.27924	0.70708	NA	-5.00432	NA	-0.07173
comp106563_c0_seq1	1.07414	NA	2.0714	NA	-0.78276	0.08997	NA	NA	1.51996	-0.78276	NA	NA	4.61227	NA	1.44363	-3.68348
comp106568_c0_seq1	0.0165	NA	NA	1.40767	NA	1.6349	NA	NA	-0.737	NA	NA	NA	4.3078	NA	NA	-7.79334
comp106571_c0_seq1	0.83688	0.56593	-0.73396	-1.26494	-0.80202	-1.71142	3.17479	-0.78333	1.154	-0.80202	-1.20018	3.98071	-1.63958	-1.47803	-0.6723	-0.88563
comp1065730_c0_seq1	0.58957	NA	1.54875	0.09723	-1.4382	-2.78183	1.67973	-0.6015	-2.23899	-1.4382	0.55057	-1.41498	4.24127	NA	NA	4.89
comp10658_c0_seq1	-0.04169	NA	0.44195	-2.49707	NA	0.59993	NA	-1.3347	-1.40035	NA	1.77979	0.25374	NA	NA	NA	1.42123
comp1065801_c0_seq1	-0.18681	NA	0.59853	0.44024	0.5604	1.89578	0.10287	-0.24176	0.46277	0.5604	-1.4005	0.31118	1.58104	1.11611	0.636	1.71816
comp106587_c0_seq1	-0.29106	NA	0.67606	-0.44741	0.19726	-0.34661	-2.75961	-0.44565	-1.32284	0.19726	1.49023	-0.17803	0.02775	-0.73829	1.86722	-1.40658
comp106588_c0_seq1	NA	0.84482	-2.15464	NA	-0.60977	1.25241	NA	-0.76894	-0.15928	-0.60977	NA	-3.91972	NA	NA	NA	-2.26497
comp106590_c0_seq1	-0.24717	NA	1.11386	0.12557	-1.00899	-0.42849	1.37298	0.11619	-1.22163	-1.00899	-0.01866	2.8066	-0.40219	-0.10323	1.19233	2.05644
comp106592_c0_seq1	NA	NA	NA	NA	NA	NA	NA	NA	-4.358	NA	NA	NA	NA	NA	NA	NA
comp106593_c0_seq1	-1.7195	NA	1.42498	NA	0.25515	-0.0412	-3.35941	NA	NA	0.25515	NA	NA	0.02775	-1.69335	-4.40742	NA
comp106594_c0_seq1	0.0968	NA	-0.30622	-0.5155	-0.62995	1.84074	-4.32181	0.50397	1.19833	-0.62995	-0.80533	-2.54296	-0.33654	0.57733	0.41399	-2.2968
comp1066016_c0_seq1	0.3157	NA	NA	-1.3612	2.18498	0.81031	-3.15686	0.83794	0.39707	2.18498	-0.87326	-6.50535	1.80932	4.773	-0.36152	-3.73268
comp106604_c0_seq1	NA	NA	NA	NA	NA	NA	NA	NA	NA	NA	NA	NA	NA	NA	NA	NA
comp1066068_c0_seq1	0.97527	1.61051	NA	0.80052	0.00435	-0.04126	-0.61165	-0.54156	NA	0.00435	-0.97301	-3.79946	0.34945	NA	1.88986	NA
comp106616_c0_seq1	0.01348	NA	1.44642	-3.35199	NA	-0.46927	NA	0.15184	0.60029	NA	3.74917	NA	NA	-0.18965	-2.06882	0.3865
comp106620_c0_seq1	NA	NA	-0.2938	NA	NA	NA	NA	NA	NA	NA	NA	NA	NA	NA	NA	NA
comp106621_c0_seq1	0.23924	NA	1.64502	4.79281	0.43475	0.02064	-4.32179	0.39492	-0.19324	0.43475	0.29098	-1.78333	-0.64326	-1.92955	-1.96364	0.4291
comp106626_c0_seq1	0.05017	0.56593	0.24814	1.266	1.00149	-1.23483	2.93467	-0.68764	-0.60981	1.00149	0.83099	0.69586	2.11299	-0.4735	0.12818	2.38839
comp1066260_c0_seq1	-0.96434	0.87024	NA	4.73754	-1.2376	-4.41841	-0.61174	-0.26611	-0.15399	-1.2376	1.56574	NA	0.62891	-0.85597	3.47763	1.91407
comp106628_c0_seq1	0.44808	NA	-0.12106	-0.56009	0.33958	-0.20183	1.45265	-0.04421	-1.90666	0.33958	0.77332	-3.91972	2.27319	-0.12427	0.5777	1.08595
comp1066336_c0_seq1	-0.38088	NA	-1.71808	1.43567	-0.48109	0.90347	-0.33126	-0.35651	0.99056	-0.48109	0.45825	0.37847	-1.56864	-1.22016	2.37241	0.51785
comp1066395_c0_seq1	1.16791	NA	0.21688	0.13124	0.96615	-1.93024	-0.61172	1.67841	-0.52194	0.96615	0.00705	-1.41895	-2.54623	0.54823	0.32478	0.00864
comp1066408_c0_seq1	0.61273	NA	0.5168	2.42654	-3.2446	-1.89993	-7.46691	NA	NA	-3.2446	2.57617	NA	2.299	NA	-3.08764	-0.33363
comp1066424_c0_seq1	0.57015	NA	0.91482	-0.35573	0.16061	1.56239	-3.35898	-0.73814	-0.04075	0.16061	-0.62658	-0.71197	1.42116	-0.72026	NA	-1.38911
comp106659_c0_seq1	-0.9081	NA	NA	-3.35428	-0.95742	2.43778	NA	-0.64455	1.43301	-0.95742	2.05606	NA	1.02846	NA	-2.22233	1.7681
comp106665_c0_seq1	0.76337	NA	2.32286	0.96983	0.00438	0.29196	-3.35945	-0.02536	0.05711	0.00438	-0.32088	-2.36429	0.68955	3.64849	-3.65691	-0.00283
comp1066697_c0_seq1	-0.36228	NA	0.18015	NA	1.60121	-0.04121	-4.08806	NA	-0.70684	1.60121	NA	NA	3.03169	NA	NA	NA
comp106670_c0_seq1	0.19322	NA	0.69527	0.85335	-0.27984	0.47713	-3.74302	0.272	-0.15399	-0.27984	0.79845	NA	-1.521	1.13775	0.19422	0.46242
comp106676_c0_seq1	-0.24112	1.61051	1.53508	-0.32554	-0.10509	1.07298	-0.61174	0.10494	-0.94292	-0.10509	-0.66387	0.20088	4.10394	-0.96625	0.16707	-0.44923
comp106678_c0_seq1	0.9249	NA	0.62966	NA	-0.31581	-2.12482	-0.61166	-0.21572	-0.15399	-0.31581	0.563	NA	-2.54623	-6.24877	1.2077	0.02297
comp1066818_c0_seq1	NA	NA	3.47044	0.10585	0.29921	-0.04128	NA	-2.49682	-2.7174	0.29921	1.20753	NA	-0.54729	NA	NA	-0.3335
comp106685_c0_seq1	0.20988	NA	NA	-0.34855	NA	0.97356	2.83096	0.34624	-0.92448	NA	0.06041	NA	-2.472	0.43	-1.38689	0.32042
comp106687_c0_seq1	-0.35376	NA	1.31432	2.63719	NA	2.50364	-0.6117	0.82635	-0.46354	NA	-1.22735	-0.31065	1.50979	-0.1931	-4.79634	0.52565
comp106690_c0_seq1	-0.04169	1.61051	-2.17669	3.36911	1.84714	1.26789	-0.61176	-1.45176	NA	1.84714	3.75655	NA	NA	-3.53687	-0.73436	-4.01907
comp106691_c0_seq1	0.03736	0.56593	-0.2938	4.8881	-2.19117	1.62741	NA	NA	4.53435	-2.19117	-3.44876	NA	-0.92343	1.5788	-0.6723	-4.71448
comp106691_c1_seq1	-0.64435	NA	0.65007	NA	-0.56791	0.6508	NA	NA	5.73614	-0.56791	-1.60776	NA	-0.58856	NA	-0.6723	-5.00132
comp106692_c0_seq1	1.16302	0.55507	0.62338	1.85244	-1.87508	0.94571	NA	3.82935	0.14156	-1.87508	2.04376	NA	NA	0.14192	NA	-0.05402
comp106693_c0_seq1	2.21729	NA	NA	5.97254	NA	NA	-2.12195	-0.41534	0.3269	NA	0.96363	NA	0.88763	1.72252	-5.04669	NA
comp106694_c0_seq1	-0.14149	NA	1.02423	0.7016	0.5975	0.587	-2.7667	-0.5151	0.18091	0.5975	-2.16498	0.76026	-2.03911	0.28986	1.47009	-3.04402
comp1067035_c0_seq1	0.56253	NA	-0.93628	-2.48338	0.00436	-0.87306	-5.34672	-1.23336	-0.50623	0.00436	-0.01127	-0.54307	2.03834	6.53556	2.04909	5.89204
comp106704_c0_seq1	NA	NA	NA	NA	NA	4.22541	NA	NA	NA	NA	NA	-0.738	-1.31344	-3.7109	NA	-0.33348
comp106704_c1_seq1	0.27891	0.55507	NA	NA	NA	2.48242	NA	NA	-0.77746	NA	NA	0.41927	-0.36407	NA	NA	-0.33343
comp106705_c0_seq1	0.59433	1.63592	1.66808	-0.83815	0.16108	-3.20657	-7.10021	NA	-2.48174	0.16108	3.03675	0.07391	0.43262	NA	4.97623	1.37316
comp1067139_c0_seq1	-0.22627	NA	-0.26508	-0.8245	0.00438	-0.65792	-4.566	-0.06315	-0.24716	0.00438	0.10993	-2.15564	2.03834	3.7236	1.8957	1.29525
comp106715_c0_seq1	-1.02599	NA	1.28467	2.43347	-0.51808	-1.64915	-2.75962	-0.41321	0.09303	-0.51808	4.09868	-3.79946	-2.03911	NA	NA	-1.46867
comp106719_c0_seq1	0.47882	NA	1.02604	0.07519	-0.40802	0.36288	-4.56673	-0.93792	-0.87839	-0.40802	-0.12712	-1.94039	-0.20156	-1.90899	-3.49601	3.5837
comp106728_c0_seq1	0.27891	0.85938	3.65207	6.04955	0.52305	-0.04123	-3.35941	NA	NA	0.52305	3.36724	1.20322	-2.39223	NA	NA	NA
comp106731_c0_seq1	-0.15275	0.10636	0.07652	0.46096	NA	1.98788	-3.35946	0.63991	-2.41639	NA	0.59067	NA	-0.65491	-3.61292	NA	-1.84907
comp1067377_c0_seq1	-0.04169	1.12213	-0.11937	0.50943	-0.9574	0.66393	2.83095	-0.30741	1.19778	-0.9574	-0.12387	-4.75864	1.50979	2.72597	-2.50435	2.37517
comp106742_c0_seq1	-0.25917	NA	-0.29272	-0.40658	-0.01438	0.15651	-0.31903	-0.08822	0.55897	-0.01438	-0.17786	0.00614	-0.68442	-1.25374	-0.58659	-0.55838
comp106746_c0_seq1	-0.23183	NA	1.2715	-2.52062	-1.81771	0.29163	3.39512	-0.23355	1.08014	-1.81771	-2.39709	-4.79042	-3.53721	1.56681	-0.21408	-0.42066
comp1067502_c0_seq1	-0.02345	NA	0.38635	0.52434	-0.46576	-1.03388	-1.29249	0.97985	0.99187	-0.46576	-0.09112	1.25065	-0.4121	0.74017	-2.15814	1.47635
comp1067516_c0_seq1	-0.52387	-0.43012	NA	2.4206	0.71424	0.00255	NA	1.91466	1.55209	0.71424	-0.89078	NA	3.30478	2.12526	0.25981	1.69613
comp106754_c0_seq1	-0.02974	0.86715	1.54663	4.24711	-0.23809	3.02896	-2.75954	-0.6567	-0.11105	-0.23809	1.30306	-5.28707	-1.80312	-0.58929	2.1774	-0.33362
comp106761_c0_seq1	2.31632	1.63592	1.10126	2.49169	0.00278	0.16589	-3.74298	0.51136	0.98109	0.00278	-0.57308	1.38133	2.03834	-2.45711	-1.12388	0.93503
comp106764_c0_seq1	-0.45373	NA	1.20904	-2.03295	-0.06429	0.32163	-0.57492	-0.98968	1.03629	-0.06429	-1.66168	-1.89411	-2.4241	0.97898	2.08411	-1.15835
comp106766_c0_seq1	-0.36228	NA	-2.19302	NA	0.00435	1.25242	NA	NA	NA	0.00435	3.24461	NA	0.77638	NA	NA	-0.33351
comp106773_c0_seq1	0.27891	NA	0.63829	2.66092	-0.9574	2.34944	NA	-2.02208	1.95397	-0.9574	1.88364	NA	-2.89252	-3.75963	NA	-0.33355
comp1067748_c0_seq1	0.21237	NA	NA	0.95559	NA	-4.18958	-3.31497	1.07701	1.46463	NA	-0.12388	NA	-4.53224	0.68484	-0.5624	5.23116
comp106778_c0_seq1	0.34604	0.85938	NA	2.25816	-0.28944	1.46973	-0.30034	NA	-1.45606	-0.28944	1.04475	NA	0.19082	-1.49814	-2.2404	0.2355
comp106788_c0_seq1	-0.29091	NA	NA	-3.59967	-1.90967	-1.92009	NA	1.04898	-0.54442	-1.90967	-4.09619	NA	NA	NA	-2.80244	-3.7992
comp106791_c0_seq1	0.4759	0.58161	NA	-1.33579	0.28724	-0.39381	1.66109	NA	1.29395	0.28724	-0.45394	NA	3.03169	2.57213	1.95553	-3.58624
comp106801_c0_seq1	-1.0046	NA	-0.27286	5.13025	0.43762	0.16719	-0.61167	-0.92643	-1.66909	0.43762	0.94275	-0.11094	-1.91715	-2.00526	2.97637	-0.25192
comp106810_c0_seq1	-0.33357	1.63592	1.06897	-0.46627	-1.28496	0.22116	1.63727	-0.35931	-0.23341	-1.28496	-0.0771	-5.97928	2.03834	4.8571	-0.46275	-0.64022
comp1068163_c0_seq1	-0.20004	NA	-0.17556	1.01291	0.02582	-4.3189	2.83089	-0.22478	0.061	0.02582	-0.00626	3.33986	-2.17539	-3.02071	-1.10261	-0.46147
comp106821_c0_seq1	1.20838	NA	-0.17336	-2.01826	2.45264	-2.31417	-0.61173	-0.57363	-1.29112	2.45264	0.24186	-1.25869	-0.23291	NA	-2.34766	2.11605
comp106822_c0_seq1	0.27891	0.35744	-1.22403	1.83636	0.00437	0.59993	-3.74293	-0.41534	-1.02972	0.00437	0.95053	NA	3.71276	NA	-4.08586	-0.33358
comp106833_c0_seq1	-0.02503	NA	1.87997	0.24547	-1.87392	1.95434	-4.32179	0.55693	-1.00441	-1.87392	0.74861	1.31733	2.299	-1.0801	-1.48764	-1.44145
comp106837_c0_seq1	0.27891	NA	0.63955	NA	-0.95741	NA	NA	NA	NA	-0.95741	NA	NA	NA	NA	NA	NA
comp1068372_c0_seq1	0.01417	NA	-1.14373	1.28632	-0.89158	0.43853	0.68303	-1.18851	1.48514	-0.89158	0.26897	-1.81535	-0.31853	-0.06884	1.98758	-2.06733
comp106843_c0_seq1	-0.04168	NA	2.48893	0.09725	-0.53129	2.11843	NA	1.02734	2.38612	-0.53129	1.08629	0.25374	2.299	NA	NA	-2.21411
comp106846_c0_seq1	-0.18162	NA	-1.07889	NA	0.00436	-4.53572	0.37436	-2.71698	1.14574	0.00436	-0.01124	NA	-1.54641	NA	-2.63607	5.05867
comp1068523_c0_seq1	0.01356	NA	1.41738	0.09725	0.00435	-0.47471	-4.08667	0.50775	-2.49295	0.00435	-0.25703	-3.79946	-2.89252	0.61792	-1.0043	-3.40946
comp106857_c0_seq1	0.31093	NA	-0.47726	2.08758	-0.99578	0.25925	-5.08775	-0.73442	-1.40224	-0.99578	-0.2106	0.25374	4.52332	-0.73862	2.48564	0.74326
comp106862_c0_seq1	NA	NA	NA	NA	NA	NA	NA	NA	NA	NA	NA	NA	NA	NA	NA	NA
comp1068645_c0_seq1	0.70646	NA	1.86492	2.42057	2.44732	1.67764	-3.35943	0.18225	-0.36574	2.44732	0.13406	-1.55007	2.03834	-2.00581	-0.6723	-3.85098
comp106865_c0_seq1	-0.60623	1.32614	NA	-2.49202	-1.47685	1.62011	NA	0.25845	0.66438	-1.47685	0.11382	NA	-0.35611	-3.17411	-1.48764	1.50151
comp106866_c0_seq1	-0.78548	NA	-1.50834	-0.62035	0.10467	1.78343	-0.61171	1.38359	-0.82874	0.10467	-0.01126	-3.79946	3.03169	1.5788	NA	-0.33364
comp106878_c0_seq1	-0.10439	1.61051	-0.67963	-0.66026	0.00259	1.25557	-0.54154	-0.5965	0.00318	0.00259	-0.75367	0.12077	-0.197	-0.76868	1.17451	0.1518
comp106880_c0_seq1	0.34133	NA	1.05848	0.47193	0.58555	1.3416	-2.78027	0.15806	0.96855	0.58555	-1.36803	-5.28707	-0.86896	3.35782	1.41419	-3.95303
comp1068807_c0_seq1	-0.11555	NA	-0.50719	0.47918	-1.90833	0.60303	-0.6117	-0.1993	-1.14551	-1.90833	1.24495	1.88005	2.299	1.02189	-5.18242	0.51542
comp1068834_c0_seq1	0.46615	NA	0.30736	-0.223	-0.97653	-0.07901	-2.76732	-0.41946	-0.50386	-0.97653	1.53492	0.17174	-0.28697	0.00998	3.6649	-0.92071
comp106886_c0_seq1	-0.98025	NA	-0.17983	-1.54177	-1.93408	0.15975	-4.95379	NA	0.65318	-1.93408	NA	-3.79946	5.3812	NA	-2.08477	5.51127
comp1068866_c0_seq1	-0.3762	1.04468	1.62805	0.09725	-0.99515	-0.44118	-4.32577	0.33745	-0.73443	-0.99515	-1.28715	NA	-0.23291	-2.04335	0.60225	-0.15837
comp106888_c0_seq1	0.35481	NA	-0.22951	-0.7773	-0.85983	-0.55505	-0.61165	-0.20766	-1.11658	-0.85983	0.47951	NA	4.34935	0.10147	1.39134	2.66472
comp1068887_c0_seq1	-0.55429	NA	2.20576	0.12487	0.96614	1.44956	-2.00592	-1.50804	0.34237	0.96614	-3.61077	NA	2.299	4.30967	-1.64829	-0.33177
comp106894_c0_seq1	-0.46762	NA	-2.17669	NA	-1.81691	NA	NA	-0.89624	-0.98388	-1.81691	NA	NA	NA	NA	3.71276	NA
comp106895_c0_seq1	0.02082	NA	NA	NA	0.00436	-0.91891	-3.74293	1.30282	-0.83374	0.00436	-0.13651	NA	-1.22338	-0.02003	NA	4.37001
comp106902_c0_seq1	-0.09123	1.61051	1.52875	-1.41754	-0.57342	-0.83075	-0.02914	-0.41534	2.00226	-0.57342	-1.57376	-1.36583	-1.73488	1.15309	-3.76214	-1.38153
comp106905_c0_seq1	1.89686	0.55507	0.63829	2.23635	0.14711	-4.09135	1.73455	-2.39773	-2.41834	0.14711	2.44101	-3.26082	0.34587	2.65083	-3.45604	3.85861
comp106908_c0_seq1	0.18375	NA	-0.27264	0.13024	-0.85259	0.65138	-0.61173	0.18946	-1.66573	-0.85259	-0.07277	-1.6987	3.61426	-2.80922	0.52266	-2.54906
comp106927_c0_seq1	NA	0.83396	2.1937	NA	NA	-0.04122	NA	NA	0.80779	NA	0.95055	1.38133	3.03169	NA	NA	NA
comp106936_c0_seq1	0.23661	NA	-0.46518	-0.2548	1.51521	-0.2839	-4.08721	0.87774	-0.10722	1.51521	-0.58478	0.98229	-2.54623	-0.73337	1.47009	-0.6626
comp106937_c0_seq1	0.61311	1.07845	0.63829	0.15193	-1.81028	-2.31597	-0.61167	-0.6703	-0.02091	-1.81028	-1.44962	-4.26943	NA	0.25683	-0.95435	-0.65763
comp106939_c0_seq1	-0.68288	1.61051	-2.69324	-2.37051	1.68735	NA	NA	-0.18411	0.33115	1.68735	0.58789	NA	NA	NA	NA	NA
comp1069419_c0_seq1	-0.2502	NA	-0.37827	1.10474	1.03814	-0.2295	-2.75954	-0.11124	-2.80766	1.03814	0.58337	1.10604	3.30478	0.96558	0.24995	5.081
comp1069479_c0_seq1	-0.97148	NA	2.1937	0.09722	-0.90597	1.63152	1.68251	-3.0396	3.18401	-0.90597	-2.52546	-4.72382	2.299	1.5788	0.60451	-0.33375
comp106953_c0_seq1	-0.03499	NA	2.35083	1.4283	0.35242	-0.38434	-5.06226	-0.14941	0.73475	0.35242	1.18468	1.52509	0.39376	0.01678	0.69762	-1.58371
comp1069553_c0_seq1	1.40951	NA	0.34305	2.66097	0.00436	0.92371	-5.53667	-0.71285	1.22347	0.00436	0.2884	1.92429	1.05871	-3.67726	-5.01462	-6.85614
comp106956_c0_seq1	0.5619	NA	0.28434	1.05511	-0.14886	1.28256	-4.33247	-0.16592	-1.20446	-0.14886	0.3069	0.30822	0.76541	-1.18892	0.79068	-0.00082
comp10696_c0_seq1	-0.64617	NA	1.88062	-0.64228	0.91867	1.36111	-0.61167	0.68672	-2.49429	0.91867	0.33825	-0.42319	3.61426	-0.03529	2.39208	-4.17022
comp1069716_c0_seq1	0.4962	NA	-0.74022	-0.85548	1.38824	-1.3567	-3.74299	NA	0.06285	1.38824	0.38862	NA	-0.27866	1.28159	0.9373	-0.1123
comp106975_c0_seq1	0.41329	NA	0.47667	3.02103	-0.97773	0.13305	-0.15824	-0.1484	-0.27135	-0.97773	1.84183	-1.24969	-1.35186	-0.75938	0.30058	-2.42172
comp1069758_c0_seq1	-0.2347	1.61051	NA	-2.05378	-0.95741	1.50623	-0.6117	-1.46481	0.94958	-0.95741	1.41499	2.28357	-1.16517	0.88604	2.6022	-2.24458
comp106977_c0_seq1	-0.01778	NA	0.62078	-0.18403	-0.9068	0.88107	-2.77208	-0.11676	1.19016	-0.9068	-2.41982	-0.68514	-2.54623	-1.8324	-0.36933	0.51965
comp106982_c0_seq1	0.02763	1.63592	1.24777	0.60348	-0.95742	-1.01136	-0.6117	-0.59344	-0.5918	-0.95742	-2.38642	NA	-0.38188	2.72597	1.31441	0.0783
comp1069839_c0_seq1	-0.36228	NA	NA	2.4224	NA	-0.02603	-3.74293	-0.41534	NA	NA	2.13655	NA	2.299	NA	-3.23323	-2.26072
comp106987_c0_seq1	-0.69854	NA	1.17266	-0.19546	-1.84875	1.01074	-0.61165	1.44709	-0.2518	-1.84875	0.13351	-0.68632	-2.89252	1.60481	1.41062	-2.12108
comp106988_c0_seq1	NA	4.01928	NA	-0.37126	0.91871	NA	-3.35938	-1.3686	-2.62591	0.91871	0.49029	NA	NA	NA	NA	NA
comp10699_c0_seq1	-0.00939	NA	0.35315	-2.19208	0.61546	2.17913	-0.61171	-0.90346	-0.47779	0.61546	-0.04582	NA	2.03834	0.12531	-1.87183	3.6131
comp106994_c0_seq1	0.52937	NA	-1.90002	0.95428	-1.28783	1.69375	-2.75964	-0.30677	0.06991	-1.28783	0.43837	-0.86242	0.26508	-2.00101	-1.84054	-0.80979
comp106995_c0_seq1	0.9201	1.10053	0.63829	2.43643	0.85713	2.14142	-0.61165	0.54644	-0.58255	0.85713	0.38871	NA	NA	2.16635	-0.6723	-0.33375
comp106998_c0_seq1	-0.43503	NA	NA	-0.05991	-1.42225	-0.53725	0.65902	0.03457	-0.2945	-1.42225	0.27736	2.26852	-2.03911	-0.14536	-0.10819	0.98263
comp107001_c0_seq1	0.24197	0.71379	0.5168	-2.50134	0.00438	-2.48108	0.59993	1.52644	1.15312	0.00438	-0.01125	-4.26943	-2.54623	1.72252	-1.91522	-2.47156
comp1070011_c0_seq1	0.63167	NA	-0.81155	-2.19208	-0.7704	-0.0412	-3.35938	1.00688	0.45099	-0.7704	3.02814	NA	-0.57919	1.18027	-1.285	2.78527
comp107011_c0_seq1	-0.46693	1.63592	NA	NA	0.98734	NA	-6.70377	NA	-0.09125	0.98734	-0.01124	NA	1.13204	NA	0.72268	NA
comp1070157_c0_seq1	-0.29548	NA	1.17266	0.85529	0.15663	2.78657	-4.32271	0.48133	1.39345	0.15663	-1.50624	-2.96134	3.30478	-1.22143	-1.65697	-2.12221
comp1070174_c0_seq1	0.19974	0.55507	-1.22092	-1.72464	0.96616	-1.34783	1.33016	-0.34646	-0.0175	0.96616	-0.88366	-6.63151	-0.93817	2.828	-0.86813	-0.657
comp107019_c0_seq1	-0.34116	NA	1.58215	NA	-1.85106	-1.4984	-0.61167	0.11649	NA	-1.85106	0.48737	NA	NA	-3.10187	-2.04592	2.73555
comp1070218_c0_seq1	-0.36228	NA	NA	-2.20483	0.00435	0.16941	-0.61167	0.87745	-1.6057	0.00435	-0.06778	-2.60015	NA	4.39974	NA	-0.33363
comp107023_c0_seq1	-0.04272	NA	1.15927	-0.22417	-1.28574	0.69771	-0.59321	-1.27157	1.38245	-1.28574	0.25926	0.82607	-0.23291	-0.92198	1.31522	0.70001
comp1070262_c0_seq1	0.59951	NA	NA	-2.19208	0.96614	0.61205	-3.74291	1.51852	0.31491	0.96614	2.71802	NA	NA	1.71315	NA	-0.33352
comp107028_c0_seq1	-0.53813	NA	-0.62055	-0.99599	0.71672	1.88309	2.83088	-0.02506	-1.37965	0.71672	-0.95971	4.94776	-3.53721	0.38041	-1.08626	-1.35769
comp107037_c0_seq1	NA	NA	NA	NA	NA	NA	NA	NA	NA	NA	NA	NA	NA	NA	NA	NA
comp1070510_c0_seq1	-0.5204	NA	NA	NA	NA	-2.20367	NA	NA	-0.15399	NA	-0.01124	NA	-2.89252	NA	-3.07999	-0.33345
comp107053_c0_seq1	-0.0971	NA	0.43579	-1.11947	0.06213	-0.60361	0.66007	0.43915	-1.2233	0.06213	-0.76997	-3.02432	4.3078	-0.33716	1.4608	-0.3774
comp107058_c0_seq1	-0.26633	0.12072	1.49998	0.88764	0.96614	-0.36481	-2.13936	0.67979	-1.22639	0.96614	0.50464	0.37847	-1.37367	-1.40337	-0.6723	-0.81262
comp1070610_c0_seq1	NA	NA	NA	NA	NA	NA	NA	NA	NA	NA	NA	NA	NA	NA	NA	NA
comp1070640_c0_seq1	NA	NA	NA	NA	NA	NA	NA	NA	NA	NA	NA	NA	-3.53721	NA	-0.6723	NA
comp1070644_c0_seq1	1.33873	NA	NA	NA	0.60949	-0.04155	-0.63896	NA	-0.72843	0.60949	NA	NA	-0.7633	-0.17376	1.20887	-5.38376
comp1070655_c0_seq1	-1.49083	NA	0.38804	0.30785	-1.15864	1.50502	-0.61173	0.05639	-0.67923	-1.15864	-0.05369	1.05131	3.17408	0.88987	0.91452	0.99843
comp107067_c0_seq1	0.24171	NA	1.03328	-0.37496	-0.57738	0.26711	-5.06645	-0.08249	-0.3123	-0.57738	0.53815	NA	-0.7649	-0.42351	0.71609	-0.49659
comp1070700_c0_seq1	0.62633	1.45988	0.12571	2.59544	-1.00579	-0.1004	-3.76236	-0.14417	-0.87172	-1.00579	2.10758	NA	0.80437	-0.18671	-0.09182	0.78491
comp1070718_c0_seq1	0.20609	NA	2.54086	-2.2018	NA	-1.17078	-0.61169	-0.07159	-0.51064	NA	0.98921	1.88005	NA	-0.03212	-0.79645	0.62391
comp107078_c0_seq1	0.02175	NA	-1.18081	2.04127	-0.76048	-0.49298	2.83096	0.05147	0.14058	-0.76048	0.00185	-1.79694	2.299	2.11005	-0.68336	-0.12181
comp107085_c0_seq1	0.5774	NA	-1.74106	-0.54195	0.00436	-0.89944	-3.30179	-0.41789	NA	0.00436	1.71673	NA	2.299	NA	-2.06882	-2.26507
comp1070931_c0_seq1	NA	0.11352	0.65007	3.10246	-0.9574	NA	NA	NA	NA	-0.9574	0.23317	NA	-2.7935	NA	NA	NA
comp107094_c0_seq1	0.27239	NA	0.27067	0.29354	-0.55643	1.66222	-4.74261	-0.16862	0.93227	-0.55643	-0.56588	-3.96404	NA	-1.57551	-1.60102	0.47715
comp107097_c0_seq1	-1.4852	NA	-0.19918	-1.61392	0.45309	0.60676	4.41586	-0.34066	-1.67559	0.45309	0.13314	2.31739	-1.22338	-0.68359	-1.285	0.02879
comp107107_c0_seq1	0.75544	NA	NA	NA	-0.8683	NA	NA	NA	-0.66067	-0.8683	NA	NA	NA	NA	NA	NA
comp1071113_c0_seq1	-1.34226	NA	-0.06396	0.09725	-0.14124	NA	-0.61171	NA	0.3269	-0.14124	NA	NA	NA	NA	NA	NA
comp1071116_c0_seq1	NA	NA	NA	NA	NA	NA	NA	NA	NA	NA	NA	NA	NA	NA	NA	NA
comp1071121_c0_seq1	-0.66594	NA	1.27949	-1.6263	-1.33041	1.82215	-0.61178	-0.10929	0.45219	-1.33041	-2.38823	-5.28707	NA	1.20265	0.09571	3.74264
comp107113_c0_seq1	0.45217	0.56593	NA	2.1548	-0.95742	-2.55581	-0.61174	0.6446	0.51869	-0.95742	0.537	NA	-0.38915	0.62144	-1.18707	3.53642
comp1071244_c0_seq1	0.27891	NA	NA	-1.00723	-0.3058	0.59996	NA	-1.97884	2.68206	-0.3058	-2.99316	-4.26943	-1.28334	3.15505	NA	-0.33355
comp1071253_c0_seq1	-0.23829	NA	-1.91212	-1.18327	0.49573	-0.46006	-2.76837	0.4668	0.26884	0.49573	-1.20748	-2.37815	-0.2315	-0.35807	0.52291	2.08703
comp1071368_c0_seq1	NA	NA	0.5168	NA	0.00438	0.66826	NA	NA	NA	0.00438	0.95055	0.6383	NA	NA	-2.09088	2.42104
comp107141_c0_seq1	-0.55747	1.61051	-0.72943	NA	-0.24434	NA	NA	NA	NA	-0.24434	NA	NA	NA	NA	NA	NA
comp107141_c1_seq1	0.27891	NA	-0.0281	NA	-0.90391	NA	NA	NA	NA	-0.90391	NA	NA	NA	NA	NA	NA
comp107143_c0_seq1	-0.00596	0.55507	1.27516	NA	0.96615	-0.0412	NA	NA	NA	0.96615	NA	NA	2.03834	NA	2.18276	NA
comp1071473_c0_seq1	0.65332	NA	0.99458	1.29625	-0.95742	0.71963	2.83088	0.63526	-0.79235	-0.95742	2.52824	0.25374	0.88763	-0.88639	-1.36625	-0.14138
comp1071587_c0_seq1	-0.36228	1.23078	0.02555	0.09725	NA	0.59991	-0.61171	1.56432	-0.96427	NA	0.95055	NA	NA	NA	NA	-0.33344
comp1071665_c0_seq1	-0.43166	NA	NA	NA	NA	NA	NA	NA	-0.16981	NA	NA	NA	NA	1.5788	NA	NA
comp107171_c0_seq1	-0.18217	NA	-0.31349	-0.59961	-0.35799	-0.50472	-1.77092	1.35809	0.66288	-0.35799	-0.31806	-0.48146	0.17622	2.99294	-0.35412	1.39419
comp1071757_c0_seq1	-0.13838	NA	1.99307	-1.06063	0.00811	2.43049	-0.61169	-0.09742	0.26617	0.00811	-1.20874	-2.03557	-1.96921	1.85866	2.31875	-1.88766
comp1071798_c0_seq1	-0.39916	NA	0.48673	-0.5888	0.21725	0.46859	-0.61165	-0.11835	0.12321	0.21725	-0.56865	-2.05536	-2.54623	0.50085	1.65091	-1.45813
comp107185_c1_seq1	-1.51871	NA	NA	NA	NA	-0.04121	NA	-0.18681	0.47077	NA	2.05605	NA	1.33878	1.6766	4.36916	NA
comp107190_c0_seq1	0.3406	NA	0.27254	0.47857	-1.07066	-0.21291	-0.7723	0.51998	-0.47435	-1.07066	0.5594	0.81271	0.19825	-1.24391	1.26905	1.9337
comp107198_c0_seq1	-2.48785	NA	-0.23171	NA	0.00436	NA	NA	NA	NA	0.00436	NA	2.35047	NA	NA	NA	NA
comp1071993_c0_seq1	0.1915	NA	NA	0.09725	NA	NA	NA	0.54644	-0.22595	NA	0.95054	NA	2.299	NA	-1.285	NA
comp107201_c0_seq1	-0.82521	NA	1.17266	0.89847	-1.4781	0.56116	-4.73356	0.46492	-1.02141	-1.4781	-1.44383	NA	0.82668	-2.16604	-4.71554	1.63477
comp107206_c0_seq1	-1.1646	0.65182	-2.06874	2.4031	-1.17664	-3.8547	-5.99039	-0.95833	-1.15221	-1.17664	0.72101	0.35074	-0.23291	1.5788	0.70923	1.15904
comp107206_c1_seq1	-0.36115	0.48514	-1.07889	4.60171	-0.60746	-2.81434	-4.32175	NA	NA	-0.60746	0.71168	NA	-2.54623	-3.02802	1.44363	3.69018
comp1072071_c0_seq1	-0.33879	NA	-1.38565	-0.62477	NA	2.46659	-3.75997	0.12247	1.77746	NA	-1.08507	-0.62731	-0.23291	-3.17411	3.97214	-1.30426
comp107210_c0_seq1	-1.53264	NA	NA	0.88077	0.00436	1.44651	-0.61169	-0.08763	-1.76589	0.00436	2.29087	NA	-0.57919	-1.20994	-1.50588	0.01377
comp107224_c0_seq1	0.18777	NA	2.54991	3.36421	0.75416	-1.01043	-0.49034	-0.89624	-1.80777	0.75416	-0.81712	NA	3.17408	0.46397	-2.82236	4.32735
comp10723_c0_seq1	0.93382	1.89868	0.81587	NA	-0.0114	-0.71483	-0.61174	-0.92009	NA	-0.0114	0.44676	NA	NA	1.26884	NA	-4.33856
comp107233_c0_seq1	-0.08127	NA	-1.32615	0.68581	-1.29091	0.53521	-2.07492	0.13637	0.74321	-1.29091	0.23079	-3.36431	-1.01418	-2.5349	-0.79848	-1.84782
comp107235_c0_seq1	0.0048	0.55507	0.98493	2.42404	-0.85605	2.28767	-2.75962	0.22061	0.58907	-0.85605	-0.61404	-2.45266	0.41829	-1.32654	2.73842	-2.12668
comp107245_c0_seq1	0.15318	0.55507	1.26522	2.15139	0.96616	-0.90567	-2.44129	0.23941	-0.12398	0.96616	-0.90359	0.37847	1.80932	0.2074	0.94549	-1.68102
comp107250_c0_seq1	1.25475	1.4342	NA	0.09722	0.00437	NA	NA	1.48759	NA	0.00437	0.07675	NA	3.61426	-2.93195	NA	NA
comp107251_c0_seq1	-0.02381	NA	NA	-3.51254	NA	0.87728	-5.20721	-0.15871	-1.197	NA	-0.97302	NA	3.17408	-0.25593	-0.95941	-0.45233
comp107253_c0_seq1	1.60753	NA	0.46498	-2.19208	0.96616	1.38456	NA	-0.0872	-2.75451	0.96616	-0.27114	NA	4.41129	0.106	1.44363	-0.67829
comp1072534_c0_seq1	0.01101	NA	NA	0.53267	0.00438	1.27718	0.85185	0.04227	-1.30352	0.00438	1.7056	NA	-0.48627	-0.30442	-0.31392	-2.86398
comp1072536_c0_seq1	-0.39081	1.10053	0.63829	NA	NA	-0.77597	2.83092	NA	NA	NA	0.63877	NA	0.31538	-0.21013	-5.6162	4.06869
comp107257_c0_seq1	-0.68288	NA	NA	NA	0.06289	-1.38063	-0.61173	0.3719	0.1343	0.06289	-0.2197	NA	2.03834	-3.61279	NA	-5.46803
comp107257_c1_seq1	-0.85237	NA	NA	NA	0.00438	-0.21921	-4.08678	1.04086	-0.38877	0.00438	1.66705	NA	2.03834	NA	NA	-2.09964
comp1072651_c0_seq1	0.00777	NA	1.07913	-2.32636	-0.5696	-1.14887	-0.61166	1.86471	0.88715	-0.5696	-2.40272	NA	-1.96921	-1.1314	NA	1.37332
comp107276_c0_seq1	-0.25034	NA	-1.79306	NA	0.00435	0.85705	-0.7801	-0.52824	NA	0.00435	0.235	NA	0.56982	-0.26519	2.37241	0.53572
comp107277_c0_seq1	-0.30058	NA	2.77198	-0.65198	0.00437	0.60999	-5.683	0.02535	4.43457	0.00437	-2.68397	-11.4435	4.10394	7.63532	-2.90269	1.37334
comp107285_c0_seq1	-0.61876	-0.19886	NA	1.23358	0.81672	-0.15336	-1.69862	0.45851	NA	0.81672	0.24293	NA	0.02775	4.48776	-0.19001	-3.12273
comp107286_c0_seq1	0.51042	NA	-0.56593	-0.57677	-0.54477	4.91585	-5.20853	1.31618	2.22084	-0.54477	-1.47399	1.85692	0.1008	0.35958	2.46874	-1.76149
comp107287_c0_seq1	NA	NA	NA	NA	NA	NA	NA	NA	NA	NA	NA	NA	NA	NA	NA	NA
comp1072939_c0_seq1	-1.38836	NA	NA	-0.88355	-1.48463	-1.26103	-0.61167	0.86579	NA	-1.48463	-2.12642	-0.26058	2.299	NA	NA	-3.79181
comp1073025_c0_seq1	0.29182	NA	-1.22407	NA	NA	NA	0.53625	NA	NA	NA	NA	NA	-4.1189	NA	NA	NA
comp107306_c0_seq1	NA	NA	0.64957	NA	NA	NA	NA	NA	NA	NA	NA	NA	NA	NA	NA	NA
comp1073115_c0_seq1	0.59951	0.56593	-1.22473	-0.17678	1.85689	-0.47204	-0.61165	NA	NA	1.85689	2.25832	NA	NA	NA	3.71276	-0.33343
comp107321_c0_seq1	NA	0.56593	NA	NA	NA	NA	NA	NA	NA	NA	NA	NA	NA	NA	NA	NA
comp107325_c0_seq1	-0.07153	1.63592	NA	0.1213	NA	0.90362	-2.75958	-0.04996	-1.47728	NA	0.64845	NA	0.4545	-0.21214	-2.55755	-1.072
comp1073369_c0_seq1	0.55861	NA	0.80737	0.05378	-0.88299	0.6457	1.91077	-2.04755	2.98993	-0.88299	-0.49369	0.62087	-0.5861	-2.17629	1.61358	-0.70996
comp107340_c0_seq1	-0.95523	NA	0.9177	-1.72113	-1.44452	1.45297	-0.61169	0.50357	-2.00247	-1.44452	0.71711	NA	-0.31853	-0.198	-0.67883	-3.23739
comp107341_c0_seq1	0.61146	NA	-0.56327	-0.1649	-0.00409	0.53457	0.64707	0.44438	0.35281	-0.00409	-0.45784	-0.47942	-2.89252	-0.71173	-0.44423	-0.20031
comp107342_c0_seq1	-0.68288	NA	-0.85022	4.60148	NA	0.61099	-0.61169	0.39545	0.22376	NA	3.43772	-3.79946	2.03834	NA	NA	-3.79914
comp107344_c0_seq1	-0.17741	NA	-1.00712	2.66097	0.31604	1.25126	-3.32543	-0.42169	NA	0.31604	0.51431	-1.17802	0.40597	NA	-6.29427	-2.82988
comp107354_c0_seq1	-0.01962	NA	-0.20997	-1.07723	0.10138	0.04875	-5.31524	0.62907	-0.00731	0.10138	0.34391	1.82983	NA	-1.53598	NA	-0.10301
comp1073577_c0_seq1	0.03927	NA	-2.77564	2.65723	-0.95742	0.73299	-0.61167	-1.02064	-1.11413	-0.95742	-0.01124	1.17847	-0.31853	-3.02802	-1.19121	-2.61317
comp1073609_c0_seq1	-0.04169	NA	0.26971	NA	NA	-0.04129	-0.61165	1.74698	NA	NA	0.95052	NA	2.05912	NA	NA	-2.26489
comp1073638_c0_seq1	-0.96374	0.56593	NA	0.46029	NA	-2.29716	-2.75957	1.99085	-0.15399	NA	0.95055	NA	2.03834	-2.93195	NA	5.21593
comp107364_c0_seq1	1.61984	0.55507	-0.64333	2.19545	-2.8442	-0.62208	-0.68881	-1.23169	NA	-2.8442	1.77681	NA	1.00123	NA	-2.4818	0.94983
comp107365_c0_seq1	0.09163	NA	-0.75455	2.35657	0.69654	0.89011	0.64318	1.16102	-2.1076	0.69654	-0.9046	1.04124	2.78338	0.49904	-0.53941	-1.5149
comp1073676_c0_seq1	0.02281	NA	4.21585	-5.25287	1.57676	2.94007	-8.3308	-1.27609	1.99675	1.57676	-1.20634	-9.24473	-7.66561	2.66779	-0.34082	-3.84886
comp107368_c0_seq1	0.77634	0.83396	-2.63619	1.14056	0.91665	-0.28971	-4.08285	1.37231	-2.24611	0.91665	0.2523	NA	3.03169	-2.16604	-0.34851	-1.07368
comp107372_c0_seq1	-0.99154	NA	1.54031	0.09721	0.96615	-0.84817	-0.61169	-0.74242	1.05457	0.96615	-0.01127	NA	-3.53721	0.32976	NA	1.58814
comp107373_c0_seq1	-0.23474	NA	-1.22473	0.61513	0.96615	-1.75914	NA	0.67724	NA	0.96615	0.30329	NA	-0.39489	1.30406	-7.48319	3.26205
comp107374_c0_seq1	0.07227	NA	1.52827	1.29214	-0.95741	-1.47318	-6.60153	0.1516	-3.4693	-0.95741	1.79712	-0.80142	2.73866	-4.7115	-2.36552	-0.93611
comp107374_c1_seq1	-0.04097	0.11098	1.78487	0.10423	-0.9574	-1.87896	-0.89317	0.15441	-4.24047	-0.9574	1.30466	-0.43794	3.03169	0.80276	-2.2404	-0.94588
comp107378_c0_seq1	-0.03186	NA	3.06859	NA	NA	1.85252	-0.61168	-0.55596	-0.70684	NA	-0.01125	-1.41895	0.62019	NA	1.99421	0.74629
comp107383_c0_seq1	-0.09746	NA	-0.64749	-0.38734	-1.58193	-0.29097	-4.07852	0.46926	-0.04441	-1.58193	-0.07552	-2.38247	-3.90002	1.8028	NA	2.1558
comp1073830_c0_seq1	-0.2058	NA	1.41286	0.02749	NA	-2.15161	2.19384	-0.17177	-0.15399	NA	0.62366	1.2079	-0.34197	-1.30759	-2.19088	1.06289
comp107389_c0_seq1	NA	NA	NA	2.66818	0.9939	NA	NA	1.57687	0.80779	0.9939	1.96006	NA	2.03834	NA	NA	NA
comp107393_c0_seq1	-0.04293	0.85938	-0.90613	1.00117	-0.26514	-0.75606	0.67275	0.16751	-1.42867	-0.26514	0.93078	1.25065	NA	-2.12907	-0.67637	-0.10275
comp107396_c0_seq1	-0.70193	NA	-0.74713	-0.19661	0.01394	0.71732	1.23064	0.474	0.13958	0.01394	-0.37984	-0.8091	1.11527	-0.73575	1.17887	-0.12825
comp107407_c0_seq1	-0.07376	NA	0.37823	0.62913	0.03461	0.4268	-5.06005	0.82823	0.66177	0.03461	0.92056	0.6339	3.61426	-1.55299	0.83342	-0.38633
comp107408_c0_seq1	-0.36228	NA	0.27919	4.62036	0.00438	-0.13715	-0.90346	-0.86126	2.0439	0.00438	-0.08912	-6.43238	-1.05443	2.65083	2.45712	-0.549
comp107416_c0_seq1	0.13389	1.87707	-1.07168	0.24454	3.17141	0.63672	-4.32534	-0.22179	0.87032	3.17141	0.86796	1.25065	0.10215	-0.04199	-0.06962	-1.42394
comp107422_c0_seq1	-0.78697	NA	NA	-1.15739	NA	0.54192	-2.75958	-2.00522	-0.50017	NA	0.69169	NA	0.4343	-1.12894	NA	-0.99917
comp1074429_c0_seq1	-0.16143	0.11352	-0.75219	-0.16742	-0.90359	-4.29087	-7.1997	1.74575	0.18826	-0.90359	0.88309	-1.6528	3.03169	4.16816	-0.02543	5.63485
comp107446_c0_seq1	-0.60212	0.55507	1.14265	1.60666	-0.0085	-0.73717	-4.33605	0.68468	-0.53262	-0.0085	0.86083	NA	-0.80044	-1.92832	-1.38405	-1.32888
comp1074465_c0_seq1	-1.35812	0.85938	NA	NA	NA	-0.04132	NA	NA	0.80779	NA	-1.31024	NA	NA	-0.24947	NA	-3.21416
comp1074572_c0_seq1	-0.53246	NA	0.81755	3.55264	0.05747	0.20256	-4.32551	-0.05634	0.69228	0.05747	0.7648	-0.79834	4.34935	-0.55579	3.12954	0.03365
comp1074610_c0_seq1	0.20583	NA	-0.56204	-1.5575	1.50888	0.40131	2.83092	0.30559	-0.11133	1.50888	0.16662	-0.45536	2.03834	-3.98084	-4.9469	-1.1716
comp107465_c0_seq1	-0.29947	1.29095	2.77004	-1.49878	NA	0.03222	-0.6117	0.10099	-1.26819	NA	0.85987	1.83451	4.17419	-0.44583	1.44363	0.79053
comp107476_c0_seq1	-0.14696	0.85938	1.99396	-0.23097	-0.67572	0.77199	-3.82156	1.6678	1.47369	-0.67572	0.4673	0.24525	0.13896	1.72752	0.27888	-2.32743
comp107481_c0_seq1	0.4607	NA	-1.61233	-1.23769	NA	-0.57457	-3.74295	-0.0219	-2.71997	NA	1.20096	NA	0.26508	-0.47784	-2.39916	1.6259
comp1074838_c0_seq1	-0.22532	NA	NA	0.09724	NA	2.52071	-4.92195	NA	-1.16282	NA	1.56564	NA	NA	0.15227	-1.03228	1.1486
comp1074841_c0_seq1	-1.30611	NA	1.98529	-0.13408	-2.47345	1.0154	-4.08654	0.1026	0.05608	-2.47345	-0.65532	-4.38782	1.64558	-0.98127	1.06373	3.41526
comp107485_c0_seq1	-0.74799	NA	-2.62291	NA	NA	-6.26446	0.51617	-1.87353	-1.01683	NA	0.54136	NA	0.16555	-1.93961	NA	1.76917
comp1074882_c0_seq1	-0.31962	NA	-0.63817	-0.3516	-0.3539	-0.98933	-2.75961	0.22993	1.97452	-0.3539	1.8077	-2.40871	-4.1189	1.43864	-0.76108	3.33339
comp107490_c0_seq1	-0.19634	0.55507	NA	-0.80457	NA	-4.83611	2.3799	-0.42899	-1.00839	NA	1.61461	NA	-0.96759	1.57052	-1.80674	5.84449
comp107500_c0_seq1	-0.51687	NA	NA	0.31064	0.96615	2.01065	-0.61171	0.78757	-0.41917	0.96615	0.9031	NA	1.02846	NA	NA	-3.25231
comp107503_c0_seq1	0.08958	0.55507	3.54646	2.33362	1.0103	1.11768	-5.08845	-0.9325	2.50088	1.0103	1.14333	0.46896	-0.99905	1.47583	-1.66314	-0.99394
comp107504_c0_seq1	-0.02994	0.1267	1.58215	-0.82947	0.00437	-0.35945	1.37864	0.67645	0.17867	0.00437	0.50202	-4.26943	0.88763	-0.40474	0.6707	-0.72476
comp1075115_c0_seq1	-0.37644	NA	-0.22903	-0.81676	-2.46926	-0.33465	NA	-0.17577	-0.04289	-2.46926	-0.67223	NA	0.52469	1.8393	-0.51706	-0.34297
comp107512_c0_seq1	-0.18538	NA	-0.41529	2.09583	0.96614	-2.86842	1.22986	0.31254	-0.06081	0.96614	1.13601	0.01624	-0.04114	-1.1473	-2.06547	0.85214
comp107515_c0_seq1	0.03811	0.56017	0.5784	0.13124	1.8248	0.81644	-0.48657	0.11468	-0.79199	1.8248	3.35531	-7.30052	0.03564	-3.98084	-1.13319	-0.32686
comp107517_c0_seq1	0.25067	NA	1.32427	-0.78767	-1.88458	0.19683	-0.87921	-0.35476	0.9849	-1.88458	-0.71594	4.02302	0.48681	-1.30972	-2.98926	-0.92055
comp1075187_c0_seq1	-0.23958	NA	2.44023	NA	0.21068	0	-5.37804	-1.15252	-0.13266	0.21068	NA	NA	NA	NA	-1.83298	-6.46133
comp1075322_c0_seq1	-0.70461	NA	0.63829	0.13018	-0.9574	-0.74158	NA	1.49538	NA	-0.9574	-3.42521	NA	NA	-2.93195	NA	2.95265
comp107536_c0_seq1	0.11521	0.85938	-1.18514	4.54844	0.82873	-2.10524	-0.53616	-2.04606	-1.33043	0.82873	0.98708	-0.08138	1.69198	-0.64964	-0.59986	1.1724
comp1075369_c0_seq1	0.09876	NA	1.71108	-2.50134	0.07241	0.14977	0.64412	-0.18944	-1.91372	0.07241	-0.09115	NA	0.75915	-4.11627	-2.08061	0.86657
comp1075378_c0_seq1	NA	NA	-1.22473	NA	NA	NA	NA	NA	NA	NA	NA	NA	NA	NA	NA	NA
comp107542_c0_seq1	-0.04169	NA	NA	-3.99232	NA	-1.18877	2.83085	-1.10786	-0.52016	NA	-0.20277	NA	-1.58019	NA	3.71276	1.74828
comp107550_c0_seq1	-0.35486	NA	0.36593	-1.54377	0.31637	1.05976	-1.58859	1.01218	0.98267	0.31637	-0.99715	-1.58026	0.59333	1.97815	-0.00504	-1.01693
comp107559_c0_seq1	-0.04169	NA	-1.31528	NA	NA	-0.68231	NA	NA	-0.15399	NA	2.05609	NA	3.30478	NA	-4.73872	NA
comp107560_c0_seq1	-0.63141	0.56593	NA	4.50377	-0.90964	-3.31371	0.29441	-0.24762	-1.21774	-0.90964	4.12796	NA	-2.17098	-4.17508	-2.30413	6.55616
comp107560_c1_seq1	-0.04169	NA	NA	2.65079	0.00438	-4.73533	1.27675	-0.46063	-0.15399	0.00438	0.95055	NA	-1.58019	NA	NA	4.65956
comp107562_c0_seq1	0.03415	NA	NA	0.73303	NA	-3.02903	3.46664	-1.42872	-1.66929	NA	3.45875	-0.30737	-2.1955	2.62316	-2.62202	1.82235
comp1075637_c0_seq1	0.23976	NA	NA	-0.07646	-0.9574	0.75821	NA	-0.27015	-0.00562	-0.9574	0.86243	2.04987	0.16924	2.0403	2.42927	-0.07132
comp1075664_c0_seq1	0.59951	NA	NA	NA	NA	NA	NA	NA	0.80779	NA	NA	NA	NA	NA	NA	NA
comp107568_c0_seq1	-1.00544	NA	1.26506	1.21563	0.75352	-0.75056	0.68296	0.69307	-0.65084	0.75352	-0.54708	-1.41455	3.71276	-0.49649	1.88451	3.95226
comp1075697_c0_seq1	0.27891	1.3513	0.3552	0.09725	-0.35618	0.59989	5.83095	-0.83658	0.80779	-0.35618	NA	NA	-2.89252	1.2633	-3.80867	NA
comp107583_c0_seq1	-0.36228	0.24636	NA	NA	0.96615	-1.36128	-0.61175	NA	0.35006	0.96615	NA	NA	NA	NA	NA	-2.26501
comp107588_c0_seq1	NA	NA	-0.64167	-1.14991	0.96614	-4.73728	4.41582	1.14692	NA	0.96614	2.24004	NA	NA	1.71315	NA	3.86999
comp107592_c0_seq1	0.27891	NA	-0.48649	0.89424	1.2988	-0.68233	-6.90985	0.6826	-1.50251	1.2988	3.36777	NA	2.03834	NA	NA	-0.33348
comp1076_c0_seq1	-0.36228	NA	NA	NA	0.00436	NA	NA	NA	0.80779	0.00436	NA	NA	NA	NA	NA	NA
comp1076013_c0_seq1	NA	NA	NA	NA	NA	NA	NA	NA	NA	NA	NA	NA	NA	NA	NA	NA
comp107604_c0_seq1	NA	NA	NA	NA	0.00435	NA	-0.61167	NA	1.99367	0.00435	NA	NA	NA	NA	NA	NA
comp107605_c0_seq1	0.45404	NA	-0.26126	-0.13266	-0.15278	1.41128	-1.1251	0.18078	-0.25701	-0.15278	0.26666	-1.72082	3.17408	0.89957	0.61417	0.97348
comp1076059_c0_seq1	-0.44598	1.63592	0.91183	1.44146	2.71097	0.64808	2.83084	-0.20871	0.77534	2.71097	-0.7967	1.15444	2.03834	-0.36674	1.9648	-1.7477
comp107613_c0_seq1	-0.53857	NA	1.09607	0.71997	-0.44436	0.72425	0.67476	0.60629	-1.48106	-0.44436	-0.08208	-2.7407	-0.4121	-3.05248	-1.285	1.728
comp107615_c0_seq1	-1.10854	NA	-0.04788	1.8359	0.21857	-0.41799	2.83087	0.1288	0.33353	0.21857	0.515	0.17545	-0.68442	-0.91411	0.73991	0.78283
comp107644_c0_seq1	1.51845	NA	-1.9859	-4.43223	-0.02226	-5.46516	-0.32172	0.76344	-0.94593	-0.02226	2.01088	0.6056	-2.89252	1.1533	NA	5.453
comp107645_c0_seq1	0.18269	NA	0.15606	2.2752	-0.85849	-0.39126	1.71078	0.15579	1.28265	-0.85849	0.12178	-6.33531	-0.0584	0.6762	1.60461	-0.54917
comp1076465_c0_seq1	-0.39338	NA	0.27	2.10084	-0.6172	1.25187	-0.61165	0.28785	-0.67956	-0.6172	-1.5581	1.31733	-0.57919	0.8806	-0.6723	-0.33362
comp107647_c0_seq1	-0.07502	0.84482	2.83942	-1.66127	-0.95742	2.04772	-4.61098	-0.49467	1.99469	-0.95742	-1.94066	-4.70251	-6.5103	0.84933	-0.69587	-1.68711
comp107648_c0_seq1	0.1167	-0.5937	-2.17669	1.20253	0.46213	-0.0762	-1.56336	0.71666	-0.41423	0.46213	0.62592	NA	1.07115	-0.14316	-2.30105	1.0478
comp107655_c0_seq1	-0.23426	1.85499	NA	-0.25997	NA	0.55081	0.78535	0.0614	0.36642	NA	-0.3403	NA	1.50979	-3.93002	0.38232	1.30978
comp107662_c0_seq1	-0.55634	0.55507	NA	0.34729	NA	-1.39475	-7.90691	NA	NA	NA	0.3038	6.89653	0.09699	0.56893	-1.38327	-0.35749
comp107674_c0_seq1	-0.62203	1.29095	-0.22926	-1.03733	2.88236	-1.12182	-3.74293	1.08483	-0.36529	2.88236	0.95053	NA	-0.57919	5.00339	-5.20776	4.55492
comp107675_c0_seq1	-0.24919	0.12072	-0.8115	0.80117	0.83822	-1.84647	-3.78487	-0.24693	0.16883	0.83822	3.07107	0.51152	2.03834	-0.40651	-0.6723	2.9539
comp107680_c0_seq1	0.5995	NA	-1.22407	0.09725	NA	-0.68226	NA	NA	-0.15399	NA	NA	-5.87506	-2.54623	NA	NA	NA
comp107683_c1_seq1	-0.30004	NA	0.3825	-1.14751	-2.39786	-0.01412	-0.31918	-0.56212	NA	-2.39786	-0.40117	NA	NA	1.47363	-0.84122	-6.60597
comp107687_c0_seq1	0.31383	NA	2.12264	0.28237	0.15692	0.32815	-4.08809	-0.08031	0.09007	0.15692	-1.13157	-1.91785	-1.05737	-1.02566	0.52558	-1.43923
comp107689_c0_seq1	-0.06966	NA	-0.58294	0.64248	0.96615	1.54248	-5.64967	0.5393	-0.92093	0.96615	0.24971	NA	-0.98218	-0.31376	1.57948	2.38626
comp107690_c0_seq1	-0.12681	NA	0.2075	-0.86495	1.12344	-1.17784	3.83089	-0.16087	-1.58513	1.12344	0.49774	-0.40649	-0.18151	-0.20857	-0.9405	1.22468
comp1076966_c0_seq1	-0.70999	NA	0.19413	-2.18921	1.03114	1.08771	-2.0754	0.21925	-0.42514	1.03114	0.05995	-2.99849	-1.40232	-1.2267	2.28145	-2.11726
comp107698_c0_seq1	-0.32139	NA	-2.01192	-0.16624	0.85706	1.54727	2.83088	0.86745	-0.43834	0.85706	1.96725	NA	2.299	NA	-0.6723	-0.45354
comp107702_c0_seq1	-0.15518	1.10053	NA	-2.19205	-0.95742	0.7975	-0.61172	1.35407	-0.50809	-0.95742	0.48729	NA	2.299	-0.36846	-0.6723	-3.25852
comp107713_c0_seq1	-0.13092	0.5243	3.74446	-3.18406	1.46371	0.71683	2.83089	0.78282	-2.65499	1.46371	0.42265	NA	NA	-1.06656	-1.87183	-2.10916
comp107714_c0_seq1	0.89934	NA	0.63829	-0.1825	-0.02677	1.83108	0.683	-1.1553	0.16235	-0.02677	0.70383	NA	2.03834	NA	NA	-0.33343
comp107716_c0_seq1	0.63658	NA	1.71021	-0.42613	-1.32956	1.26983	-3.74597	1.01057	-0.72686	-1.32956	-0.30211	-0.79051	0.18969	-0.74689	0.95624	-1.97765
comp107720_c0_seq1	0.27891	NA	NA	0.27601	-0.9574	-1.29617	-2.33351	0.55947	-0.70684	-0.9574	2.20494	0.37847	-0.38365	NA	NA	-0.33356
comp107723_c0_seq1	-0.61182	1.61051	-0.01098	0.24305	1.36248	2.1083	-2.75962	-1.45196	1.53238	1.36248	-2.2542	0.62087	2.03834	3.56987	2.42927	-2.21419
comp107726_c0_seq1	0.59951	NA	1.49998	0.09722	NA	1.30744	NA	-0.47343	NA	NA	0.46939	NA	NA	2.57213	NA	-4.21423
comp107728_c0_seq1	0.26836	NA	0.7067	0.688	-0.53921	-0.0317	-0.61167	0.00427	-0.81731	-0.53921	1.77133	1.26774	-0.44118	-1.04843	-0.5771	-0.56314
comp1077281_c0_seq1	0.27891	NA	-0.67699	NA	2.01159	NA	-4.32173	NA	-0.70684	2.01159	NA	NA	NA	NA	NA	NA
comp107734_c0_seq1	-0.11228	NA	NA	-2.12529	NA	-0.21397	-2.75961	-1.37604	NA	NA	-1.38456	NA	3.80408	-0.58406	-1.94763	-1.59482
comp107735_c0_seq1	0.5995	0.56593	1.10352	0.36314	1.43226	-0.0412	-4.32173	-0.38616	0.80779	1.43226	-3.8075	-1.41005	-1.22417	NA	1.44363	NA
comp1077359_c0_seq1	-0.13248	NA	0.26884	0.30303	1.74078	1.29026	0.2492	-0.31762	2.41304	1.74078	-1.45621	-0.7949	1.07082	0.64092	-1.59038	-1.76134
comp1077409_c0_seq1	2.00988	NA	NA	-0.65771	NA	2.58527	-4.9576	-0.99702	1.25703	NA	-0.29483	-6.99313	NA	NA	-3.81916	-3.15517
comp107741_c0_seq1	-0.04169	NA	-3.18985	2.76057	-1.81676	1.08565	-0.61169	-0.03601	-0.19615	-1.81676	-0.15129	0.06784	2.299	0.73131	-0.34177	-0.0023
comp1077421_c0_seq1	-0.68288	1.63592	1.88743	1.97346	-0.55366	-0.04113	-0.61167	0.11377	0.3269	-0.55366	-2.41811	NA	0.02775	NA	NA	1.37342
comp107752_c0_seq1	0.19449	NA	2.67941	-0.24651	-0.88727	-0.00899	0.66896	-0.25004	0.78535	-0.88727	0.16803	NA	0.85343	-0.64243	0.76281	-0.61887
comp1077537_c0_seq1	0.59951	0.56593	-0.82563	-0.80371	1.00917	1.9734	2.83088	-0.07727	-2.19405	1.00917	-0.07291	-1.41895	2.03834	0.27973	3.47167	-2.26498
comp107758_c0_seq1	-0.25381	NA	NA	-1.16395	NA	1.83509	-5.22019	-0.29713	-1.081	NA	0.40008	NA	-0.81824	0.17325	3.16705	-3.33364
comp107761_c0_seq1	-0.21503	NA	NA	-0.61375	-0.70857	1.44698	-0.30042	0.36131	-0.38321	-0.70857	0.10801	-1.22443	1.11527	-1.03771	-0.19476	-0.64773
comp107761_c1_seq1	0.01122	2.0675	-1.22473	-0.01242	-0.43466	-0.19689	0.48329	0.02838	-0.20899	-0.43466	0.17544	-0.87357	0.02345	0.24751	-2.26027	0.39891
comp107763_c0_seq1	0.05125	1.61051	-0.98391	1.79845	-0.59935	-0.08579	-0.99609	0.02314	0.97016	-0.59935	0.9489	-1.02632	1.72835	0.52625	0.07413	0.85651
comp1077631_c0_seq1	-0.7104	NA	NA	-3.99104	-0.85614	0.40805	NA	-0.73025	0.09927	-0.85614	-1.67471	NA	NA	2.13725	4.9699	-0.28144
comp107772_c0_seq1	0.55088	NA	0.71732	1.7684	-0.00059	1.49366	-0.61167	-0.71744	-1.65651	-0.00059	-0.01347	1.31733	2.03834	-3.02802	1.44363	-3.81675
comp107787_c0_seq1	-0.29229	NA	4.01635	0.53019	-0.95742	3.19368	-0.83984	-2.31316	4.8171	-0.95742	-0.28173	-3.39153	-1.2021	-1.04432	0.40792	-0.76134
comp107795_c0_seq1	-0.76876	NA	-0.17954	-0.35458	0.59385	-0.62271	-0.6117	NA	-1.41555	0.59385	1.01949	-0.48148	0.48028	2.74841	-1.83298	1.11923
comp1077955_c0_seq1	-0.49029	NA	-0.68418	0.7249	NA	0.4585	-2.76469	0.09993	-2.68031	NA	0.18236	0.95978	-1.26189	0.30091	-0.32681	0.17529
comp107797_c0_seq1	-0.06465	NA	0.86291	0.504	1.37515	1.41949	0.67996	0.19241	-0.22291	1.37515	-0.74327	-1.88248	-2.54623	0.2504	-1.83298	-1.85298
comp107799_c0_seq1	-0.44698	NA	0.60001	NA	-0.85169	-0.04138	-3.35847	NA	NA	-0.85169	NA	NA	NA	NA	0.50916	-5.21386
comp1078_c0_seq1	0.28988	NA	0.02097	4.08735	NA	0.60047	0.65336	2.79021	-0.25826	NA	1.26702	NA	-0.31853	-0.28373	3.696	1.60616
comp107807_c0_seq1	-0.5013	NA	0.19071	0.95657	0.29492	0.76243	0.68298	0.43033	0.30578	0.29492	0.36839	0.62819	-0.5689	-1.47129	NA	-0.47661
comp107811_c0_seq1	-1.27628	NA	-2.70024	-1.33281	NA	-0.04122	NA	2.52452	-3.62015	NA	-1.74916	NA	NA	3.7167	NA	NA
comp107813_c0_seq1	-0.67815	NA	NA	NA	NA	-0.04123	NA	NA	0.82692	NA	NA	NA	NA	NA	NA	NA
comp1078138_c0_seq1	0.18434	NA	NA	0.40867	-0.9574	1.08143	-0.87372	-1.67665	-1.39555	-0.9574	0.1692	-2.57477	-2.60307	-1.8019	0.55675	3.01784
comp107821_c0_seq1	0.52967	0.51078	2.1937	2.77918	0.05526	1.18586	-2.8458	0.26051	-0.93254	0.05526	-0.3442	NA	2.03834	1.76269	-1.7833	-1.2847
comp107822_c0_seq1	0.25691	-0.02988	0.63829	0.09724	-3.45899	-0.04122	NA	0.54644	0.80779	-3.45899	-0.97296	NA	NA	NA	NA	-0.33343
comp1078244_c0_seq1	-0.3782	NA	-0.29373	-2.48917	1.12996	-1.38892	-0.61172	-0.89624	2.66934	1.12996	0.95055	NA	2.03834	0.81642	-0.75308	-4.15389
comp107841_c1_seq1	-0.47806	0.83396	NA	-1.36349	0.80464	0.59584	-2.75954	1.33417	-2.12396	0.80464	0.59809	NA	3.17408	-3.68164	-0.6723	-0.00229
comp107849_c0_seq1	0.68695	NA	NA	NA	0.00437	1.99482	-22.5119	NA	2.72231	0.00437	NA	NA	1.44278	NA	-4.3771	-3.50726
comp107850_c0_seq1	1.23874	NA	-0.979	1.68268	NA	-1.31744	-0.61168	-1.16056	-1.77869	NA	0.005	0.37847	2.299	2.36227	NA	-3.44369
comp107856_c0_seq1	0.01169	0.55507	0.5363	-0.61931	-0.84133	-0.15057	-3.35035	0.01296	-0.17969	-0.84133	-0.72468	1.88005	-1.92352	2.3439	1.19517	0.62552
comp107858_c0_seq1	0.26794	0.88459	-1.51889	NA	NA	-1.8804	-0.61171	NA	-0.67882	NA	2.21897	NA	NA	1.00896	0.39623	3.87772
comp107861_c0_seq1	0.42228	NA	0.6968	-0.82685	-0.05678	0.11702	1.64873	0.48033	-1.24484	-0.05678	-0.14135	-1.96974	0.12706	-0.8147	1.39879	1.04807
comp1078640_c0_seq1	-0.91032	0.56593	-1.07889	0.97206	0.96615	-1.38544	-0.61173	-1.43527	-0.0131	0.96615	3.28013	-3.04312	-2.89252	2.57213	NA	-2.21421
comp107868_c0_seq1	-0.04169	NA	NA	NA	NA	NA	-0.61165	NA	NA	NA	NA	NA	NA	NA	NA	NA
comp107880_c0_seq1	0.9906	NA	1.65634	2.45783	0.00438	0.92357	-1.31532	-0.62848	0.88309	0.00438	1.07056	-1.70323	0.87641	0.0585	0.25477	-2.01869
comp107890_c0_seq1	0.03646	NA	1.36622	0.19128	0.88318	1.41529	-5.85099	0.65573	0.96817	0.88318	1.37626	-1.41322	0.62891	4.70269	1.16255	-3.79766
comp107891_c0_seq1	-0.22999	0.55507	-1.45263	-2.15912	0.96614	-0.60636	5.41588	1.04006	-2.29204	0.96614	-0.72783	1.98994	-1.81276	1.76317	-2.87371	0.11725
comp107899_c0_seq1	-0.16498	1.61051	-0.03849	-0.97488	1.24785	-0.9218	-2.77866	-0.30646	-3.33577	1.24785	0.80297	0.10163	0.78577	-0.9469	0.45153	1.90578
comp10790_c0_seq1	NA	NA	NA	-2.69906	-1.93768	-0.04122	NA	NA	-3.23029	-1.93768	NA	NA	-1.37367	NA	NA	1.78137
comp1079018_c0_seq1	0.27891	NA	NA	NA	NA	-0.04124	-4.37152	-1.32348	4.58084	NA	NA	NA	0.02775	NA	NA	1.78133
comp1079042_c0_seq1	0.16151	0.85938	NA	-0.35776	NA	1.18312	NA	NA	NA	NA	NA	NA	NA	-3.68164	NA	1.81618
comp10791_c0_seq1	-0.28125	NA	1.17266	0.09239	1.01707	0.84689	0.33646	0.15735	2.73625	1.01707	-1.27621	NA	-1.47657	-1.50341	2.37635	-0.03695
comp107915_c0_seq1	NA	NA	NA	NA	0.96615	NA	NA	NA	NA	0.96615	NA	NA	NA	NA	NA	NA
comp1079153_c0_seq1	NA	NA	0.03822	3.93446	-0.9574	2.03765	-5.44911	-1.60037	0.80779	-0.9574	0.24469	NA	-6.1719	0.33936	4.70803	-9.30724
comp107918_c0_seq1	0.27891	1.63592	-0.31416	NA	0.96615	-0.04122	NA	NA	NA	0.96615	4.93397	NA	NA	NA	NA	-0.33344
comp107919_c0_seq1	0.26998	NA	-0.15201	0.1288	2.48943	0.37201	0.1078	0.35441	0.16313	2.48943	-0.03041	1.92429	1.74478	0.32047	1.25692	-0.42497
comp107920_c0_seq1	0.2957	NA	0.48029	-1.16649	0.35812	-0.99093	NA	NA	1.25703	0.35812	3.36585	NA	-0.13587	0.99504	-0.6723	-6.4617
comp1079277_c0_seq1	0.94996	NA	1.17266	NA	NA	0.90547	NA	NA	0.80779	NA	NA	NA	NA	NA	NA	-0.33344
comp1079281_c0_seq1	-0.09245	NA	NA	-3.50568	-2.39346	-2.21042	-2.75958	-1.32953	NA	-2.39346	-1.81588	NA	0.41829	2.71595	-0.05501	-0.33362
comp107933_c0_seq1	0.16076	NA	-3.18441	0.49423	-0.49555	4.50688	-3.74291	0.55376	0.50474	-0.49555	-0.62098	NA	0.4545	1.28493	4.96811	-3.79909
comp1079341_c0_seq1	0.23076	NA	-1.95251	-2.64573	0.40929	-3.60249	-3.35941	-1.00724	-1.2425	0.40929	1.24228	NA	5.59571	1.72252	-4.58365	2.69449
comp107937_c0_seq1	NA	NA	NA	NA	NA	-0.55576	NA	-0.69392	NA	NA	-1.30602	NA	NA	NA	NA	3.30222
comp107940_c0_seq1	2.07471	NA	0.93016	0.2723	0.00931	1.53259	-3.35941	-0.04035	0.81565	0.00931	-1.45918	-0.72574	-0.41201	2.57213	-4.28975	-3.10862
comp107942_c0_seq1	0.04433	NA	1.39648	-0.25569	-1.99137	-2.59395	-4.75435	-0.79618	-0.15399	-1.99137	1.37204	2.45871	1.12154	NA	-4.40742	2.90704
comp107952_c0_seq1	0.17262	NA	1.15354	0.38267	0.15297	0.08272	-0.02369	1.85595	0.3366	0.15297	-0.14804	0.29231	-0.27866	1.56311	1.43471	0.05559
comp107956_c0_seq1	-0.25434	NA	0.87551	-0.58726	1.00091	2.47272	-2.14476	0.32136	0.50309	1.00091	-0.33785	-5.58257	0.03564	2.27177	1.03717	-3.23784
comp107961_c0_seq1	0.33091	NA	-0.8333	-0.65329	0.00569	-1.48235	-2.75962	0.32023	-1.30171	0.00569	-0.38877	-1.07023	-0.6009	-0.70881	-2.38718	0.00478
comp1079636_c0_seq1	-0.85509	1.61051	-0.38207	2.42057	-2.81046	-1.29307	NA	0.49255	-0.17406	-2.81046	0.1312	-3.91972	NA	0.72554	-0.13086	-1.16606
comp107978_c0_seq1	1.82092	0.85938	-0.5241	2.22551	0.25063	-0.76909	-3.35938	-0.25011	-1.60744	0.25063	3.33587	4.39297	0.19082	-1.0801	NA	-2.02481
comp107979_c0_seq1	0.12397	NA	-0.99126	-0.13155	0.20016	-0.07166	0.58604	0.29307	-1.60736	0.20016	0.4997	-1.11194	0.24464	0.38782	0.51995	-0.60384
comp1079869_c0_seq1	0.40989	NA	1.5469	0.13866	-0.18497	0.43852	-4.32175	0.24344	-1.74286	-0.18497	0.96152	0.99551	4.46844	-1.46607	0.43706	1.1391
comp107987_c0_seq1	-0.04169	NA	-1.98719	1.27851	0.45733	-0.04115	-2.75958	0.05118	-2.55741	0.45733	1.65746	-0.53524	-0.16226	NA	NA	-0.33343
comp1079926_c0_seq1	0.43778	NA	0.81811	-2.91883	-0.32993	0.18939	-3.35946	-0.28928	-2.32743	-0.32993	-0.49762	1.25451	-0.57919	-0.92631	0.17108	0.85138
comp107996_c0_seq1	-0.49513	NA	NA	NA	-0.28162	-0.04126	-0.61168	NA	-0.72885	-0.28162	NA	NA	0.18742	NA	-5.90199	NA
comp1080024_c0_seq1	-0.10312	NA	-0.42178	-3.78118	0.67282	0.16334	-4.33166	1.25564	-0.04831	0.67282	-2.57546	-2.51771	3.03169	0.36314	1.74685	-0.63382
comp10801_c0_seq1	0.59951	NA	NA	0.09724	NA	-2.82867	NA	2.26095	NA	NA	NA	NA	2.299	NA	-0.6723	-0.33351
comp108013_c0_seq1	0.1336	NA	-0.89925	NA	-0.34637	-1.1821	-0.5181	NA	-0.15399	-0.34637	NA	NA	1.9343	0.05949	-0.43515	0.09419
comp108015_c0_seq1	0.23546	2.10268	-1.07889	1.01064	-0.9574	1.64832	-1.21695	-0.82201	-0.05181	-0.9574	-0.14638	NA	0.95932	-0.44919	-4.68679	-0.24821
comp108017_c0_seq1	-0.39189	NA	NA	NA	0.00436	-1.87583	NA	0.06555	NA	0.00436	1.52297	NA	0.02775	-4.85707	NA	0.12581
comp108031_c0_seq1	-0.7039	NA	-1.3765	-0.24649	-1.82135	-2.07665	-0.8444	-2.94063	-2.07837	-1.82135	1.34831	-1.61928	0.08423	NA	-3.32994	1.42103
comp108034_c0_seq1	0.95273	NA	1.29908	-0.43451	-0.57221	1.67208	3.83084	-1.48388	0.85073	-0.57221	1.80548	NA	0.47311	NA	NA	-0.33381
comp108058_c0_seq1	-1.6827	0.55507	0.24211	-1.65609	1.49904	0.39032	2.83084	1.1197	0.08959	1.49904	0.64428	NA	-3.7288	3.72687	4.97525	-1.10518
comp108065_c0_seq1	0.05008	0.87024	0.0268	3.54525	0.96615	-0.36188	-4.92869	-0.54393	-1.39454	0.96615	-2.72056	NA	1.84016	1.04601	2.73617	-0.23858
comp108070_c0_seq1	-0.29096	1.89868	0.79052	1.85534	-0.38025	2.73906	NA	0.44676	1.82888	-0.38025	0.88765	-5.80171	NA	2.6456	1.44363	4.74756
comp1080736_c0_seq1	0.05851	1.63592	0.63829	-1.04244	NA	-1.27948	0.66974	-0.11397	-0.08065	NA	-1.07917	NA	-0.5861	-0.1821	-1.69109	0.04823
comp108093_c0_seq1	-0.0568	NA	NA	0.57583	1.01362	-1.54419	NA	0.54644	-0.70684	1.01362	-0.973	NA	-0.96759	1.71315	NA	5.25779
comp108094_c0_seq1	0.24598	NA	-0.25383	0.26082	-1.59803	-0.83754	0.41813	-0.54314	-0.07013	-1.59803	1.12365	-1.6141	-0.84435	0.56715	0.64864	0.0122
comp108095_c0_seq1	0.4	NA	0.2582	0.09725	NA	-0.68247	NA	-0.32776	-0.41002	NA	NA	-1.53934	NA	NA	NA	-5.5359
comp1080979_c0_seq1	0.63738	NA	-0.83836	1.41591	-0.47584	-1.01135	-2.75961	-0.12938	0.42057	-0.47584	0.5125	NA	3.03169	-1.20208	1.61437	1.04558
comp108099_c0_seq1	0.5995	0.56593	-3.1908	-3.20768	NA	NA	NA	NA	NA	NA	-0.01124	NA	1.45361	NA	NA	NA
comp1081255_c0_seq1	-0.04169	NA	-0.82458	-0.30446	0.41197	-1.92829	-3.35947	-0.80687	-4.47283	0.41197	0.89883	-0.90116	0.68955	NA	-0.6723	2.59173
comp108132_c0_seq1	0.14279	NA	0.18501	NA	NA	0	0.03669	NA	NA	NA	-1.47794	NA	NA	NA	1.47316	NA
comp108135_c0_seq1	-0.51474	NA	NA	-2.71425	NA	0.68999	-1.48508	1.09609	-0.15399	NA	0.95055	NA	-0.93606	NA	NA	-3.68115
comp108135_c1_seq1	0.2458	NA	NA	-4.18941	NA	-1.3613	-1.90418	1.83547	NA	NA	2.88753	NA	-0.31853	NA	NA	-3.26617
comp108139_c0_seq1	0.9201	0.54833	-3.11552	NA	-0.22646	1.66979	-0.61166	-0.41534	NA	-0.22646	2.71365	NA	-2.89252	-0.16361	-1.285	-0.33363
comp108140_c0_seq1	-0.5291	1.63592	0.81757	1.97877	1.17776	-1.81168	-0.63991	-1.72628	-1.23943	1.17776	1.9223	NA	0.02775	NA	-0.15786	-0.08144
comp108145_c0_seq1	0.27633	NA	0.46647	1.13557	-0.50888	0.1148	-0.80425	0.41392	-0.55488	-0.50888	-0.52336	-0.92112	0.38068	0.29094	-0.87505	0.24748
comp108146_c0_seq1	-0.06582	NA	-2.15452	2.73886	1.28161	-0.64115	-4.56658	0.04409	-0.87838	1.28161	-1.27863	-2.21665	-0.23291	1.71315	NA	-2.74746
comp108147_c0_seq1	NA	NA	NA	NA	NA	NA	NA	NA	NA	NA	NA	NA	NA	NA	NA	NA
comp108158_c0_seq1	NA	0.10636	NA	NA	0.69668	NA	-0.25824	NA	NA	0.69668	NA	NA	NA	NA	-4.85839	NA
comp108164_c0_seq1	0.22266	1.76205	-0.36125	1.88017	-1.27377	-2.60328	2.32009	-0.87081	-1.95732	-1.27377	2.22495	-0.94984	0.18018	1.75218	-0.64697	2.82534
comp1081705_c0_seq1	0.39213	-0.18802	0.86368	-0.39444	-0.94641	1.03617	-0.09169	0.1373	0.04718	-0.94641	-0.30767	NA	-1.12346	1.03618	-1.62321	0.29966
comp108186_c0_seq1	NA	0.7251	0.63829	NA	1.46368	NA	NA	0.15353	-2.584	1.46368	0.9505	NA	-0.57919	NA	NA	NA
comp108189_c0_seq1	0.04459	NA	-0.13741	-2.65542	-0.67596	2.05667	-0.43966	0.79564	-0.03896	-0.67596	-2.43637	0.25374	3.03169	0.55331	0.12024	-2.80577
comp108194_c0_seq1	NA	NA	NA	0.09719	NA	NA	-4.08803	3.10475	NA	NA	NA	NA	2.299	NA	NA	NA
comp108202_c0_seq1	0.14678	NA	1.13575	1.37286	1.15702	1.77808	-2.75957	0.26194	-1.07989	1.15702	0.22256	4.01268	1.00449	-0.62282	1.71635	-3.33367
comp108204_c0_seq1	-1.96906	NA	2.53336	0.37163	-0.20884	-0.44551	-3.74297	-0.0615	0.12844	-0.20884	-0.11994	NA	NA	0.32132	NA	0.78839
comp108208_c0_seq1	-0.47609	0.91998	-2.17193	1.64789	-0.95741	0.61947	-1.45631	0.12648	-0.53565	-0.95741	0.57306	NA	1.1003	0.66385	-0.27441	-1.00679
comp1082109_c0_seq1	-0.05787	NA	NA	-2.49769	NA	-1.27599	NA	-0.25155	0.3269	NA	-0.01124	NA	-2.03911	NA	-4.50563	0.64853
comp108211_c0_seq1	0.32876	NA	0.23793	-1.60025	0.28988	-0.10109	1.63697	-0.47988	-1.98237	0.28988	-0.23678	-3.0674	-2.89252	-0.83094	-0.3503	1.60151
comp108212_c0_seq1	0.78141	1.61051	-0.39782	2.64799	1.46954	1.33371	2.83091	-0.49477	-0.93592	1.46954	1.39321	0.07822	-0.32692	-3.7109	2.07245	1.96608
comp108214_c0_seq1	NA	NA	NA	NA	NA	NA	NA	NA	NA	NA	NA	NA	NA	NA	NA	NA
comp108218_c0_seq1	NA	-0.15566	0.78468	4.17124	-0.95742	-0.04125	NA	0.54644	NA	-0.95742	-0.01127	NA	-2.89252	NA	NA	1.78133
comp108218_c1_seq1	-0.36228	0.87024	NA	0.13095	NA	-0.04125	-0.61167	1.02734	NA	NA	2.18974	-3.31123	NA	NA	NA	-2.21407
comp108219_c0_seq1	0.40045	0.55507	-2.11418	0.23514	1.05822	1.14412	-2.75964	0.53444	-1.83336	1.05822	0.32254	2.22593	-0.80044	0.30435	2.78468	-1.17704
comp108220_c0_seq1	0.05737	1.07845	0.3779	NA	-0.65143	-0.97434	-0.61172	0.06555	-0.21975	-0.65143	0.95053	NA	-0.17572	-2.02926	-3.93041	-4.92581
comp108221_c1_seq1	NA	0.12072	NA	0.09722	0.98203	NA	NA	0.06555	0.2647	0.98203	-0.01126	NA	NA	5.05929	NA	NA
comp1082218_c0_seq1	-0.04169	1.61051	NA	NA	NA	-1.28115	-5.05357	1.81315	NA	NA	-0.01126	NA	NA	2.57213	-0.98165	-0.33379
comp108233_c0_seq1	0.45372	NA	-1.3836	2.66093	1.03158	-0.04128	NA	-0.41534	0.39519	1.03158	1.71929	-7.82229	-0.34553	3.6889	-0.6723	-4.21409
comp1082342_c0_seq1	0.27891	NA	NA	3.26139	2.42182	1.21965	NA	3.47176	-0.15399	2.42182	-0.01122	NA	-3.53721	NA	3.05356	-2.09339
comp108243_c0_seq1	NA	1.61051	1.46923	NA	0.69554	5.88179	-5.08957	-1.0318	-0.15399	0.69554	-0.58255	NA	NA	NA	NA	-6.53365
comp108245_c0_seq1	NA	0.56593	NA	-2.50134	-0.95741	NA	-2.75954	NA	-1.39742	-0.95741	3.38355	NA	3.61426	NA	-2.64684	NA
comp108246_c0_seq1	0.139	NA	0.63829	NA	-0.80633	4.45466	NA	NA	0.95763	-0.80633	-1.58333	NA	-0.31054	3.16073	NA	-3.84096
comp108253_c0_seq1	1.83412	NA	2.18962	-0.54039	1.51915	0.60945	2.83089	0.33782	0.19324	1.51915	1.55114	1.38133	-0.48026	NA	NA	-0.33369
comp1082583_c0_seq1	-0.1394	0.67436	1.69699	-1.4647	-0.9393	1.25934	0.65871	0.43408	-0.85192	-0.9393	0.87219	NA	-1.77166	-0.26519	0.24995	0.61088
comp108264_c0_seq1	NA	NA	0.5168	NA	-2.07194	NA	NA	NA	NA	-2.07194	NA	NA	4.3078	NA	NA	NA
comp108265_c0_seq1	-0.04168	-0.27428	0.90468	6.09802	0.56835	-0.09651	NA	-1.69442	NA	0.56835	NA	NA	-0.73645	-1.85301	NA	-0.3336
comp1082672_c0_seq1	0.29326	NA	1.10538	-1.46059	1.01344	1.01088	-0.61175	-1.3543	-0.91091	1.01344	-0.33259	0.07822	2.03834	-1.36874	0.27046	-0.6303
comp1082688_c0_seq1	0.3016	NA	NA	1.66114	NA	-0.123	NA	-1.60957	-1.3467	NA	4.54671	0.44129	2.03834	0.88257	NA	1.49835
comp108278_c0_seq1	0.14964	NA	-2.68324	0.37163	0.04089	0.11383	-4.32873	1.64489	-0.77977	0.04089	-1.28474	NA	2.299	0.14291	1.97423	-4.09242
comp1082856_c0_seq1	-0.22924	NA	0.63875	1.75396	NA	-0.68229	-3.35944	-1.61886	0.40364	NA	1.82645	NA	-4.1189	NA	NA	-0.33343
comp1082886_c0_seq1	0.86759	NA	-3.11379	-1.89572	0.4558	1.04468	1.92342	-0.958	1.50129	0.4558	-0.57614	-2.87363	-3.04892	NA	-2.82529	0.41593
comp108289_c0_seq1	NA	NA	NA	0.09724	0.62457	-2.84726	NA	0.57161	-0.15399	0.62457	2.05608	-1.5735	3.03169	NA	NA	1.42583
comp108295_c0_seq1	0.23279	NA	-0.62126	-0.85998	-1.16362	0.13532	-3.30783	-0.07923	2.71644	-1.16362	-1.81113	NA	-3.90002	5.33119	2.17655	2.21939
comp108303_c0_seq1	NA	NA	NA	NA	NA	NA	NA	NA	NA	NA	NA	NA	NA	NA	NA	NA
comp108304_c0_seq1	-0.49825	NA	NA	-2.50138	NA	-4.63079	-2.75962	-2.14643	-0.48884	NA	-0.94769	-4.26943	NA	2.71595	0.08397	0.65905
comp108320_c0_seq1	-0.24511	NA	NA	-2.50134	NA	1.67585	NA	-0.12709	-0.74284	NA	-0.88028	NA	-4.1189	NA	NA	0.56228
comp108322_c0_seq1	0.56096	NA	NA	NA	2.90702	-0.04121	-2.7596	NA	NA	2.90702	-0.01122	NA	NA	NA	-1.83298	NA
comp108326_c0_seq1	-0.39387	0.39241	-0.88391	-0.05222	0.10042	2.02445	1.3429	0.21121	-0.85372	0.10042	-0.54219	NA	-1.99561	1.94527	0.54892	-1.72982
comp108328_c0_seq1	-0.04169	NA	1.97003	2.41042	-0.61887	-1.32519	-0.61169	0.73654	-1.55147	-0.61887	1.63629	-4.26943	-1.07362	1.5788	NA	-0.55813
comp108329_c0_seq1	-0.4365	NA	0.37906	1.5817	-0.09868	-1.43175	-4.75831	-0.32806	0.40754	-0.09868	0.28383	-3.79946	2.299	3.09804	1.1666	1.90286
comp108332_c0_seq1	-0.04169	1.11139	-1.22473	NA	NA	1.0644	-4.92396	NA	NA	NA	0.39689	-5.5388	-3.56215	NA	NA	-1.30438
comp108333_c0_seq1	-0.27481	NA	NA	2.11222	NA	0.2458	-5.21191	-0.13952	-2.06411	NA	0.85943	NA	NA	1.17739	-3.23188	0.91555
comp108337_c0_seq1	-0.36176	1.87707	2.0674	-1.50651	0.20166	0.23927	-4.34025	0.53275	1.45	0.20166	-1.57406	-2.39895	0.40846	-0.93602	1.16187	0.30755
comp108347_c0_seq1	-0.1419	NA	NA	NA	-0.4043	0.09097	-0.61173	0.39523	0.11604	-0.4043	-0.20373	NA	-0.31526	0.66431	2.2694	1.5056
comp1083488_c0_seq1	1.21108	1.61051	0.87959	1.9461	1.03188	-0.17529	-2.76872	-0.4031	NA	1.03188	-0.37506	NA	1.22026	-0.10436	0.48184	-3.66278
comp1083660_c0_seq1	-2.22768	NA	NA	NA	NA	NA	NA	NA	-2.34194	NA	NA	NA	NA	NA	NA	NA
comp1083674_c0_seq1	0.14635	0.12072	NA	-0.79342	0.00437	-0.16313	-1.09946	0.54325	0.26509	0.00437	2.8706	NA	2.75184	NA	-4.23469	4.12078
comp108369_c0_seq1	NA	NA	-1.22473	NA	1.0057	NA	NA	NA	-0.70684	1.0057	2.22104	NA	-1.17181	NA	NA	NA
comp108371_c0_seq1	-0.36518	0.56593	1.44253	-3.46834	0.96616	1.49646	4.83094	-0.08228	0.80779	0.96616	-0.416	2.62476	0.21222	-4.40317	2.96961	0.50032
comp108374_c0_seq1	-0.15232	NA	NA	NA	-1.05319	0	NA	-0.41534	0.09245	-1.05319	0.87456	NA	-1.17452	-0.87256	2.86111	NA
comp108374_c1_seq1	0.08041	NA	NA	NA	0.96615	-0.04129	NA	NA	0.04437	0.96615	1.87978	NA	1.02846	-1.1062	3.73773	NA
comp108378_c0_seq1	-0.06325	NA	0.5168	1.28973	0.89391	0.04672	-1.29632	0.31247	-0.20068	0.89391	-0.14922	-0.16583	6.03457	-0.6556	-3.39657	0.71701
comp1083784_c0_seq1	0.25369	1.63592	-0.79745	0.11679	0.55355	-0.21724	4.78834	-0.98219	-0.64263	0.55355	-0.02691	-0.41337	0.12706	1.06096	0.6366	1.14887
comp108389_c0_seq1	-0.55225	NA	0.30794	-0.3713	-0.97954	1.03326	3.83092	0.40232	-0.11349	-0.97954	0.817	0.37847	0.38109	-3.46099	-0.18109	-0.22122
comp108395_c0_seq1	0.93374	NA	0.44126	-3.88624	0.86286	-1.0382	0.35832	0.79865	-0.72833	0.86286	1.6787	-2.77442	2.03834	1.71315	2.95064	-0.50554
comp1084008_c0_seq1	NA	NA	NA	NA	NA	NA	NA	NA	NA	NA	NA	NA	NA	NA	NA	NA
comp108401_c0_seq1	0.05855	1.63592	-0.2378	-1.22257	-2.56566	-1.06843	1.76667	-0.81312	0.65886	-2.56566	-0.30779	4.30051	2.21894	-1.15197	4.38564	0.42103
comp108403_c0_seq1	NA	NA	NA	NA	NA	NA	NA	NA	NA	NA	NA	NA	NA	NA	NA	NA
comp108406_c0_seq1	-0.48221	NA	NA	-2.56181	NA	0.90859	-0.61165	-1.83287	0.94032	NA	NA	NA	1.22026	-3.6017	-5.4258	-4.36336
comp108406_c1_seq1	-0.84484	NA	NA	0.5672	NA	0.7328	NA	NA	0.83878	NA	NA	NA	2.03834	-4.68206	-4.58375	-5.18198
comp1084213_c0_seq1	-0.60048	NA	0.6003	2.31162	0.00436	-1.69099	1.68294	NA	NA	0.00436	0.05573	NA	1.33878	1.20819	-1.9784	0.42272
comp1084220_c0_seq1	0.0152	NA	0.31639	2.1396	-0.48782	1.36512	-0.61169	1.91091	0.95923	-0.48782	0.5726	-0.22201	-3.90002	4.30295	0.61902	-2.20904
comp1084255_c0_seq1	-0.16521	0.85938	NA	2.99832	0.96615	-0.8972	0.11694	-0.44643	NA	0.96615	0.90455	NA	0.56982	-0.8747	4.02747	1.94952
comp108436_c0_seq1	0.35986	NA	1.46029	0.26022	0.61973	4.15712	-7.15992	-0.01391	3.2618	0.61973	-1.25611	0.24668	-3.78085	-2.79171	1.98988	-1.02686
comp108454_c0_seq1	-0.18173	NA	-1.62816	4.25316	1.20545	-0.04127	3.83089	1.53201	0.07209	1.20545	-1.39924	-4.26943	0.87689	0.94295	0.42531	-0.33347
comp108456_c0_seq1	0.09371	NA	0.21508	0.735	-0.13833	-1.76551	1.85873	-0.38705	-1.41783	-0.13833	-0.21304	3.03115	-0.16132	-0.4924	1.11514	0.96472
comp108459_c0_seq1	-0.4906	1.63592	-0.27549	-0.25617	NA	1.11619	-4.92518	-0.53974	-1.27843	NA	-0.44175	NA	-2.71677	-2.37183	0.23198	-1.04285
comp108464_c0_seq1	NA	NA	0.41046	NA	-0.2742	-0.04118	NA	NA	NA	-0.2742	NA	NA	NA	NA	NA	NA
comp1084727_c0_seq1	NA	NA	NA	NA	NA	NA	NA	NA	NA	NA	NA	NA	NA	NA	NA	NA
comp108480_c0_seq1	NA	0.63689	NA	NA	NA	NA	NA	NA	NA	NA	NA	NA	NA	NA	NA	NA
comp108496_c0_seq1	-0.63918	NA	-0.00451	0.79409	0.47619	-0.7466	-2.19873	0.50461	-0.63417	0.47619	-0.66342	NA	-1.40232	0.1277	0.44401	-1.81168
comp108512_c0_seq1	0.79715	0.55507	1.24561	NA	0.72223	0.05502	-0.35563	1.03989	0.25449	0.72223	-0.44967	NA	0.30207	0.74355	-0.64957	1.3152
comp1085128_c0_seq1	0.27891	NA	-1.19681	NA	0.89238	NA	NA	NA	NA	0.89238	0.08388	NA	NA	NA	0.93737	NA
comp1085197_c0_seq1	-0.0032	NA	0.09482	-0.58481	-1.57117	0.76537	-0.08483	0.10614	0.92258	-1.57117	-0.78319	-0.123	-1.24765	-0.44531	0.08189	0.36766
comp108528_c0_seq1	-0.47935	0.62974	-0.85896	0.86721	0.68709	0.8591	-4.5691	-0.25199	-0.16022	0.68709	-0.86032	-4.17254	3.17408	4.23427	0.63555	-2.36329
comp108550_c0_seq1	0.21304	NA	2.07468	-2.85823	-0.66092	-0.34951	-0.61173	-0.28191	2.22924	-0.66092	0.31702	NA	0.40282	0.56712	NA	-3.78869
comp108557_c0_seq1	-0.77288	NA	0.08028	-0.96121	0.00438	-0.17538	-0.6117	-2.65495	-1.09699	0.00438	-0.95718	NA	0.03564	2.72078	-1.38405	-3.18357
comp108564_c0_seq1	0.20319	NA	1.46156	-1.33741	-0.05157	0.48639	1.78014	-0.35428	-0.08942	-0.05157	-0.44586	0.15529	1.50979	-0.30577	1.76894	-1.09218
comp108569_c0_seq1	0.17121	0.55507	1.24063	0.42629	-1.90718	0.61275	-4.92229	-0.16775	-0.35747	-1.90718	-0.44803	-0.17955	0.1012	0.59785	-0.63386	-0.205
comp108574_c0_seq1	-0.36228	NA	0.63829	0.09725	NA	1.67094	-1.50035	1.87345	NA	NA	-0.98304	1.626	NA	0.06315	1.67011	-3.19574
comp1085749_c0_seq1	-0.68478	NA	NA	NA	NA	-3.01498	-0.61166	-1.85337	-1.30209	NA	0.92576	0.25374	-2.54623	NA	NA	4.91521
comp108579_c0_seq1	0.56078	NA	-1.09471	2.45988	0.23083	1.14077	-2.75954	0.02028	0.23012	0.23083	-0.22892	NA	-2.89252	1.17223	2.1341	2.59028
comp108587_c0_seq1	-0.85296	NA	2.56219	3.41449	0.00438	-0.04118	NA	0.27286	0.50189	0.00438	0.95052	-0.37162	3.71276	-1.31531	NA	2.39405
comp108589_c0_seq1	-0.36228	NA	NA	0.83047	NA	-0.08603	-4.32173	1.02734	-0.22333	NA	0.56398	NA	-0.00258	-1.08854	NA	-1.35306
comp1085903_c0_seq1	0.75556	0.85938	-0.56101	NA	-0.23018	0.00706	-0.69617	NA	-1.34927	-0.23018	0.24284	NA	2.16585	-3.17411	1.42049	-3.22686
comp108591_c0_seq1	-0.38497	0.87024	NA	-0.40763	0.96614	-1.6084	-1.39066	-1.57691	-1.27004	0.96614	1.35553	-7.76073	2.38081	-3.02802	NA	0.76999
comp1085946_c0_seq1	-0.39547	NA	0.63829	2.29538	2.48325	-1.34481	-0.61167	-0.22866	-1.30503	2.48325	-1.33945	3.06238	2.03834	-0.81871	NA	2.92854
comp1086043_c0_seq1	1.06834	NA	0.37145	-0.44086	1.90696	0.60943	NA	NA	-0.02431	1.90696	NA	NA	-0.68442	-1.1624	NA	3.24629
comp108609_c0_seq1	-0.31058	NA	0.90786	2.39474	-0.08961	-1.86929	-5.32081	0.39471	NA	-0.08961	3.09776	-0.36472	0.77638	0.10233	-5.00668	6.18315
comp108611_c0_seq1	0.25323	NA	-2.75954	4.85569	0.85674	-1.04742	-6.12896	0.63898	-4.51323	0.85674	2.23218	-2.38709	1.89866	1.72252	-0.21102	-1.77504
comp108613_c0_seq1	1.21986	NA	1.86783	2.38406	-1.56757	-0.75911	-3.35949	-0.73766	0.47746	-1.56757	-0.19784	0.29815	-1.65906	-3.75963	0.32526	3.97093
comp108626_c0_seq1	-0.20289	NA	0.11387	1.28813	0.66376	1.33863	-2.78065	-0.12424	-0.85231	0.66376	0.1521	-1.80529	-0.09497	-1.1208	4.37719	-0.54752
comp108628_c0_seq1	-0.41809	2.04943	0.63829	-0.09163	0.49581	1.42536	-0.61166	-1.24097	-1.22568	0.49581	-0.19147	NA	-0.63425	-2.82269	-3.32862	3.3849
comp1086326_c0_seq1	0.30395	NA	0.41029	4.54411	0.00504	-1.9785	0.09179	0.46234	-1.84623	0.00504	-0.46185	0.87339	2.03834	0.49908	1.38853	-0.86009
comp1086381_c0_seq1	-1.09175	1.63592	0.3762	0.12986	-1.78631	-0.10028	-0.61169	-0.27404	0.15468	-1.78631	-0.27866	-0.79051	4.10394	2.06708	1.41062	-2.4872
comp10867_c0_seq1	-0.43355	1.63592	0.67689	-1.35102	-0.06746	-0.16541	-0.61166	0.39424	1.47581	-0.06746	-1.11883	-2.38247	-4.53224	1.59479	-4.59433	1.50202
comp1086745_c0_seq1	-0.34633	0.69509	NA	-2.50134	NA	-2.41264	-3.74291	0.44649	-0.71866	NA	3.23339	NA	-1.81276	4.01022	-0.6723	-1.88516
comp108678_c0_seq1	NA	0.55507	-0.251	NA	NA	0.38251	NA	NA	NA	NA	NA	NA	-2.89252	NA	NA	4.18974
comp108680_c0_seq1	0.27891	NA	0.5168	0.7168	0.96614	1.77289	-0.61166	-1.65635	1.18645	0.96614	-0.97301	-5.87506	-1.56864	NA	2.93602	-0.33343
comp1086826_c0_seq1	0.33439	0.55507	-0.37944	0.2847	NA	-4.50279	3.34934	-1.63852	-3.03759	NA	-1.81448	-5.87857	0.25345	1.99293	-7.73787	4.17502
comp108685_c0_seq1	0.37952	1.63592	0.5168	-2.48555	0.00435	2.95289	-3.35947	-1.85775	0.78284	0.00435	-0.85032	-4.92852	0.54154	2.72078	-3.11321	-0.33353
comp108694_c0_seq1	-0.36421	NA	NA	1.06089	0.96614	NA	NA	NA	NA	0.96614	NA	NA	-3.53721	-2.93195	-1.83298	NA
comp1086945_c0_seq1	0.5403	NA	0.63829	2.51308	NA	NA	NA	NA	-4.78274	NA	3.61626	-2.98391	-2.89252	NA	NA	NA
comp108695_c0_seq1	-0.30429	0.56593	1.50787	-0.07795	0.44961	-0.38212	0.94522	-0.13442	-0.4779	0.44961	0.31816	-1.56591	4.75918	-0.92912	4.04324	-0.01613
comp108708_c0_seq1	NA	NA	0.63829	NA	NA	NA	NA	NA	NA	NA	NA	NA	NA	NA	NA	NA
comp108709_c0_seq1	0.14099	NA	8.04116	-0.08901	2.86268	8.10871	3.32205	-5.22783	5.43306	2.86268	2.67867	0.62839	-4.61272	0.4786	7.99621	-7.01042
comp1087177_c0_seq1	NA	NA	0.63829	NA	NA	NA	NA	NA	NA	NA	NA	NA	NA	NA	NA	NA
comp108723_c0_seq1	0.65496	-0.51346	0.58403	0.08265	2.4522	-0.68233	-0.61165	NA	NA	2.4522	0.92143	NA	0.02775	-2.93195	NA	1.37341
comp108728_c0_seq1	-0.41186	NA	1.17266	-1.41088	-0.95741	-1.82871	1.70225	-1.00715	1.72387	-0.95741	-2.752	-4.41898	-2.60307	-0.17023	-1.7685	1.2838
comp1087283_c0_seq1	0.16906	NA	1.2863	-2.19519	-0.79757	1.97737	NA	-0.19414	-1.58318	-0.79757	0.95054	NA	3.03169	NA	NA	1.34982
comp1087336_c0_seq1	NA	NA	-0.22209	0.37093	0.88679	-0.04128	NA	-0.02434	NA	0.88679	-0.85312	NA	NA	NA	NA	NA
comp108760_c0_seq1	0.51912	NA	0.37813	-1.45443	0.00438	-2.0566	0.67514	-0.28681	-1.29341	0.00438	1.62111	-1.93323	3.17408	-0.07123	3.07095	-1.12386
comp108779_c0_seq1	0.06385	-0.20951	-1.22473	-1.47074	1.49914	0.84122	-4.87013	-0.02435	2.70043	1.49914	2.05498	NA	-0.13815	1.66272	0.73689	-1.0668
comp108784_c0_seq1	0.37926	NA	0.27962	-0.82367	-0.85857	-0.17742	3.83094	-0.7031	-0.51035	-0.85857	-0.69071	NA	-4.63576	2.27086	-1.53072	1.96784
comp108790_c0_seq1	0.06921	0.25169	NA	-2.19205	NA	-0.38311	1.65449	0.52731	-1.36765	NA	-0.29292	NA	4.02805	-1.495	-1.13746	0.53599
comp108791_c0_seq1	-0.31955	NA	0.89991	-0.35809	-0.50518	0.98658	-0.61172	-0.70682	0.59897	-0.50518	-0.69836	-3.13483	0.41212	1.5085	2.00782	-1.68575
comp108795_c0_seq1	0.52788	NA	-0.43516	-0.1848	0.47379	2.28455	0.64558	-0.52406	0.58923	0.47379	-0.25886	0.09289	-0.65415	-0.56224	0.36121	-3.43991
comp108798_c0_seq1	0.10247	NA	1.83477	-0.35494	-0.76933	0.05515	-4.56553	0.17288	-0.43649	-0.76933	-0.36595	0.25374	-1.28043	NA	-1.38591	-1.86429
comp108800_c0_seq1	NA	0.12072	-1.36065	2.6902	0.19617	-0.71843	NA	0.97179	NA	0.19617	0.90652	3.16167	0.01835	NA	2.8229	-0.33357
comp1088039_c0_seq1	-0.39635	NA	-0.23371	-0.55	-1.58739	-0.1425	-3.74841	0.07097	0.83583	-1.58739	-0.71535	-1.72147	2.57538	1.54138	1.65546	0.01086
comp108809_c0_seq1	-0.42592	NA	-1.48831	0.21863	2.29707	0.05196	-3.76887	0.4588	-1.39026	2.29707	0.98673	-1.23867	2.61233	-0.39202	-3.17894	-4.54863
comp108810_c0_seq1	0.47227	-0.13452	0.14633	0.28086	-1.3293	0.84406	0.37	0.46745	1.01644	-1.3293	-1.0582	-0.10084	-0.62979	0.11178	0.25505	-0.54373
comp108811_c0_seq1	-0.21575	0.66618	-2.16406	-0.53973	0.96615	2.11833	0.36443	-0.20319	-0.24217	0.96615	-0.86827	NA	NA	0.36543	1.10747	-1.56034
comp108815_c0_seq1	-0.34831	NA	0.48797	NA	-0.08736	0.30911	-1.48692	0.06555	0.29738	-0.08736	2.10214	NA	4.83455	NA	-0.23747	-5.78111
comp108817_c0_seq1	-1.18859	NA	1.23828	1.58028	0.00437	2.73055	-5.45522	-0.61095	1.04392	0.00437	-0.28389	-2.07262	-2.89252	-2.02926	0.36373	-3.23737
comp108818_c0_seq1	0.45475	NA	0.57711	1.75048	0.66189	-0.60338	-1.90348	0.34751	-0.15142	0.66189	1.02874	1.20549	3.14822	0.45163	0.0858	0.54746
comp108838_c0_seq1	0.33683	NA	-1.20104	0.5266	-0.95741	-1.92768	NA	NA	-1.12807	-0.95741	NA	NA	NA	2.94395	-0.53936	0.83513
comp108845_c0_seq1	0.57481	NA	3.96699	-3.10978	0.01805	0.10671	0.09483	-0.85593	0.55797	0.01805	-2.99094	-4.00706	-1.44086	0.81143	-1.40064	0.32753
comp108847_c0_seq1	0.27891	NA	NA	0.09725	0.96615	-2.2958	-0.61169	NA	NA	0.96615	-0.97296	NA	NA	2.72597	NA	3.12128
comp108862_c0_seq1	0.25695	NA	1.47706	-1.17395	0.8905	1.69848	-7.21113	0.84876	0.51841	0.8905	-0.83145	-9.48945	-2.39849	4.40143	-0.25665	-2.72979
comp1088681_c0_seq1	0.2429	2.22557	-1.79311	0.98373	0.70047	1.25216	NA	1.7571	0.62954	0.70047	-1.59166	NA	2.299	0.70338	-3.14892	-0.3335
comp1088696_c0_seq1	-0.10607	1.61051	0.91817	-1.54345	0.42525	0.81796	-0.61172	0.30401	-0.11792	0.42525	0.69385	0.54546	-1.96921	-0.68433	-0.16008	0.17438
comp1088713_c0_seq1	NA	NA	NA	NA	NA	NA	NA	NA	NA	NA	NA	NA	NA	NA	NA	NA
comp108874_c0_seq1	NA	NA	NA	NA	NA	-0.92982	4.41586	NA	NA	NA	NA	NA	0.62496	NA	-1.32638	-4.45758
comp1088773_c0_seq1	-0.88587	0.84482	NA	0.12414	-0.9574	2.45937	NA	1.9297	-0.15399	-0.9574	-2.68863	NA	-5.53147	3.70355	-4.30799	-0.33354
comp1088787_c0_seq1	-1.03442	NA	-2.16239	NA	NA	NA	NA	NA	NA	NA	NA	5.19619	NA	NA	NA	NA
comp108888_c0_seq1	-0.46949	NA	-0.50747	0.43282	-0.86896	0.59178	-0.3084	-0.4161	2.87873	-0.86896	-0.56594	-0.37255	-2.54623	0.33903	-0.37234	-2.1732
comp108894_c0_seq1	-0.00686	0.0836	1.3061	-0.28404	1.85592	2.74071	-0.61165	1.14033	0.80779	1.85592	-0.83036	-5.90791	-1.59796	-3.17411	-0.13592	-2.28963
comp108904_c0_seq1	0.32123	0.41782	-0.06694	-1.12756	0.27794	0.8484	-4.93006	-0.19287	-0.62389	0.27794	-0.75556	0.21487	4.34935	-1.32078	1.31841	-0.4241
comp108915_c0_seq1	-0.17492	1.89868	NA	-0.277	NA	-0.05819	-0.17306	-0.35655	-0.43641	NA	-0.33249	NA	-0.00258	1.6988	0.29797	-0.70367
comp108919_c0_seq1	-0.3053	NA	0.25585	0.30574	-0.41511	0.10153	-1.63305	0.10402	-0.87243	-0.41511	0.34338	-0.60989	-0.93606	-0.94429	0.65257	-0.36781
comp108927_c0_seq1	-0.43565	-0.19345	-0.94498	4.74652	1.35722	-7.17623	0.30297	-2.60975	-3.1183	1.35722	4.79059	2.6697	0.28528	-3.59674	-1.39904	0.96332
comp1089310_c0_seq1	0.48086	NA	NA	-4.50605	NA	-1.19546	-4.32176	0.46696	-1.58875	NA	1.00612	NA	3.71276	2.42868	-0.6723	1.65942
comp1089372_c0_seq1	0.51498	0.55507	NA	0.44019	NA	1.88162	-2.1168	0.35406	-0.84188	NA	0.46363	-3.91972	-0.27866	0.85512	0.3643	-2.8406
comp108943_c0_seq1	0.09741	NA	-2.78216	-0.74568	-0.64461	-0.68502	-1.58636	0.20522	-0.90498	-0.64461	0.23128	1.95703	0.12311	-0.64143	-1.19232	2.62776
comp1089442_c0_seq1	NA	NA	0.63829	2.66097	2.45221	NA	NA	1.31166	NA	2.45221	0.85809	NA	NA	2.72597	NA	NA
comp108957_c0_seq1	-0.13073	NA	1.74616	1.67996	NA	0.06119	-4.7336	0.42158	0.39305	NA	-0.49907	NA	2.299	-5.949	-3.29509	-0.08329
comp1089620_c0_seq1	-0.99403	0.55507	NA	NA	1.87535	0.93204	-3.35884	0.29348	NA	1.87535	0.39108	NA	-0.5861	-1.3979	-0.2172	3.3123
comp1089638_c0_seq1	0.23599	NA	0.46281	0.28795	-1.34617	1.27088	-3.76085	-0.41351	0.27818	-1.34617	-0.31053	NA	0.78577	-1.11933	0.93042	0.68256
comp108966_c0_seq1	NA	NA	4.12147	5.43694	0.52037	7.15543	-3.7759	-3.91034	NA	0.52037	-0.77931	NA	-2.40024	NA	6.4186	-7.58551
comp108970_c0_seq1	-0.03076	NA	1.36661	-4.83177	0.35557	1.07085	-0.61173	0.38199	0.63837	0.35557	0.84464	0.25374	1.00449	0.91144	-2.55428	-4.18395
comp1089768_c0_seq1	-0.39472	NA	NA	-3.35369	-0.39194	1.93678	-2.75959	-0.58176	-0.5358	-0.39194	-1.43616	NA	2.03834	0.31511	3.42605	-4.9685
comp1089776_c0_seq1	-0.53457	NA	-1.78604	2.66094	0.02789	0.20377	-0.61174	0.78132	-0.26054	0.02789	0.96818	NA	0.68955	0.84714	1.05594	-1.4836
comp1089812_c0_seq1	NA	0.55507	NA	-0.6625	NA	2.51992	NA	-0.61385	NA	NA	-0.27501	-0.4274	NA	-0.25749	NA	4.11919
comp108986_c0_seq1	-0.31759	1.12213	-0.2784	0.78156	0.53695	1.30788	-3.33949	-0.36155	-1.89441	0.53695	-0.10827	NA	1.05554	-0.99348	2.75097	-0.21208
comp108992_c0_seq1	-0.07525	-0.35169	-0.11907	-2.28308	-0.10753	-0.62739	0.89362	0.07743	-0.84053	-0.10753	-0.42782	-1.56365	0.36089	0.43396	-0.73789	1.00766
comp108994_c0_seq1	-0.04169	NA	NA	NA	NA	-0.0419	2.69761	-1.07284	-0.15399	NA	-0.01124	1.56481	3.89176	NA	0.94947	1.40821
comp108997_c0_seq1	1.92598	NA	-1.07889	NA	-0.55052	-0.11249	1.08414	-0.5477	0.30066	-0.55052	2.16091	-3.79946	-1.40232	-2.18749	1.44363	-3.48175
comp1090068_c0_seq1	0.12043	NA	NA	-1.01592	0.00435	1.8607	-0.61176	0.69992	-1.01537	0.00435	0.04677	-3.79946	3.71276	2.32667	-1.44815	-2.87078
comp109007_c0_seq1	NA	0.83396	-0.27285	0.09721	-1.54451	0.06875	-0.61166	-1.20043	0.10734	-1.54451	-1.65463	NA	3.71276	-2.25012	NA	-0.33361
comp1090076_c0_seq1	NA	1.61051	-1.79767	NA	-0.55104	NA	NA	1.48639	NA	-0.55104	2.89273	0.25374	2.38189	NA	NA	NA
comp109009_c0_seq1	0.34299	1.61051	-0.34733	-0.86785	1.15935	-0.28626	2.2379	0.40848	-0.15881	1.15935	0.47721	NA	-0.09598	-4.04537	1.02413	-0.8882
comp109019_c0_seq1	0.11	NA	1.35787	-1.79381	0.00438	0.9596	-4.34343	0.11618	0.33516	0.00438	-1.2198	-2.24802	2.16585	0.80259	1.31713	0.48747
comp109038_c0_seq1	-0.32179	1.11139	-0.63021	2.98639	0.76605	-0.26611	-0.61166	0.35849	0.51368	0.76605	0.4454	NA	0.62774	-0.93478	-0.80206	-5.06942
comp1090397_c0_seq1	-0.29805	0.68537	-0.20092	1.31149	1.207	-1.31743	-5.6984	-0.26959	NA	1.207	1.15045	NA	0.65231	1.29462	-5.75237	6.65551
comp1090605_c0_seq1	0.64073	NA	-0.09611	0.59303	2.71267	1.21204	-3.74425	0.3797	-0.20185	2.71267	0.88836	-3.79946	-1.49329	3.67414	2.26007	-2.31938
comp109063_c0_seq1	-0.03476	NA	0.5168	-2.92523	-0.9574	2.69653	-2.83705	0.99121	1.6658	-0.9574	-2.66712	-0.88377	1.03516	2.71595	2.99995	-0.33358
comp109077_c0_seq1	-0.5549	NA	-1.49574	0.48064	0.01901	-0.08561	-4.33303	-0.46157	1.06804	0.01901	-0.81331	1.73533	-1.28043	1.15023	-2.44307	1.76104
comp109085_c0_seq1	0.26889	0.11534	-0.28951	4.09201	-2.31762	0.11301	NA	0.06555	-0.15399	-2.31762	0.35671	NA	NA	3.6455	3.39105	-6.18002
comp109091_c0_seq1	-1.00543	NA	-0.68345	1.02267	-0.4652	0.06971	-2.81664	0.26538	-1.58395	-0.4652	1.31102	NA	-2.54623	NA	1.44363	-1.02388
comp109093_c0_seq1	NA	NA	NA	4.66561	3.20337	4.70275	-0.61165	-0.968	-0.70684	3.20337	-0.01122	NA	3.03169	NA	NA	-4.29033
comp109094_c0_seq1	-0.24208	NA	-0.08821	-0.43502	-1.36634	-0.14458	1.97697	0.4421	-0.6547	-1.36634	-0.41591	NA	1.07082	-0.0034	0.67886	-0.58128
comp1090952_c0_seq1	-0.23722	NA	1.58215	-1.19876	-0.86756	-0.80981	1.11117	0.02073	-0.56656	-0.86756	0.71217	-1.28794	1.02846	0.10923	-1.53649	1.85099
comp109097_c0_seq1	0.29604	-0.16302	-0.2938	0.09725	0.96615	1.47476	-0.61165	0.34727	0.3269	0.96615	0.17979	NA	-0.31853	-0.03783	NA	2.05193
comp109102_c0_seq1	-0.12125	1.87707	NA	3.5239	-1.20162	-3.78033	-6.30119	-0.26861	0.56199	-1.20162	0.42307	NA	-1.17181	-5.13397	-0.67883	-1.4652
comp109104_c0_seq1	-0.48214	NA	-0.27364	NA	-1.14987	1.64975	-1.29336	NA	-2.18399	-1.14987	1.35807	NA	-1.83021	5.68548	-5.02062	-7.0056
comp109113_c0_seq1	NA	NA	-1.22473	NA	-0.9574	NA	NA	NA	NA	-0.9574	NA	NA	NA	NA	NA	NA
comp109123_c0_seq1	-1.24472	NA	NA	0.58416	1.48983	-0.12018	-0.87286	NA	-2.15424	1.48983	-1.00836	NA	0.88763	-1.22962	NA	5.97477
comp109127_c0_seq1	-0.08304	NA	0.63829	NA	NA	1.71956	NA	NA	0.41256	NA	1.86964	NA	0.46106	-1.5055	0.48184	0.04656
comp109135_c0_seq1	0.0788	NA	-0.41998	2.42903	-0.56875	-0.62099	-0.92324	0.28562	1.19461	-0.56875	-0.19318	0.37847	-2.89252	0.48606	0.11297	-1.49901
comp1091358_c0_seq1	0.0394	NA	-0.2468	-0.05965	1.87643	-1.09092	1.01935	0.3317	0.36252	1.87643	0.41337	NA	NA	2.48074	1.04716	1.27486
comp109136_c0_seq1	-1.71564	NA	1.58215	5.05187	-0.58578	3.28881	-0.61175	0.54644	1.2679	-0.58578	0.2553	0.25374	-0.68088	NA	1.44363	-4.14576
comp109144_c0_seq1	NA	NA	-1.07889	0.04974	-0.30436	NA	-3.35938	2.66861	-1.91691	-0.30436	2.87024	NA	5.71913	NA	NA	NA
comp1091482_c0_seq1	-0.15332	NA	0.02379	-2.54011	NA	0.30516	-4.74452	-0.25371	-0.11025	NA	-1.03265	-1.95354	-1.22338	1.6588	-2.40337	0.02582
comp109149_c0_seq1	-0.05596	NA	NA	3.99776	1.57352	0.52138	-3.74299	-0.56306	0.97205	1.57352	-0.83531	NA	0.88763	0.3245	-5.34914	1.58129
comp109168_c0_seq1	1.44936	NA	0.28777	1.37699	0.00438	-0.11819	0.08799	1.12005	0.02527	0.00438	-3.47212	-6.79484	NA	NA	-0.6723	-0.51051
comp109174_c0_seq1	0.61978	NA	NA	-0.92177	NA	2.3892	-4.95409	-0.46804	-3.44691	NA	0.95572	NA	-2.05159	-3.51529	-0.6723	-0.33357
comp1091765_c0_seq1	0.27891	0.55507	-1.22473	2.4524	0.57623	0.60025	-0.61165	NA	NA	0.57623	0.62476	NA	2.03834	NA	1.44363	-3.84919
comp109192_c0_seq1	0.27891	1.89868	-1.60567	4.00037	0.96615	1.97236	NA	-0.4787	0.3269	0.96615	0.83767	NA	0.03564	-1.49219	-1.83298	1.52842
comp109196_c0_seq1	0.12069	-0.43012	-0.61498	NA	-0.03223	-0.18706	0.07951	0.11377	-0.09164	-0.03223	-0.01088	-5.03947	NA	0.37029	-2.0842	1.5309
comp109198_c0_seq1	-0.05727	NA	-1.07889	3.54537	0.22929	-1.28236	-4.96068	0.46755	-1.29742	0.22929	-1.0099	1.74426	0.88933	NA	0.1055	1.42107
comp1091991_c0_seq1	0.24122	NA	1.23512	-2.19208	NA	-1.32199	-0.61176	-1.88425	0.69059	NA	-2.41716	-5.10457	NA	1.34054	-1.285	1.07465
comp109202_c0_seq1	-0.55469	NA	NA	-2.19205	0.91665	0.74495	-3.00676	-2.3411	0.37255	0.91665	1.14507	NA	NA	-0.05852	-6.79842	-1.0228
comp109203_c0_seq1	0.26967	NA	0.83581	-2.1886	0.00435	0.23313	-0.61177	-0.39781	-2.92287	0.00435	2.04119	NA	0.26764	-0.10195	2.78086	0.43322
comp109206_c0_seq1	-0.04168	1.85499	NA	0.13126	NA	0.79583	-0.61169	-0.10583	-1.80107	NA	-2.38938	NA	3.03169	-2.93195	-2.55755	-1.47976
comp109214_c0_seq1	0.0799	0.56593	2.12518	-1.2397	-0.4302	-1.61435	3.5781	0.15618	-0.11105	-0.4302	0.42739	-1.11306	0.31501	1.72252	-1.40592	-0.3216
comp109217_c1_seq1	-0.14995	NA	-2.48752	NA	0.42769	NA	NA	NA	1.77427	0.42769	-0.01124	NA	NA	0.54507	-0.6723	NA
comp109221_c0_seq1	-0.48634	0.56593	0.32702	1.33219	1.48147	-5.27918	4.54946	-0.22322	0.56733	1.48147	1.68545	-1.10567	NA	2.72597	-3.6285	5.30804
comp109235_c0_seq1	-0.27636	NA	-0.65869	-1.03827	0.39483	-2.61616	-0.61176	0.10268	-0.59266	0.39483	0.8653	1.06116	1.65488	-0.00701	-1.56835	0.81298
comp1092554_c0_seq1	NA	NA	NA	NA	NA	NA	NA	NA	NA	NA	NA	NA	NA	NA	NA	NA
comp109258_c0_seq1	-0.26813	NA	-0.46489	-1.16407	0.01005	-0.2742	1.4187	-0.13185	-0.23237	0.01005	-0.09603	NA	0.52469	2.71595	1.45937	0.52663
comp109259_c0_seq1	-0.25595	0.55507	-2.64746	-0.96391	-1.15146	0.83314	-4.76498	1.24229	2.80345	-1.15146	-3.36993	-3.48224	-2.30363	3.95556	-6.07581	2.11806
comp109261_c0_seq1	-0.1514	NA	NA	NA	NA	-3.49127	-4.32175	-0.29351	-0.70684	NA	NA	NA	0.03589	NA	-1.33467	1.76053
comp1092624_c0_seq1	NA	NA	NA	NA	NA	NA	NA	NA	NA	NA	NA	NA	NA	NA	NA	NA
comp109263_c0_seq1	0.71346	NA	NA	3.30502	0.59318	0.08764	2.83085	0.67884	-0.15399	0.59318	2.12768	1.39041	2.21894	1.71315	-0.6723	0.16231
comp109277_c0_seq1	-0.17794	NA	0.63829	0.06234	0.70772	-2.82743	-0.61178	-0.968	-0.15399	0.70772	1.44791	NA	0.55289	2.72078	0.61305	-1.38446
comp109281_c0_seq1	NA	1.61051	1.93752	4.84393	1.32325	-0.75063	-0.61175	-0.41494	-2.18325	1.32325	2.74472	NA	-0.57919	NA	0.0141	-0.33344
comp109283_c0_seq1	-1.67421	NA	1.08548	0.87066	-0.7049	-2.50943	-0.61169	0.28591	-1.37804	-0.7049	0.54181	-1.24969	-1.58019	1.71315	1.44363	-0.33363
comp109286_c0_seq1	0.16525	NA	0.75491	-0.61539	3.43562	1.56119	0.60245	0.03465	-0.53834	3.43562	0.64437	-1.38201	-0.27866	-0.36896	2.00369	-1.66234
comp109296_c0_seq1	-0.21674	1.63592	0.00961	3.54215	-0.24203	1.6389	0.27865	1.89386	0.26237	-0.24203	1.97174	-3.24187	-0.8087	-1.54414	0.67712	-1.6434
comp109298_c0_seq1	0.62562	NA	NA	4.08916	0.20387	-2.63608	NA	0.63288	-1.68828	0.20387	3.24091	NA	-2.53652	0.20986	-3.5687	5.66089
comp109311_c0_seq1	0.03284	0.41067	NA	-0.35445	0.00089	-0.39993	-0.61171	0.80716	-0.06726	0.00089	-0.30316	0.7406	NA	-0.21481	-1.1772	1.42072
comp1093148_c0_seq1	0.59958	NA	NA	2.42137	NA	-0.68232	-2.75954	NA	1.82343	NA	2.59813	NA	NA	0.34195	2.96961	-0.33358
comp1093166_c0_seq1	-0.04169	NA	NA	NA	NA	1.80139	-0.61176	NA	NA	NA	NA	NA	-2.17098	NA	2.39208	-5.00141
comp109331_c0_seq1	0.48437	NA	-1.96103	-0.53464	0.25496	0.65191	-1.49334	0.36942	-4.39635	0.25496	0.38447	NA	-0.23643	0.3969	0.48184	-1.57654
comp109337_c0_seq1	NA	NA	NA	NA	NA	NA	NA	NA	NA	NA	NA	NA	NA	NA	NA	NA
comp1093424_c0_seq1	-0.20379	0.56593	NA	-1.46864	NA	-0.98722	-0.61176	0.48756	-1.87474	NA	-0.03565	NA	-0.96759	-2.918	-1.85786	1.69307
comp109351_c0_seq1	0.38672	NA	NA	NA	NA	-0.47525	-0.32114	NA	0.3269	NA	-0.04996	NA	0.03564	-0.56057	-3.5018	1.84598
comp1093531_c0_seq1	-0.52724	NA	-1.00915	-1.24574	-0.95742	-1.02611	-0.30304	0.8484	0.26562	-0.95742	0.06796	NA	0.65778	-3.17411	-1.6485	-0.40432
comp1093778_c0_seq1	0.6094	NA	0.55974	-0.22553	-0.59155	-1.11263	0.66271	0.75394	-0.24638	-0.59155	0.08643	0.45379	0.69628	0.20022	-1.08222	1.01473
comp109378_c0_seq1	0.05254	0.41782	-2.04616	-1.6698	1.00528	-7.37946	3.50467	0.58436	-0.29208	1.00528	0.6241	0.58325	-0.12128	4.605	-5.30213	6.86786
comp109380_c0_seq1	-0.36228	NA	-1.07889	NA	NA	NA	NA	NA	NA	NA	NA	NA	NA	NA	NA	NA
comp109398_c0_seq1	-0.18527	NA	-0.30615	-1.80676	1.2374	0.32456	1.67944	0.11994	0.36182	1.2374	-0.54121	-1.41895	0.75915	-0.35907	-0.13454	1.35538
comp1094044_c0_seq1	0.01943	NA	NA	0.69813	0.86236	0.16567	-1.30033	0.13465	-0.34182	0.86236	-0.96367	NA	0.60095	-1.04544	-2.27248	0.86886
comp109405_c0_seq1	-1.93146	NA	2.19338	1.21972	2.46818	-3.47123	-3.35941	0.67724	0.85547	2.46818	1.88871	-8.03579	1.49183	NA	4.58096	2.95607
comp109419_c0_seq1	-0.23616	NA	0.21121	0.13242	0.27913	-0.88946	-3.76615	0.59249	-2.12663	0.27913	-0.50908	2.40581	-0.65214	-0.97526	0.15291	0.91698
comp109437_c0_seq1	-0.42999	NA	NA	3.45763	-1.80776	-1.09658	0.64663	0.15881	-1.43443	-1.80776	-1.55274	0.37847	-0.10051	-2.03803	-1.66314	2.50586
comp1094495_c0_seq1	-0.236	NA	0.31954	-4.59786	0.00885	0.20469	-3.76728	-0.10982	-2.97567	0.00885	-0.83203	1.92429	NA	1.10993	-1.92652	-0.8407
comp1094539_c0_seq1	0.18536	NA	0.14295	-1.49238	0.07083	-2.03211	1.68295	-0.36505	-2.16363	0.07083	0.93754	-1.98846	2.12837	1.03196	-0.37163	1.16373
comp1094672_c0_seq1	0.14479	NA	NA	-1.50916	-0.95741	1.61795	-0.40791	-0.27212	0.08518	-0.95741	-0.79375	-3.99764	-0.57919	0.63669	-1.46313	0.28407
comp1094716_c0_seq1	0.16456	NA	1.35715	2.69502	0.5602	0.70127	-4.96072	-0.15997	-1.81379	0.5602	1.35333	-1.86074	1.00449	NA	NA	1.85886
comp109473_c0_seq1	0.16081	NA	-0.14135	0.80547	0.26081	-0.66186	-0.40537	0.08621	1.26367	0.26081	-1.73416	NA	-0.68939	1.53786	-4.67947	1.95058
comp109479_c0_seq1	-1.45171	0.55507	-0.24382	-1.58016	-0.69432	0.69517	-2.76887	-0.35637	0.29531	-0.69432	-2.95986	0.39885	3.03169	-5.63532	3.17404	1.3929
comp1094839_c0_seq1	-0.15945	NA	-1.51206	2.98605	0.96825	0.5462	-5.65818	-0.18821	-0.00023	0.96825	-0.64249	2.5554	1.00449	-2.62403	0.3479	-5.41644
comp109497_c0_seq1	0.22888	1.61051	-0.51763	1.92269	0.12733	2.46614	-6.08663	-0.17476	1.04697	0.12733	0.75477	1.27633	2.21894	0.80909	0.301	-2.82134
comp10950_c0_seq1	NA	NA	NA	NA	NA	NA	NA	NA	NA	NA	NA	NA	NA	NA	NA	NA
comp109541_c0_seq1	0.9201	NA	NA	2.42055	-2.40367	2.20184	NA	0.06555	-0.363	-2.40367	-0.01128	NA	1.64558	NA	NA	-3.79894
comp1095645_c0_seq1	NA	NA	2.40249	0.45722	1.00297	3.40229	NA	-5.03412	8.19565	1.00297	-2.6876	NA	-2.42202	NA	NA	-0.33364
comp109571_c0_seq1	-0.36228	0.87024	1.58215	0.13115	1.87721	-0.04118	NA	1.01654	-0.31923	1.87721	-1.79334	NA	-2.54623	NA	NA	3.51906
comp109603_c0_seq1	-0.02809	NA	1.47371	-0.31808	-0.00114	-0.24059	0.45426	-0.16328	2.28877	-0.00114	-3.29512	-4.91427	2.299	2.63755	2.65554	-0.22939
comp1096062_c0_seq1	0.74127	NA	0.26531	-0.23714	0.00782	1.9776	-2.75963	0.1688	-0.94551	0.00782	-0.72293	0.37847	-0.4121	-1.31708	0.48184	-1.47622
comp10961_c0_seq1	-0.10458	NA	0.21596	0.38845	0.44552	0.86911	-1.12534	-0.61687	-0.47786	0.44552	-0.03961	2.31739	4.34935	-1.16349	-3.22809	-0.44547
comp109613_c0_seq1	0.5995	0.41782	-0.2938	3.53948	1.85502	6.69151	-0.61173	0.23484	-0.15399	1.85502	-1.37416	NA	-5.33899	NA	NA	-9.80884
comp109619_c0_seq1	0.19412	NA	0.236	1.8868	-0.2379	0.11179	-1.55807	0.01727	0.01145	-0.2379	0.17594	0.8049	0.69534	0.27958	0.58234	-1.43089
comp1096319_c0_seq1	0.5995	0.84482	NA	1.58621	-0.41908	-3.84916	2.83095	NA	-2.68145	-0.41908	2.2307	1.83451	3.89176	NA	NA	2.61251
comp109632_c0_seq1	-0.66999	0.56593	NA	-0.80457	0.00436	-0.0412	NA	-1.40369	NA	0.00436	-0.56983	0.26418	0.65778	-0.03752	NA	1.42123
comp1096356_c0_seq1	0.27891	0.56593	-1.37909	NA	0.96615	-0.04121	-2.75963	1.34398	NA	0.96615	-3.1128	NA	NA	NA	NA	NA
comp10964_c0_seq1	0.04326	NA	-0.01438	-0.6579	0.00435	-1.36012	4.83087	-0.48976	0.16762	0.00435	-1.73085	2.90236	2.03834	0.46256	4.82827	-0.77699
comp109642_c0_seq1	-0.77464	0.03809	0.63829	0.35315	2.4236	-0.38565	-3.74291	-0.1598	-0.27394	2.4236	-0.97301	NA	3.17408	-1.26376	NA	4.18453
comp109651_c0_seq1	NA	NA	1.91085	NA	-0.64397	NA	NA	NA	NA	-0.64397	2.49999	NA	0.27734	NA	NA	NA
comp109657_c0_seq1	-0.4092	NA	-2.48752	-1.24056	-0.0855	-0.80874	5.63829	0.00943	-0.50882	-0.0855	0.09847	NA	0.02775	-2.28448	-0.81471	1.9627
comp109668_c0_seq1	0.13736	NA	NA	NA	0.34658	NA	-4.37039	-0.03667	0.04143	0.34658	NA	NA	NA	NA	NA	NA
comp109669_c0_seq1	-0.19926	NA	0.0193	-2.70873	-0.95741	-0.12319	0.11305	-0.15652	-1.00438	-0.95741	-0.04738	-1.69896	-1.8664	1.18129	2.10542	0.19899
comp1096790_c0_seq1	NA	-0.43882	NA	-0.92285	NA	-0.65736	-3.74291	-0.25108	-0.15399	NA	-0.50352	NA	NA	NA	NA	-1.07009
comp10968_c0_seq1	-0.00162	0.55507	0.65547	-3.98887	0.6069	-1.36231	-0.61168	0.89081	0.3269	0.6069	1.60993	NA	0.72308	NA	0.19392	-4.36465
comp109680_c0_seq1	0.2943	NA	0.37214	1.11701	-1.0948	-1.08092	-0.04433	0.33574	0.04976	-1.0948	-0.58742	-6.50007	-0.11692	0.5709	-0.50332	0.35736
comp109684_c0_seq1	-0.44475	NA	0.5168	0.22547	-1.58154	0.91463	-0.61169	0.18447	0.57452	-1.58154	-0.20206	0.37847	-0.80044	-1.22402	-0.40034	-0.59195
comp109687_c0_seq1	0.18796	NA	0.71308	-0.59277	-0.9574	-2.21232	0.33849	0.56072	0.25322	-0.9574	1.33418	-4.09087	-0.48763	4.83192	0.26172	1.52138
comp109692_c0_seq1	-0.28064	1.5361	0.63829	-2.20564	0.42877	-0.47029	-0.6993	0.70883	NA	0.42877	0.75207	0.25374	NA	-1.62501	3.7044	1.71085
comp109692_c1_seq1	-1.59474	0.55507	0.63829	0.35564	0.98449	-0.03774	-0.62673	1.31147	-0.15399	0.98449	0.57583	NA	NA	-0.40318	1.44363	1.82621
comp109696_c0_seq1	0.59257	1.87707	1.58215	-0.17802	0.75995	1.034	-3.35945	-2.06762	0.11171	0.75995	-1.42667	NA	NA	-0.32979	2.97637	1.41436
comp109704_c0_seq1	1.76659	NA	-0.6361	0.85361	-1.91015	-0.73093	NA	0.22907	-0.44675	-1.91015	-0.67303	2.35047	-3.53721	0.8815	4.26541	-1.86323
comp109726_c0_seq1	0.4068	NA	4.05603	0.21255	1.01185	-0.27565	-2.75957	0.3523	2.81681	1.01185	-0.04404	NA	-1.58019	1.01566	3.26568	-1.54026
comp1097377_c0_seq1	0.08095	1.87707	NA	-0.59607	1.89108	-1.8519	-0.61171	-0.81199	-0.87956	1.89108	-0.09408	-4.91427	1.50979	1.26688	-1.13069	-2.1106
comp109751_c0_seq1	-0.20538	NA	0.01764	-1.47373	1.89109	2.12154	-1.31815	2.45213	0.64641	1.89109	-1.53977	-6.36991	NA	5.93755	0.31177	-4.21746
comp109756_c0_seq1	0.01718	NA	-0.56401	-0.77435	0.36854	-0.19829	-1.88844	0.56185	-0.4036	0.36854	-0.83632	-0.70463	0.76541	-0.49844	0.06416	-0.95694
comp109776_c0_seq1	-1.18719	NA	-0.89145	0.13173	0.00438	1.2927	-4.75679	0.70663	1.09303	0.00438	0.40515	NA	-1.40232	2.57213	-1.285	-2.02426
comp109777_c0_seq1	-0.36228	1.61051	0.63829	0.09724	0.00437	NA	-2.75954	3.61088	-5.68165	0.00437	1.09433	NA	2.03834	3.7167	4.39049	NA
comp109777_c1_seq1	NA	NA	-2.69324	-3.19648	0.00436	NA	-3.74291	1.76554	-4.18402	0.00436	1.88082	NA	5.41109	NA	NA	NA
comp109801_c0_seq1	0.23249	NA	0.63829	0.09725	0.92078	0.59999	NA	NA	-0.45918	0.92078	NA	NA	NA	NA	NA	-0.33344
comp109804_c0_seq1	0.13752	0.55507	1.17215	-0.75889	3.20134	-2.64766	3.68672	-1.04342	0.0614	3.20134	-1.08978	0.17412	-0.98626	2.51842	-1.25694	2.52166
comp109813_c0_seq1	0.27891	NA	-1.49574	3.41728	-0.95741	-0.04125	NA	1.50621	-0.56018	-0.95741	2.96344	-6.79484	NA	NA	NA	-0.33352
comp109818_c0_seq1	-0.18001	NA	0.53459	-2.43858	-1.06776	-1.33116	1.24652	-0.62877	-0.85804	-1.06776	4.19258	0.12077	-1.40232	-0.22901	1.06448	1.39932
comp109819_c0_seq1	-0.67503	NA	NA	0.25591	NA	-0.31196	-2.79723	-1.04531	-0.05589	NA	1.57356	1.25065	0.41829	-3.61279	0.48184	-2.21245
comp109820_c0_seq1	-0.68288	NA	0.21512	3.5446	NA	-0.68231	NA	2.69757	-0.22394	NA	-0.01121	2.74506	-0.23291	NA	NA	-0.33349
comp109825_c0_seq1	-0.24341	NA	0.65658	0.43215	0.12938	0.71651	-0.61168	0.01044	-0.58258	0.12938	1.62104	0.86236	1.09837	-0.91538	-0.53963	2.63334
comp109828_c0_seq1	NA	NA	-0.12799	-2.19205	0.96614	NA	NA	1.32417	-3.08194	0.96614	NA	3.46477	-4.7289	NA	1.44363	NA
comp109836_c0_seq1	-0.04345	NA	1.58215	-0.08493	0.96615	0.7871	-0.61165	NA	1.06036	0.96615	-1.86387	-3.91972	-0.2106	NA	-0.34203	-0.33359
comp109842_c0_seq1	-0.93151	1.11139	-1.24404	1.23692	0.72468	0.13893	-4.07187	-0.23444	0.05955	0.72468	0.62083	0.37847	1.20407	0.57038	4.67516	1.43145
comp1098473_c0_seq1	0.59444	NA	2.5995	0.18941	-0.0458	-3.58509	1.42528	0.62931	0.06751	-0.0458	2.44993	-1.2867	-3.53721	5.18341	-0.23692	0.98776
comp109856_c0_seq1	0.00898	NA	0.48319	-0.08016	-0.95741	-0.63791	-5.34582	0.19141	0.5212	-0.95741	-0.34517	3.93167	0.53573	0.73507	-0.16758	1.46177
comp109860_c0_seq1	-0.66928	0.50873	0.07391	3.54445	0.19625	-2.64308	-5.70191	-1.0404	-1.74865	0.19625	-0.98813	-0.18662	4.10394	NA	3.13625	1.46408
comp1098657_c0_seq1	0.18934	NA	0.77917	-0.92363	-1.80776	-2.7554	-0.61176	-0.33281	-3.37265	-1.80776	2.75499	-0.37162	NA	-1.57418	-2.81729	3.20737
comp109884_c0_seq1	0.50039	NA	0.5168	1.13166	-0.1341	1.48306	NA	NA	NA	-0.1341	NA	NA	NA	-0.81275	-2.55755	2.26809
comp109888_c0_seq1	-0.00412	1.26422	1.55966	0.11063	-0.15804	0.73114	-3.35948	-0.02191	0.30033	-0.15804	1.25577	0.69169	2.3913	-0.72753	0.16537	-1.98849
comp109896_c0_seq1	0.3103	NA	2.27254	0.33888	-0.9574	0.28537	0.68295	-0.42411	-0.04934	-0.9574	-0.3437	-2.92598	0.88763	1.41603	-1.49941	3.88101
comp109900_c0_seq1	NA	1.27289	NA	0.48995	0.96615	-0.00255	NA	-2.68956	0.80779	0.96615	0.95051	-4.31478	1.02846	NA	NA	-3.26627
comp109904_c0_seq1	-0.72596	NA	0.60872	0.19291	-0.24121	0.27711	-4.08809	0.34821	0.44545	-0.24121	0.67721	-1.02343	0.26508	-1.24562	-1.0473	0.379
comp109914_c0_seq1	0.30746	0.70049	0.13399	0.90399	-0.61682	-2.15072	3.44972	-1.81052	-0.84829	-0.61682	0.44578	-2.41666	4.02805	-3.61279	1.97554	3.1829
comp109927_c0_seq1	0.5995	NA	NA	NA	NA	-0.0413	2.83084	NA	NA	NA	-0.97296	NA	5.2488	NA	-0.6723	-2.09324
comp109932_c0_seq1	0.19716	1.85499	NA	1.90924	-1.91327	0.01355	0.87009	0.33987	-3.04533	-1.91327	0.18478	NA	-0.01156	0.05842	0.15771	-1.25984
comp109949_c0_seq1	0.02548	NA	-1.09985	-4.57756	NA	1.41262	4.41577	-0.33525	-0.60932	NA	-2.10323	1.25065	0.62069	2.93961	-0.29497	1.60127
comp1099686_c0_seq1	0.62092	NA	1.31897	-1.06523	0.00435	-2.05355	-5.21059	3.56474	1.89073	0.00435	-2.14266	NA	-2.89252	6.00059	5.62784	-0.48039
comp109975_c0_seq1	-0.38661	NA	2.19743	0.0902	0.00438	3.46638	-2.87841	-1.3129	-0.55185	0.00438	0.40983	NA	-2.4548	-0.37044	NA	-3.73606
comp1099757_c0_seq1	NA	NA	NA	NA	NA	NA	NA	NA	0.80779	NA	NA	NA	NA	NA	NA	NA
comp109982_c0_seq1	0.16408	NA	-1.12384	0.36464	1.85874	-0.04125	-0.61165	-0.90598	1.6626	1.85874	-1.90071	-4.26943	0.75915	0.38256	1.14691	NA
comp109993_c0_seq1	NA	0.31915	-0.68028	4.93779	0.96614	NA	NA	NA	NA	0.96614	NA	1.71557	1.73613	NA	NA	NA
comp110002_c0_seq1	0.16845	0.11352	0.88725	-1.20121	-0.17327	-0.49681	1.20316	-0.02869	-0.3769	-0.17327	0.29898	NA	0.06846	0.11187	-0.25378	-0.26019
comp110009_c0_seq1	-1.00482	0.56593	NA	0.66786	0.63891	3.74317	-3.35946	0.66368	-1.06823	0.63891	-0.64317	NA	0.34849	NA	2.956	2.59528
comp110023_c0_seq1	-0.14189	NA	0.8423	2.91424	-0.017	0.17262	-1.63531	-0.1945	-0.06888	-0.017	1.0832	-2.08314	1.38333	0.38993	0.29617	-1.19248
comp110032_c0_seq1	-0.04169	NA	-0.01721	NA	0.96614	-0.04122	NA	0.18815	NA	0.96614	-1.43806	NA	2.03834	NA	2.13471	NA
comp1100340_c0_seq1	-0.21705	1.87707	0.96396	2.4206	0.9159	-0.15289	-0.61167	-0.34618	0.1442	0.9159	-1.23967	NA	-2.54623	-2.16604	NA	-5.42629
comp11004_c0_seq1	NA	NA	NA	NA	NA	NA	NA	NA	NA	NA	NA	NA	NA	NA	NA	NA
comp110048_c0_seq1	0.38009	0.84482	0.20731	5.72865	-0.68724	-0.47902	2.83095	0.74181	-0.1507	-0.68724	-0.80796	NA	-0.8087	-0.49448	2.065	-1.18291
comp110063_c0_seq1	-1.37338	NA	-1.46759	-3.18117	0.96615	-0.20413	-5.05459	0.46769	-0.3596	0.96615	-0.48413	NA	-0.15571	2.23277	5.19145	1.00796
comp110074_c0_seq1	0.27416	NA	2.03809	-3.35297	1.79787	2.6777	-4.32173	1.14411	0.26658	1.79787	-1.42915	-4.61661	-0.23291	0.05713	-0.90959	-0.33358
comp110078_c0_seq1	-0.05774	NA	-0.7221	-0.36116	-0.00204	1.40481	-1.4886	0.44271	0.38057	-0.00204	-1.18651	0.27014	-0.10337	-0.36407	0.59353	-1.60362
comp110080_c0_seq1	0.46478	NA	-1.48906	-0.88624	-0.60416	-0.64778	-0.61177	-1.18637	0.03164	-0.60416	-1.22522	1.28907	-1.69559	1.03664	0.79056	1.88329
comp110092_c0_seq1	0.0905	NA	3.03516	-1.17616	-0.85606	1.28118	2.91167	-0.87085	3.71718	-0.85606	-2.61399	-1.83891	-2.28218	0.03641	1.52436	-1.84307
comp1100956_c0_seq1	-0.34087	NA	1.61315	0.22366	-0.9574	-0.61797	-2.59737	NA	NA	-0.9574	0.43117	-3.79946	NA	0.74342	-0.58426	7.05808
comp110101_c0_seq1	-0.53389	0.39241	0.63829	NA	0.00436	-0.08796	-0.61168	NA	0.74746	0.00436	NA	NA	-0.24317	NA	-0.6723	-3.04916
comp110103_c0_seq1	0.05959	NA	NA	-3.35358	-0.9574	-0.47782	-0.61171	-2.04732	0.19987	-0.9574	2.31613	NA	NA	0.16511	NA	-3.83067
comp110105_c0_seq1	0.33018	NA	-0.26476	0.29655	1.2509	0.08744	-2.76887	-0.48371	-1.88783	1.2509	0.03756	NA	0.20303	-5.99561	-1.64275	0.45718
comp110108_c0_seq1	0.05926	NA	1.2623	0.09554	0.00435	2.70434	-0.61173	-0.93615	1.06611	0.00435	-0.67415	NA	-4.1189	-2.22804	1.44363	-4.04149
comp110109_c0_seq1	0.21743	NA	1.21782	0.60383	0.61666	-0.18512	1.61534	0.16298	-1.49999	0.61666	0.69743	NA	1.33878	-1.83833	-1.44815	0.86421
comp1101205_c0_seq1	-0.18575	NA	-0.25828	-1.43085	0.44153	-1.31136	-2.75957	-0.46748	0.58073	0.44153	-0.55264	2.31739	-2.54623	0.67883	-2.26095	2.07757
comp110128_c0_seq1	0.91745	NA	-0.24503	-0.89769	-0.34725	0.69712	0.65346	-0.72199	-1.18282	-0.34725	0.61622	-0.16277	0.83765	0.04392	-3.86591	-1.04765
comp110135_c0_seq1	-0.07166	NA	NA	-2.19208	0.91871	-8.5946	5.63826	-0.47714	-2.56179	0.91871	-0.97299	NA	2.03834	1.72252	-2.73138	8.20114
comp1101484_c0_seq1	-0.77398	NA	-0.32107	-1.21146	0.44667	1.82318	-0.61171	0.5322	-0.29303	0.44667	-0.68328	-0.49461	NA	-0.12115	1.65855	3.13581
comp110163_c0_seq1	-0.09554	NA	3.22487	-0.35307	0.74463	-0.88439	-7.03142	-0.36286	1.78058	0.74463	-2.31811	-5.04913	2.7964	3.85145	0.23177	0.91774
comp110182_c0_seq1	-0.83536	1.61051	0.63829	-0.85612	-0.60365	1.42732	-4.92476	-0.05981	0.01957	-0.60365	1.87624	0.38898	-0.4121	-3.02802	0.83354	-3.58673
comp110183_c0_seq1	0.13302	1.13299	NA	-5.1828	-0.9574	3.93121	-1.78145	1.39284	1.36641	-0.9574	0.62776	-5.03947	0.02775	2.1147	-0.9298	-4.56866
comp110192_c0_seq1	0.30169	NA	NA	0.57971	0.00436	-0.25347	-3.35941	1.16253	-1.93646	0.00436	-0.77954	NA	NA	-0.79075	-5.30288	-5.781
comp110197_c0_seq1	-0.02289	NA	-1.22439	0.1568	0.941	-1.3034	-2.71775	1.02884	-1.37189	0.941	2.61053	-2.47123	0.2853	3.266	-1.14172	-2.25669
comp110208_c0_seq1	0.07981	NA	-0.12922	-0.33998	-0.63373	0.44483	-3.743	-0.29299	-3.57396	-0.63373	0.07329	-0.35695	-0.27866	-4.0573	-0.6723	1.65381
comp110222_c0_seq1	-0.39773	NA	-0.46081	0.14669	1.27263	0.24491	-0.47163	0.06463	-1.2952	1.27263	0.90491	0.25936	2.60749	-0.80993	0.595	-0.14394
comp1102316_c0_seq1	0.85867	NA	NA	2.66094	0.00436	-1.93164	3.83082	-0.13868	-0.38087	0.00436	2.64196	-3.79946	-2.89252	-5.17387	-2.078	2.58991
comp110234_c0_seq1	0.19621	NA	0.42407	-1.43453	-2.80336	-0.32505	-4.35459	-0.37704	-2.04296	-2.80336	-0.02867	NA	0.52276	2.11048	-1.75554	2.98624
comp110235_c0_seq1	NA	1.61051	NA	2.22477	-0.95741	-0.68235	NA	-2.48402	-0.15399	-0.95741	0.70149	2.59851	-0.27866	NA	NA	-4.15311
comp1102393_c0_seq1	0.13858	NA	0.13803	-0.02225	2.86757	0.27544	-4.75062	-0.47939	-1.49183	2.86757	-0.69364	-3.23716	2.03834	1.31068	1.26781	1.62159
comp110280_c0_seq1	0.23953	1.61051	-2.17669	0.71514	0.96615	-1.18189	NA	1.5644	1.13429	0.96615	-0.97298	NA	2.299	0.96558	0.48184	1.85593
comp1102869_c0_seq1	-0.41896	0.32351	NA	NA	-0.53873	-0.39008	0.68247	0.39815	0.80779	-0.53873	0.50465	-0.15424	-0.27795	0.86754	-4.62467	0.39806
comp1102917_c0_seq1	-1.00942	NA	-0.41872	0.54508	0.33081	0.15041	-0.6117	-0.23924	-0.26241	0.33081	0.14808	NA	0.88763	-1.93961	3.99562	-1.1924
comp11030_c0_seq1	-0.68288	1.61051	-1.85713	NA	1.48554	NA	NA	NA	NA	1.48554	NA	NA	NA	NA	NA	NA
comp1103154_c0_seq1	-0.71143	NA	-0.25657	NA	NA	2.15223	NA	NA	0.80779	NA	-2.98388	NA	NA	-4.92911	NA	-5.38472
comp1103156_c0_seq1	-0.82297	NA	NA	NA	NA	-0.65428	-0.30038	NA	NA	NA	NA	NA	NA	NA	NA	-0.33344
comp110327_c0_seq1	0.25053	1.2738	-0.61577	-2.19209	2.20995	1.97455	-4.08636	0.13318	-2.00943	2.20995	0.71276	NA	NA	-1.33173	NA	2.75929
comp110336_c0_seq1	0.005	NA	-2.75746	-1.48545	1.87336	5.57239	-5.47243	1.18205	-1.24276	1.87336	-1.33319	-1.61301	-0.2315	1.32791	1.82857	1.71843
comp1103374_c0_seq1	-0.15683	NA	NA	2.42057	0.91871	-1.16729	0.68303	0.22656	-0.70684	0.91871	NA	-1.19216	NA	3.30155	-0.33091	2.37813
comp1103555_c0_seq1	-0.31679	NA	-0.06038	0.25229	0.47743	0.36388	-0.61176	-0.36058	-0.87077	0.47743	-0.43419	3.62585	0.96605	-0.36471	1.37441	-0.40913
comp110359_c0_seq1	-0.04169	NA	NA	NA	-1.87636	3.95938	NA	0.41917	NA	-1.87636	-2.90749	NA	-3.90002	NA	4.8322	-0.33351
comp110372_c0_seq1	0.49647	NA	1.13509	-0.05492	-2.81543	-2.39301	-2.75961	0.1148	-1.62768	-2.81543	0.48292	-0.06978	0.62774	2.01337	-1.83224	3.80953
comp110392_c0_seq1	NA	NA	NA	NA	0.00436	NA	NA	NA	NA	0.00436	NA	NA	NA	NA	NA	NA
comp110394_c0_seq1	0.3033	0.41782	-0.63836	0.69977	0.56135	-0.44199	NA	-0.22528	0.55074	0.56135	0.50014	NA	0.32094	0.42178	-5.55271	3.60472
comp110402_c0_seq1	0.25796	NA	0.94091	0.21079	-0.85476	-4.26167	-1.13195	-0.15046	0.54658	-0.85476	1.1608	-1.36626	-3.21648	2.12379	-1.76205	-1.07176
comp1104055_c0_seq1	-0.45974	NA	-3.13479	-1.83946	0.27606	-0.7091	NA	0.39855	-0.31005	0.27606	-1.89816	-3.79946	1.02846	-1.09923	-2.2404	-3.23848
comp110408_c0_seq1	-0.36228	NA	NA	NA	NA	NA	NA	NA	NA	NA	NA	2.24898	NA	NA	NA	NA
comp110415_c0_seq1	-0.32665	NA	0.63829	-3.49775	NA	3.59342	-0.61167	1.70863	-1.03773	NA	1.39382	-4.75864	-0.23291	1.5788	-4.11392	-0.33359
comp110416_c0_seq1	-0.35795	NA	-0.46694	0.52329	-0.22109	-1.82567	-2.762	0.38889	-0.1647	-0.22109	0.90525	1.38133	1.02846	-1.11584	0.95624	1.97786
comp110438_c0_seq1	-2.06761	0.26098	NA	-1.97439	0.96614	3.26695	-0.61167	NA	0.28087	0.96614	-0.32162	NA	-2.35891	NA	-0.6723	-5.75011
comp110441_c0_seq1	0.63379	NA	1.27268	-0.19857	-2.18293	1.19732	-0.12377	0.10173	-1.25917	-2.18293	0.24105	NA	0.81773	-2.1981	1.1662	-1.35792
comp110445_c0_seq1	-0.55532	0.3466	-0.02047	-0.33454	1.02213	-0.89229	-3.76887	0.47229	0.05873	1.02213	-0.14837	-4.26943	-0.57919	-0.46616	0.59789	-2.019
comp110455_c0_seq1	-0.04169	0.11352	0.56896	-0.68849	NA	NA	NA	-0.54415	-1.65519	NA	NA	NA	0.41212	NA	NA	NA
comp110458_c0_seq1	-1.59305	NA	-0.2938	NA	0.62124	-1.13684	NA	-0.14307	-1.95943	0.62124	NA	NA	-0.13616	NA	NA	-5.02335
comp11046_c0_seq1	NA	0.84482	NA	0.09725	NA	NA	-0.61167	0.79872	NA	NA	NA	0.25374	NA	NA	NA	NA
comp110461_c0_seq1	0.19912	NA	-0.47758	-3.45424	-2.00342	-0.00948	2.70989	0.17308	-0.87192	-2.00342	-0.18582	-2.45172	3.03169	2.23113	-0.48978	0.6077
comp110467_c0_seq1	0.14814	0.2877	-1.78568	-0.0669	0.26532	0.38861	-0.89977	-0.30757	-0.65474	0.26532	0.1325	NA	3.71276	-0.52073	-0.49377	-0.48996
comp110476_c0_seq1	-0.29901	NA	NA	1.34736	NA	-1.93108	-3.35938	0.91983	-0.52008	NA	-1.88725	NA	2.73866	NA	NA	5.17656
comp1104824_c0_seq1	-0.48022	1.87707	0.65002	0.54635	-0.9574	3.17551	-3.3572	-0.10266	1.36835	-0.9574	-0.42364	NA	-1.58019	-1.82082	-1.92909	-1.97464
comp110486_c0_seq1	0.5995	0.45068	NA	0.17107	0.48158	-0.04118	NA	NA	-0.54986	0.48158	0.25325	NA	-2.89252	1.5788	-1.285	-1.50244
comp110496_c0_seq1	-0.24303	0.85938	NA	-0.49106	0.96615	-0.32199	-4.32181	NA	-0.81764	0.96615	0.65833	NA	0.4343	-0.96598	-4.80521	1.08459
comp1104980_c0_seq1	-0.25415	NA	NA	0.09725	1.0135	-0.61047	NA	-0.94898	0.63816	1.0135	-1.88731	NA	NA	NA	-5.0556	-4.18205
comp1105004_c0_seq1	0.07152	NA	NA	1.07144	-2.84343	0.71585	-3.35948	-0.01105	0.15804	-2.84343	-0.43973	NA	-2.54623	-1.34162	NA	-7.47653
comp110504_c0_seq1	-1.04128	NA	-2.59921	1.97951	0.96615	-2.44738	-1.67663	0.48563	0.34457	0.96615	1.72964	-2.89249	-2.74314	-2.93195	1.44507	-3.60047
comp1105051_c0_seq1	NA	0.56593	-1.22473	NA	NA	-0.0413	NA	2.01194	NA	NA	-0.01124	NA	2.03834	NA	NA	NA
comp110510_c0_seq1	-0.25973	1.10053	1.7629	1.91938	0.57544	1.42598	0.68303	-0.20813	0.28926	0.57544	1.14381	-3.91972	2.03834	-0.16036	-0.6723	-0.45315
comp110516_c0_seq1	0.16278	0.69509	NA	-4.88424	0.09221	0.27798	-2.75959	NA	0.36309	0.09221	-0.55999	NA	2.03834	-2.16604	NA	2.68742
comp110520_c0_seq1	-0.33758	NA	0.06097	-1.43102	-0.88399	0.33023	-0.88356	0.16817	-0.18484	-0.88399	-1.15401	-0.09324	-1.21541	-1.91877	0.17125	-0.43574
comp110531_c0_seq1	0.0213	NA	-1.22473	-1.66513	-1.54901	0.85169	NA	0.27331	1.84119	-1.54901	0.38968	NA	1.74478	5.16028	1.34801	-4.53524
comp110532_c0_seq1	-0.30481	NA	2.33863	-0.36171	3.06896	0.12383	-0.61168	1.26177	-2.43778	3.06896	1.28006	NA	NA	-1.93961	3.24431	-1.96086
comp110536_c0_seq1	-0.36228	NA	-0.17666	4.60011	-0.38081	-0.44611	-4.37161	-0.73568	0.61536	-0.38081	2.20276	0.34048	1.87545	NA	0.84229	-2.57557
comp11054_c0_seq1	0.0821	0.83396	NA	0.4997	-0.47583	1.28591	-0.66761	1.463	-2.18152	-0.47583	0.21752	NA	-1.03051	0.37063	-1.83196	-5.81776
comp110540_c0_seq1	0.48245	NA	2.02441	-4.57614	-1.4389	-1.38191	-0.61165	2.29991	-1.27869	-1.4389	-1.95213	NA	NA	-0.10195	-4.90025	3.61434
comp1105462_c0_seq1	-0.22394	NA	-0.76702	-1.6537	0.59671	-0.29901	2.83091	0.03535	-0.39009	0.59671	0.74716	0.05235	0.02775	-1.06219	-1.00999	0.35016
comp11057_c0_seq1	0.5995	NA	NA	-2.19205	NA	NA	NA	NA	-0.70684	NA	2.88894	NA	NA	NA	NA	NA
comp110582_c0_seq1	-0.09206	NA	-2.71263	1.30883	-0.24093	1.43442	-3.30137	0.84065	-1.71315	-0.24093	0.89507	0.86214	1.30286	-0.61574	1.76408	-1.05748
comp1105832_c0_seq1	-0.76165	NA	NA	2.16628	1.90696	-2.23638	0.68296	-0.89624	0.85133	1.90696	2.55056	NA	-0.57919	NA	4.22664	-2.2215
comp110586_c1_seq1	0.19303	NA	1.86953	-0.76965	-0.95741	2.60209	-0.61165	0.39955	-1.86179	-0.95741	-0.09986	-3.79946	-2.54623	0.81167	-1.43384	-3.17798
comp110596_c0_seq1	1.54151	NA	0.51008	NA	NA	1.34459	-2.75961	0.11337	-1.43284	NA	-0.97296	-0.60911	NA	NA	3.71276	2.47881
comp110598_c0_seq1	-0.03194	NA	1.32806	0.30101	-0.58595	-0.00829	2.83082	1.42388	-0.76725	-0.58595	-0.72708	NA	1.64558	-0.14664	-1.46275	5.58834
comp1106004_c0_seq1	-1.35455	NA	-1.22473	-1.42584	NA	2.61593	-0.75783	0.68669	0.19685	NA	-1.78119	0.37847	-4.7289	NA	NA	-4.19728
comp1106028_c0_seq1	0.0574	NA	1.17266	NA	NA	0	-0.74423	NA	NA	NA	0.90375	NA	NA	NA	2.9998	NA
comp110607_c0_seq1	0.04151	NA	0.88774	2.065	0.6122	2.11543	0.65808	0.06805	0.42301	0.6122	-0.02404	NA	-0.23291	-0.76364	1.05479	-2.15047
comp110610_c0_seq1	-0.38044	NA	-0.4104	-2.70177	1.46232	0.64978	-5.7334	-0.09905	-5.33534	1.46232	-0.05028	-4.02703	-1.49329	1.72252	-0.6723	2.10138
comp110611_c0_seq1	-0.38624	NA	1.69775	-2.81938	-1.59556	-0.34624	1.01814	-0.37383	-0.55208	-1.59556	-0.5837	NA	-0.00998	-0.08659	-1.86248	1.45525
comp110621_c0_seq1	-1.41346	0.81422	-1.22473	2.22306	-0.99558	1.5147	-4.33978	-0.19543	0.80193	-0.99558	0.89549	NA	3.17408	-1.37248	-0.6723	-2.94383
comp110632_c0_seq1	-0.36228	NA	4.04023	1.5381	0.34998	3.74679	-4.36414	-1.27753	3.96221	0.34998	-1.15717	-2.84335	-2.07549	3.6455	1.44363	1.42093
comp1106426_c0_seq1	0.5752	NA	1.08145	0.09726	1.84997	1.83159	-0.61168	-0.43182	0.61281	1.84997	-0.01122	0.95272	0.56982	-0.26016	-1.46197	3.69912
comp110649_c0_seq1	0.43721	0.26702	NA	-5.18096	2.51106	0.0827	-2.29795	1.35672	-0.10433	2.51106	-1.0719	-4.26943	2.00941	0.09659	-1.04876	1.61399
comp1106706_c0_seq1	0.27891	0.56593	-0.30773	NA	0.01863	-0.68226	-0.73147	NA	NA	0.01863	0.9505	1.31733	0.08606	NA	3.97564	-0.33344
comp1106739_c0_seq1	-0.29467	NA	1.88647	-1.64987	0.00438	0.27624	2.83094	0.16519	-0.20521	0.00438	-0.66942	-2.80844	1.50979	-2.07611	-3.27814	2.47884
comp110706_c0_seq1	1.20436	NA	-1.31614	2.42056	-0.99635	1.72864	-4.37162	NA	-0.18047	-0.99635	2.34916	NA	NA	2.57213	NA	-3.0909
comp110711_c0_seq1	-0.29455	0.83396	-1.16021	-0.2896	0.24472	2.83657	-0.61168	-0.66438	0.67899	0.24472	-1.84736	0.25374	-1.61402	2.83906	0.81759	-4.25963
comp110719_c0_seq1	0.27891	NA	-1.21146	NA	0.22165	NA	NA	0.84466	-2.23105	0.22165	0.75433	NA	4.02805	NA	NA	NA
comp110725_c0_seq1	-1.30583	NA	NA	1.37699	0.00437	-0.59486	-0.61166	0.04097	0.80779	0.00437	3.95782	NA	1.84167	-1.93961	1.44363	-0.33365
comp110732_c0_seq1	NA	NA	-3.24882	NA	3.43848	NA	NA	NA	NA	3.43848	2.98913	NA	2.02303	NA	NA	NA
comp110740_c0_seq1	-0.0852	NA	-0.01688	0.87639	-0.37281	1.09305	-1.05692	-0.17532	-0.93623	-0.37281	0.24755	0.01317	1.61064	-0.37593	-1.13474	-3.01227
comp110746_c0_seq1	0.23326	NA	NA	NA	NA	NA	NA	NA	NA	NA	NA	2.28357	2.299	NA	NA	NA
comp110752_c0_seq1	0.14484	NA	-1.79311	NA	1.346	-0.43729	-0.34188	0.35647	0.22945	1.346	0.15862	NA	1.41333	0.32611	0.65956	1.8195
comp1107655_c0_seq1	-0.04169	NA	-1.76604	NA	NA	NA	NA	NA	NA	NA	NA	NA	NA	NA	NA	NA
comp110773_c0_seq1	0.30192	NA	NA	2.42986	-0.01053	0.5437	-6.63068	NA	-1.38884	-0.01053	2.54667	2.08528	-1.04086	NA	1.00353	-0.33354
comp110780_c0_seq1	0.15934	NA	NA	NA	NA	0.53862	-2.76488	0.76222	0.53481	NA	-0.50319	NA	NA	-0.00698	-2.09088	-5.13897
comp110787_c0_seq1	-1.97446	NA	-0.32234	0.73233	0.25985	0.61022	-2.75962	0.1347	-0.78369	0.25985	0.53406	0.21986	1.03516	1.42722	1.59788	-0.46251
comp110788_c0_seq1	0.48392	NA	0.63829	-2.19209	0.00438	1.88697	5.83095	NA	-1.74191	0.00438	1.84316	-1.41498	-3.53721	1.41188	1.09797	2.59125
comp110797_c0_seq1	-0.04939	NA	NA	NA	NA	-0.66061	0.09812	NA	0.80779	NA	-0.85784	NA	-2.54623	NA	-2.6338	-0.64383
comp110798_c0_seq1	NA	0.3682	-1.22473	NA	0.29502	NA	-3.35938	NA	NA	0.29502	NA	NA	6.11396	NA	NA	NA
comp110806_c0_seq1	-0.26875	0.85938	-0.32985	-1.73752	-0.12066	1.33629	NA	0.26274	0.27654	-0.12066	-0.73467	0.22549	-0.48985	0.67773	NA	-0.00775
comp1108064_c0_seq1	NA	NA	NA	-3.76751	NA	NA	NA	-0.03802	-1.24514	NA	2.20219	NA	3.61426	NA	NA	NA
comp110819_c0_seq1	0.94696	0.55507	0.32082	-0.22999	-0.82818	-0.36152	-4.7379	-0.69172	-1.98732	-0.82818	0.69684	0.37847	-1.02267	0.87101	NA	-0.44604
comp110828_c0_seq1	-0.20926	1.61051	0.5081	1.74842	2.84841	0.3324	-4.08808	-0.26682	0.2045	2.84841	0.53949	-0.0217	3.71276	0.29805	-1.74994	-0.84211
comp110831_c0_seq1	0.17937	NA	0.63829	-1.57558	-0.5844	0.14692	-5.08864	0.54889	3.37867	-0.5844	0.82584	-8.9521	-1.24645	3.31169	-0.83883	-1.46671
comp110844_c0_seq1	0.0404	NA	-0.69518	-2.28985	0.97393	-1.86152	-5.777	-0.1362	-1.11853	0.97393	0.09292	-2.02253	4.52332	1.5788	-4.53666	-3.7986
comp1108558_c0_seq1	-0.99871	NA	NA	2.4206	NA	2.64443	-0.61167	1.96585	0.2816	NA	0.99828	NA	2.03834	3.31169	NA	1.77801
comp110877_c0_seq1	0.67064	1.61051	-0.13317	-1.38873	-1.21662	3.30914	NA	NA	NA	-1.21662	NA	-3.79946	-0.31853	1.41189	1.44363	1.46928
comp1108820_c0_seq1	0.20617	0.13694	0.8402	3.65706	-0.9574	0.0469	-3.74298	0.59444	-0.4413	-0.9574	-0.09933	NA	2.299	0.71343	0.10635	-1.35467
comp1108857_c0_seq1	-0.04344	NA	-2.17193	2.42055	0.00438	1.8066	-0.61167	-1.21608	-0.5896	0.00438	-3.41548	-3.91972	-2.54623	-0.56321	NA	-0.33369
comp110887_c0_seq1	0.51844	0.56593	NA	-0.55147	1.04383	-0.74039	-0.63695	-1.41601	1.61505	1.04383	0.49399	NA	-1.95943	0.86796	-3.98252	0.29052
comp110888_c0_seq1	-0.59359	NA	0.79894	-1.41545	0.88999	0.43513	-5.92519	-1.21296	0.1049	0.88999	0.17797	-0.72631	-0.81332	1.49894	-2.9589	3.51488
comp110902_c0_seq1	-0.20132	NA	-0.47638	-1.03314	1.91428	-1.23852	2.83083	-0.73161	2.67849	1.91428	-2.04811	0.37847	2.16585	1.61755	2.37241	1.15535
comp110905_c0_seq1	NA	NA	NA	NA	-0.9574	NA	NA	NA	NA	-0.9574	NA	2.96832	NA	NA	NA	NA
comp110915_c0_seq1	0.10227	NA	-1.22473	1.20714	NA	2.38055	-0.61171	NA	-0.6317	NA	0.21741	NA	2.299	-1.6022	1.7867	-1.01121
comp110923_c0_seq1	-0.00575	NA	-0.21554	-0.64194	-0.62266	-1.09151	3.3504	0.8975	-0.58191	-0.62266	-0.963	-4.91427	-1.71711	-0.74468	-2.8208	0.35075
comp110931_c0_seq1	-0.04169	0.55507	NA	-2.66545	0.00436	-0.52206	-0.61165	-0.38283	-0.59241	0.00436	0.54825	NA	0.75421	-1.93961	NA	-4.10192
comp110942_c0_seq1	0.0536	NA	0.89552	0.30014	-1.57148	0.95345	-2.78556	-0.00905	0.2656	-1.57148	0.20453	0.25374	-1.44086	1.54356	0.90957	0.22903
comp110945_c0_seq1	-0.16811	NA	0.56926	-1.32581	0.58971	1.9137	-0.44515	-0.16667	1.52419	0.58971	-1.59409	NA	-3.95254	2.07277	0.46705	-3.72161
comp1109537_c0_seq1	-0.12901	0.55507	0.4106	1.16596	-2.44172	-0.40062	-3.7727	-1.15936	0.69449	-2.44172	-0.45658	NA	0.58238	-1.02153	1.55089	-0.20122
comp110958_c0_seq1	0.16609	NA	-0.13732	-0.61899	1.19663	0.60984	-0.61169	0.63881	0.81609	1.19663	1.10189	NA	3.03169	-3.93002	2.02156	-3.561
comp110960_c0_seq1	-1.46941	1.07411	1.58215	0.09725	0.30531	0.73174	-0.61169	-1.12627	0.83152	0.30531	-0.05248	NA	NA	NA	-1.55616	-2.21372
comp1109650_c0_seq1	NA	NA	NA	NA	NA	NA	NA	NA	NA	NA	NA	NA	NA	NA	NA	NA
comp1109653_c0_seq1	0.93379	NA	0.99302	1.51869	0.00435	2.05071	-4.92196	0.66094	1.37698	0.00435	1.16731	0.37847	0.34849	4.04409	3.70859	1.76078
comp11099_c0_seq1	0.25602	NA	2.19286	-3.9849	0.02111	0.48278	1.65654	-0.42973	2.72006	0.02111	-3.98583	-2.4589	-2.17539	0.70629	1.79135	0.86964
comp110990_c0_seq1	0.41623	0.56593	0.61443	-2.18657	-0.81379	0.447	-3.01794	0.16769	2.08996	-0.81379	-2.06282	-1.79665	-0.23811	2.45031	-0.76658	1.96554
comp111017_c0_seq1	-0.52676	NA	-0.3483	-3.55812	-0.15262	-1.2113	-1.40466	NA	-1.26891	-0.15262	0.01351	2.90236	NA	0.30198	-2.45572	0.85454
comp111028_c0_seq1	0.06039	NA	-0.85749	-0.78474	-0.01858	0.41646	-0.61175	-0.02121	-0.74495	-0.01858	-1.16585	1.92429	-3.7288	2.57213	1.26881	-0.87138
comp111034_c0_seq1	0.45396	0.55507	NA	2.65111	NA	-0.03211	-2.75957	NA	-1.99657	NA	0.95053	NA	NA	NA	-3.09635	3.25791
comp111038_c0_seq1	-0.20353	NA	-0.55887	-1.7276	-0.2884	0.363	4.83095	1.25662	-0.64845	-0.2884	-1.69281	-2.91095	1.7497	0.28516	1.99117	-1.42945
comp111052_c1_seq1	0.4514	1.63592	1.12998	1.34585	1.20738	-1.02073	-0.90381	-0.64552	-0.42924	1.20738	-0.52065	NA	-2.54623	0.66839	2.61159	1.69717
comp1110647_c0_seq1	-0.11888	0.2568	NA	NA	NA	0.89237	NA	NA	0.05447	NA	1.53894	NA	3.61426	-1.93961	NA	-0.77053
comp111076_c0_seq1	-0.91751	NA	NA	2.66094	1.85502	-0.04115	-0.61165	0.4485	-0.15399	1.85502	NA	NA	-1.04865	NA	NA	-0.33348
comp111098_c0_seq1	-0.62272	NA	NA	0.35681	0.8613	0.44932	NA	0.49764	0.64724	0.8613	0.41671	-3.91972	-2.89252	NA	-2.75637	3.98067
comp111100_c0_seq1	NA	0.56593	NA	NA	NA	NA	-2.75954	0.12946	NA	NA	-0.01124	NA	2.00941	NA	NA	NA
comp111104_c0_seq1	NA	0.56593	-0.36542	NA	0.88469	NA	NA	NA	NA	0.88469	NA	NA	NA	NA	NA	NA
comp111106_c0_seq1	0.3285	NA	0.60984	-4.35411	0.00436	0.32131	-0.61176	0.33982	0.07808	0.00436	1.2763	NA	2.03834	0.3609	-0.13086	0.06339
comp111107_c0_seq1	-0.15988	NA	0.0483	-2.72599	0.10009	-1.25251	NA	NA	0.24428	0.10009	NA	NA	-0.45514	1.72252	NA	-0.33346
comp111110_c0_seq1	0.45215	NA	-0.212	1.81347	0.6044	1.24621	0.26337	0.79043	-0.92749	0.6044	-0.16958	0.97695	1.33878	-0.79104	-1.02242	-2.41777
comp1111143_c0_seq1	-0.20829	NA	-1.22473	0.09722	NA	-2.34639	2.90299	-0.8451	-3.71479	NA	1.66588	-3.91972	3.80408	1.48557	-2.62974	6.11075
comp111129_c0_seq1	1.82816	NA	-0.46418	NA	0.00436	-1.29985	NA	NA	-0.5918	0.00436	1.32215	0.37847	NA	-0.25679	3.77139	1.29108
comp1111301_c0_seq1	-0.36228	0.56593	2.01559	-0.44075	2.20878	NA	NA	1.01161	-1.4078	2.20878	-0.80143	NA	-0.31853	-0.84764	-2.2404	NA
comp111137_c0_seq1	-0.47209	NA	0.88079	-3.93201	0.00436	0.99901	2.83095	0.30927	-0.20677	0.00436	-0.2374	NA	3.71276	-1.64307	0.84774	-0.96535
comp111140_c0_seq1	-0.71544	NA	-0.89326	0.09725	0.00436	2.17971	-0.61175	-0.04207	-0.3566	0.00436	0.28364	NA	2.03834	NA	3.96863	-2.16964
comp1111627_c0_seq1	-1.34814	0.1053	-2.2059	3.42061	0.00438	-0.15068	-2.75961	-0.76233	0.70744	0.00438	0.90494	-3.79946	4.3078	1.5788	-1.48764	-0.3337
comp1111628_c0_seq1	NA	NA	0.63955	0.09724	0.98952	NA	NA	-2.26188	-0.70684	0.98952	1.76776	NA	-4.7289	NA	NA	NA
comp1111764_c0_seq1	-0.05332	NA	-0.35851	-1.57819	-1.18309	0.9706	-0.61172	0.31818	-1.84104	-1.18309	-0.93616	0.90259	-0.2106	0.81942	-0.54952	-0.04349
comp111184_c0_seq1	-0.193	NA	-0.7801	-2.91369	0.74108	-1.50557	3.17861	-0.75577	-1.44785	0.74108	0.50963	-0.95043	-0.75295	0.52079	-1.92203	2.36747
comp111192_c0_seq1	0.96127	1.61051	-1.22473	1.61273	2.45264	1.33917	NA	NA	-1.11449	2.45264	-0.79387	NA	3.30478	-0.63978	NA	-5.02119
comp111222_c0_seq1	1.15072	1.61051	0.08168	5.70144	-0.40418	2.25635	-0.61168	0.90088	-0.65507	-0.40418	0.98211	0.79514	1.33878	NA	-1.48764	3.48549
comp111226_c0_seq1	-0.35118	NA	-0.36864	1.99223	0.20874	1.14829	-2.12406	0.03453	-0.15778	0.20874	-0.29333	0.00148	3.71276	1.00284	2.0348	-0.15307
comp1112322_c0_seq1	-0.99962	NA	0.65691	0.52302	0.59502	-1.89949	-4.37154	0.64186	-1.48697	0.59502	-0.47287	-5.03947	0.02775	-2.93195	NA	2.64589
comp1112647_c0_seq1	-0.14306	1.61051	1.16009	-0.13722	-2.46137	0.92859	-4.74416	-0.71387	-0.60385	-2.46137	-0.04503	0.12077	3.03169	0.08648	1.40327	-0.57505
comp111267_c0_seq1	NA	NA	0.64664	NA	1.89028	NA	-3.35938	NA	NA	1.89028	NA	NA	NA	NA	NA	NA
comp111284_c0_seq1	0.64653	0.83396	NA	0.09725	NA	-0.76387	-0.61172	0.06555	-0.64926	NA	-0.24892	NA	NA	-2.02926	NA	-2.54157
comp111295_c0_seq1	-0.01323	NA	0.7658	4.17068	0.96615	-2.73644	-2.75958	-0.0223	-0.8054	0.96615	-0.22961	NA	2.40662	2.65083	1.04877	0.27032
comp111309_c0_seq1	0.46468	NA	0.0575	0.25608	-1.57244	-0.56191	0.70414	-0.04438	0.69818	-1.57244	0.50944	-1.09502	0.80676	-0.50615	0.14683	0.55827
comp111311_c0_seq1	-0.4945	NA	0.88726	-0.82941	NA	2.91074	-8.41025	0.5114	1.60245	NA	-2.59171	NA	-0.56745	2.64382	-0.6069	-3.21388
comp11133_c0_seq1	-0.17787	0.11352	0.42655	-0.48065	1.48106	-1.23032	-2.78084	0.39789	-0.15399	1.48106	-0.46981	1.31733	2.03834	-0.641	2.12763	0.22376
comp111330_c0_seq1	-0.12508	NA	1.30209	-0.1469	0.01905	-0.71803	-5.3467	0.97416	0.45963	0.01905	0.34682	1.88005	1.6982	1.64945	-1.49686	3.04428
comp1113311_c0_seq1	NA	NA	NA	0.09725	NA	-0.04121	-0.61169	NA	NA	NA	NA	NA	NA	NA	NA	-2.26489
comp111343_c0_seq1	0.35641	NA	-0.5282	-1.98293	-0.7364	-0.38375	-0.61174	-0.32755	-1.75056	-0.7364	-0.89161	2.78406	-0.80044	-1.53222	-0.23049	5.20552
comp1113437_c0_seq1	0.01932	0.30576	-1.22529	-1.73657	0.96614	-0.25611	-0.6117	0.2953	1.61727	0.96614	0.83772	NA	NA	-0.66072	-0.03968	3.03865
comp111346_c0_seq1	0.25391	0.87435	2.58316	-4.27087	0.65092	-0.52398	-0.61167	1.22605	-1.1488	0.65092	-2.46882	NA	-2.54623	-0.10436	-0.67883	-2.12291
comp111362_c0_seq1	1.51658	NA	NA	NA	0.00436	1.26541	NA	0.06555	0.318	0.00436	-0.01125	NA	-1.32717	-2.02926	0.48184	-4.78652
comp1113637_c0_seq1	NA	NA	0.63829	NA	-0.95741	NA	NA	-2.2431	NA	-0.95741	1.65844	NA	NA	NA	NA	NA
comp111372_c0_seq1	NA	NA	NA	NA	NA	NA	NA	NA	NA	NA	NA	NA	NA	NA	NA	NA
comp11139_c0_seq1	-0.75808	1.87707	2.60175	-0.26816	1.32832	1.13062	3.83089	-0.26316	-0.84529	1.32832	0.37602	-2.67017	2.03834	-0.17396	-0.60279	-1.90187
comp111420_c0_seq1	NA	NA	-1.14969	2.53218	-0.32213	-1.07491	NA	0.44606	NA	-0.32213	1.40167	3.011	0.2636	NA	1.33502	1.37338
comp111421_c0_seq1	0.60832	NA	-0.60761	2.34343	-0.35678	0.56327	-2.78274	0.60185	-3.21932	-0.35678	0.9349	-1.71757	0.34945	1.28011	0.77479	-0.47012
comp111422_c0_seq1	0.41327	NA	0.65578	-0.41296	1.79559	-0.10283	-5.92621	-0.26772	-1.14803	1.79559	-0.19963	0.48101	-1.16517	-0.50516	-0.45356	-0.60431
comp111424_c0_seq1	0.1121	NA	NA	1.20909	-0.70251	0.64373	-1.05386	0.47135	0.43209	-0.70251	0.82918	NA	-0.78702	-0.35596	0.09725	-1.19526
comp111432_c0_seq1	0.92894	NA	1.60044	0.71678	0.01357	1.74669	-0.61168	0.54462	-0.62542	0.01357	0.29113	-3.79946	1.01968	1.22671	0.48184	-3.02657
comp111439_c0_seq1	-0.43937	NA	-1.07889	1.52399	NA	0.68626	2.83092	-1.10555	1.65145	NA	-0.26927	-4.75864	-0.51804	NA	-4.55692	-3.74325
comp111440_c0_seq1	-0.35107	NA	NA	0.09458	-2.39407	-2.72482	5.63831	-1.18056	-0.15399	-2.39407	-0.0101	NA	4.24127	3.56987	NA	1.79389
comp111475_c0_seq1	0.19603	0.90587	-0.35733	NA	0.62219	-2.58111	-0.61172	-0.06281	0.30018	0.62219	0.76612	NA	-1.16517	-3.17411	NA	-0.33371
comp111479_c0_seq1	0.18862	2.10268	2.08137	2.66021	2.47256	-0.68227	-3.74297	-0.88469	1.83881	2.47256	0.15932	NA	-2.16335	-0.42151	0.32446	-0.33343
comp111486_c0_seq1	-0.71554	NA	-1.15958	0.78533	NA	1.30465	-0.61167	-0.33721	NA	NA	-0.20787	NA	1.41333	1.12709	1.61404	-5.50451
comp111489_c0_seq1	0.10908	1.61051	2.35005	-3.18429	1.88048	0.01694	-3.35782	NA	0.3269	1.88048	0.37199	NA	3.03169	NA	-2.29517	-4.51892
comp111511_c0_seq1	-0.2444	NA	-1.22473	-0.97109	0.96615	0.57957	-2.75964	0.94501	NA	0.96615	0.58688	NA	-0.00258	0.18943	-6.47816	0.43933
comp111518_c0_seq1	-0.2795	NA	0.5926	0.36501	-0.22611	1.79837	-4.5673	0.33074	-0.88336	-0.22611	0.62799	1.17029	0.25135	-2.23287	-1.03999	-0.97908
comp111537_c0_seq1	0.21845	-0.15559	-0.01967	-0.23541	NA	-2.92474	0.29841	-4.17187	-0.94829	NA	0.29904	-10.7834	NA	7.17109	-0.94721	1.64263
comp111549_c0_seq1	-0.06766	NA	NA	NA	-0.99786	NA	NA	NA	-0.31272	-0.99786	NA	NA	NA	NA	NA	NA
comp111551_c0_seq1	0.50825	NA	NA	2.65649	2.39937	-1.94024	0.68293	-0.50869	-0.22478	2.39937	2.84839	NA	3.17408	-1.83192	-0.6723	-1.90299
comp1115544_c0_seq1	-0.5591	NA	1.07621	-4.43221	1.81889	3.15724	-0.61168	-0.23071	-0.03979	1.81889	-0.52755	NA	NA	-3.61279	-2.06882	-2.78188
comp111557_c0_seq1	0.57972	-0.08512	NA	NA	0.00439	-0.08894	NA	0.59917	0.3269	0.00439	1.60543	NA	3.17408	NA	-1.285	-2.0984
comp111564_c0_seq1	-0.04169	NA	-0.52183	NA	-1.94287	NA	NA	-0.41534	NA	-1.94287	NA	NA	NA	NA	NA	NA
comp111567_c0_seq1	-0.9331	NA	1.88727	1.33471	-0.67516	0.45448	-2.7596	-0.46003	0.18306	-0.67516	0.31766	1.24583	1.46315	1.06877	0.20549	0.57698
comp1115713_c0_seq1	-0.04168	NA	NA	NA	NA	-0.68227	3.83086	NA	NA	NA	-0.01126	-3.79946	-4.53224	NA	-3.03694	1.37352
comp111572_c0_seq1	0.14162	NA	1.98349	3.61213	-0.99629	-3.95922	-4.08049	-1.28513	4.02304	-0.99629	-2.84864	-5.12564	1.18572	1.58514	0.94346	3.50949
comp111587_c0_seq1	0.90205	NA	0.39085	NA	1.03059	-0.14792	NA	NA	NA	1.03059	NA	NA	3.30478	NA	NA	NA
comp111597_c0_seq1	-0.04113	NA	-0.25111	-0.2848	0.08739	-0.53856	-2.75966	0.31631	0.99769	0.08739	-0.3766	-1.59835	-0.27866	-0.26363	2.449	2.59619
comp111599_c0_seq1	-0.04169	-0.36321	NA	0.09723	NA	2.21276	0.94827	1.6565	-0.15399	NA	0.80881	NA	1.42224	2.57213	NA	-1.45403
comp111600_c0_seq1	1.18296	NA	-2.78685	-1.35325	NA	-0.04123	-5.37784	2.08537	-4.27037	NA	-0.54731	NA	1.61415	2.31121	-5.2385	-2.21392
comp111601_c0_seq1	NA	1.43368	NA	NA	0.70692	4.09422	-8.15574	1.4105	NA	0.70692	3.08063	NA	1.47444	NA	NA	-0.33344
comp111602_c0_seq1	-0.12584	NA	0.63829	-0.59049	-0.9574	1.36107	-0.09552	0.89289	-0.74875	-0.9574	-0.72315	NA	0.9408	0.05557	-0.94469	-1.4156
comp111608_c0_seq1	-0.10169	NA	0.3645	0.84915	2.35086	2.58929	2.23735	-0.91389	-0.44111	2.35086	0.25128	-2.99841	4.02805	-0.10458	-0.61715	-1.33149
comp111612_c0_seq1	0.34662	1.61051	NA	0.14282	0.00438	0.79635	-0.61175	0.58099	0.97247	0.00438	0.29241	NA	4.10394	-1.79994	-1.12102	0.69116
comp1116136_c0_seq1	-1.35271	1.63592	3.06508	-8.43538	NA	1.75703	NA	-0.65153	2.9424	NA	-4.962	-7.4191	NA	NA	1.44363	-0.33364
comp111616_c0_seq1	-0.15303	NA	NA	0.09722	NA	1.73675	-2.75954	-0.33529	0.30542	NA	0.49711	NA	-1.13398	1.20368	0.48918	3.49667
comp111620_c0_seq1	NA	NA	NA	NA	NA	NA	NA	NA	NA	NA	NA	NA	NA	NA	NA	NA
comp1116239_c0_seq1	NA	NA	NA	4.94142	NA	NA	NA	0.55213	NA	NA	NA	NA	3.61426	NA	NA	NA
comp111624_c0_seq1	0.69435	0.55507	0.33218	0.06732	0.05282	-0.78524	2.36452	0.52564	-0.2568	0.05282	-0.09752	-2.42544	0.86822	0.49759	-1.10486	1.9854
comp111629_c0_seq1	0.50513	0.458	-0.9967	-0.648	0.11242	0.37062	-0.61165	-0.51414	-0.04561	0.11242	0.71015	NA	0.02775	2.1969	NA	2.42468
comp111631_c0_seq1	0.27891	0.0793	-1.22473	0.09726	-1.43564	1.25077	-0.61165	1.29015	-0.59912	-1.43564	2.96681	NA	1.62319	2.57213	NA	-0.33354
comp111648_c0_seq1	-0.50461	NA	NA	0.59881	0.00438	1.18107	NA	NA	0.45387	0.00438	NA	NA	-0.95382	4.07227	NA	-6.18191
comp111662_c0_seq1	-0.44269	NA	-1.74106	-1.33144	-1.56333	-0.04118	2.71794	4.1206	-4.76352	-1.56333	-1.66574	-9.04706	3.61426	-2.15518	-5.56634	2.9862
comp111664_c0_seq1	NA	NA	NA	1.07168	NA	-2.1666	NA	NA	-0.15399	NA	2.40467	NA	1.93876	NA	NA	-0.33346
comp111669_c0_seq1	0.18434	NA	0.83139	-0.50115	0.00436	-1.53679	-1.47851	-0.33191	-2.59678	0.00436	0.27595	-4.84439	-3.20802	-3.02802	-2.56487	2.44713
comp1116747_c0_seq1	-0.63791	NA	-1.56895	-1.2347	0.00438	-0.04118	-0.61175	-0.43988	1.22653	0.00438	-1.67047	NA	-2.89252	-3.51529	-1.00256	-3.09409
comp1116782_c0_seq1	NA	-0.45375	0.63829	-3.27193	-1.80902	-0.94677	NA	2.01177	-0.89043	-1.80902	-0.97302	NA	0.25713	NA	NA	-3.10065
comp111680_c0_seq1	0.09419	NA	-1.79372	-0.3448	0.14346	-6.1218	7.36655	-0.30299	-2.18642	0.14346	0.92446	-3.98641	2.36295	2.1126	-2.27714	5.30873
comp111683_c0_seq1	-0.97966	NA	1.30274	-0.32778	-0.52179	1.91248	-0.64549	0.03018	-1.56581	-0.52179	0.83619	-8.17627	-1.1939	-0.41796	1.1783	-0.33146
comp1116854_c0_seq1	0.78199	NA	-1.22473	-0.79208	0.00436	-2.62317	0.683	2.58829	NA	0.00436	-0.08472	0.2532	2.03834	-1.12259	NA	-2.10666
comp111688_c0_seq1	0.82249	0.56593	NA	NA	-1.81332	2.93679	NA	NA	-1.09377	-1.81332	1.68692	-3.22694	1.25069	NA	NA	-6.4617
comp111700_c0_seq1	-0.58641	1.00747	0.88979	0.74682	0.92093	1.58321	-0.48067	-0.09999	0.36468	0.92093	-0.08576	NA	0.74617	-0.46031	-3.22809	0.90972
comp111702_c0_seq1	-1.05235	0.32346	1.58076	0.33536	NA	-0.82497	-1.77614	-2.19655	-0.59771	NA	-1.79631	-3.88116	2.03834	3.15505	2.34445	-0.25561
comp111712_c0_seq1	-0.48653	0.56593	-0.2938	-0.86267	-0.78453	0.69705	0.66018	-1.46958	0.34131	-0.78453	-1.03734	-1.41498	-0.73111	NA	1.91406	-0.13114
comp111716_c0_seq1	0.14704	NA	-1.22473	3.1282	0.54524	-2.38801	1.3867	1.39523	-2.05649	0.54524	1.49178	0.6181	1.12192	3.30155	-3.13564	2.3059
comp111718_c0_seq1	0.93384	NA	NA	-4.64423	0.52441	2.38254	NA	0.52762	-2.26375	0.52441	1.92586	NA	2.03834	NA	1.41062	1.42333
comp111721_c0_seq1	0.27891	NA	NA	0.09725	-0.9574	1.77614	NA	0.36883	NA	-0.9574	-1.34355	NA	1.02846	-4.83088	2.37241	-3.35724
comp1117245_c0_seq1	0.21333	0.56593	NA	NA	NA	NA	NA	NA	-2.12509	NA	NA	-3.64811	NA	NA	NA	NA
comp111727_c0_seq1	0.12059	NA	-1.99614	-0.27763	0.40155	-4.20838	4.59419	-0.48111	-3.3939	0.40155	1.7136	-2.80585	1.46315	-0.41298	-1.15921	4.76709
comp111729_c0_seq1	-0.02762	NA	0.63829	0.09725	-0.85156	1.67507	2.83091	-0.17012	0.3269	-0.85156	-0.97729	NA	-2.54623	NA	-2.40737	-3.08134
comp111730_c0_seq1	0.00646	0.57761	0.4026	4.17062	0.00436	1.19366	-1.96019	0.42955	1.59826	0.00436	0.2634	NA	-0.67786	0.07431	-7.42788	6.30058
comp111731_c0_seq1	NA	1.87707	NA	4.26362	NA	-2.5623	-4.32173	-2.55581	NA	NA	3.41752	NA	0.52469	NA	NA	0.48825
comp111734_c0_seq1	NA	1.63592	-1.32077	NA	-2.34536	-0.04121	NA	NA	-1.08108	-2.34536	NA	NA	NA	NA	NA	NA
comp111740_c0_seq1	-0.15676	1.63592	1.16869	0.56954	1.91786	-1.38479	-1.31829	0.9441	0.04519	1.91786	0.33827	0.80038	0.90832	4.44731	0.26867	1.8966
comp111745_c0_seq1	-0.36228	0.38683	NA	NA	0.00437	-1.44375	-0.61173	-0.57311	NA	0.00437	-0.27084	-9.06444	NA	-3.3361	-1.29121	2.32449
comp111749_c0_seq1	0.13324	0.11352	NA	-0.77267	NA	-1.80246	-1.06478	0.21461	1.48894	NA	-0.94153	NA	-0.78715	0.6251	-1.74126	-0.36418
comp11175_c0_seq1	-0.11149	NA	0.91116	-2.49958	0.58373	-1.83873	2.83095	-0.6981	-2.23961	0.58373	0.2557	NA	0.68703	0.96816	-1.32096	0.75939
comp111755_c0_seq1	NA	NA	-1.07889	NA	NA	-0.04121	NA	NA	-0.22442	NA	NA	NA	2.299	NA	NA	-3.21404
comp111755_c1_seq1	-0.36421	1.10053	NA	NA	-0.9574	NA	NA	0.54644	-1.2959	-0.9574	NA	NA	5.1156	NA	NA	NA
comp111757_c0_seq1	NA	NA	NA	-3.35312	NA	0.59991	-0.61167	NA	NA	NA	NA	NA	-5.45671	NA	NA	NA
comp111765_c0_seq1	-0.05746	NA	-2.16239	-3.49968	NA	4.61462	-0.61172	0.54644	2.63418	NA	NA	2.24898	-2.54623	1.72252	-1.99375	-4.64155
comp111774_c0_seq1	NA	NA	-2.2784	NA	0.96615	2.48931	NA	NA	-3.45762	0.96615	0.01735	NA	NA	NA	NA	-3.26613
comp111777_c0_seq1	0.25015	1.28374	-0.88632	-1.45051	-1.88445	-0.04121	-0.61165	0.59754	NA	-1.88445	NA	NA	3.30478	NA	NA	-0.33344
comp111786_c0_seq1	1.37968	2.0675	-2.67882	NA	NA	NA	-2.4598	NA	NA	NA	NA	NA	NA	NA	NA	NA
comp111792_c0_seq1	0.09987	NA	0.05481	0.99682	0.09993	-1.85167	-0.61174	2.67554	-1.26409	0.09993	-0.13146	NA	-1.1939	-0.54588	1.74091	0.43602
comp1117929_c0_seq1	0.1064	NA	NA	0.12786	-0.9574	-2.86426	NA	0.9847	NA	-0.9574	-0.01122	NA	-1.58019	1.71315	-1.285	-1.18654
comp111793_c0_seq1	0.29382	NA	0.58407	-0.7969	0.00436	-2.76896	2.18249	2.19858	-1.85065	0.00436	0.04009	1.38133	-0.56696	-0.2001	-2.54889	3.25571
comp111804_c0_seq1	NA	NA	NA	NA	NA	NA	NA	NA	NA	NA	NA	NA	NA	NA	NA	NA
comp111809_c0_seq1	0.09678	1.87707	0.25804	-2.10591	0.96615	0.77581	-5.05355	0.17625	-0.84812	0.96615	-0.38336	-0.51164	-0.03869	0.26215	2.6054	3.34977
comp1118138_c0_seq1	NA	NA	NA	NA	NA	2.20613	NA	0.14659	NA	NA	-0.43175	NA	2.03834	NA	2.97637	-0.33343
comp111814_c0_seq1	-0.47898	0.55507	1.12904	0.09725	NA	-0.61287	NA	0.9706	-0.25285	NA	0.35189	NA	NA	-6.84039	NA	-5.214
comp111818_c0_seq1	0.14061	NA	NA	0.83278	0.00436	-0.15292	7.07887	-0.73715	-0.3564	0.00436	-0.32395	NA	4.10394	-1.25227	-0.50851	1.24559
comp111819_c0_seq1	-0.91225	NA	2.06562	-1.24512	0.76656	3.41616	-5.2308	0.50317	-0.22328	0.76656	0.4379	-1.24578	-0.07812	0.0088	-4.26644	-6.01929
comp111867_c0_seq1	-0.07139	NA	-0.78303	0.03514	0.86861	-0.35085	-0.6117	-0.21414	-1.9065	0.86861	0.14915	-0.06953	2.89889	0.05126	-0.36068	2.56113
comp111869_c0_seq1	-1.52541	NA	0.63829	-4.64412	-2.84511	-1.62847	-0.61165	-0.89366	-0.22302	-2.84511	-0.96632	NA	NA	NA	0.60178	2.96343
comp111878_c0_seq1	0.27891	NA	0.4156	-0.03653	NA	-0.71644	-4.32173	1.00976	-3.23615	NA	-0.46944	-3.0674	0.53774	2.71595	NA	1.10579
comp111895_c0_seq1	NA	NA	NA	NA	NA	NA	NA	NA	NA	NA	NA	NA	NA	NA	NA	NA
comp11190_c0_seq1	-0.36417	NA	1.23512	NA	0.00436	NA	NA	NA	NA	0.00436	NA	0.25374	NA	NA	NA	NA
comp111910_c0_seq1	-2.4525	NA	NA	0.09724	NA	-0.87568	-0.61176	0.06555	-1.8414	NA	0.25282	-5.90791	NA	-0.81686	-0.12728	-0.33357
comp111912_c0_seq1	-0.98194	1.61051	1.7729	1.19826	0.17722	-2.47685	1.29632	-0.73317	-0.32605	0.17722	1.83473	0.64879	1.16537	1.47939	-0.62658	1.99781
comp111923_c0_seq1	0.60371	-0.19886	NA	0.74969	NA	-3.62069	3.72073	-2.04379	-3.18903	NA	-0.14488	-1.6528	0.63056	2.70423	-2.50173	1.99634
comp111927_c0_seq1	0.27891	NA	-0.34016	-1.62158	NA	-0.04128	-3.35941	4.07987	-5.01055	NA	-2.15763	NA	3.80408	NA	NA	-0.33344
comp111930_c0_seq1	0.27891	NA	-0.2938	NA	NA	-0.68238	-2.77509	NA	NA	NA	NA	NA	-0.31853	NA	-3.45604	0.68209
comp111934_c0_seq1	-1.1421	0.56593	0.26971	-0.1418	-1.88316	0.91565	-2.75963	-0.22858	-0.44395	-1.88316	0.07793	NA	2.03834	-0.39735	NA	-0.68577
comp111936_c0_seq1	0.0101	NA	0.05651	-0.33591	-0.25055	1.04583	2.83093	-0.62581	1.7999	-0.25055	1.27944	3.13432	-0.57919	0.55157	1.83913	-1.32444
comp111945_c0_seq1	0.23647	NA	0.26519	-1.74914	0.60237	-0.47567	-4.7336	-0.72583	-1.68164	0.60237	0.20668	-1.5547	0.85011	0.09399	4.17668	1.76895
comp111955_c0_seq1	0.73097	NA	2.13657	-0.00241	-0.55899	-0.04121	-2.75954	-0.15435	0.80779	-0.55899	-0.92891	NA	-0.56529	3.8916	-0.6723	NA
comp111959_c0_seq1	NA	1.30638	-1.68776	NA	-1.08917	NA	-7.49968	NA	NA	-1.08917	NA	NA	NA	NA	-1.83298	NA
comp111961_c0_seq1	-0.23444	0.55507	-1.56817	-2.19208	-0.21646	0.89123	-4.0827	0.48495	-0.82637	-0.21646	-0.10295	-1.40906	NA	-1.39861	2.80662	3.12134
comp1119635_c0_seq1	0.23216	-0.36043	NA	-3.18406	NA	NA	NA	-1.91492	1.9483	NA	-0.01124	NA	NA	NA	NA	NA
comp111969_c0_seq1	-0.52049	0.11352	NA	2.12287	NA	0.88645	NA	NA	0.70153	NA	NA	NA	NA	2.79199	-0.67402	-6.78828
comp111972_c0_seq1	0.62801	0.84482	0.63829	0.14396	NA	0.88294	-3.35945	0.81329	-0.60909	NA	0.78013	NA	2.299	-0.48812	-2.70892	-1.87294
comp111974_c0_seq1	-1.40631	NA	-2.56779	-0.96877	NA	-1.48497	-3.74297	0.89539	1.23715	NA	-0.98118	-4.75864	NA	NA	-3.5096	0.51137
comp111984_c0_seq1	0.19255	NA	0.24418	-2.23362	-0.954	-0.43227	-0.64092	0.08753	-0.58327	-0.954	-0.15286	2.90236	-2.16335	-0.04917	0.05672	0.3217
comp111987_c0_seq1	0.45212	0.56593	-0.17792	-0.8359	-0.11737	-0.75372	-4.92567	-0.0601	NA	-0.11737	0.43276	NA	2.68821	-0.33368	-0.15945	-1.10804
comp112002_c0_seq1	-0.03882	0.56593	0.52432	-7.74963	0.96614	0.00299	-1.12462	-0.57156	-0.75421	0.96614	-0.47708	-1.91311	-1.09809	0.07643	-1.45601	2.00852
comp112003_c0_seq1	-1.32822	NA	0.80634	-5.04309	0.00438	0.82841	NA	-1.38	0.80779	0.00438	-0.41453	NA	3.17408	NA	NA	0.8232
comp112005_c0_seq1	NA	0.83396	-1.79311	NA	-1.80776	1.25239	-3.35938	0.6366	-3.05026	-1.80776	1.03805	NA	-3.7288	NA	NA	-2.09321
comp112009_c0_seq1	0.9201	1.61051	NA	-2.09467	NA	-0.04121	NA	-0.83141	0.3269	NA	1.80498	NA	NA	2.72597	NA	1.37356
comp112013_c0_seq1	0.3284	-0.03383	0.17618	-1.01467	0.38073	0.30095	1.04579	0.22703	-0.77128	0.38073	0.18876	0.04005	1.30106	-0.99874	2.39829	1.07947
comp112023_c0_seq1	0.5995	NA	-0.85603	0.06418	0.03074	1.87192	-3.35946	-1.52874	0.07921	0.03074	-1.44948	0.37847	-3.53721	0.37935	NA	-0.33371
comp112036_c0_seq1	NA	NA	0.63829	NA	NA	NA	NA	NA	NA	NA	NA	3.0957	NA	NA	NA	NA
comp112040_c0_seq1	0.70769	NA	-1.24701	-1.17408	1.46821	0.01786	-0.88484	-0.61676	-0.66104	1.46821	0.1126	NA	-0.43462	-2.93195	NA	0.58338
comp112043_c0_seq1	0.22152	1.89868	0.05877	1.56792	0.69685	2.22474	2.83091	0.36224	0.36797	0.69685	-0.39521	-0.07241	3.71276	-0.84176	-2.94577	-1.65898
comp112047_c0_seq1	-0.04169	0.55507	1.20377	-0.97461	0.00436	-0.07558	NA	0.5952	0.77638	0.00436	-0.08473	1.37426	4.17419	0.85509	NA	7.90461
comp1120571_c0_seq1	-0.53536	NA	-0.9836	2.21283	-0.85756	-0.9995	-0.7818	0.61481	-1.19483	-0.85756	0.82599	1.88005	-0.46672	-0.61646	-1.0043	1.15913
comp112059_c0_seq1	0.52075	NA	-0.77736	0.29541	-0.16754	0.84377	NA	0.4014	-1.08672	-0.16754	0.07799	2.90236	-0.18315	1.06914	-1.74844	-1.34715
comp112065_c0_seq1	NA	-0.19345	NA	NA	NA	NA	NA	NA	0.03769	NA	NA	NA	NA	NA	NA	NA
comp112070_c0_seq1	0.63865	-0.43012	-2.48752	NA	0.96615	0.61056	-0.61172	-0.96986	0.21717	0.96615	0.24455	NA	-2.54623	-0.31154	-3.63238	-0.33348
comp112074_c0_seq1	-0.27812	NA	2.15908	0.21942	0.34671	0.2926	-1.16725	-0.02882	0.21313	0.34671	-0.16759	-1.49057	-0.04545	0.97413	0.39586	0.77828
comp112083_c0_seq1	-0.12178	1.63592	0.64957	NA	1.88196	NA	NA	-1.48509	-0.15399	1.88196	NA	NA	3.30478	NA	NA	NA
comp112084_c0_seq1	0.48987	NA	-0.08309	-0.09378	0.78578	-1.2108	-2.75961	-0.11677	-2.51755	0.78578	1.76078	-0.40864	-3.53721	-3.02802	1.58781	0.22506
comp112087_c0_seq1	-0.02554	NA	1.46588	-1.76171	NA	-0.64594	-0.6117	-0.28641	-0.84269	NA	-0.18892	NA	3.20022	-0.5949	0.95593	0.09613
comp112093_c0_seq1	0.06525	NA	-0.36925	-1.98306	0.8921	0.82511	-0.61175	0.95597	-0.94068	0.8921	-1.53446	0.88659	-2.30363	0.33268	-0.36456	-0.33359
comp112115_c0_seq1	0.29406	NA	-0.08057	0.6883	-0.99986	-1.16424	2.83092	0.42169	-0.06836	-0.99986	0.29146	0.15898	-3.53721	-3.26439	0.0797	-0.10866
comp112122_c0_seq1	-0.07657	NA	0.27067	-2.37199	-0.8576	-2.90895	1.15967	0.76284	0.0209	-0.8576	-1.19628	-3.54198	-0.46672	1.36647	-1.1084	2.7577
comp112125_c0_seq1	NA	0.56593	NA	2.42055	NA	-0.75208	-0.61165	0.06555	NA	NA	-0.84705	NA	NA	2.20228	NA	-1.90654
comp112125_c1_seq1	0.5995	NA	NA	0.09725	NA	2.40191	-0.61166	0.90668	NA	NA	-1.54096	NA	2.299	-0.715	NA	-1.86699
comp112129_c0_seq1	-1.00866	NA	-1.37584	1.52568	-0.90741	0.82847	-0.61165	-0.65873	2.33904	-0.90741	0.02974	NA	NA	1.71315	-1.32765	1.99238
comp112136_c0_seq1	-0.11044	0.55507	-1.22473	-1.38905	NA	0.00727	-2.28599	0.54041	0.04813	NA	0.48375	NA	0.89326	0.65378	1.98517	1.59094
comp112139_c0_seq1	-0.84844	NA	NA	NA	NA	0.59995	NA	2.22186	NA	NA	NA	NA	NA	NA	NA	-0.33344
comp112153_c0_seq1	NA	NA	NA	NA	NA	NA	NA	NA	NA	NA	NA	NA	NA	NA	NA	NA
comp112179_c0_seq1	NA	1.61051	NA	NA	NA	NA	NA	NA	NA	NA	0.95055	NA	-2.54623	NA	NA	NA
comp1121804_c0_seq1	0.83393	NA	0.06765	-0.37759	0.69467	-2.58979	-4.73573	0.98949	-1.9138	0.69467	0.95186	0.51029	2.03834	-3.17411	0.02815	1.25781
comp112182_c0_seq1	0.98229	NA	-2.63537	2.25514	NA	-2.88108	-1.17553	-0.39063	-0.56553	NA	0.06341	-2.12012	-1.16517	NA	-3.60378	1.42367
comp112200_c0_seq1	-0.65183	NA	0.5168	0.35692	-0.56518	0.52253	-5.9571	0.06081	0.37892	-0.56518	-0.79659	-4.8264	NA	0.59686	-0.96806	0.41392
comp112202_c0_seq1	-0.01117	0.76207	0.09615	-0.15985	-1.53115	-0.38544	-1.48456	-0.4282	-1.23593	-1.53115	1.18086	3.11514	-1.00539	0.18396	-3.53247	-1.35356
comp112204_c0_seq1	0.07294	NA	0.63829	-2.19617	NA	-1.35398	-0.34571	-1.05692	-1.33254	NA	0.31329	NA	-0.23291	0.60176	-1.21166	0.83045
comp112204_c1_seq1	0.50293	NA	-0.55248	-1.37172	NA	-0.72862	-3.28144	-1.97866	0.13056	NA	NA	-2.15083	-0.57919	NA	0.67758	1.60574
comp112213_c0_seq1	0.58478	NA	0.41421	0.10521	-0.01308	0.34974	3.83083	0.29068	-0.42078	-0.01308	-0.94023	1.79941	-0.23291	0.81657	0.25235	-2.82936
comp112215_c0_seq1	NA	1.63592	0.56987	-2.19205	0.96615	3.53442	NA	NA	NA	0.96615	NA	-5.08737	-0.7633	NA	NA	3.24714
comp112216_c0_seq1	-0.26979	0.55507	NA	0.20421	NA	-0.06042	NA	0.17925	0.0734	NA	-0.85511	-3.79946	2.299	NA	NA	6.71415
comp112222_c0_seq1	-0.43025	1.61051	1.26791	-0.02351	1.87721	0.83147	-0.61168	-0.43137	0.3269	1.87721	-0.11557	-1.58339	-1.16517	-0.90063	2.37241	-2.59724
comp112227_c0_seq1	NA	0.11352	0.77906	NA	0.16427	1.20167	NA	-0.41534	-0.81927	0.16427	1.80557	NA	NA	-2.02926	NA	-0.33346
comp112230_c0_seq1	NA	NA	NA	NA	NA	-1.08278	NA	0.06555	2.34695	NA	-2.09304	NA	-2.54623	NA	NA	2.28141
comp112231_c0_seq1	-0.06912	NA	-1.91735	0.32289	0.02238	1.25121	-0.6117	0.25548	-0.59823	0.02238	0.52992	2.35047	1.80932	-1.56464	-3.43206	-0.43395
comp112232_c0_seq1	-0.27788	1.63592	0.64505	0.46243	-0.70842	0.92839	-2.75961	1.40011	0.21276	-0.70842	2.94089	0.42728	-4.25252	2.38433	-1.83298	1.82745
comp112242_c0_seq1	0.02115	NA	1.25126	0.09724	0.96615	-1.83522	-2.80422	-0.17801	-0.89001	0.96615	0.37098	1.25065	3.03169	2.04841	2.494	-4.1004
comp1122461_c0_seq1	0.27891	NA	-1.32077	-0.79737	0.00438	0.59997	NA	1.8386	1.54421	0.00438	-2.16839	NA	-0.8087	-0.12076	NA	-0.33352
comp112253_c0_seq1	0.34376	NA	NA	NA	NA	0.14062	NA	-0.85033	NA	NA	NA	NA	2.23331	NA	NA	-0.33343
comp112254_c0_seq1	0.80125	NA	-1.05205	-0.20382	NA	-1.25378	-0.61192	1.02734	0.77822	NA	NA	-8.10874	2.56297	NA	1.46353	0.81321
comp112257_c0_seq1	-0.55506	NA	1.241	1.62401	-0.66863	-2.12187	NA	-0.12702	-2.93221	-0.66863	-0.17049	0.70396	0.26508	-1.12259	1.44363	3.5801
comp112263_c0_seq1	-0.0428	1.61051	NA	NA	0.00438	0.09817	1.61869	NA	-0.55679	0.00438	-0.32788	NA	-3.53721	0.43438	-5.60275	-6.00181
comp112276_c0_seq1	0.2483	NA	1.35666	NA	0.96615	-0.04121	NA	NA	NA	0.96615	NA	0.2311	0.43297	NA	2.956	-0.33348
comp112279_c0_seq1	2.64762	1.1764	-1.30624	NA	-1.99448	1.15992	-0.61165	0.68079	-0.15399	-1.99448	-0.01122	0.43256	2.03834	NA	0.15217	-4.43693
comp112287_c0_seq1	NA	0.83396	-1.22473	NA	NA	-0.68236	NA	-1.42242	NA	NA	NA	NA	NA	NA	NA	-0.33356
comp112287_c1_seq1	NA	0.85938	NA	NA	NA	NA	NA	NA	NA	NA	NA	NA	NA	NA	NA	NA
comp1122897_c0_seq1	-0.47162	2.0675	-2.71716	-0.12326	0.00435	0.46403	-0.61167	-0.40954	0.00329	0.00435	-0.17603	-0.73281	0.52469	0.40574	-1.08614	-7.58574
comp112294_c0_seq1	0.61751	0.10544	0.41003	-0.92075	-0.76816	1.21891	NA	0.16485	-0.60927	-0.76816	0.1629	-2.46901	3.17408	0.75856	NA	0.02159
comp112296_c0_seq1	-1.14425	NA	1.08526	-0.03972	0.03443	-0.37016	0.6946	-0.5039	-0.42883	0.03443	-0.50998	1.9673	0.10215	-2.20948	2.64921	1.04681
comp112297_c0_seq1	-0.14695	NA	-0.6863	-3.18514	0.04515	-0.04122	-4.77571	1.47433	1.59078	0.04515	0.65842	-0.38944	4.17419	1.73046	-0.48693	-0.33344
comp11230_c0_seq1	NA	0.56593	NA	0.09725	NA	-0.97226	-0.61165	-1.98457	NA	NA	-0.01128	NA	NA	-4.17508	NA	-0.3336
comp1123014_c0_seq1	0.00225	NA	0.5168	1.49534	0.00436	-1.81272	-0.61172	0.22734	-0.49753	0.00436	-0.61502	-3.79946	-2.54623	3.82867	NA	0.80384
comp112303_c0_seq1	0.10636	1.61051	1.67894	1.92192	0.23684	0.0662	-5.23	0.73872	0.74185	0.23684	0.80194	-3.90607	-0.29196	6.73468	-0.34177	-3.25667
comp112308_c0_seq1	0.50644	NA	0.11549	-0.21283	-1.72945	-0.92088	-0.61171	-0.07884	-1.34998	-1.72945	-1.77819	-4.75864	2.03834	0.17783	-2.2404	-2.32256
comp1123086_c0_seq1	-0.24086	0.76848	NA	-0.76463	0.00436	1.31218	NA	-1.09196	-1.81305	0.00436	-0.63558	NA	-1.28043	-5.20099	-1.53603	1.42249
comp112316_c0_seq1	-0.11954	NA	-0.15539	-0.74963	0.49575	1.74339	-4.32181	-0.25969	-2.12391	0.49575	-0.01125	0.37847	NA	1.72252	1.44363	-2.96445
comp112319_c0_seq1	0.00786	NA	-2.50039	-5.15052	-0.30346	1.24593	5.63829	0.37727	-1.07282	-0.30346	-2.19236	-4.1608	-1.81276	-0.96472	-5.60389	-2.1866
comp112320_c0_seq1	0.06675	NA	-1.84787	4.09091	NA	-0.33819	0.49113	0.1766	-2.69709	NA	1.72876	-1.81026	-2.54623	6.64192	0.01549	1.23153
comp112327_c0_seq1	0.6604	NA	-1.22473	-2.50134	NA	-4.60281	5.15285	-0.82918	-1.08984	NA	-0.973	0.37847	NA	NA	-0.60764	4.16498
comp11233_c0_seq1	0.6278	NA	0.36709	-1.39729	0.89531	-0.11344	-0.61172	-0.16393	-0.08044	0.89531	-0.45753	0.25374	2.38189	-0.53476	-1.70974	-0.19069
comp112332_c0_seq1	-0.06772	NA	4.1951	0.17451	-0.03797	2.6522	-7.52011	0.19709	0.78247	-0.03797	0.55872	-6.06665	-3.53721	2.9532	-0.16895	-0.33354
comp11234_c0_seq1	0.16657	NA	NA	-1.61274	NA	-0.05915	0.66035	-0.00513	-0.34142	NA	0.22648	NA	2.299	0.0091	2.99627	-5.00276
comp112341_c0_seq1	-0.26917	1.61051	0.71219	5.21149	-0.02609	0.80531	2.83095	-0.21167	0.57084	-0.02609	-0.385	0.25374	NA	-0.41463	1.31872	0.08763
comp112345_c0_seq1	-1.05059	0.6441	-1.41737	-2.19205	0.36891	-2.36955	-4.32178	0.89453	3.47292	0.36891	-2.82913	NA	-0.57919	NA	NA	-2.09321
comp112363_c0_seq1	1.14401	NA	2.33145	0.09725	0.00436	1.75287	-0.61169	1.40363	0.81258	0.00436	-0.97299	-5.70847	-0.09543	-0.17424	NA	-0.33353
comp11237_c0_seq1	0.558	0.56593	1.17266	3.54537	-2.39683	-2.12705	-2.75962	-1.16603	0.22019	-2.39683	-0.04921	-2.30994	NA	0.8741	1.2301	-1.10279
comp112377_c0_seq1	-0.12357	NA	NA	NA	2.90687	NA	-2.76907	NA	NA	2.90687	NA	NA	NA	NA	3.88604	NA
comp112377_c1_seq1	0.9201	NA	NA	NA	1.22935	NA	NA	NA	NA	1.22935	NA	NA	NA	NA	NA	NA
comp112383_c0_seq1	0.13449	NA	-0.9251	0.18406	-1.02386	1.69569	-3.74294	0.6851	-0.19715	-1.02386	0.30296	-3.91972	NA	-2.17459	4.38252	-0.69149
comp112400_c0_seq1	NA	NA	0.63829	NA	NA	NA	NA	NA	NA	NA	NA	NA	NA	NA	NA	NA
comp1124090_c0_seq1	0.02636	NA	-1.02201	-1.35791	0.91089	0.93111	-2.78557	-0.52746	-0.36563	0.91089	-1.67409	-3.45807	-0.31853	-0.15516	1.28844	-3.25846
comp112417_c0_seq1	-1.09937	2.81837	0.86332	2.05579	-0.25192	1.45944	-2.75966	0.80476	0.77547	-0.25192	0.14006	0.55185	0.88763	5.08639	-0.52234	-0.14483
comp112422_c0_seq1	-0.30281	0.56593	-1.22473	NA	NA	-0.77434	NA	NA	-0.40232	NA	1.95194	NA	4.34935	NA	1.44363	-3.79305
comp11243_c0_seq1	0.01531	NA	0.79591	0.37053	0.00438	0.21806	0.65934	0.30127	0.14856	0.00438	-0.00566	NA	NA	-0.21239	0.83354	-2.45937
comp112430_c0_seq1	0.08844	NA	-0.82161	-2.28094	0.40647	-2.91801	2.04933	0.28009	0.08382	0.40647	0.78814	-3.4697	1.39286	2.34804	-0.19439	0.74105
comp112439_c0_seq1	-0.55924	1.85499	-0.29271	0.12822	1.88271	0.76043	-2.7638	0.30207	0.43821	1.88271	-0.23926	-1.01747	NA	2.73315	2.05113	-1.84462
comp112442_c0_seq1	0.5113	NA	NA	1.20842	-0.46752	0.77534	-1.06378	0.25026	-0.49671	-0.46752	0.35574	NA	0.88024	-0.59022	-1.64812	-1.27254
comp112447_c0_seq1	-0.20283	NA	-0.99336	-2.21157	NA	-0.68226	NA	-0.26932	0.55799	NA	1.88366	NA	NA	-0.5983	NA	-0.33345
comp112451_c0_seq1	0.6078	NA	NA	1.28983	NA	2.26075	-0.61168	-1.19116	1.08692	NA	-0.50546	NA	-1.03051	0.78771	-1.21368	-0.33355
comp112460_c0_seq1	0.04752	NA	NA	NA	-2.44008	NA	NA	NA	-1.45521	-2.44008	-0.97302	NA	NA	1.64704	NA	NA
comp1124626_c0_seq1	0.41493	NA	2.1937	NA	NA	-0.55436	NA	1.11399	-0.0603	NA	0.81014	NA	-2.89252	-1.80736	-0.74004	-4.00587
comp112483_c0_seq1	0.23332	NA	4.6542	-6.0873	0.00437	5.12926	-2.20786	-0.16302	3.02289	0.00437	-4.04914	-7.63044	-4.14089	2.34998	1.79635	-9.97252
comp112486_c0_seq1	1.37107	NA	-0.14796	0.12926	-0.95742	0.81728	-0.61168	-0.96534	0.32538	-0.95742	1.32707	1.60916	2.03834	3.72105	NA	-4.73865
comp112500_c0_seq1	0.08429	NA	0.44077	0.83316	-0.17263	2.44121	NA	NA	1.47388	-0.17263	-0.28185	0.64025	0.32676	0.3076	NA	-6.60402
comp112502_c0_seq1	-0.00666	NA	NA	3.54529	NA	1.45048	2.83088	-0.38855	1.29395	NA	-2.23589	NA	3.03169	-0.85406	-0.15748	0.64179
comp112510_c0_seq1	-0.00745	NA	0.66191	-4.35246	0.53646	1.44639	-1.13014	-0.25315	2.72646	0.53646	0.43335	3.05647	0.08423	-0.5034	-1.48764	-4.65935
comp112513_c0_seq1	-0.22485	1.63592	-0.49933	0.97633	-0.06404	-0.63314	-2.01288	0.45555	-1.02411	-0.06404	1.10292	0.55939	-0.8087	-0.58765	-0.45873	-1.94428
comp112515_c0_seq1	NA	NA	NA	0.09723	NA	-0.04121	-3.35941	-0.41534	-1.21573	NA	2.89271	0.37847	-2.89252	2.72597	-2.4818	NA
comp1125180_c0_seq1	0.4928	NA	-0.5609	-1.28877	0.21517	-2.37464	-2.75964	-1.36964	0.79287	0.21517	0.08443	-1.31589	-0.23291	-0.71935	1.14427	3.74464
comp1125183_c0_seq1	-0.36228	NA	-1.25479	0.30394	2.42545	-2.43082	-2.75957	-0.57522	-1.33931	2.42545	1.11529	NA	0.17847	NA	NA	-0.33357
comp112520_c0_seq1	0.66112	0.56593	1.48327	0.17607	-1.09521	0.37111	NA	0.17408	-0.29355	-1.09521	0.22162	1.52121	2.16585	1.96529	0.29109	-0.72978
comp112528_c0_seq1	-0.40279	NA	-1.22391	NA	NA	-0.04121	NA	NA	NA	NA	NA	NA	-4.1189	NA	NA	NA
comp112535_c0_seq1	-0.36411	1.59539	0.36438	0.09722	2.22002	0.57949	NA	0.54644	0.80779	2.22002	-2.39983	NA	NA	NA	-1.285	-2.09507
comp112536_c0_seq1	0.35686	NA	1.16274	0.09723	2.00094	-0.87756	-5.06065	-0.7959	-0.98824	2.00094	1.1829	NA	NA	3.60886	-0.6723	1.54039
comp1125373_c0_seq1	0.91822	0.56593	-1.07889	0.18673	-0.31605	-0.53788	NA	0.82289	NA	-0.31605	-1.22758	1.31733	-2.89252	-2.02926	0.31858	3.48332
comp112540_c0_seq1	-0.04961	NA	0.00224	-0.176	-0.03742	-0.31411	-0.6117	1.11927	-1.4485	-0.03742	1.40475	2.22593	-0.57919	-3.05717	NA	-0.92353
comp112541_c0_seq1	-1.07007	NA	0.14015	0.79285	NA	0.95962	0.3616	0.69778	-0.71858	NA	-1.07458	0.47653	-1.40232	-0.30368	1.93247	-2.08468
comp112561_c0_seq1	0.08269	NA	0.5168	1.91902	-2.19887	1.07777	-2.75958	1.26091	-0.47034	-2.19887	-0.57558	NA	-0.7834	0.76961	-1.81547	5.34786
comp112562_c0_seq1	-0.27582	NA	-0.42825	NA	-0.93636	1.17374	-6.55147	-0.45378	NA	-0.93636	NA	NA	NA	NA	NA	-5.38116
comp112574_c0_seq1	-1.03427	0.56593	0.63829	NA	0.92247	-0.60412	-0.61165	-2.83312	NA	0.92247	-0.04174	-7.19882	3.03169	NA	1.50684	-4.53602
comp112578_c0_seq1	-0.6767	0.19625	0.63961	3.78007	-0.20935	2.62527	-4.32179	-0.89624	0.80779	-0.20935	1.89405	NA	-0.18932	0.13585	2.19272	0.11985
comp112579_c0_seq1	0.23721	1.63592	-0.26945	-3.44025	-0.95742	-0.23065	2.51008	-1.83994	1.14001	-0.95742	-0.69966	-0.76389	-2.29233	1.84856	-0.61014	0.13393
comp112595_c0_seq1	0.9201	1.61051	-2.21752	1.80355	0.13083	0.52325	1.28454	0.5703	-0.85791	0.13083	0.50965	-1.37901	-2.89252	-0.5044	NA	1.67798
comp112597_c0_seq1	-0.52205	NA	1.48696	-1.03091	0.61779	-1.62077	1.58921	-0.13094	0.03667	0.61779	-0.995	-3.04976	-0.96041	0.81678	-1.47854	1.1331
comp112602_c0_seq1	-0.09761	1.61051	-0.04806	1.7466	-0.14095	-0.57456	-0.61171	-1.81547	-0.37225	-0.14095	-0.13529	-0.29783	0.72308	-1.69144	-0.57345	0.04631
comp112605_c0_seq1	-0.04169	NA	-1.16318	-3.19438	-1.47612	-1.09933	-0.61169	-0.6205	-0.15399	-1.47612	0.80725	-1.53934	1.93611	0.46672	-0.6723	0.3674
comp112609_c0_seq1	NA	NA	NA	NA	NA	NA	-6.05391	NA	NA	NA	NA	NA	-1.79072	NA	3.41073	NA
comp112614_c0_seq1	-1.19735	NA	NA	-2.22631	1.85428	2.63523	NA	-0.33827	0.41231	1.85428	2.2626	-6.04165	-0.31853	-0.32377	-1.285	-0.33352
comp112625_c0_seq1	-0.36228	NA	2.65071	-4.08867	0.01614	5.7497	-2.75957	-4.22145	8.11228	0.01614	-3.37879	-5.87506	-5.16797	1.67296	NA	-0.33379
comp112632_c0_seq1	1.31034	1.61051	-0.14421	-1.40921	-2.6797	1.1356	-0.61174	-0.2966	-1.13883	-2.6797	-1.20658	1.83451	-2.03911	-1.59321	-0.62936	3.85313
comp112635_c0_seq1	-0.21957	NA	-0.71521	1.70045	0.00143	-0.14044	-0.61172	-0.11855	-0.96221	0.00143	-0.44014	-0.34201	4.75918	-0.5464	-2.17265	0.78048
comp112639_c0_seq1	-0.49334	0.55507	-1.22473	-0.67839	-1.81418	-0.32224	-2.43198	-0.08847	-2.99626	-1.81418	0.62649	-5.28707	0.75915	-3.40222	-0.6723	1.73727
comp1126489_c0_seq1	-0.8231	NA	-0.14796	0.12188	0.96615	-1.28852	NA	0.03933	-0.5481	0.96615	0.49989	NA	0.02775	2.943	-1.285	1.39136
comp112649_c0_seq1	0.25752	NA	-1.79646	-0.73867	NA	-0.52979	2.83093	0.19512	-1.0068	NA	-0.87405	0.82621	NA	0.08338	-0.08545	1.17785
comp112650_c0_seq1	0.05618	NA	0.23373	-1.01483	-0.42052	-0.10593	0.41317	0.45273	-0.25479	-0.42052	0.59418	NA	-0.42407	-1.19724	-2.1232	0.52903
[truncated: 86,490 more rows]

## Sheet: S3
Supplementary Table S3. Distribution of differentially expressed genes (DEGs) within each of the 16 projects. Each line represents one node, representing "TRUE" when differentially expressed, and the sum of Shared Projects for each node.
Node	PRJEB41560	PRJNA182108	PRJNA419791	PRJNA427493	PRJNA549834	PRJNA590281	PRJNA590595	PRJNA598295	PRJNA628529	PRJNA684430	PRJNA776107	PRJNA854329	PRJNA882367	PRJNA885747	PRJNA937025	PRJNA975299	Shared Projects
2.4.1.123	TRUE	TRUE	TRUE	TRUE	TRUE	TRUE	TRUE	TRUE	TRUE	TRUE	TRUE	TRUE	TRUE	TRUE	TRUE	TRUE	16
4.2.3.104	TRUE	TRUE	TRUE	TRUE	TRUE	TRUE	TRUE	TRUE	TRUE	TRUE	TRUE	TRUE	TRUE	TRUE	TRUE	TRUE	16
AT1G07510	TRUE	TRUE	TRUE	TRUE	TRUE	TRUE	TRUE	TRUE	TRUE	TRUE	TRUE	TRUE	TRUE	TRUE	TRUE	TRUE	16
AT5G25940	TRUE	TRUE	TRUE	TRUE	TRUE	TRUE	TRUE	TRUE	TRUE	TRUE	TRUE	TRUE	TRUE	TRUE	TRUE	TRUE	16
1.10.3.3	FALSE	TRUE	TRUE	TRUE	TRUE	TRUE	TRUE	TRUE	TRUE	TRUE	TRUE	TRUE	TRUE	TRUE	TRUE	TRUE	15
1.14.11.13	FALSE	TRUE	TRUE	TRUE	TRUE	TRUE	TRUE	TRUE	TRUE	TRUE	TRUE	TRUE	TRUE	TRUE	TRUE	TRUE	15
1.5.99.12	FALSE	TRUE	TRUE	TRUE	TRUE	TRUE	TRUE	TRUE	TRUE	TRUE	TRUE	TRUE	TRUE	TRUE	TRUE	TRUE	15
2.3.1.133	TRUE	FALSE	TRUE	TRUE	TRUE	TRUE	TRUE	TRUE	TRUE	TRUE	TRUE	TRUE	TRUE	TRUE	TRUE	TRUE	15
2.4.1.82	FALSE	TRUE	TRUE	TRUE	TRUE	TRUE	TRUE	TRUE	TRUE	TRUE	TRUE	TRUE	TRUE	TRUE	TRUE	TRUE	15
2.7.1.11	FALSE	TRUE	TRUE	TRUE	TRUE	TRUE	TRUE	TRUE	TRUE	TRUE	TRUE	TRUE	TRUE	TRUE	TRUE	TRUE	15
3.1.1.5	FALSE	TRUE	TRUE	TRUE	TRUE	TRUE	TRUE	TRUE	TRUE	TRUE	TRUE	TRUE	TRUE	TRUE	TRUE	TRUE	15
ACCO4	FALSE	TRUE	TRUE	TRUE	TRUE	TRUE	TRUE	TRUE	TRUE	TRUE	TRUE	TRUE	TRUE	TRUE	TRUE	TRUE	15
AT1G21280	FALSE	TRUE	TRUE	TRUE	TRUE	TRUE	TRUE	TRUE	TRUE	TRUE	TRUE	TRUE	TRUE	TRUE	TRUE	TRUE	15
AT1G49470	FALSE	TRUE	TRUE	TRUE	TRUE	TRUE	TRUE	TRUE	TRUE	TRUE	TRUE	TRUE	TRUE	TRUE	TRUE	TRUE	15
AT2G25790	FALSE	TRUE	TRUE	TRUE	TRUE	TRUE	TRUE	TRUE	TRUE	TRUE	TRUE	TRUE	TRUE	TRUE	TRUE	TRUE	15
AT2G29120	TRUE	TRUE	TRUE	TRUE	TRUE	TRUE	TRUE	TRUE	TRUE	TRUE	TRUE	TRUE	TRUE	TRUE	TRUE	FALSE	15
AT3G11440	TRUE	FALSE	TRUE	TRUE	TRUE	TRUE	TRUE	TRUE	TRUE	TRUE	TRUE	TRUE	TRUE	TRUE	TRUE	TRUE	15
AT3G11660	FALSE	TRUE	TRUE	TRUE	TRUE	TRUE	TRUE	TRUE	TRUE	TRUE	TRUE	TRUE	TRUE	TRUE	TRUE	TRUE	15
AT3G13065	FALSE	TRUE	TRUE	TRUE	TRUE	TRUE	TRUE	TRUE	TRUE	TRUE	TRUE	TRUE	TRUE	TRUE	TRUE	TRUE	15
AT3G46740	FALSE	TRUE	TRUE	TRUE	TRUE	TRUE	TRUE	TRUE	TRUE	TRUE	TRUE	TRUE	TRUE	TRUE	TRUE	TRUE	15
AT3G47430	FALSE	TRUE	TRUE	TRUE	TRUE	TRUE	TRUE	TRUE	TRUE	TRUE	TRUE	TRUE	TRUE	TRUE	TRUE	TRUE	15
AT3G47580	FALSE	TRUE	TRUE	TRUE	TRUE	TRUE	TRUE	TRUE	TRUE	TRUE	TRUE	TRUE	TRUE	TRUE	TRUE	TRUE	15
AT3G48740	FALSE	TRUE	TRUE	TRUE	TRUE	TRUE	TRUE	TRUE	TRUE	TRUE	TRUE	TRUE	TRUE	TRUE	TRUE	TRUE	15
AT3G50190	FALSE	TRUE	TRUE	TRUE	TRUE	TRUE	TRUE	TRUE	TRUE	TRUE	TRUE	TRUE	TRUE	TRUE	TRUE	TRUE	15
AT4G23150	FALSE	TRUE	TRUE	TRUE	TRUE	TRUE	TRUE	TRUE	TRUE	TRUE	TRUE	TRUE	TRUE	TRUE	TRUE	TRUE	15
AT4G23190	FALSE	TRUE	TRUE	TRUE	TRUE	TRUE	TRUE	TRUE	TRUE	TRUE	TRUE	TRUE	TRUE	TRUE	TRUE	TRUE	15
AT5G24620	FALSE	TRUE	TRUE	TRUE	TRUE	TRUE	TRUE	TRUE	TRUE	TRUE	TRUE	TRUE	TRUE	TRUE	TRUE	TRUE	15
AT5G51940	FALSE	TRUE	TRUE	TRUE	TRUE	TRUE	TRUE	TRUE	TRUE	TRUE	TRUE	TRUE	TRUE	TRUE	TRUE	TRUE	15
CERK1	FALSE	TRUE	TRUE	TRUE	TRUE	TRUE	TRUE	TRUE	TRUE	TRUE	TRUE	TRUE	TRUE	TRUE	TRUE	TRUE	15
CHIC	TRUE	TRUE	TRUE	TRUE	TRUE	TRUE	TRUE	TRUE	TRUE	TRUE	TRUE	TRUE	TRUE	TRUE	TRUE	FALSE	15
EID1	FALSE	TRUE	TRUE	TRUE	TRUE	TRUE	TRUE	TRUE	TRUE	TRUE	TRUE	TRUE	TRUE	TRUE	TRUE	TRUE	15
JAL31	FALSE	TRUE	TRUE	TRUE	TRUE	TRUE	TRUE	TRUE	TRUE	TRUE	TRUE	TRUE	TRUE	TRUE	TRUE	TRUE	15
KCS20	FALSE	TRUE	TRUE	TRUE	TRUE	TRUE	TRUE	TRUE	TRUE	TRUE	TRUE	TRUE	TRUE	TRUE	TRUE	TRUE	15
RPP8	FALSE	TRUE	TRUE	TRUE	TRUE	TRUE	TRUE	TRUE	TRUE	TRUE	TRUE	TRUE	TRUE	TRUE	TRUE	TRUE	15
1.1.1.2	FALSE	TRUE	TRUE	TRUE	TRUE	TRUE	TRUE	TRUE	TRUE	TRUE	TRUE	TRUE	TRUE	FALSE	TRUE	TRUE	14
1.13.11.69	FALSE	FALSE	TRUE	TRUE	TRUE	TRUE	TRUE	TRUE	TRUE	TRUE	TRUE	TRUE	TRUE	TRUE	TRUE	TRUE	14
1.14.14.137	FALSE	TRUE	TRUE	TRUE	TRUE	TRUE	TRUE	TRUE	TRUE	TRUE	TRUE	FALSE	TRUE	TRUE	TRUE	TRUE	14
1.14.15.24	TRUE	TRUE	TRUE	TRUE	TRUE	TRUE	TRUE	FALSE	TRUE	TRUE	TRUE	TRUE	TRUE	TRUE	TRUE	FALSE	14
2.1.1.4	FALSE	FALSE	TRUE	TRUE	TRUE	TRUE	TRUE	TRUE	TRUE	TRUE	TRUE	TRUE	TRUE	TRUE	TRUE	TRUE	14
2.1.1.68	FALSE	FALSE	TRUE	TRUE	TRUE	TRUE	TRUE	TRUE	TRUE	TRUE	TRUE	TRUE	TRUE	TRUE	TRUE	TRUE	14
2.3.1.15	FALSE	TRUE	TRUE	TRUE	TRUE	TRUE	TRUE	TRUE	TRUE	TRUE	TRUE	TRUE	TRUE	TRUE	TRUE	FALSE	14
2.3.1.20	FALSE	TRUE	TRUE	TRUE	TRUE	TRUE	TRUE	TRUE	TRUE	TRUE	TRUE	TRUE	TRUE	TRUE	TRUE	FALSE	14
2.4.1.21	FALSE	TRUE	TRUE	TRUE	TRUE	TRUE	TRUE	TRUE	TRUE	TRUE	TRUE	TRUE	TRUE	FALSE	TRUE	TRUE	14
2.4.1.91	FALSE	TRUE	TRUE	TRUE	TRUE	TRUE	TRUE	FALSE	TRUE	TRUE	TRUE	TRUE	TRUE	TRUE	TRUE	TRUE	14
3.1.4.46	FALSE	FALSE	TRUE	TRUE	TRUE	TRUE	TRUE	TRUE	TRUE	TRUE	TRUE	TRUE	TRUE	TRUE	TRUE	TRUE	14
3.5.1.49	FALSE	TRUE	TRUE	TRUE	TRUE	TRUE	TRUE	TRUE	TRUE	TRUE	TRUE	TRUE	TRUE	TRUE	TRUE	FALSE	14
5.4.2.12	FALSE	FALSE	TRUE	TRUE	TRUE	TRUE	TRUE	TRUE	TRUE	TRUE	TRUE	TRUE	TRUE	TRUE	TRUE	TRUE	14
5.4.99.8	FALSE	FALSE	TRUE	TRUE	TRUE	TRUE	TRUE	TRUE	TRUE	TRUE	TRUE	TRUE	TRUE	TRUE	TRUE	TRUE	14
5.5.1.13	FALSE	TRUE	TRUE	TRUE	TRUE	TRUE	TRUE	TRUE	TRUE	TRUE	TRUE	TRUE	TRUE	TRUE	TRUE	FALSE	14
AOX1A	FALSE	FALSE	TRUE	TRUE	TRUE	TRUE	TRUE	TRUE	TRUE	TRUE	TRUE	TRUE	TRUE	TRUE	TRUE	TRUE	14
APX1	FALSE	FALSE	TRUE	TRUE	TRUE	TRUE	TRUE	TRUE	TRUE	TRUE	TRUE	TRUE	TRUE	TRUE	TRUE	TRUE	14
AT1G01820	FALSE	FALSE	TRUE	TRUE	TRUE	TRUE	TRUE	TRUE	TRUE	TRUE	TRUE	TRUE	TRUE	TRUE	TRUE	TRUE	14
AT1G05600	FALSE	TRUE	TRUE	TRUE	TRUE	TRUE	TRUE	FALSE	TRUE	TRUE	TRUE	TRUE	TRUE	TRUE	TRUE	TRUE	14
AT1G11310	FALSE	TRUE	TRUE	TRUE	TRUE	TRUE	TRUE	TRUE	TRUE	TRUE	TRUE	TRUE	TRUE	TRUE	TRUE	FALSE	14
AT1G11380	FALSE	TRUE	TRUE	TRUE	TRUE	TRUE	TRUE	TRUE	TRUE	TRUE	TRUE	TRUE	FALSE	TRUE	TRUE	TRUE	14
AT1G48630	FALSE	TRUE	TRUE	TRUE	TRUE	TRUE	TRUE	TRUE	TRUE	TRUE	TRUE	TRUE	TRUE	TRUE	TRUE	FALSE	14
AT1G56050	FALSE	TRUE	TRUE	TRUE	TRUE	TRUE	TRUE	TRUE	TRUE	TRUE	TRUE	TRUE	TRUE	FALSE	TRUE	TRUE	14
AT1G62260	TRUE	TRUE	TRUE	TRUE	TRUE	TRUE	TRUE	FALSE	TRUE	TRUE	TRUE	TRUE	FALSE	TRUE	TRUE	TRUE	14
AT1G65800	FALSE	FALSE	TRUE	TRUE	TRUE	TRUE	TRUE	TRUE	TRUE	TRUE	TRUE	TRUE	TRUE	TRUE	TRUE	TRUE	14
AT1G70590	FALSE	FALSE	TRUE	TRUE	TRUE	TRUE	TRUE	TRUE	TRUE	TRUE	TRUE	TRUE	TRUE	TRUE	TRUE	TRUE	14
AT2G02060	FALSE	TRUE	TRUE	TRUE	TRUE	TRUE	TRUE	TRUE	TRUE	TRUE	TRUE	TRUE	TRUE	TRUE	TRUE	FALSE	14
AT2G16130	FALSE	FALSE	TRUE	TRUE	TRUE	TRUE	TRUE	TRUE	TRUE	TRUE	TRUE	TRUE	TRUE	TRUE	TRUE	TRUE	14
AT2G19170	FALSE	FALSE	TRUE	TRUE	TRUE	TRUE	TRUE	TRUE	TRUE	TRUE	TRUE	TRUE	TRUE	TRUE	TRUE	TRUE	14
AT2G24170	FALSE	TRUE	TRUE	TRUE	TRUE	TRUE	TRUE	TRUE	TRUE	TRUE	TRUE	TRUE	TRUE	TRUE	TRUE	FALSE	14
AT2G29390	TRUE	FALSE	TRUE	TRUE	TRUE	TRUE	TRUE	TRUE	TRUE	TRUE	TRUE	TRUE	TRUE	FALSE	TRUE	TRUE	14
AT2G31800	TRUE	FALSE	TRUE	TRUE	TRUE	TRUE	TRUE	FALSE	TRUE	TRUE	TRUE	TRUE	TRUE	TRUE	TRUE	TRUE	14
AT2G33550	FALSE	TRUE	TRUE	TRUE	TRUE	TRUE	TRUE	TRUE	TRUE	TRUE	TRUE	TRUE	TRUE	TRUE	TRUE	FALSE	14
AT2G39090	FALSE	FALSE	TRUE	TRUE	TRUE	TRUE	TRUE	TRUE	TRUE	TRUE	TRUE	TRUE	TRUE	TRUE	TRUE	TRUE	14
AT2G41140	FALSE	TRUE	TRUE	TRUE	TRUE	TRUE	TRUE	TRUE	TRUE	TRUE	TRUE	FALSE	TRUE	TRUE	TRUE	TRUE	14
AT2G45980	FALSE	TRUE	TRUE	TRUE	TRUE	TRUE	TRUE	TRUE	TRUE	TRUE	TRUE	TRUE	FALSE	TRUE	TRUE	TRUE	14
AT2G46400	FALSE	TRUE	TRUE	TRUE	TRUE	TRUE	TRUE	TRUE	TRUE	TRUE	TRUE	TRUE	TRUE	FALSE	TRUE	TRUE	14
AT2G46690	TRUE	FALSE	TRUE	TRUE	TRUE	TRUE	TRUE	TRUE	TRUE	TRUE	TRUE	TRUE	TRUE	TRUE	TRUE	FALSE	14
AT3G21810	FALSE	FALSE	TRUE	TRUE	TRUE	TRUE	TRUE	TRUE	TRUE	TRUE	TRUE	TRUE	TRUE	TRUE	TRUE	TRUE	14
AT3G47110	FALSE	FALSE	TRUE	TRUE	TRUE	TRUE	TRUE	TRUE	TRUE	TRUE	TRUE	TRUE	TRUE	TRUE	TRUE	TRUE	14
AT3G56900	FALSE	TRUE	TRUE	TRUE	TRUE	TRUE	TRUE	TRUE	TRUE	TRUE	TRUE	TRUE	TRUE	TRUE	TRUE	FALSE	14
AT3G62030	FALSE	FALSE	TRUE	TRUE	TRUE	TRUE	TRUE	TRUE	TRUE	TRUE	TRUE	TRUE	TRUE	TRUE	TRUE	TRUE	14
AT4G10920	FALSE	FALSE	TRUE	TRUE	TRUE	TRUE	TRUE	TRUE	TRUE	TRUE	TRUE	TRUE	TRUE	TRUE	TRUE	TRUE	14
AT4G21390	FALSE	TRUE	TRUE	TRUE	TRUE	TRUE	TRUE	TRUE	TRUE	TRUE	TRUE	TRUE	TRUE	TRUE	TRUE	FALSE	14
AT4G21410	FALSE	FALSE	TRUE	TRUE	TRUE	TRUE	TRUE	TRUE	TRUE	TRUE	TRUE	TRUE	TRUE	TRUE	TRUE	TRUE	14
AT4G21450	FALSE	TRUE	TRUE	TRUE	TRUE	TRUE	TRUE	TRUE	TRUE	TRUE	TRUE	TRUE	TRUE	TRUE	TRUE	FALSE	14
AT4G22890	TRUE	FALSE	TRUE	TRUE	TRUE	TRUE	TRUE	TRUE	TRUE	TRUE	TRUE	FALSE	TRUE	TRUE	TRUE	TRUE	14
AT4G23180	FALSE	FALSE	TRUE	TRUE	TRUE	TRUE	TRUE	TRUE	TRUE	TRUE	TRUE	TRUE	TRUE	TRUE	TRUE	TRUE	14
AT4G28830	FALSE	TRUE	TRUE	TRUE	TRUE	TRUE	TRUE	TRUE	TRUE	TRUE	TRUE	TRUE	TRUE	TRUE	TRUE	FALSE	14
AT5G10350	FALSE	FALSE	TRUE	TRUE	TRUE	TRUE	TRUE	TRUE	TRUE	TRUE	TRUE	TRUE	TRUE	TRUE	TRUE	TRUE	14
AT5G43500	TRUE	FALSE	TRUE	TRUE	TRUE	TRUE	TRUE	TRUE	TRUE	TRUE	TRUE	TRUE	TRUE	FALSE	TRUE	TRUE	14
AT5G52430	FALSE	TRUE	TRUE	TRUE	TRUE	TRUE	TRUE	TRUE	TRUE	TRUE	TRUE	TRUE	TRUE	FALSE	TRUE	TRUE	14
AT5G55640	FALSE	TRUE	TRUE	TRUE	TRUE	FALSE	TRUE	TRUE	TRUE	TRUE	TRUE	TRUE	TRUE	TRUE	TRUE	TRUE	14
AT5G56860	FALSE	TRUE	TRUE	TRUE	TRUE	TRUE	TRUE	TRUE	TRUE	TRUE	TRUE	TRUE	TRUE	TRUE	TRUE	FALSE	14
AT5G57120	FALSE	FALSE	TRUE	TRUE	TRUE	TRUE	TRUE	TRUE	TRUE	TRUE	TRUE	TRUE	TRUE	TRUE	TRUE	TRUE	14
AT5G60930	FALSE	FALSE	TRUE	TRUE	TRUE	TRUE	TRUE	TRUE	TRUE	TRUE	TRUE	TRUE	TRUE	TRUE	TRUE	TRUE	14
AT5G61330	FALSE	TRUE	TRUE	TRUE	TRUE	TRUE	TRUE	TRUE	TRUE	TRUE	TRUE	TRUE	FALSE	TRUE	TRUE	TRUE	14
AT5G62930	FALSE	FALSE	TRUE	TRUE	TRUE	TRUE	TRUE	TRUE	TRUE	TRUE	TRUE	TRUE	TRUE	TRUE	TRUE	TRUE	14
BAGP1	TRUE	TRUE	TRUE	TRUE	TRUE	TRUE	TRUE	TRUE	TRUE	TRUE	FALSE	TRUE	TRUE	FALSE	TRUE	TRUE	14
BBX19	FALSE	TRUE	TRUE	TRUE	TRUE	TRUE	TRUE	TRUE	TRUE	TRUE	TRUE	TRUE	TRUE	TRUE	TRUE	FALSE	14
BCHA1	FALSE	TRUE	TRUE	TRUE	TRUE	TRUE	TRUE	TRUE	TRUE	TRUE	TRUE	TRUE	TRUE	TRUE	TRUE	FALSE	14
BGL42	FALSE	TRUE	TRUE	TRUE	TRUE	TRUE	TRUE	FALSE	TRUE	TRUE	TRUE	TRUE	TRUE	TRUE	TRUE	TRUE	14
BIK1	FALSE	FALSE	TRUE	TRUE	TRUE	TRUE	TRUE	TRUE	TRUE	TRUE	TRUE	TRUE	TRUE	TRUE	TRUE	TRUE	14
CHI5	FALSE	TRUE	TRUE	TRUE	TRUE	TRUE	TRUE	TRUE	TRUE	TRUE	TRUE	TRUE	TRUE	FALSE	TRUE	TRUE	14
CHIA	FALSE	FALSE	TRUE	TRUE	TRUE	TRUE	TRUE	TRUE	TRUE	TRUE	TRUE	TRUE	TRUE	TRUE	TRUE	TRUE	14
FLZ10	FALSE	TRUE	TRUE	TRUE	TRUE	TRUE	TRUE	TRUE	TRUE	TRUE	TRUE	TRUE	TRUE	TRUE	TRUE	FALSE	14
GRF1	FALSE	TRUE	TRUE	TRUE	TRUE	TRUE	TRUE	TRUE	TRUE	TRUE	TRUE	TRUE	TRUE	TRUE	TRUE	FALSE	14
GTG1	FALSE	TRUE	TRUE	TRUE	TRUE	TRUE	TRUE	FALSE	TRUE	TRUE	TRUE	TRUE	TRUE	TRUE	TRUE	TRUE	14
IAA2	FALSE	TRUE	TRUE	TRUE	TRUE	TRUE	TRUE	FALSE	TRUE	TRUE	TRUE	TRUE	TRUE	TRUE	TRUE	TRUE	14
IAA27	FALSE	TRUE	TRUE	TRUE	TRUE	TRUE	TRUE	TRUE	TRUE	TRUE	TRUE	TRUE	TRUE	TRUE	TRUE	FALSE	14
IAA31	FALSE	FALSE	TRUE	TRUE	TRUE	TRUE	TRUE	TRUE	TRUE	TRUE	TRUE	TRUE	TRUE	TRUE	TRUE	TRUE	14
INO2	FALSE	TRUE	TRUE	TRUE	TRUE	TRUE	TRUE	TRUE	TRUE	TRUE	TRUE	TRUE	TRUE	TRUE	TRUE	FALSE	14
LRK42	FALSE	FALSE	TRUE	TRUE	TRUE	TRUE	TRUE	TRUE	TRUE	TRUE	TRUE	TRUE	TRUE	TRUE	TRUE	TRUE	14
LRK43	FALSE	FALSE	TRUE	TRUE	TRUE	TRUE	TRUE	TRUE	TRUE	TRUE	TRUE	TRUE	TRUE	TRUE	TRUE	TRUE	14
LRL13	FALSE	TRUE	TRUE	TRUE	TRUE	TRUE	TRUE	TRUE	TRUE	TRUE	TRUE	TRUE	TRUE	TRUE	TRUE	FALSE	14
NCER1	TRUE	FALSE	TRUE	TRUE	TRUE	TRUE	FALSE	TRUE	TRUE	TRUE	TRUE	TRUE	TRUE	TRUE	TRUE	TRUE	14
PEX14	FALSE	FALSE	TRUE	TRUE	TRUE	TRUE	TRUE	TRUE	TRUE	TRUE	TRUE	TRUE	TRUE	TRUE	TRUE	TRUE	14
PHO1	FALSE	TRUE	TRUE	TRUE	TRUE	TRUE	TRUE	FALSE	TRUE	TRUE	TRUE	TRUE	TRUE	TRUE	TRUE	TRUE	14
PSYR1	FALSE	TRUE	TRUE	TRUE	TRUE	TRUE	TRUE	TRUE	TRUE	TRUE	TRUE	TRUE	TRUE	TRUE	TRUE	FALSE	14
PXL1	FALSE	TRUE	TRUE	TRUE	TRUE	TRUE	TRUE	TRUE	TRUE	TRUE	TRUE	TRUE	TRUE	TRUE	TRUE	FALSE	14
RAA1C	FALSE	TRUE	TRUE	TRUE	TRUE	TRUE	TRUE	TRUE	TRUE	TRUE	TRUE	TRUE	TRUE	FALSE	TRUE	TRUE	14
RLK5	FALSE	FALSE	TRUE	TRUE	TRUE	TRUE	TRUE	TRUE	TRUE	TRUE	TRUE	TRUE	TRUE	TRUE	TRUE	TRUE	14
SRF7	FALSE	TRUE	TRUE	TRUE	TRUE	TRUE	TRUE	TRUE	TRUE	TRUE	TRUE	TRUE	TRUE	TRUE	TRUE	FALSE	14
SRFR1	FALSE	TRUE	TRUE	TRUE	TRUE	TRUE	TRUE	TRUE	TRUE	TRUE	TRUE	TRUE	TRUE	TRUE	TRUE	FALSE	14
SRK2E	FALSE	TRUE	TRUE	TRUE	TRUE	TRUE	TRUE	FALSE	TRUE	TRUE	TRUE	TRUE	TRUE	TRUE	TRUE	TRUE	14
TI10B	FALSE	TRUE	TRUE	TRUE	TRUE	TRUE	TRUE	TRUE	TRUE	TRUE	TRUE	TRUE	TRUE	TRUE	TRUE	FALSE	14
TRE1	FALSE	TRUE	TRUE	TRUE	TRUE	TRUE	TRUE	TRUE	TRUE	TRUE	TRUE	TRUE	TRUE	TRUE	TRUE	FALSE	14
1.14.14.82	FALSE	TRUE	TRUE	TRUE	TRUE	TRUE	TRUE	TRUE	TRUE	TRUE	TRUE	TRUE	TRUE	TRUE	FALSE	FALSE	13
1.2.1.3	FALSE	TRUE	TRUE	TRUE	TRUE	TRUE	TRUE	TRUE	TRUE	TRUE	TRUE	TRUE	TRUE	FALSE	TRUE	FALSE	13
1.2.1.44	FALSE	FALSE	TRUE	TRUE	TRUE	TRUE	TRUE	TRUE	TRUE	TRUE	TRUE	TRUE	TRUE	TRUE	TRUE	FALSE	13
2.1.1.12	FALSE	TRUE	FALSE	TRUE	TRUE	TRUE	TRUE	TRUE	TRUE	TRUE	TRUE	TRUE	TRUE	TRUE	TRUE	FALSE	13
2.3.1.50	FALSE	TRUE	FALSE	TRUE	TRUE	TRUE	TRUE	TRUE	TRUE	TRUE	TRUE	TRUE	TRUE	TRUE	TRUE	FALSE	13
2.3.1.74	FALSE	FALSE	FALSE	TRUE	TRUE	TRUE	TRUE	TRUE	TRUE	TRUE	TRUE	TRUE	TRUE	TRUE	TRUE	TRUE	13
2.4.1.14	FALSE	FALSE	TRUE	TRUE	TRUE	TRUE	TRUE	TRUE	TRUE	TRUE	TRUE	TRUE	TRUE	FALSE	TRUE	TRUE	13
2.6.1.2	FALSE	FALSE	TRUE	TRUE	TRUE	TRUE	TRUE	TRUE	TRUE	TRUE	TRUE	TRUE	TRUE	FALSE	TRUE	TRUE	13
2.7.7.27	FALSE	TRUE	TRUE	TRUE	TRUE	TRUE	TRUE	FALSE	TRUE	TRUE	TRUE	TRUE	TRUE	TRUE	TRUE	FALSE	13
3.1.2.14	FALSE	TRUE	TRUE	TRUE	TRUE	TRUE	TRUE	TRUE	TRUE	TRUE	FALSE	TRUE	TRUE	TRUE	TRUE	FALSE	13
3.1.3.12	FALSE	TRUE	TRUE	TRUE	TRUE	TRUE	TRUE	FALSE	TRUE	TRUE	TRUE	TRUE	FALSE	TRUE	TRUE	TRUE	13
3.1.3.74	FALSE	TRUE	TRUE	TRUE	TRUE	TRUE	TRUE	FALSE	TRUE	TRUE	TRUE	TRUE	TRUE	TRUE	TRUE	FALSE	13
3.2.1.22	FALSE	FALSE	TRUE	TRUE	TRUE	TRUE	TRUE	TRUE	TRUE	TRUE	TRUE	TRUE	TRUE	TRUE	TRUE	FALSE	13
3.2.1.4	FALSE	FALSE	TRUE	TRUE	TRUE	TRUE	TRUE	TRUE	TRUE	TRUE	TRUE	TRUE	FALSE	TRUE	TRUE	TRUE	13
3.6.1.12	FALSE	TRUE	TRUE	TRUE	TRUE	TRUE	TRUE	TRUE	TRUE	TRUE	TRUE	TRUE	TRUE	FALSE	TRUE	FALSE	13
5.1.3.2	FALSE	TRUE	TRUE	TRUE	TRUE	TRUE	TRUE	FALSE	TRUE	TRUE	TRUE	TRUE	TRUE	TRUE	TRUE	FALSE	13
6.2.1.12	FALSE	FALSE	TRUE	TRUE	TRUE	TRUE	TRUE	TRUE	TRUE	TRUE	TRUE	TRUE	TRUE	TRUE	FALSE	TRUE	13
AB40G	FALSE	FALSE	TRUE	TRUE	TRUE	TRUE	TRUE	TRUE	TRUE	TRUE	TRUE	TRUE	TRUE	TRUE	TRUE	FALSE	13
ADH1	FALSE	FALSE	TRUE	TRUE	TRUE	TRUE	TRUE	TRUE	TRUE	TRUE	TRUE	TRUE	TRUE	FALSE	TRUE	TRUE	13
APF1	FALSE	FALSE	TRUE	TRUE	TRUE	TRUE	TRUE	TRUE	TRUE	TRUE	TRUE	TRUE	TRUE	TRUE	TRUE	FALSE	13
AT1G01470	FALSE	TRUE	TRUE	TRUE	TRUE	TRUE	TRUE	TRUE	TRUE	TRUE	FALSE	TRUE	TRUE	TRUE	TRUE	FALSE	13
AT1G02680	FALSE	TRUE	TRUE	TRUE	TRUE	TRUE	FALSE	TRUE	TRUE	TRUE	TRUE	TRUE	TRUE	TRUE	TRUE	FALSE	13
AT1G05710	FALSE	FALSE	TRUE	TRUE	TRUE	TRUE	TRUE	TRUE	TRUE	TRUE	TRUE	TRUE	TRUE	TRUE	TRUE	FALSE	13
AT1G06950	FALSE	TRUE	TRUE	TRUE	TRUE	TRUE	TRUE	TRUE	TRUE	TRUE	TRUE	TRUE	FALSE	TRUE	TRUE	FALSE	13
AT1G11430	FALSE	TRUE	TRUE	TRUE	TRUE	TRUE	TRUE	FALSE	TRUE	TRUE	TRUE	TRUE	FALSE	TRUE	TRUE	TRUE	13
AT1G13030	FALSE	FALSE	TRUE	TRUE	TRUE	TRUE	TRUE	TRUE	TRUE	TRUE	TRUE	TRUE	TRUE	TRUE	TRUE	FALSE	13
AT1G14620	FALSE	FALSE	TRUE	TRUE	TRUE	TRUE	TRUE	TRUE	TRUE	TRUE	TRUE	TRUE	TRUE	TRUE	TRUE	FALSE	13
AT1G17240	FALSE	TRUE	TRUE	TRUE	TRUE	TRUE	TRUE	FALSE	TRUE	TRUE	TRUE	TRUE	TRUE	TRUE	TRUE	FALSE	13
AT1G28420	FALSE	TRUE	TRUE	TRUE	TRUE	TRUE	TRUE	TRUE	TRUE	TRUE	TRUE	TRUE	FALSE	TRUE	TRUE	FALSE	13
AT1G45976	FALSE	TRUE	TRUE	TRUE	TRUE	TRUE	TRUE	TRUE	TRUE	TRUE	TRUE	TRUE	TRUE	FALSE	TRUE	FALSE	13
AT1G48370	FALSE	FALSE	TRUE	TRUE	TRUE	TRUE	TRUE	TRUE	TRUE	TRUE	TRUE	TRUE	FALSE	TRUE	TRUE	TRUE	13
AT1G55270	FALSE	FALSE	TRUE	TRUE	TRUE	TRUE	TRUE	TRUE	TRUE	TRUE	TRUE	TRUE	FALSE	TRUE	TRUE	TRUE	13
AT1G59520	FALSE	TRUE	TRUE	TRUE	TRUE	TRUE	TRUE	TRUE	TRUE	TRUE	TRUE	TRUE	TRUE	FALSE	TRUE	FALSE	13
AT1G65480	FALSE	TRUE	TRUE	TRUE	TRUE	TRUE	TRUE	TRUE	TRUE	TRUE	TRUE	TRUE	FALSE	TRUE	TRUE	FALSE	13
AT1G68310	FALSE	TRUE	TRUE	TRUE	TRUE	TRUE	TRUE	FALSE	TRUE	TRUE	TRUE	TRUE	TRUE	TRUE	TRUE	FALSE	13
AT1G69040	FALSE	TRUE	TRUE	TRUE	TRUE	TRUE	TRUE	FALSE	TRUE	TRUE	TRUE	TRUE	TRUE	TRUE	TRUE	FALSE	13
AT1G78080	FALSE	TRUE	TRUE	TRUE	TRUE	TRUE	TRUE	FALSE	TRUE	TRUE	TRUE	TRUE	TRUE	TRUE	TRUE	FALSE	13
AT1G79670	FALSE	TRUE	TRUE	TRUE	TRUE	TRUE	TRUE	TRUE	TRUE	TRUE	TRUE	TRUE	TRUE	FALSE	TRUE	FALSE	13
AT2G32020	FALSE	TRUE	TRUE	TRUE	TRUE	TRUE	TRUE	TRUE	TRUE	TRUE	TRUE	FALSE	TRUE	TRUE	TRUE	FALSE	13
AT2G33700	FALSE	TRUE	TRUE	TRUE	TRUE	TRUE	TRUE	TRUE	TRUE	TRUE	TRUE	TRUE	TRUE	TRUE	FALSE	FALSE	13
AT2G38300	FALSE	TRUE	TRUE	TRUE	TRUE	TRUE	TRUE	FALSE	TRUE	TRUE	TRUE	TRUE	FALSE	TRUE	TRUE	TRUE	13
AT2G45580	FALSE	TRUE	TRUE	TRUE	TRUE	TRUE	TRUE	FALSE	TRUE	TRUE	TRUE	TRUE	TRUE	TRUE	TRUE	FALSE	13
AT3G04380	FALSE	TRUE	TRUE	TRUE	TRUE	TRUE	FALSE	TRUE	TRUE	TRUE	TRUE	TRUE	TRUE	TRUE	FALSE	TRUE	13
AT3G04720	FALSE	TRUE	TRUE	TRUE	TRUE	TRUE	TRUE	FALSE	TRUE	TRUE	TRUE	TRUE	FALSE	TRUE	TRUE	TRUE	13
AT3G13770	FALSE	FALSE	TRUE	TRUE	TRUE	TRUE	TRUE	TRUE	TRUE	TRUE	TRUE	TRUE	TRUE	TRUE	TRUE	FALSE	13
AT3G16370	FALSE	TRUE	TRUE	TRUE	TRUE	TRUE	TRUE	TRUE	TRUE	TRUE	TRUE	TRUE	FALSE	TRUE	FALSE	TRUE	13
AT3G16870	FALSE	TRUE	TRUE	TRUE	TRUE	TRUE	TRUE	FALSE	TRUE	TRUE	TRUE	TRUE	FALSE	TRUE	TRUE	TRUE	13
AT3G23610	FALSE	TRUE	TRUE	TRUE	FALSE	TRUE	TRUE	TRUE	TRUE	FALSE	TRUE	TRUE	TRUE	TRUE	TRUE	TRUE	13
AT3G25510	FALSE	TRUE	TRUE	TRUE	TRUE	TRUE	TRUE	FALSE	TRUE	TRUE	TRUE	TRUE	TRUE	TRUE	TRUE	FALSE	13
AT3G28180	FALSE	TRUE	TRUE	TRUE	TRUE	TRUE	TRUE	FALSE	TRUE	TRUE	TRUE	TRUE	TRUE	TRUE	TRUE	FALSE	13
AT3G42640	FALSE	FALSE	TRUE	TRUE	TRUE	TRUE	TRUE	TRUE	FALSE	TRUE	TRUE	TRUE	TRUE	TRUE	TRUE	TRUE	13
AT4G15950	FALSE	TRUE	TRUE	TRUE	TRUE	TRUE	TRUE	TRUE	TRUE	TRUE	TRUE	TRUE	FALSE	TRUE	TRUE	FALSE	13
AT4G20270	FALSE	TRUE	TRUE	TRUE	TRUE	TRUE	TRUE	TRUE	TRUE	TRUE	TRUE	TRUE	FALSE	TRUE	TRUE	FALSE	13
AT4G22220	FALSE	FALSE	TRUE	TRUE	TRUE	TRUE	TRUE	TRUE	TRUE	TRUE	TRUE	TRUE	TRUE	TRUE	TRUE	FALSE	13
AT5G09820	TRUE	TRUE	TRUE	TRUE	TRUE	TRUE	TRUE	FALSE	TRUE	TRUE	TRUE	TRUE	FALSE	TRUE	TRUE	FALSE	13
AT5G14170	FALSE	TRUE	TRUE	TRUE	TRUE	TRUE	TRUE	FALSE	TRUE	TRUE	TRUE	TRUE	TRUE	TRUE	TRUE	FALSE	13
AT5G15330	TRUE	TRUE	TRUE	TRUE	TRUE	TRUE	TRUE	FALSE	TRUE	TRUE	TRUE	TRUE	FALSE	TRUE	TRUE	FALSE	13
AT5G17550	FALSE	TRUE	TRUE	TRUE	TRUE	TRUE	TRUE	FALSE	TRUE	TRUE	TRUE	TRUE	FALSE	TRUE	TRUE	TRUE	13
AT5G20890	FALSE	TRUE	FALSE	TRUE	TRUE	TRUE	TRUE	TRUE	TRUE	TRUE	TRUE	TRUE	TRUE	TRUE	TRUE	FALSE	13
AT5G24314	FALSE	FALSE	TRUE	TRUE	TRUE	TRUE	TRUE	TRUE	TRUE	TRUE	TRUE	TRUE	TRUE	TRUE	TRUE	FALSE	13
AT5G25590	FALSE	TRUE	TRUE	TRUE	TRUE	TRUE	TRUE	FALSE	TRUE	TRUE	TRUE	TRUE	TRUE	TRUE	TRUE	FALSE	13
AT5G40810	FALSE	FALSE	FALSE	TRUE	TRUE	TRUE	TRUE	TRUE	TRUE	TRUE	TRUE	TRUE	TRUE	TRUE	TRUE	TRUE	13
AT5G42655	FALSE	TRUE	TRUE	TRUE	TRUE	TRUE	TRUE	TRUE	TRUE	TRUE	TRUE	TRUE	FALSE	TRUE	TRUE	FALSE	13
AT5G43070	FALSE	TRUE	TRUE	TRUE	TRUE	TRUE	TRUE	TRUE	TRUE	TRUE	TRUE	TRUE	FALSE	TRUE	TRUE	FALSE	13
AT5G47920	FALSE	FALSE	TRUE	TRUE	TRUE	TRUE	TRUE	TRUE	TRUE	TRUE	TRUE	TRUE	TRUE	TRUE	TRUE	FALSE	13
AT5G49690	FALSE	FALSE	TRUE	TRUE	TRUE	TRUE	TRUE	TRUE	TRUE	TRUE	TRUE	TRUE	TRUE	TRUE	TRUE	FALSE	13
AT5G53390	FALSE	FALSE	TRUE	TRUE	TRUE	TRUE	TRUE	TRUE	TRUE	TRUE	TRUE	TRUE	TRUE	TRUE	TRUE	FALSE	13
AT5G56110	FALSE	TRUE	TRUE	TRUE	TRUE	TRUE	TRUE	TRUE	TRUE	TRUE	TRUE	TRUE	FALSE	TRUE	TRUE	FALSE	13
AT5G57860	FALSE	FALSE	TRUE	TRUE	TRUE	TRUE	TRUE	TRUE	TRUE	TRUE	TRUE	TRUE	TRUE	FALSE	TRUE	TRUE	13
AT5G64560	FALSE	FALSE	TRUE	TRUE	TRUE	TRUE	TRUE	TRUE	TRUE	TRUE	FALSE	TRUE	TRUE	TRUE	TRUE	TRUE	13
BAM1	TRUE	TRUE	TRUE	TRUE	TRUE	TRUE	FALSE	TRUE	TRUE	TRUE	TRUE	FALSE	TRUE	TRUE	FALSE	TRUE	13
CER1	FALSE	FALSE	TRUE	TRUE	TRUE	TRUE	TRUE	TRUE	TRUE	TRUE	FALSE	TRUE	TRUE	TRUE	TRUE	TRUE	13
E13B	FALSE	FALSE	TRUE	TRUE	TRUE	TRUE	TRUE	TRUE	TRUE	TRUE	TRUE	FALSE	TRUE	TRUE	TRUE	TRUE	13
E2FA	FALSE	FALSE	TRUE	TRUE	TRUE	TRUE	TRUE	TRUE	TRUE	TRUE	TRUE	TRUE	TRUE	TRUE	TRUE	FALSE	13
FGT1	FALSE	TRUE	TRUE	TRUE	TRUE	TRUE	TRUE	TRUE	TRUE	TRUE	TRUE	TRUE	FALSE	TRUE	TRUE	FALSE	13
FLZ6	FALSE	FALSE	TRUE	TRUE	TRUE	TRUE	TRUE	TRUE	TRUE	TRUE	TRUE	TRUE	TRUE	TRUE	TRUE	FALSE	13
FRS1	FALSE	TRUE	FALSE	TRUE	TRUE	TRUE	TRUE	TRUE	TRUE	TRUE	TRUE	TRUE	TRUE	TRUE	TRUE	FALSE	13
GLO5	FALSE	TRUE	TRUE	TRUE	TRUE	TRUE	TRUE	FALSE	TRUE	TRUE	TRUE	TRUE	TRUE	TRUE	TRUE	FALSE	13
HSL1	FALSE	FALSE	TRUE	TRUE	TRUE	TRUE	TRUE	TRUE	TRUE	TRUE	TRUE	TRUE	TRUE	TRUE	TRUE	FALSE	13
LOX3	FALSE	TRUE	TRUE	TRUE	TRUE	TRUE	TRUE	TRUE	TRUE	TRUE	FALSE	TRUE	TRUE	TRUE	TRUE	FALSE	13
MBD1	FALSE	TRUE	TRUE	TRUE	TRUE	TRUE	TRUE	FALSE	TRUE	TRUE	TRUE	TRUE	TRUE	TRUE	FALSE	TRUE	13
MIND1	TRUE	FALSE	TRUE	TRUE	FALSE	TRUE	TRUE	TRUE	TRUE	FALSE	TRUE	TRUE	TRUE	TRUE	TRUE	TRUE	13
NIK2	FALSE	FALSE	TRUE	TRUE	TRUE	TRUE	TRUE	TRUE	TRUE	TRUE	TRUE	TRUE	TRUE	TRUE	TRUE	FALSE	13
PCFS4	FALSE	TRUE	TRUE	TRUE	TRUE	TRUE	FALSE	TRUE	TRUE	TRUE	TRUE	TRUE	TRUE	TRUE	TRUE	FALSE	13
PLIP3	FALSE	FALSE	TRUE	TRUE	TRUE	TRUE	TRUE	TRUE	TRUE	TRUE	TRUE	TRUE	TRUE	TRUE	TRUE	FALSE	13
PP2A3	FALSE	FALSE	TRUE	TRUE	TRUE	TRUE	TRUE	TRUE	TRUE	TRUE	TRUE	TRUE	TRUE	TRUE	TRUE	FALSE	13
PSKR1	FALSE	FALSE	TRUE	TRUE	TRUE	TRUE	TRUE	TRUE	TRUE	TRUE	TRUE	FALSE	TRUE	TRUE	TRUE	TRUE	13
PTP1	FALSE	TRUE	TRUE	TRUE	TRUE	TRUE	TRUE	FALSE	TRUE	TRUE	TRUE	TRUE	TRUE	TRUE	TRUE	FALSE	13
SUVH2	FALSE	FALSE	TRUE	TRUE	TRUE	TRUE	TRUE	TRUE	TRUE	TRUE	TRUE	TRUE	TRUE	TRUE	TRUE	FALSE	13
AGO1	FALSE	TRUE	FALSE	TRUE	TRUE	TRUE	TRUE	TRUE	TRUE	TRUE	TRUE	TRUE	FALSE	FALSE	TRUE	TRUE	12
1.1.1.40	FALSE	FALSE	TRUE	TRUE	TRUE	TRUE	TRUE	TRUE	TRUE	TRUE	TRUE	TRUE	TRUE	FALSE	TRUE	FALSE	12
1.14.11.12	FALSE	FALSE	TRUE	TRUE	TRUE	TRUE	FALSE	TRUE	TRUE	TRUE	TRUE	TRUE	TRUE	TRUE	TRUE	FALSE	12
1.14.14.96	FALSE	TRUE	TRUE	TRUE	TRUE	TRUE	TRUE	FALSE	TRUE	TRUE	TRUE	TRUE	FALSE	TRUE	TRUE	FALSE	12
1.14.18.5	FALSE	TRUE	TRUE	TRUE	FALSE	TRUE	TRUE	TRUE	TRUE	FALSE	TRUE	TRUE	TRUE	TRUE	TRUE	FALSE	12
1.2.1.31	FALSE	TRUE	TRUE	TRUE	TRUE	TRUE	TRUE	FALSE	TRUE	TRUE	TRUE	TRUE	TRUE	TRUE	FALSE	FALSE	12
1.2.1.68	FALSE	FALSE	TRUE	TRUE	TRUE	TRUE	TRUE	TRUE	TRUE	TRUE	TRUE	TRUE	TRUE	FALSE	TRUE	FALSE	12
1.2.1.84	FALSE	TRUE	FALSE	FALSE	TRUE	TRUE	TRUE	TRUE	TRUE	TRUE	FALSE	TRUE	TRUE	TRUE	TRUE	TRUE	12
1.3.1.77	FALSE	TRUE	TRUE	TRUE	TRUE	TRUE	TRUE	TRUE	TRUE	TRUE	FALSE	TRUE	TRUE	FALSE	TRUE	FALSE	12
1.3.1.78	FALSE	TRUE	TRUE	TRUE	TRUE	TRUE	TRUE	FALSE	TRUE	TRUE	FALSE	TRUE	TRUE	TRUE	TRUE	FALSE	12
1.4.1.14	FALSE	TRUE	TRUE	TRUE	TRUE	TRUE	FALSE	TRUE	TRUE	TRUE	TRUE	TRUE	TRUE	TRUE	FALSE	FALSE	12
2.1.1.103	FALSE	FALSE	TRUE	TRUE	TRUE	TRUE	TRUE	FALSE	TRUE	TRUE	TRUE	TRUE	TRUE	TRUE	FALSE	TRUE	12
2.1.1.104	FALSE	TRUE	FALSE	TRUE	TRUE	FALSE	TRUE	TRUE	TRUE	TRUE	TRUE	TRUE	FALSE	TRUE	TRUE	TRUE	12
2.1.1.41	FALSE	FALSE	TRUE	TRUE	TRUE	TRUE	TRUE	FALSE	TRUE	TRUE	TRUE	TRUE	TRUE	TRUE	FALSE	TRUE	12
2.2.1.1	FALSE	FALSE	TRUE	TRUE	TRUE	TRUE	TRUE	TRUE	TRUE	TRUE	TRUE	FALSE	TRUE	TRUE	TRUE	FALSE	12
2.3.2.2	FALSE	TRUE	TRUE	FALSE	TRUE	TRUE	TRUE	FALSE	TRUE	TRUE	TRUE	TRUE	TRUE	TRUE	TRUE	FALSE	12
2.4.1.144	FALSE	TRUE	TRUE	FALSE	TRUE	TRUE	TRUE	TRUE	FALSE	TRUE	TRUE	TRUE	TRUE	TRUE	TRUE	FALSE	12
2.4.1.18	FALSE	TRUE	TRUE	TRUE	FALSE	TRUE	TRUE	TRUE	TRUE	FALSE	TRUE	TRUE	TRUE	TRUE	TRUE	FALSE	12
2.4.1.242	FALSE	FALSE	TRUE	TRUE	TRUE	TRUE	TRUE	TRUE	TRUE	TRUE	TRUE	TRUE	FALSE	TRUE	TRUE	FALSE	12
2.4.1.43	FALSE	TRUE	TRUE	TRUE	FALSE	TRUE	TRUE	TRUE	TRUE	FALSE	TRUE	TRUE	TRUE	TRUE	TRUE	FALSE	12
2.4.2.60	FALSE	FALSE	TRUE	TRUE	TRUE	TRUE	TRUE	FALSE	TRUE	TRUE	TRUE	TRUE	FALSE	TRUE	TRUE	TRUE	12
2.6.1.44	FALSE	FALSE	FALSE	TRUE	TRUE	TRUE	TRUE	TRUE	TRUE	TRUE	TRUE	TRUE	TRUE	TRUE	TRUE	FALSE	12
2.6.1.5	FALSE	FALSE	TRUE	TRUE	TRUE	TRUE	TRUE	TRUE	TRUE	TRUE	TRUE	TRUE	FALSE	TRUE	TRUE	FALSE	12
2.6.1.96	FALSE	FALSE	TRUE	TRUE	TRUE	TRUE	TRUE	TRUE	TRUE	TRUE	TRUE	TRUE	TRUE	FALSE	TRUE	FALSE	12
2.7.1.150	FALSE	FALSE	TRUE	TRUE	TRUE	TRUE	TRUE	TRUE	TRUE	TRUE	TRUE	TRUE	TRUE	FALSE	TRUE	FALSE	12
2.7.1.32	FALSE	TRUE	TRUE	TRUE	TRUE	TRUE	TRUE	FALSE	TRUE	TRUE	TRUE	TRUE	TRUE	TRUE	FALSE	FALSE	12
2.7.9.1	FALSE	FALSE	FALSE	FALSE	TRUE	TRUE	TRUE	TRUE	TRUE	TRUE	TRUE	TRUE	TRUE	TRUE	TRUE	TRUE	12
3.1.1.23	FALSE	FALSE	TRUE	TRUE	TRUE	TRUE	TRUE	TRUE	TRUE	TRUE	TRUE	TRUE	FALSE	TRUE	TRUE	FALSE	12
3.1.3.24	FALSE	FALSE	TRUE	TRUE	FALSE	TRUE	TRUE	TRUE	TRUE	FALSE	TRUE	TRUE	TRUE	TRUE	TRUE	TRUE	12
3.1.3.7	FALSE	TRUE	FALSE	TRUE	TRUE	TRUE	TRUE	TRUE	FALSE	TRUE	TRUE	TRUE	TRUE	TRUE	TRUE	FALSE	12
3.2.1.1	FALSE	TRUE	TRUE	TRUE	TRUE	TRUE	TRUE	FALSE	TRUE	TRUE	TRUE	TRUE	FALSE	FALSE	TRUE	TRUE	12
3.2.1.26	FALSE	TRUE	FALSE	TRUE	TRUE	TRUE	TRUE	FALSE	TRUE	TRUE	TRUE	TRUE	TRUE	TRUE	TRUE	FALSE	12
3.2.1.45	FALSE	FALSE	TRUE	TRUE	TRUE	TRUE	TRUE	TRUE	TRUE	TRUE	TRUE	TRUE	FALSE	TRUE	FALSE	TRUE	12
3.2.1.55	FALSE	TRUE	TRUE	TRUE	TRUE	TRUE	TRUE	TRUE	FALSE	TRUE	TRUE	TRUE	FALSE	TRUE	TRUE	FALSE	12
3.2.1.68	FALSE	TRUE	FALSE	TRUE	TRUE	TRUE	TRUE	TRUE	TRUE	TRUE	TRUE	TRUE	FALSE	FALSE	TRUE	TRUE	12
3.5.1.4	FALSE	FALSE	TRUE	TRUE	TRUE	TRUE	TRUE	FALSE	TRUE	TRUE	TRUE	TRUE	TRUE	FALSE	TRUE	TRUE	12
3.6.1.5	FALSE	FALSE	TRUE	TRUE	TRUE	TRUE	TRUE	TRUE	TRUE	TRUE	TRUE	TRUE	TRUE	TRUE	FALSE	FALSE	12
4.1.1.15	FALSE	TRUE	TRUE	TRUE	TRUE	FALSE	TRUE	FALSE	TRUE	TRUE	TRUE	TRUE	TRUE	TRUE	TRUE	FALSE	12
4.1.1.22	FALSE	TRUE	TRUE	TRUE	TRUE	TRUE	TRUE	FALSE	TRUE	TRUE	FALSE	TRUE	TRUE	TRUE	TRUE	FALSE	12
4.1.1.28	FALSE	FALSE	TRUE	TRUE	TRUE	TRUE	FALSE	TRUE	TRUE	TRUE	TRUE	TRUE	TRUE	TRUE	TRUE	FALSE	12
4.1.1.31	FALSE	TRUE	TRUE	TRUE	FALSE	TRUE	TRUE	TRUE	TRUE	FALSE	TRUE	TRUE	TRUE	TRUE	TRUE	FALSE	12
4.1.1.50	FALSE	TRUE	TRUE	TRUE	TRUE	TRUE	TRUE	TRUE	TRUE	TRUE	FALSE	TRUE	FALSE	TRUE	TRUE	FALSE	12
4.2.1.91	FALSE	FALSE	TRUE	FALSE	TRUE	TRUE	TRUE	TRUE	TRUE	TRUE	TRUE	TRUE	TRUE	TRUE	TRUE	FALSE	12
4.2.3.19	FALSE	TRUE	TRUE	TRUE	TRUE	FALSE	TRUE	TRUE	TRUE	TRUE	TRUE	TRUE	TRUE	FALSE	TRUE	FALSE	12
4.2.3.25	FALSE	TRUE	TRUE	TRUE	FALSE	TRUE	TRUE	TRUE	TRUE	FALSE	TRUE	TRUE	TRUE	TRUE	FALSE	TRUE	12
5.4.99.7	FALSE	TRUE	FALSE	TRUE	TRUE	TRUE	TRUE	TRUE	FALSE	TRUE	FALSE	TRUE	TRUE	TRUE	TRUE	TRUE	12
5.5.1.6	FALSE	FALSE	TRUE	TRUE	TRUE	TRUE	TRUE	TRUE	FALSE	TRUE	TRUE	TRUE	TRUE	TRUE	TRUE	FALSE	12
6.3.1.2	FALSE	FALSE	TRUE	TRUE	TRUE	TRUE	TRUE	TRUE	TRUE	TRUE	TRUE	TRUE	FALSE	TRUE	TRUE	FALSE	12
6PGL3	FALSE	TRUE	TRUE	TRUE	FALSE	TRUE	TRUE	TRUE	TRUE	FALSE	TRUE	TRUE	TRUE	TRUE	TRUE	FALSE	12
AGL12	FALSE	FALSE	TRUE	TRUE	TRUE	TRUE	TRUE	TRUE	TRUE	TRUE	TRUE	FALSE	TRUE	TRUE	TRUE	FALSE	12
AT1G05860	FALSE	FALSE	TRUE	TRUE	TRUE	TRUE	TRUE	FALSE	TRUE	TRUE	TRUE	TRUE	TRUE	TRUE	TRUE	FALSE	12
AT1G07270	FALSE	TRUE	TRUE	TRUE	TRUE	TRUE	TRUE	FALSE	FALSE	TRUE	TRUE	TRUE	FALSE	TRUE	TRUE	TRUE	12
AT1G07705	FALSE	TRUE	TRUE	TRUE	TRUE	TRUE	FALSE	TRUE	TRUE	TRUE	TRUE	TRUE	TRUE	FALSE	TRUE	FALSE	12
AT1G09580	FALSE	TRUE	FALSE	TRUE	TRUE	TRUE	TRUE	TRUE	TRUE	TRUE	TRUE	TRUE	FALSE	TRUE	FALSE	TRUE	12
AT1G13630	FALSE	FALSE	TRUE	TRUE	TRUE	TRUE	TRUE	FALSE	TRUE	TRUE	TRUE	TRUE	FALSE	TRUE	TRUE	TRUE	12
AT1G14340	FALSE	FALSE	TRUE	TRUE	TRUE	TRUE	TRUE	TRUE	TRUE	TRUE	TRUE	TRUE	TRUE	TRUE	FALSE	FALSE	12
AT1G17260	TRUE	TRUE	TRUE	TRUE	FALSE	TRUE	TRUE	FALSE	TRUE	FALSE	TRUE	TRUE	TRUE	TRUE	TRUE	FALSE	12
AT1G18260	FALSE	FALSE	TRUE	TRUE	TRUE	TRUE	TRUE	TRUE	TRUE	TRUE	TRUE	TRUE	FALSE	TRUE	FALSE	TRUE	12
AT1G26740	FALSE	TRUE	FALSE	TRUE	TRUE	TRUE	TRUE	TRUE	TRUE	TRUE	TRUE	TRUE	FALSE	TRUE	TRUE	FALSE	12
AT1G27740	FALSE	FALSE	TRUE	TRUE	TRUE	TRUE	TRUE	FALSE	TRUE	TRUE	TRUE	TRUE	TRUE	TRUE	FALSE	TRUE	12
AT1G27750	FALSE	FALSE	TRUE	TRUE	TRUE	TRUE	TRUE	TRUE	TRUE	TRUE	TRUE	TRUE	TRUE	FALSE	TRUE	FALSE	12
AT1G29640	FALSE	FALSE	TRUE	TRUE	TRUE	FALSE	TRUE	TRUE	TRUE	TRUE	TRUE	TRUE	FALSE	TRUE	TRUE	TRUE	12
AT1G29670	FALSE	FALSE	TRUE	TRUE	TRUE	TRUE	TRUE	FALSE	TRUE	TRUE	TRUE	TRUE	TRUE	TRUE	TRUE	FALSE	12
AT1G31360	FALSE	FALSE	TRUE	TRUE	TRUE	TRUE	TRUE	TRUE	FALSE	TRUE	TRUE	TRUE	FALSE	TRUE	TRUE	TRUE	12
AT1G31780	FALSE	TRUE	TRUE	TRUE	TRUE	TRUE	FALSE	TRUE	TRUE	TRUE	TRUE	TRUE	TRUE	TRUE	FALSE	FALSE	12
AT1G36050	FALSE	FALSE	FALSE	TRUE	TRUE	TRUE	TRUE	FALSE	TRUE	TRUE	TRUE	TRUE	TRUE	TRUE	TRUE	TRUE	12
AT1G44800	FALSE	TRUE	TRUE	TRUE	FALSE	TRUE	TRUE	FALSE	TRUE	FALSE	TRUE	TRUE	TRUE	TRUE	TRUE	TRUE	12
AT1G44910	FALSE	TRUE	TRUE	TRUE	TRUE	TRUE	TRUE	FALSE	TRUE	TRUE	TRUE	FALSE	TRUE	TRUE	TRUE	FALSE	12
AT1G61870	FALSE	TRUE	TRUE	TRUE	TRUE	TRUE	TRUE	FALSE	TRUE	TRUE	TRUE	TRUE	TRUE	FALSE	TRUE	FALSE	12
AT1G68400	FALSE	TRUE	TRUE	TRUE	TRUE	TRUE	FALSE	TRUE	TRUE	TRUE	FALSE	TRUE	FALSE	TRUE	TRUE	TRUE	12
AT1G75400	FALSE	TRUE	TRUE	TRUE	TRUE	TRUE	FALSE	TRUE	FALSE	TRUE	TRUE	TRUE	TRUE	FALSE	TRUE	TRUE	12
AT1G75510	TRUE	FALSE	TRUE	TRUE	FALSE	TRUE	TRUE	TRUE	TRUE	FALSE	TRUE	TRUE	TRUE	TRUE	TRUE	FALSE	12
AT1G79010	FALSE	FALSE	TRUE	TRUE	TRUE	FALSE	TRUE	TRUE	TRUE	TRUE	TRUE	TRUE	FALSE	TRUE	TRUE	TRUE	12
AT1G79500	FALSE	TRUE	TRUE	TRUE	TRUE	TRUE	TRUE	TRUE	TRUE	TRUE	TRUE	TRUE	FALSE	TRUE	FALSE	FALSE	12
AT2G02570	FALSE	TRUE	FALSE	TRUE	TRUE	TRUE	TRUE	FALSE	TRUE	TRUE	TRUE	TRUE	TRUE	TRUE	TRUE	FALSE	12
AT2G06010	FALSE	FALSE	TRUE	TRUE	TRUE	TRUE	TRUE	TRUE	TRUE	TRUE	TRUE	TRUE	TRUE	FALSE	TRUE	FALSE	12
AT2G13440	FALSE	TRUE	TRUE	FALSE	TRUE	TRUE	TRUE	FALSE	TRUE	TRUE	TRUE	TRUE	TRUE	FALSE	TRUE	TRUE	12
AT2G16770	FALSE	TRUE	TRUE	TRUE	TRUE	TRUE	TRUE	FALSE	TRUE	TRUE	TRUE	TRUE	FALSE	TRUE	TRUE	FALSE	12
AT2G23300	FALSE	FALSE	TRUE	TRUE	TRUE	TRUE	FALSE	FALSE	TRUE	TRUE	TRUE	TRUE	TRUE	TRUE	TRUE	TRUE	12
AT2G24220	FALSE	TRUE	TRUE	TRUE	TRUE	TRUE	TRUE	TRUE	TRUE	TRUE	TRUE	FALSE	TRUE	TRUE	FALSE	FALSE	12
AT2G30260	FALSE	TRUE	TRUE	TRUE	TRUE	TRUE	TRUE	TRUE	TRUE	TRUE	TRUE	TRUE	FALSE	TRUE	FALSE	FALSE	12
AT2G33793	FALSE	TRUE	TRUE	TRUE	TRUE	TRUE	TRUE	TRUE	TRUE	TRUE	TRUE	TRUE	TRUE	FALSE	FALSE	FALSE	12
AT2G37260	FALSE	TRUE	TRUE	TRUE	TRUE	TRUE	TRUE	FALSE	TRUE	TRUE	TRUE	FALSE	TRUE	TRUE	FALSE	TRUE	12
AT2G37680	FALSE	FALSE	TRUE	TRUE	TRUE	TRUE	TRUE	FALSE	TRUE	TRUE	TRUE	TRUE	FALSE	TRUE	TRUE	TRUE	12
AT2G43000	FALSE	TRUE	TRUE	TRUE	TRUE	TRUE	TRUE	FALSE	TRUE	TRUE	TRUE	TRUE	TRUE	TRUE	FALSE	FALSE	12
AT3G03210	FALSE	FALSE	TRUE	TRUE	FALSE	TRUE	TRUE	TRUE	TRUE	FALSE	TRUE	TRUE	TRUE	TRUE	TRUE	TRUE	12
AT3G15430	FALSE	TRUE	TRUE	TRUE	TRUE	TRUE	TRUE	FALSE	TRUE	TRUE	TRUE	FALSE	TRUE	TRUE	TRUE	FALSE	12
AT3G19300	FALSE	TRUE	TRUE	FALSE	TRUE	TRUE	TRUE	TRUE	TRUE	TRUE	TRUE	TRUE	FALSE	TRUE	TRUE	FALSE	12
AT3G19553	FALSE	TRUE	TRUE	TRUE	FALSE	TRUE	TRUE	TRUE	TRUE	FALSE	TRUE	TRUE	TRUE	TRUE	TRUE	FALSE	12
AT3G20640	FALSE	FALSE	TRUE	TRUE	TRUE	TRUE	TRUE	FALSE	TRUE	TRUE	TRUE	TRUE	TRUE	TRUE	TRUE	FALSE	12
AT3G20860	FALSE	TRUE	FALSE	TRUE	TRUE	TRUE	TRUE	TRUE	FALSE	TRUE	TRUE	TRUE	FALSE	TRUE	TRUE	TRUE	12
AT3G24690	FALSE	TRUE	TRUE	TRUE	TRUE	TRUE	FALSE	FALSE	TRUE	TRUE	TRUE	TRUE	TRUE	TRUE	TRUE	FALSE	12
AT3G25500	FALSE	TRUE	TRUE	TRUE	TRUE	TRUE	FALSE	FALSE	TRUE	TRUE	FALSE	TRUE	TRUE	TRUE	TRUE	TRUE	12
AT3G45870	FALSE	TRUE	TRUE	FALSE	FALSE	TRUE	TRUE	TRUE	TRUE	FALSE	TRUE	TRUE	TRUE	TRUE	TRUE	TRUE	12
AT3G47640	FALSE	TRUE	TRUE	TRUE	TRUE	TRUE	TRUE	FALSE	TRUE	TRUE	TRUE	TRUE	TRUE	FALSE	TRUE	FALSE	12
AT3G48550	FALSE	FALSE	TRUE	TRUE	TRUE	TRUE	TRUE	TRUE	TRUE	TRUE	TRUE	TRUE	TRUE	FALSE	TRUE	FALSE	12
AT3G53630	FALSE	TRUE	TRUE	TRUE	TRUE	TRUE	TRUE	FALSE	TRUE	TRUE	TRUE	FALSE	TRUE	TRUE	TRUE	FALSE	12
AT3G55990	FALSE	FALSE	TRUE	FALSE	TRUE	TRUE	TRUE	FALSE	TRUE	TRUE	TRUE	TRUE	TRUE	TRUE	TRUE	TRUE	12
AT3G61230	FALSE	FALSE	TRUE	TRUE	TRUE	TRUE	TRUE	TRUE	TRUE	TRUE	TRUE	FALSE	TRUE	TRUE	TRUE	FALSE	12
AT3G61760	FALSE	TRUE	TRUE	TRUE	FALSE	TRUE	TRUE	TRUE	TRUE	FALSE	TRUE	TRUE	TRUE	TRUE	TRUE	FALSE	12
AT4G00231	FALSE	TRUE	TRUE	TRUE	TRUE	TRUE	TRUE	FALSE	TRUE	TRUE	TRUE	TRUE	TRUE	FALSE	TRUE	FALSE	12
AT4G02620	FALSE	FALSE	FALSE	TRUE	TRUE	TRUE	TRUE	TRUE	TRUE	TRUE	TRUE	TRUE	FALSE	TRUE	TRUE	TRUE	12
AT4G11190	FALSE	TRUE	TRUE	FALSE	TRUE	TRUE	TRUE	TRUE	TRUE	TRUE	TRUE	TRUE	FALSE	TRUE	TRUE	FALSE	12
AT4G11860	FALSE	TRUE	TRUE	TRUE	TRUE	TRUE	TRUE	TRUE	TRUE	TRUE	TRUE	FALSE	FALSE	TRUE	TRUE	FALSE	12
AT4G12780	FALSE	FALSE	TRUE	TRUE	TRUE	TRUE	TRUE	TRUE	TRUE	TRUE	TRUE	TRUE	FALSE	TRUE	TRUE	FALSE	12
AT4G17170	FALSE	FALSE	FALSE	TRUE	TRUE	TRUE	TRUE	FALSE	TRUE	TRUE	TRUE	TRUE	TRUE	TRUE	TRUE	TRUE	12
AT4G17610	FALSE	TRUE	TRUE	TRUE	TRUE	TRUE	TRUE	FALSE	TRUE	TRUE	TRUE	TRUE	TRUE	FALSE	FALSE	TRUE	12
AT4G18670	FALSE	TRUE	TRUE	TRUE	FALSE	TRUE	TRUE	FALSE	TRUE	FALSE	TRUE	TRUE	TRUE	TRUE	TRUE	TRUE	12
AT4G18950	FALSE	FALSE	TRUE	FALSE	TRUE	TRUE	TRUE	TRUE	TRUE	TRUE	TRUE	TRUE	TRUE	TRUE	FALSE	TRUE	12
AT4G22240	TRUE	FALSE	TRUE	TRUE	TRUE	TRUE	TRUE	TRUE	TRUE	TRUE	TRUE	FALSE	TRUE	FALSE	TRUE	FALSE	12
AT4G23860	FALSE	TRUE	TRUE	TRUE	TRUE	TRUE	TRUE	TRUE	TRUE	TRUE	FALSE	TRUE	TRUE	FALSE	TRUE	FALSE	12
AT4G24090	FALSE	TRUE	FALSE	TRUE	TRUE	TRUE	TRUE	TRUE	TRUE	TRUE	TRUE	TRUE	TRUE	FALSE	TRUE	FALSE	12
AT4G33905	FALSE	FALSE	FALSE	TRUE	TRUE	TRUE	TRUE	FALSE	TRUE	TRUE	TRUE	TRUE	TRUE	TRUE	TRUE	TRUE	12
AT4G34040	FALSE	TRUE	TRUE	TRUE	TRUE	TRUE	TRUE	FALSE	TRUE	TRUE	FALSE	TRUE	TRUE	TRUE	TRUE	FALSE	12
AT5G20490	FALSE	FALSE	TRUE	TRUE	TRUE	TRUE	TRUE	TRUE	TRUE	TRUE	TRUE	TRUE	TRUE	TRUE	FALSE	FALSE	12
AT5G20730	FALSE	TRUE	TRUE	TRUE	TRUE	TRUE	TRUE	FALSE	TRUE	TRUE	TRUE	TRUE	TRUE	FALSE	TRUE	FALSE	12
AT5G21920	FALSE	TRUE	TRUE	FALSE	TRUE	TRUE	TRUE	TRUE	TRUE	TRUE	FALSE	TRUE	TRUE	TRUE	TRUE	FALSE	12
AT5G26360	FALSE	TRUE	TRUE	TRUE	FALSE	TRUE	TRUE	TRUE	TRUE	FALSE	TRUE	TRUE	FALSE	TRUE	TRUE	TRUE	12
AT5G27100	FALSE	FALSE	TRUE	TRUE	TRUE	TRUE	FALSE	TRUE	TRUE	TRUE	TRUE	TRUE	TRUE	TRUE	FALSE	TRUE	12
AT5G40020	FALSE	FALSE	TRUE	TRUE	TRUE	TRUE	TRUE	FALSE	TRUE	TRUE	TRUE	TRUE	TRUE	TRUE	TRUE	FALSE	12
AT5G40450	FALSE	FALSE	TRUE	TRUE	TRUE	TRUE	TRUE	TRUE	TRUE	TRUE	TRUE	FALSE	TRUE	TRUE	TRUE	FALSE	12
AT5G44180	FALSE	FALSE	TRUE	TRUE	TRUE	TRUE	TRUE	TRUE	TRUE	TRUE	TRUE	FALSE	TRUE	TRUE	TRUE	FALSE	12
AT5G45510	FALSE	TRUE	TRUE	TRUE	TRUE	TRUE	TRUE	TRUE	FALSE	TRUE	TRUE	FALSE	TRUE	TRUE	FALSE	TRUE	12
AT5G47690	FALSE	TRUE	TRUE	TRUE	TRUE	FALSE	FALSE	TRUE	TRUE	TRUE	FALSE	TRUE	TRUE	TRUE	TRUE	TRUE	12
AT5G48120	FALSE	FALSE	TRUE	TRUE	TRUE	TRUE	TRUE	FALSE	TRUE	TRUE	TRUE	TRUE	TRUE	TRUE	TRUE	FALSE	12
AT5G48640	FALSE	FALSE	TRUE	TRUE	TRUE	TRUE	TRUE	TRUE	TRUE	TRUE	TRUE	TRUE	FALSE	TRUE	FALSE	TRUE	12
AT5G49760	FALSE	FALSE	FALSE	TRUE	TRUE	TRUE	TRUE	TRUE	TRUE	TRUE	TRUE	TRUE	FALSE	TRUE	TRUE	TRUE	12
AT5G56270	FALSE	FALSE	TRUE	TRUE	TRUE	TRUE	TRUE	TRUE	TRUE	TRUE	TRUE	TRUE	FALSE	TRUE	TRUE	FALSE	12
AT5G58430	FALSE	TRUE	FALSE	TRUE	FALSE	TRUE	TRUE	TRUE	TRUE	FALSE	TRUE	TRUE	TRUE	TRUE	TRUE	TRUE	12
AT5G63200	FALSE	TRUE	FALSE	TRUE	TRUE	TRUE	TRUE	TRUE	TRUE	TRUE	FALSE	TRUE	TRUE	TRUE	TRUE	FALSE	12
AT5G63610	FALSE	FALSE	TRUE	TRUE	TRUE	TRUE	TRUE	TRUE	TRUE	TRUE	TRUE	TRUE	FALSE	TRUE	TRUE	FALSE	12
AT5G64040	FALSE	FALSE	TRUE	TRUE	TRUE	TRUE	TRUE	FALSE	TRUE	TRUE	TRUE	TRUE	FALSE	TRUE	TRUE	TRUE	12
AT5G65660	FALSE	TRUE	TRUE	TRUE	TRUE	TRUE	TRUE	TRUE	TRUE	TRUE	TRUE	TRUE	FALSE	FALSE	TRUE	FALSE	12
AT5G65910	FALSE	TRUE	TRUE	TRUE	TRUE	TRUE	TRUE	TRUE	TRUE	TRUE	TRUE	TRUE	FALSE	FALSE	TRUE	FALSE	12
AT5G67385	FALSE	TRUE	TRUE	TRUE	TRUE	TRUE	TRUE	FALSE	TRUE	TRUE	TRUE	TRUE	FALSE	TRUE	TRUE	FALSE	12
AT5G67420	FALSE	FALSE	TRUE	TRUE	TRUE	TRUE	TRUE	FALSE	TRUE	TRUE	TRUE	TRUE	TRUE	TRUE	TRUE	FALSE	12
AT5G67500	FALSE	FALSE	TRUE	TRUE	TRUE	TRUE	FALSE	FALSE	TRUE	TRUE	TRUE	TRUE	TRUE	TRUE	TRUE	TRUE	12
BAM2	FALSE	FALSE	TRUE	TRUE	TRUE	TRUE	TRUE	TRUE	TRUE	TRUE	TRUE	TRUE	TRUE	FALSE	TRUE	FALSE	12
BPM3	FALSE	TRUE	TRUE	TRUE	FALSE	TRUE	TRUE	TRUE	TRUE	FALSE	TRUE	TRUE	TRUE	TRUE	TRUE	FALSE	12
CDKG1	FALSE	TRUE	TRUE	TRUE	TRUE	TRUE	FALSE	TRUE	TRUE	TRUE	TRUE	TRUE	FALSE	TRUE	TRUE	FALSE	12
CEPR1	FALSE	TRUE	TRUE	TRUE	TRUE	TRUE	TRUE	FALSE	TRUE	TRUE	TRUE	TRUE	TRUE	FALSE	TRUE	FALSE	12
CLV1	FALSE	FALSE	TRUE	TRUE	TRUE	TRUE	TRUE	TRUE	TRUE	TRUE	FALSE	FALSE	TRUE	TRUE	TRUE	TRUE	12
CSN1	FALSE	TRUE	FALSE	TRUE	TRUE	TRUE	TRUE	FALSE	TRUE	TRUE	TRUE	TRUE	TRUE	TRUE	TRUE	FALSE	12
ERL2	FALSE	FALSE	TRUE	TRUE	TRUE	TRUE	TRUE	FALSE	TRUE	TRUE	TRUE	TRUE	TRUE	TRUE	TRUE	FALSE	12
FKB42	FALSE	FALSE	TRUE	TRUE	TRUE	TRUE	TRUE	FALSE	TRUE	TRUE	FALSE	TRUE	TRUE	TRUE	TRUE	TRUE	12
FLS2	FALSE	TRUE	TRUE	TRUE	TRUE	TRUE	TRUE	FALSE	TRUE	TRUE	TRUE	TRUE	FALSE	FALSE	TRUE	TRUE	12
GSO2	FALSE	FALSE	TRUE	TRUE	TRUE	TRUE	TRUE	FALSE	TRUE	TRUE	TRUE	TRUE	TRUE	TRUE	TRUE	FALSE	12
HSPR2	FALSE	FALSE	TRUE	TRUE	TRUE	TRUE	TRUE	TRUE	TRUE	TRUE	TRUE	TRUE	TRUE	FALSE	TRUE	FALSE	12
IAA11	FALSE	FALSE	TRUE	TRUE	TRUE	TRUE	TRUE	TRUE	TRUE	TRUE	TRUE	TRUE	TRUE	FALSE	TRUE	FALSE	12
IPPK	FALSE	FALSE	TRUE	TRUE	TRUE	TRUE	FALSE	TRUE	TRUE	TRUE	TRUE	TRUE	TRUE	FALSE	TRUE	TRUE	12
JAL23	FALSE	FALSE	TRUE	TRUE	TRUE	TRUE	TRUE	TRUE	TRUE	TRUE	TRUE	TRUE	TRUE	TRUE	FALSE	FALSE	12
KASC2	FALSE	TRUE	TRUE	TRUE	TRUE	TRUE	TRUE	FALSE	TRUE	TRUE	TRUE	FALSE	TRUE	TRUE	TRUE	FALSE	12
KAT2	FALSE	FALSE	TRUE	FALSE	TRUE	TRUE	TRUE	TRUE	TRUE	TRUE	TRUE	TRUE	TRUE	TRUE	TRUE	FALSE	12
KU70	FALSE	TRUE	TRUE	TRUE	TRUE	TRUE	TRUE	FALSE	TRUE	TRUE	TRUE	TRUE	FALSE	TRUE	TRUE	FALSE	12
LACS7	FALSE	FALSE	TRUE	TRUE	TRUE	TRUE	TRUE	TRUE	TRUE	TRUE	TRUE	TRUE	TRUE	TRUE	FALSE	FALSE	12
LOX1	FALSE	TRUE	TRUE	TRUE	FALSE	TRUE	TRUE	FALSE	TRUE	FALSE	TRUE	TRUE	TRUE	TRUE	TRUE	TRUE	12
LOX2	FALSE	FALSE	TRUE	TRUE	FALSE	TRUE	TRUE	TRUE	TRUE	FALSE	TRUE	TRUE	TRUE	TRUE	TRUE	TRUE	12
MIK2	FALSE	FALSE	TRUE	TRUE	TRUE	TRUE	FALSE	TRUE	TRUE	TRUE	TRUE	TRUE	TRUE	TRUE	FALSE	TRUE	12
ORC1A	FALSE	TRUE	TRUE	TRUE	FALSE	TRUE	TRUE	TRUE	TRUE	FALSE	TRUE	TRUE	TRUE	TRUE	TRUE	FALSE	12
OXI1	FALSE	FALSE	TRUE	TRUE	TRUE	TRUE	TRUE	TRUE	TRUE	TRUE	TRUE	TRUE	FALSE	TRUE	TRUE	FALSE	12
P2A14	FALSE	FALSE	TRUE	TRUE	TRUE	TRUE	TRUE	FALSE	TRUE	TRUE	TRUE	TRUE	TRUE	TRUE	TRUE	FALSE	12
P2C22	FALSE	FALSE	TRUE	TRUE	TRUE	TRUE	TRUE	TRUE	TRUE	TRUE	TRUE	TRUE	TRUE	FALSE	TRUE	FALSE	12
PAO1	FALSE	FALSE	TRUE	TRUE	TRUE	TRUE	TRUE	TRUE	TRUE	TRUE	TRUE	TRUE	TRUE	TRUE	FALSE	FALSE	12
PCRK1	FALSE	TRUE	TRUE	TRUE	TRUE	TRUE	TRUE	FALSE	TRUE	TRUE	TRUE	TRUE	TRUE	FALSE	TRUE	FALSE	12
PEPR2	FALSE	FALSE	TRUE	TRUE	TRUE	TRUE	TRUE	TRUE	FALSE	TRUE	TRUE	TRUE	TRUE	TRUE	TRUE	FALSE	12
PIF5	FALSE	TRUE	TRUE	TRUE	TRUE	TRUE	TRUE	FALSE	TRUE	TRUE	TRUE	TRUE	TRUE	FALSE	TRUE	FALSE	12
PNP1	FALSE	FALSE	TRUE	TRUE	TRUE	TRUE	TRUE	TRUE	TRUE	TRUE	TRUE	TRUE	FALSE	TRUE	TRUE	FALSE	12
RAR1	FALSE	FALSE	FALSE	TRUE	TRUE	TRUE	TRUE	TRUE	TRUE	TRUE	TRUE	TRUE	FALSE	TRUE	TRUE	TRUE	12
RPM1	FALSE	TRUE	TRUE	TRUE	TRUE	TRUE	TRUE	FALSE	TRUE	TRUE	TRUE	TRUE	TRUE	TRUE	FALSE	FALSE	12
RPS5	FALSE	FALSE	TRUE	TRUE	TRUE	TRUE	TRUE	TRUE	TRUE	TRUE	TRUE	TRUE	FALSE	TRUE	TRUE	FALSE	12
RSH1C	FALSE	FALSE	TRUE	TRUE	TRUE	TRUE	TRUE	FALSE	TRUE	TRUE	TRUE	TRUE	TRUE	FALSE	TRUE	TRUE	12
SDE3	FALSE	FALSE	TRUE	TRUE	FALSE	TRUE	TRUE	TRUE	TRUE	FALSE	TRUE	TRUE	TRUE	TRUE	TRUE	TRUE	12
SLK2	FALSE	TRUE	TRUE	TRUE	FALSE	TRUE	TRUE	TRUE	FALSE	FALSE	TRUE	TRUE	TRUE	TRUE	TRUE	TRUE	12
SR45	FALSE	FALSE	TRUE	TRUE	TRUE	TRUE	TRUE	TRUE	TRUE	TRUE	FALSE	TRUE	TRUE	TRUE	TRUE	FALSE	12
YY1	FALSE	FALSE	TRUE	TRUE	TRUE	TRUE	TRUE	FALSE	TRUE	TRUE	TRUE	TRUE	FALSE	TRUE	TRUE	TRUE	12
AGO10	FALSE	FALSE	TRUE	TRUE	TRUE	TRUE	TRUE	FALSE	FALSE	TRUE	TRUE	TRUE	TRUE	TRUE	TRUE	FALSE	11
1.1.1.205	FALSE	TRUE	TRUE	TRUE	TRUE	TRUE	FALSE	TRUE	TRUE	TRUE	TRUE	TRUE	FALSE	FALSE	TRUE	FALSE	11
1.1.1.354	FALSE	FALSE	TRUE	TRUE	FALSE	TRUE	TRUE	TRUE	TRUE	FALSE	TRUE	TRUE	TRUE	TRUE	FALSE	TRUE	11
1.1.1.95	FALSE	TRUE	TRUE	TRUE	TRUE	TRUE	TRUE	FALSE	TRUE	TRUE	TRUE	TRUE	FALSE	FALSE	TRUE	FALSE	11
1.2.3.7	FALSE	FALSE	TRUE	TRUE	TRUE	TRUE	TRUE	FALSE	TRUE	TRUE	TRUE	FALSE	FALSE	TRUE	TRUE	TRUE	11
1.2.4.4	FALSE	TRUE	TRUE	TRUE	TRUE	TRUE	TRUE	FALSE	TRUE	TRUE	TRUE	TRUE	FALSE	FALSE	TRUE	FALSE	11
1.3.1.9	FALSE	TRUE	FALSE	TRUE	TRUE	TRUE	TRUE	FALSE	TRUE	TRUE	TRUE	TRUE	TRUE	TRUE	FALSE	FALSE	11
1.3.3.3	FALSE	FALSE	TRUE	TRUE	TRUE	TRUE	TRUE	FALSE	TRUE	TRUE	TRUE	TRUE	TRUE	FALSE	TRUE	FALSE	11
1.5.1.8	FALSE	FALSE	TRUE	TRUE	TRUE	TRUE	TRUE	FALSE	TRUE	TRUE	TRUE	FALSE	TRUE	FALSE	TRUE	TRUE	11
1.5.3.17	FALSE	FALSE	FALSE	TRUE	TRUE	TRUE	TRUE	FALSE	TRUE	TRUE	TRUE	TRUE	TRUE	TRUE	TRUE	FALSE	11
1A16	FALSE	TRUE	TRUE	TRUE	TRUE	TRUE	TRUE	FALSE	FALSE	TRUE	TRUE	TRUE	FALSE	TRUE	FALSE	TRUE	11
2.3.1.188	FALSE	FALSE	TRUE	TRUE	FALSE	TRUE	TRUE	TRUE	TRUE	FALSE	TRUE	TRUE	TRUE	TRUE	TRUE	FALSE	11
2.3.1.51	FALSE	TRUE	FALSE	TRUE	TRUE	TRUE	TRUE	FALSE	TRUE	TRUE	TRUE	TRUE	TRUE	FALSE	TRUE	FALSE	11
2.3.3.9	FALSE	FALSE	TRUE	TRUE	TRUE	TRUE	TRUE	FALSE	TRUE	TRUE	TRUE	TRUE	TRUE	FALSE	TRUE	FALSE	11
2.4.1.241	FALSE	TRUE	TRUE	TRUE	FALSE	TRUE	TRUE	TRUE	FALSE	FALSE	TRUE	TRUE	FALSE	TRUE	TRUE	TRUE	11
2.4.1.67	FALSE	TRUE	TRUE	FALSE	TRUE	TRUE	FALSE	TRUE	TRUE	TRUE	TRUE	TRUE	FALSE	TRUE	TRUE	FALSE	11
2.4.2.24	FALSE	FALSE	TRUE	TRUE	FALSE	TRUE	TRUE	TRUE	TRUE	FALSE	TRUE	TRUE	FALSE	TRUE	TRUE	TRUE	11
2.7.1.159	FALSE	FALSE	TRUE	TRUE	FALSE	TRUE	TRUE	TRUE	TRUE	FALSE	TRUE	TRUE	TRUE	TRUE	TRUE	FALSE	11
2.7.1.23	FALSE	FALSE	TRUE	TRUE	TRUE	TRUE	TRUE	TRUE	TRUE	TRUE	FALSE	TRUE	FALSE	TRUE	TRUE	FALSE	11
2.7.1.40	FALSE	TRUE	TRUE	FALSE	FALSE	TRUE	TRUE	TRUE	TRUE	FALSE	TRUE	TRUE	TRUE	TRUE	TRUE	FALSE	11
2.7.1.46	FALSE	TRUE	TRUE	TRUE	FALSE	TRUE	TRUE	TRUE	TRUE	FALSE	TRUE	TRUE	FALSE	TRUE	TRUE	FALSE	11
2.7.1.68	FALSE	TRUE	FALSE	TRUE	TRUE	TRUE	TRUE	FALSE	TRUE	TRUE	TRUE	TRUE	TRUE	FALSE	TRUE	FALSE	11
2.7.1.71	FALSE	FALSE	TRUE	TRUE	TRUE	TRUE	TRUE	FALSE	TRUE	TRUE	FALSE	TRUE	TRUE	TRUE	TRUE	FALSE	11
2.7.1.90	FALSE	TRUE	TRUE	TRUE	FALSE	TRUE	TRUE	TRUE	TRUE	FALSE	TRUE	TRUE	FALSE	TRUE	TRUE	FALSE	11
2.7.2.11	FALSE	FALSE	TRUE	TRUE	TRUE	FALSE	TRUE	TRUE	TRUE	TRUE	FALSE	TRUE	TRUE	TRUE	TRUE	FALSE	11
2.7.4.3	FALSE	FALSE	TRUE	TRUE	TRUE	TRUE	TRUE	FALSE	TRUE	TRUE	TRUE	TRUE	FALSE	TRUE	TRUE	FALSE	11
3.1.3.11	FALSE	TRUE	TRUE	TRUE	TRUE	TRUE	TRUE	FALSE	TRUE	TRUE	TRUE	FALSE	TRUE	FALSE	TRUE	FALSE	11
3.1.3.2	FALSE	FALSE	FALSE	TRUE	TRUE	TRUE	TRUE	TRUE	TRUE	TRUE	TRUE	TRUE	FALSE	TRUE	TRUE	FALSE	11
3.1.3.81	FALSE	FALSE	TRUE	TRUE	FALSE	TRUE	TRUE	FALSE	TRUE	FALSE	TRUE	TRUE	TRUE	TRUE	TRUE	TRUE	11
4.1.1.1	FALSE	TRUE	FALSE	TRUE	TRUE	TRUE	TRUE	FALSE	TRUE	TRUE	TRUE	TRUE	TRUE	FALSE	TRUE	FALSE	11
4.1.2.13	FALSE	FALSE	TRUE	TRUE	TRUE	TRUE	TRUE	FALSE	TRUE	TRUE	TRUE	TRUE	TRUE	FALSE	TRUE	FALSE	11
4.2.3.15	FALSE	FALSE	TRUE	TRUE	TRUE	TRUE	FALSE	FALSE	TRUE	TRUE	TRUE	TRUE	FALSE	TRUE	TRUE	TRUE	11
4.3.1.24	FALSE	FALSE	TRUE	FALSE	TRUE	TRUE	TRUE	TRUE	TRUE	TRUE	FALSE	TRUE	TRUE	TRUE	TRUE	FALSE	11
4.99.1.10	FALSE	FALSE	TRUE	TRUE	TRUE	TRUE	TRUE	TRUE	TRUE	TRUE	TRUE	TRUE	FALSE	TRUE	FALSE	FALSE	11
5.1.3.15	FALSE	FALSE	TRUE	TRUE	TRUE	TRUE	TRUE	TRUE	FALSE	TRUE	FALSE	TRUE	TRUE	TRUE	TRUE	FALSE	11
5.3.1.1	FALSE	TRUE	TRUE	TRUE	TRUE	TRUE	TRUE	FALSE	TRUE	TRUE	TRUE	TRUE	FALSE	FALSE	TRUE	FALSE	11
6.3.4.2	FALSE	FALSE	TRUE	TRUE	TRUE	FALSE	TRUE	FALSE	TRUE	TRUE	TRUE	TRUE	TRUE	TRUE	TRUE	FALSE	11
A70	FALSE	FALSE	TRUE	TRUE	TRUE	TRUE	FALSE	FALSE	TRUE	TRUE	TRUE	TRUE	TRUE	TRUE	FALSE	TRUE	11
AB19B	FALSE	FALSE	TRUE	FALSE	TRUE	TRUE	TRUE	FALSE	TRUE	TRUE	TRUE	TRUE	TRUE	TRUE	TRUE	FALSE	11
ALA1	FALSE	TRUE	FALSE	TRUE	TRUE	TRUE	TRUE	FALSE	TRUE	TRUE	TRUE	TRUE	TRUE	FALSE	TRUE	FALSE	11
AMPD	FALSE	FALSE	TRUE	TRUE	TRUE	TRUE	TRUE	FALSE	TRUE	TRUE	TRUE	TRUE	TRUE	FALSE	TRUE	FALSE	11
APRR5	FALSE	TRUE	TRUE	TRUE	FALSE	FALSE	TRUE	FALSE	TRUE	FALSE	TRUE	TRUE	TRUE	TRUE	TRUE	TRUE	11
ARR9	FALSE	TRUE	TRUE	TRUE	FALSE	TRUE	TRUE	TRUE	TRUE	FALSE	TRUE	FALSE	TRUE	TRUE	FALSE	TRUE	11
AT1G07370	FALSE	TRUE	TRUE	TRUE	TRUE	TRUE	TRUE	TRUE	TRUE	TRUE	FALSE	FALSE	TRUE	TRUE	FALSE	FALSE	11
AT1G07560	FALSE	TRUE	TRUE	TRUE	TRUE	TRUE	TRUE	FALSE	FALSE	TRUE	TRUE	TRUE	FALSE	TRUE	TRUE	FALSE	11
AT1G08060	FALSE	TRUE	TRUE	TRUE	FALSE	TRUE	TRUE	FALSE	TRUE	FALSE	TRUE	FALSE	TRUE	TRUE	TRUE	TRUE	11
AT1G09250	FALSE	FALSE	FALSE	TRUE	TRUE	TRUE	TRUE	TRUE	FALSE	TRUE	TRUE	TRUE	TRUE	TRUE	TRUE	FALSE	11
AT1G10760	FALSE	FALSE	TRUE	TRUE	TRUE	TRUE	FALSE	FALSE	TRUE	TRUE	FALSE	TRUE	TRUE	TRUE	TRUE	TRUE	11
AT1G12030	FALSE	TRUE	TRUE	TRUE	TRUE	FALSE	FALSE	TRUE	TRUE	TRUE	TRUE	FALSE	TRUE	TRUE	TRUE	FALSE	11
AT1G13770	FALSE	FALSE	TRUE	FALSE	TRUE	TRUE	TRUE	FALSE	TRUE	TRUE	TRUE	TRUE	TRUE	TRUE	TRUE	FALSE	11
AT1G14000	FALSE	FALSE	TRUE	TRUE	TRUE	TRUE	TRUE	FALSE	TRUE	TRUE	TRUE	TRUE	TRUE	FALSE	TRUE	FALSE	11
AT1G15820	FALSE	FALSE	FALSE	TRUE	TRUE	TRUE	TRUE	TRUE	TRUE	TRUE	TRUE	TRUE	TRUE	FALSE	TRUE	FALSE	11
AT1G16290	FALSE	TRUE	TRUE	TRUE	FALSE	TRUE	FALSE	TRUE	TRUE	FALSE	TRUE	TRUE	TRUE	TRUE	TRUE	FALSE	11
AT1G22300	FALSE	FALSE	FALSE	TRUE	TRUE	TRUE	TRUE	TRUE	TRUE	TRUE	TRUE	TRUE	FALSE	TRUE	TRUE	FALSE	11
AT1G25280	FALSE	TRUE	TRUE	TRUE	TRUE	TRUE	TRUE	FALSE	TRUE	TRUE	FALSE	TRUE	FALSE	TRUE	TRUE	FALSE	11
AT1G26260	FALSE	FALSE	TRUE	TRUE	TRUE	TRUE	TRUE	FALSE	TRUE	TRUE	TRUE	TRUE	FALSE	TRUE	TRUE	FALSE	11
AT1G27530	FALSE	FALSE	FALSE	TRUE	TRUE	TRUE	TRUE	TRUE	TRUE	TRUE	TRUE	TRUE	TRUE	TRUE	FALSE	FALSE	11
AT1G31120	FALSE	TRUE	TRUE	TRUE	FALSE	TRUE	TRUE	TRUE	TRUE	FALSE	FALSE	TRUE	TRUE	TRUE	TRUE	FALSE	11
AT1G34350	FALSE	TRUE	TRUE	FALSE	TRUE	TRUE	TRUE	TRUE	FALSE	TRUE	TRUE	TRUE	FALSE	TRUE	TRUE	FALSE	11
AT1G52240	FALSE	TRUE	TRUE	TRUE	TRUE	TRUE	TRUE	TRUE	TRUE	TRUE	TRUE	FALSE	FALSE	TRUE	FALSE	FALSE	11
AT1G52380	FALSE	TRUE	TRUE	FALSE	FALSE	TRUE	TRUE	TRUE	TRUE	FALSE	TRUE	TRUE	FALSE	TRUE	TRUE	TRUE	11
AT1G54610	FALSE	TRUE	TRUE	TRUE	FALSE	TRUE	TRUE	TRUE	TRUE	FALSE	TRUE	TRUE	TRUE	FALSE	TRUE	FALSE	11
AT1G56070	FALSE	TRUE	TRUE	TRUE	TRUE	FALSE	TRUE	FALSE	TRUE	TRUE	TRUE	TRUE	TRUE	FALSE	TRUE	FALSE	11
AT1G56590	FALSE	TRUE	TRUE	TRUE	FALSE	TRUE	TRUE	TRUE	TRUE	FALSE	TRUE	TRUE	FALSE	FALSE	TRUE	TRUE	11
AT1G59720	FALSE	TRUE	FALSE	TRUE	TRUE	TRUE	TRUE	TRUE	TRUE	TRUE	FALSE	TRUE	FALSE	FALSE	TRUE	TRUE	11
AT1G59990	FALSE	FALSE	TRUE	TRUE	TRUE	TRUE	TRUE	FALSE	TRUE	TRUE	TRUE	TRUE	TRUE	TRUE	FALSE	FALSE	11
AT1G60780	FALSE	FALSE	TRUE	TRUE	TRUE	TRUE	TRUE	TRUE	TRUE	TRUE	TRUE	FALSE	FALSE	TRUE	TRUE	FALSE	11
AT1G61520	FALSE	FALSE	TRUE	TRUE	FALSE	TRUE	TRUE	TRUE	TRUE	FALSE	TRUE	TRUE	FALSE	TRUE	TRUE	TRUE	11
AT1G62780	FALSE	FALSE	FALSE	TRUE	TRUE	TRUE	TRUE	FALSE	TRUE	TRUE	TRUE	TRUE	TRUE	FALSE	TRUE	TRUE	11
AT1G63650	FALSE	FALSE	TRUE	TRUE	TRUE	TRUE	TRUE	TRUE	TRUE	TRUE	TRUE	TRUE	FALSE	FALSE	TRUE	FALSE	11
AT1G65620	FALSE	FALSE	TRUE	TRUE	TRUE	TRUE	TRUE	TRUE	TRUE	TRUE	TRUE	FALSE	FALSE	TRUE	FALSE	TRUE	11
AT1G68590	FALSE	TRUE	TRUE	TRUE	FALSE	TRUE	TRUE	FALSE	TRUE	FALSE	TRUE	TRUE	TRUE	TRUE	TRUE	FALSE	11
AT1G69340	FALSE	TRUE	TRUE	TRUE	TRUE	TRUE	TRUE	FALSE	TRUE	TRUE	TRUE	TRUE	TRUE	FALSE	FALSE	FALSE	11
AT1G71110	FALSE	FALSE	TRUE	TRUE	TRUE	TRUE	TRUE	FALSE	TRUE	TRUE	TRUE	FALSE	FALSE	TRUE	TRUE	TRUE	11
AT1G76540	FALSE	FALSE	TRUE	TRUE	TRUE	TRUE	TRUE	FALSE	TRUE	TRUE	TRUE	TRUE	FALSE	FALSE	TRUE	TRUE	11
AT1G76900	FALSE	TRUE	TRUE	FALSE	TRUE	TRUE	TRUE	TRUE	TRUE	TRUE	TRUE	TRUE	FALSE	TRUE	FALSE	FALSE	11
AT1G77580	FALSE	FALSE	TRUE	TRUE	TRUE	TRUE	TRUE	FALSE	TRUE	TRUE	TRUE	TRUE	FALSE	TRUE	TRUE	FALSE	11
AT1G80120	FALSE	FALSE	FALSE	TRUE	TRUE	TRUE	TRUE	FALSE	TRUE	TRUE	TRUE	TRUE	TRUE	TRUE	TRUE	FALSE	11
AT1G80840	FALSE	TRUE	TRUE	TRUE	TRUE	TRUE	TRUE	FALSE	TRUE	TRUE	TRUE	TRUE	FALSE	FALSE	TRUE	FALSE	11
AT2G01420	FALSE	TRUE	FALSE	TRUE	TRUE	TRUE	TRUE	FALSE	TRUE	TRUE	TRUE	TRUE	FALSE	TRUE	TRUE	FALSE	11
AT2G02410	FALSE	TRUE	FALSE	TRUE	TRUE	TRUE	TRUE	FALSE	TRUE	TRUE	TRUE	TRUE	TRUE	TRUE	FALSE	FALSE	11
AT2G03070	FALSE	FALSE	TRUE	TRUE	TRUE	FALSE	TRUE	TRUE	TRUE	TRUE	TRUE	TRUE	TRUE	TRUE	FALSE	FALSE	11
AT2G16940	FALSE	FALSE	TRUE	TRUE	TRUE	TRUE	FALSE	TRUE	TRUE	TRUE	TRUE	TRUE	TRUE	FALSE	TRUE	FALSE	11
AT2G19260	FALSE	FALSE	TRUE	TRUE	TRUE	TRUE	FALSE	TRUE	TRUE	TRUE	TRUE	TRUE	FALSE	TRUE	TRUE	FALSE	11
AT2G22770	FALSE	FALSE	FALSE	TRUE	TRUE	TRUE	TRUE	TRUE	TRUE	TRUE	TRUE	TRUE	FALSE	TRUE	TRUE	FALSE	11
AT2G23830	FALSE	TRUE	TRUE	TRUE	FALSE	TRUE	TRUE	TRUE	TRUE	FALSE	TRUE	TRUE	FALSE	TRUE	TRUE	FALSE	11
AT2G26180	FALSE	FALSE	TRUE	TRUE	TRUE	TRUE	TRUE	FALSE	TRUE	TRUE	TRUE	TRUE	TRUE	FALSE	TRUE	FALSE	11
AT2G26590	FALSE	TRUE	TRUE	FALSE	TRUE	TRUE	TRUE	FALSE	TRUE	TRUE	TRUE	TRUE	TRUE	TRUE	FALSE	FALSE	11
AT2G27530	FALSE	TRUE	FALSE	TRUE	TRUE	TRUE	TRUE	FALSE	TRUE	TRUE	TRUE	TRUE	TRUE	FALSE	TRUE	FALSE	11
AT2G29190	FALSE	FALSE	TRUE	TRUE	TRUE	FALSE	TRUE	TRUE	TRUE	TRUE	TRUE	TRUE	TRUE	TRUE	FALSE	FALSE	11
AT2G30530	FALSE	FALSE	TRUE	TRUE	TRUE	TRUE	TRUE	TRUE	TRUE	TRUE	TRUE	FALSE	FALSE	TRUE	FALSE	TRUE	11
AT2G38560	FALSE	FALSE	TRUE	TRUE	TRUE	TRUE	TRUE	TRUE	TRUE	TRUE	TRUE	TRUE	TRUE	FALSE	FALSE	FALSE	11
AT2G38910	FALSE	FALSE	TRUE	TRUE	TRUE	TRUE	FALSE	TRUE	TRUE	TRUE	TRUE	TRUE	FALSE	TRUE	FALSE	TRUE	11
AT2G39340	FALSE	TRUE	FALSE	FALSE	TRUE	TRUE	TRUE	FALSE	TRUE	TRUE	TRUE	TRUE	TRUE	FALSE	TRUE	TRUE	11
AT2G40290	FALSE	FALSE	FALSE	TRUE	TRUE	TRUE	TRUE	FALSE	TRUE	TRUE	TRUE	TRUE	TRUE	TRUE	FALSE	TRUE	11
AT2G40550	FALSE	TRUE	TRUE	TRUE	FALSE	TRUE	TRUE	TRUE	TRUE	FALSE	TRUE	TRUE	TRUE	TRUE	FALSE	FALSE	11
AT2G41350	FALSE	FALSE	TRUE	TRUE	TRUE	TRUE	TRUE	TRUE	TRUE	TRUE	TRUE	FALSE	TRUE	FALSE	TRUE	FALSE	11
AT2G41530	FALSE	FALSE	TRUE	TRUE	FALSE	TRUE	TRUE	TRUE	TRUE	FALSE	TRUE	TRUE	TRUE	TRUE	TRUE	FALSE	11
AT2G45560	FALSE	FALSE	TRUE	TRUE	FALSE	TRUE	TRUE	TRUE	TRUE	FALSE	TRUE	TRUE	FALSE	TRUE	TRUE	TRUE	11
AT2G45910	FALSE	FALSE	TRUE	TRUE	TRUE	TRUE	FALSE	FALSE	TRUE	TRUE	TRUE	TRUE	TRUE	TRUE	TRUE	FALSE	11
AT2G46500	FALSE	FALSE	TRUE	FALSE	TRUE	TRUE	TRUE	FALSE	TRUE	TRUE	TRUE	TRUE	FALSE	TRUE	TRUE	TRUE	11
AT2G47470	FALSE	TRUE	TRUE	TRUE	TRUE	FALSE	FALSE	TRUE	TRUE	TRUE	FALSE	TRUE	TRUE	TRUE	TRUE	FALSE	11
AT3G02420	FALSE	FALSE	TRUE	TRUE	TRUE	TRUE	FALSE	TRUE	TRUE	TRUE	TRUE	TRUE	FALSE	TRUE	TRUE	FALSE	11
AT3G06240	FALSE	TRUE	TRUE	TRUE	FALSE	TRUE	TRUE	FALSE	TRUE	FALSE	TRUE	TRUE	TRUE	TRUE	TRUE	FALSE	11
AT3G10950	FALSE	TRUE	TRUE	TRUE	TRUE	TRUE	TRUE	FALSE	TRUE	TRUE	TRUE	FALSE	TRUE	TRUE	FALSE	FALSE	11
AT3G12120	FALSE	TRUE	TRUE	TRUE	FALSE	TRUE	TRUE	TRUE	TRUE	FALSE	TRUE	TRUE	FALSE	TRUE	TRUE	FALSE	11
AT3G13470	FALSE	FALSE	FALSE	TRUE	TRUE	TRUE	TRUE	FALSE	TRUE	TRUE	TRUE	TRUE	TRUE	TRUE	TRUE	FALSE	11
AT3G15970	FALSE	FALSE	TRUE	TRUE	TRUE	TRUE	TRUE	FALSE	FALSE	TRUE	TRUE	TRUE	TRUE	TRUE	TRUE	FALSE	11
AT3G16060	FALSE	FALSE	FALSE	TRUE	TRUE	TRUE	TRUE	TRUE	TRUE	TRUE	FALSE	TRUE	FALSE	TRUE	TRUE	TRUE	11
AT3G16360	FALSE	TRUE	TRUE	TRUE	TRUE	TRUE	FALSE	TRUE	TRUE	TRUE	TRUE	FALSE	TRUE	FALSE	TRUE	FALSE	11
AT3G18290	FALSE	FALSE	TRUE	TRUE	TRUE	TRUE	TRUE	TRUE	TRUE	TRUE	TRUE	FALSE	TRUE	FALSE	TRUE	FALSE	11
AT3G21390	FALSE	FALSE	TRUE	TRUE	TRUE	TRUE	FALSE	TRUE	TRUE	TRUE	TRUE	TRUE	FALSE	FALSE	TRUE	TRUE	11
AT3G23980	FALSE	FALSE	TRUE	TRUE	TRUE	TRUE	FALSE	TRUE	TRUE	TRUE	TRUE	TRUE	FALSE	TRUE	TRUE	FALSE	11
AT3G24495	FALSE	FALSE	FALSE	TRUE	TRUE	TRUE	FALSE	TRUE	TRUE	TRUE	TRUE	TRUE	TRUE	TRUE	TRUE	FALSE	11
AT3G28360	FALSE	TRUE	TRUE	TRUE	FALSE	TRUE	TRUE	TRUE	TRUE	FALSE	TRUE	TRUE	TRUE	TRUE	FALSE	FALSE	11
AT3G47570	TRUE	FALSE	TRUE	TRUE	TRUE	TRUE	TRUE	FALSE	TRUE	TRUE	TRUE	TRUE	FALSE	FALSE	TRUE	FALSE	11
AT3G47700	FALSE	TRUE	TRUE	TRUE	FALSE	TRUE	TRUE	TRUE	TRUE	FALSE	TRUE	TRUE	TRUE	FALSE	TRUE	FALSE	11
AT3G48700	FALSE	FALSE	TRUE	TRUE	FALSE	TRUE	TRUE	TRUE	TRUE	FALSE	TRUE	TRUE	FALSE	TRUE	TRUE	TRUE	11
AT3G48750	FALSE	FALSE	TRUE	TRUE	TRUE	TRUE	TRUE	TRUE	TRUE	TRUE	FALSE	TRUE	TRUE	FALSE	TRUE	FALSE	11
AT3G51390	FALSE	FALSE	FALSE	TRUE	TRUE	TRUE	TRUE	FALSE	TRUE	TRUE	TRUE	TRUE	TRUE	TRUE	TRUE	FALSE	11
AT3G51730	TRUE	FALSE	TRUE	TRUE	FALSE	TRUE	TRUE	FALSE	TRUE	FALSE	TRUE	TRUE	TRUE	TRUE	FALSE	TRUE	11
AT3G54020	FALSE	TRUE	TRUE	TRUE	TRUE	FALSE	TRUE	FALSE	TRUE	TRUE	TRUE	TRUE	TRUE	TRUE	FALSE	FALSE	11
AT3G54190	FALSE	TRUE	TRUE	TRUE	TRUE	TRUE	TRUE	FALSE	TRUE	TRUE	FALSE	TRUE	FALSE	TRUE	TRUE	FALSE	11
AT3G55130	FALSE	TRUE	TRUE	TRUE	TRUE	TRUE	TRUE	TRUE	TRUE	TRUE	FALSE	TRUE	FALSE	TRUE	FALSE	FALSE	11
AT3G56230	FALSE	FALSE	TRUE	TRUE	TRUE	TRUE	TRUE	TRUE	FALSE	TRUE	TRUE	TRUE	FALSE	TRUE	TRUE	FALSE	11
AT3G56340	TRUE	TRUE	TRUE	TRUE	FALSE	TRUE	TRUE	TRUE	TRUE	FALSE	TRUE	TRUE	FALSE	FALSE	FALSE	TRUE	11
AT4G01310	FALSE	TRUE	TRUE	TRUE	FALSE	TRUE	TRUE	TRUE	TRUE	FALSE	TRUE	TRUE	FALSE	TRUE	TRUE	FALSE	11
AT4G02070	FALSE	TRUE	TRUE	TRUE	TRUE	TRUE	TRUE	FALSE	TRUE	TRUE	TRUE	TRUE	FALSE	FALSE	TRUE	FALSE	11
AT4G04510	FALSE	FALSE	TRUE	TRUE	TRUE	TRUE	TRUE	TRUE	TRUE	TRUE	FALSE	TRUE	FALSE	TRUE	TRUE	FALSE	11
AT4G08790	FALSE	FALSE	TRUE	TRUE	FALSE	TRUE	TRUE	TRUE	TRUE	FALSE	TRUE	TRUE	TRUE	TRUE	TRUE	FALSE	11
AT4G10710	FALSE	FALSE	TRUE	TRUE	TRUE	TRUE	TRUE	FALSE	TRUE	TRUE	TRUE	TRUE	FALSE	TRUE	TRUE	FALSE	11
AT4G11210	FALSE	FALSE	TRUE	TRUE	TRUE	TRUE	FALSE	TRUE	TRUE	TRUE	FALSE	TRUE	TRUE	TRUE	TRUE	FALSE	11
AT4G11220	FALSE	FALSE	TRUE	TRUE	TRUE	TRUE	FALSE	TRUE	TRUE	TRUE	FALSE	TRUE	TRUE	TRUE	TRUE	FALSE	11
AT4G12350	FALSE	FALSE	TRUE	TRUE	TRUE	TRUE	FALSE	FALSE	TRUE	TRUE	TRUE	TRUE	TRUE	TRUE	TRUE	FALSE	11
AT4G13830	FALSE	TRUE	TRUE	FALSE	TRUE	TRUE	FALSE	FALSE	TRUE	TRUE	TRUE	TRUE	FALSE	TRUE	TRUE	TRUE	11
AT4G16630	FALSE	FALSE	TRUE	TRUE	TRUE	TRUE	TRUE	TRUE	TRUE	TRUE	TRUE	FALSE	FALSE	TRUE	TRUE	FALSE	11
AT4G18340	FALSE	TRUE	FALSE	TRUE	TRUE	TRUE	FALSE	TRUE	FALSE	TRUE	TRUE	TRUE	TRUE	FALSE	TRUE	TRUE	11
AT4G18710	FALSE	TRUE	FALSE	TRUE	TRUE	TRUE	TRUE	FALSE	TRUE	TRUE	FALSE	TRUE	TRUE	TRUE	TRUE	FALSE	11
AT4G19003	FALSE	TRUE	TRUE	TRUE	TRUE	TRUE	FALSE	FALSE	FALSE	TRUE	TRUE	TRUE	FALSE	TRUE	TRUE	TRUE	11
AT4G23270	FALSE	TRUE	TRUE	TRUE	TRUE	TRUE	FALSE	TRUE	TRUE	TRUE	FALSE	TRUE	FALSE	TRUE	TRUE	FALSE	11
AT4G23740	FALSE	FALSE	TRUE	TRUE	TRUE	TRUE	FALSE	TRUE	TRUE	TRUE	FALSE	TRUE	TRUE	TRUE	TRUE	FALSE	11
AT4G23820	FALSE	FALSE	TRUE	TRUE	TRUE	TRUE	TRUE	FALSE	TRUE	TRUE	TRUE	TRUE	FALSE	TRUE	TRUE	FALSE	11
AT4G24280	FALSE	FALSE	TRUE	FALSE	TRUE	TRUE	TRUE	FALSE	TRUE	TRUE	TRUE	TRUE	FALSE	TRUE	TRUE	TRUE	11
AT4G24690	FALSE	TRUE	FALSE	FALSE	TRUE	TRUE	TRUE	TRUE	TRUE	TRUE	TRUE	TRUE	FALSE	TRUE	TRUE	FALSE	11
AT4G26550	TRUE	FALSE	FALSE	TRUE	TRUE	TRUE	TRUE	FALSE	TRUE	TRUE	TRUE	TRUE	FALSE	TRUE	TRUE	FALSE	11
AT4G29160	FALSE	TRUE	FALSE	TRUE	TRUE	TRUE	TRUE	FALSE	TRUE	TRUE	TRUE	TRUE	TRUE	TRUE	FALSE	FALSE	11
AT4G30100	FALSE	FALSE	TRUE	TRUE	TRUE	TRUE	TRUE	FALSE	TRUE	TRUE	TRUE	TRUE	TRUE	TRUE	FALSE	FALSE	11
AT4G31350	FALSE	FALSE	TRUE	TRUE	TRUE	TRUE	TRUE	FALSE	TRUE	TRUE	TRUE	TRUE	TRUE	FALSE	TRUE	FALSE	11
AT4G32590	FALSE	TRUE	FALSE	TRUE	TRUE	TRUE	TRUE	TRUE	TRUE	TRUE	TRUE	TRUE	TRUE	FALSE	FALSE	FALSE	11
AT4G33200	FALSE	TRUE	TRUE	TRUE	TRUE	FALSE	TRUE	FALSE	TRUE	TRUE	TRUE	TRUE	TRUE	TRUE	FALSE	FALSE	11
AT4G35740	FALSE	TRUE	TRUE	TRUE	FALSE	TRUE	TRUE	TRUE	TRUE	FALSE	TRUE	TRUE	FALSE	TRUE	TRUE	FALSE	11
AT4G37130	FALSE	FALSE	TRUE	TRUE	TRUE	TRUE	FALSE	TRUE	TRUE	TRUE	TRUE	TRUE	FALSE	TRUE	TRUE	FALSE	11
AT4G37630	FALSE	FALSE	TRUE	TRUE	TRUE	TRUE	FALSE	TRUE	TRUE	TRUE	TRUE	TRUE	FALSE	TRUE	TRUE	FALSE	11
AT4G38920	FALSE	TRUE	TRUE	TRUE	FALSE	TRUE	TRUE	FALSE	TRUE	FALSE	TRUE	TRUE	TRUE	TRUE	TRUE	FALSE	11
AT4G39900	FALSE	TRUE	FALSE	FALSE	FALSE	TRUE	TRUE	TRUE	TRUE	FALSE	TRUE	TRUE	TRUE	TRUE	TRUE	TRUE	11
AT5G06530	FALSE	FALSE	TRUE	TRUE	TRUE	TRUE	TRUE	FALSE	TRUE	TRUE	TRUE	TRUE	TRUE	TRUE	FALSE	FALSE	11
AT5G07100	FALSE	FALSE	TRUE	TRUE	TRUE	TRUE	TRUE	FALSE	TRUE	TRUE	TRUE	FALSE	TRUE	TRUE	FALSE	TRUE	11
AT5G08050	FALSE	TRUE	FALSE	TRUE	TRUE	TRUE	TRUE	FALSE	TRUE	TRUE	TRUE	TRUE	FALSE	TRUE	TRUE	FALSE	11
AT5G10270	FALSE	TRUE	FALSE	TRUE	TRUE	TRUE	TRUE	FALSE	TRUE	TRUE	TRUE	FALSE	TRUE	TRUE	TRUE	FALSE	11
AT5G11790	FALSE	FALSE	TRUE	TRUE	TRUE	TRUE	TRUE	TRUE	TRUE	TRUE	TRUE	FALSE	TRUE	FALSE	TRUE	FALSE	11
AT5G13170	FALSE	TRUE	TRUE	FALSE	FALSE	TRUE	FALSE	TRUE	TRUE	FALSE	TRUE	TRUE	TRUE	TRUE	TRUE	TRUE	11
AT5G17240	FALSE	FALSE	FALSE	TRUE	TRUE	TRUE	TRUE	TRUE	TRUE	TRUE	TRUE	TRUE	FALSE	TRUE	TRUE	FALSE	11
AT5G18110	FALSE	FALSE	TRUE	TRUE	FALSE	TRUE	TRUE	TRUE	TRUE	FALSE	TRUE	TRUE	TRUE	TRUE	TRUE	FALSE	11
AT5G18750	FALSE	FALSE	TRUE	TRUE	FALSE	TRUE	TRUE	TRUE	TRUE	FALSE	FALSE	TRUE	TRUE	TRUE	TRUE	TRUE	11
AT5G21990	FALSE	TRUE	TRUE	TRUE	FALSE	TRUE	TRUE	FALSE	TRUE	FALSE	TRUE	TRUE	TRUE	TRUE	TRUE	FALSE	11
AT5G25930	FALSE	FALSE	TRUE	TRUE	TRUE	TRUE	TRUE	TRUE	TRUE	TRUE	FALSE	FALSE	TRUE	TRUE	TRUE	FALSE	11
AT5G43130	FALSE	FALSE	TRUE	TRUE	TRUE	TRUE	TRUE	FALSE	TRUE	TRUE	TRUE	TRUE	FALSE	TRUE	TRUE	FALSE	11
AT5G43900	FALSE	FALSE	TRUE	FALSE	TRUE	TRUE	TRUE	TRUE	TRUE	TRUE	TRUE	FALSE	TRUE	TRUE	TRUE	FALSE	11
AT5G44560	FALSE	FALSE	FALSE	TRUE	FALSE	TRUE	TRUE	TRUE	TRUE	FALSE	TRUE	TRUE	TRUE	TRUE	TRUE	TRUE	11
AT5G45360	FALSE	TRUE	TRUE	TRUE	TRUE	TRUE	TRUE	FALSE	TRUE	TRUE	FALSE	TRUE	FALSE	TRUE	TRUE	FALSE	11
AT5G45600	FALSE	TRUE	TRUE	TRUE	TRUE	TRUE	TRUE	FALSE	TRUE	TRUE	FALSE	TRUE	FALSE	TRUE	TRUE	FALSE	11
AT5G46370	FALSE	TRUE	FALSE	TRUE	TRUE	TRUE	TRUE	FALSE	TRUE	TRUE	TRUE	TRUE	FALSE	TRUE	TRUE	FALSE	11
AT5G47520	FALSE	TRUE	FALSE	TRUE	FALSE	TRUE	TRUE	FALSE	TRUE	FALSE	TRUE	TRUE	TRUE	TRUE	TRUE	TRUE	11
AT5G48560	FALSE	FALSE	TRUE	TRUE	FALSE	TRUE	TRUE	TRUE	TRUE	FALSE	TRUE	TRUE	FALSE	TRUE	TRUE	TRUE	11
AT5G49230	FALSE	TRUE	TRUE	TRUE	TRUE	TRUE	FALSE	FALSE	TRUE	TRUE	FALSE	TRUE	TRUE	TRUE	TRUE	FALSE	11
AT5G53150	FALSE	TRUE	TRUE	TRUE	TRUE	TRUE	TRUE	FALSE	FALSE	TRUE	FALSE	TRUE	TRUE	TRUE	TRUE	FALSE	11
AT5G53400	FALSE	FALSE	TRUE	TRUE	TRUE	TRUE	TRUE	TRUE	TRUE	TRUE	TRUE	TRUE	FALSE	FALSE	TRUE	FALSE	11
AT5G54440	FALSE	FALSE	TRUE	TRUE	TRUE	TRUE	TRUE	TRUE	TRUE	TRUE	TRUE	TRUE	FALSE	FALSE	TRUE	FALSE	11
AT5G55190	FALSE	TRUE	TRUE	TRUE	FALSE	TRUE	TRUE	TRUE	TRUE	FALSE	TRUE	TRUE	FALSE	FALSE	TRUE	TRUE	11
AT5G55480	FALSE	FALSE	TRUE	TRUE	TRUE	TRUE	TRUE	TRUE	TRUE	TRUE	TRUE	FALSE	TRUE	FALSE	TRUE	FALSE	11
AT5G58470	FALSE	FALSE	TRUE	TRUE	TRUE	TRUE	TRUE	FALSE	TRUE	TRUE	FALSE	TRUE	TRUE	TRUE	TRUE	FALSE	11
AT5G58510	FALSE	TRUE	FALSE	TRUE	FALSE	TRUE	TRUE	TRUE	TRUE	FALSE	TRUE	TRUE	TRUE	TRUE	TRUE	FALSE	11
AT5G64350	FALSE	TRUE	TRUE	TRUE	TRUE	TRUE	TRUE	FALSE	TRUE	TRUE	TRUE	TRUE	FALSE	FALSE	TRUE	FALSE	11
AT5G66680	FALSE	FALSE	FALSE	TRUE	TRUE	TRUE	TRUE	FALSE	TRUE	TRUE	TRUE	TRUE	TRUE	TRUE	TRUE	FALSE	11
BCA4	FALSE	TRUE	TRUE	TRUE	TRUE	TRUE	TRUE	FALSE	TRUE	TRUE	TRUE	TRUE	FALSE	FALSE	TRUE	FALSE	11
BIR2	FALSE	TRUE	TRUE	TRUE	TRUE	TRUE	TRUE	FALSE	TRUE	TRUE	TRUE	TRUE	FALSE	FALSE	TRUE	FALSE	11
BLH6	FALSE	FALSE	TRUE	TRUE	TRUE	FALSE	FALSE	TRUE	TRUE	TRUE	TRUE	TRUE	FALSE	TRUE	TRUE	TRUE	11
BRL2	FALSE	FALSE	TRUE	TRUE	TRUE	TRUE	TRUE	TRUE	TRUE	TRUE	TRUE	TRUE	FALSE	FALSE	TRUE	FALSE	11
BRM	FALSE	FALSE	TRUE	TRUE	TRUE	TRUE	FALSE	FALSE	TRUE	TRUE	TRUE	TRUE	TRUE	TRUE	TRUE	FALSE	11
BZIP9	FALSE	FALSE	FALSE	TRUE	TRUE	TRUE	TRUE	TRUE	TRUE	TRUE	TRUE	TRUE	FALSE	TRUE	TRUE	FALSE	11
C94B3	FALSE	FALSE	FALSE	TRUE	FALSE	TRUE	TRUE	TRUE	TRUE	FALSE	TRUE	TRUE	TRUE	TRUE	TRUE	TRUE	11
CCL11	FALSE	FALSE	TRUE	TRUE	TRUE	TRUE	TRUE	TRUE	TRUE	TRUE	TRUE	TRUE	FALSE	FALSE	TRUE	FALSE	11
CDF3	FALSE	FALSE	TRUE	FALSE	TRUE	TRUE	TRUE	TRUE	TRUE	TRUE	TRUE	TRUE	TRUE	FALSE	TRUE	FALSE	11
CESA3	FALSE	TRUE	TRUE	TRUE	FALSE	TRUE	TRUE	FALSE	TRUE	FALSE	TRUE	TRUE	TRUE	TRUE	TRUE	FALSE	11
CFIS1	FALSE	FALSE	FALSE	TRUE	TRUE	TRUE	TRUE	FALSE	TRUE	TRUE	TRUE	TRUE	TRUE	TRUE	TRUE	FALSE	11
CINV1	FALSE	FALSE	TRUE	TRUE	TRUE	TRUE	TRUE	TRUE	TRUE	TRUE	TRUE	TRUE	TRUE	FALSE	FALSE	FALSE	11
CIPK6	FALSE	FALSE	TRUE	TRUE	TRUE	TRUE	TRUE	FALSE	TRUE	TRUE	TRUE	TRUE	FALSE	TRUE	TRUE	FALSE	11
CLPB1	FALSE	TRUE	TRUE	TRUE	TRUE	FALSE	TRUE	FALSE	TRUE	TRUE	TRUE	TRUE	TRUE	TRUE	FALSE	FALSE	11
CMT3	FALSE	FALSE	FALSE	TRUE	TRUE	TRUE	TRUE	TRUE	TRUE	TRUE	TRUE	TRUE	TRUE	FALSE	TRUE	FALSE	11
CRN	FALSE	FALSE	TRUE	TRUE	TRUE	TRUE	TRUE	TRUE	FALSE	TRUE	TRUE	TRUE	TRUE	FALSE	TRUE	FALSE	11
CRU3	FALSE	FALSE	TRUE	TRUE	TRUE	TRUE	TRUE	TRUE	TRUE	TRUE	TRUE	TRUE	FALSE	TRUE	FALSE	FALSE	11
CUL1	FALSE	FALSE	TRUE	TRUE	TRUE	TRUE	TRUE	TRUE	TRUE	TRUE	TRUE	TRUE	FALSE	TRUE	FALSE	FALSE	11
DHSO	FALSE	FALSE	TRUE	TRUE	TRUE	TRUE	TRUE	FALSE	TRUE	TRUE	TRUE	TRUE	TRUE	TRUE	FALSE	FALSE	11
FBL17	FALSE	TRUE	FALSE	TRUE	TRUE	TRUE	TRUE	FALSE	TRUE	TRUE	TRUE	TRUE	FALSE	TRUE	FALSE	TRUE	11
FLD	FALSE	FALSE	TRUE	TRUE	TRUE	TRUE	FALSE	FALSE	TRUE	TRUE	TRUE	TRUE	TRUE	FALSE	TRUE	TRUE	11
FNRL1	FALSE	FALSE	FALSE	TRUE	TRUE	TRUE	TRUE	FALSE	TRUE	TRUE	TRUE	TRUE	TRUE	TRUE	TRUE	FALSE	11
GAI	FALSE	FALSE	TRUE	TRUE	TRUE	TRUE	FALSE	FALSE	TRUE	TRUE	TRUE	TRUE	TRUE	TRUE	TRUE	FALSE	11
HIR1	FALSE	FALSE	FALSE	TRUE	TRUE	TRUE	TRUE	FALSE	TRUE	TRUE	TRUE	FALSE	TRUE	TRUE	TRUE	TRUE	11
HS902	FALSE	TRUE	TRUE	TRUE	FALSE	TRUE	TRUE	TRUE	TRUE	FALSE	FALSE	FALSE	TRUE	TRUE	TRUE	TRUE	11
HSFA2	FALSE	TRUE	TRUE	TRUE	TRUE	FALSE	FALSE	TRUE	TRUE	TRUE	TRUE	TRUE	TRUE	FALSE	TRUE	FALSE	11
HSR4	FALSE	TRUE	TRUE	FALSE	TRUE	TRUE	FALSE	FALSE	TRUE	TRUE	TRUE	TRUE	FALSE	TRUE	TRUE	TRUE	11
HUA2	FALSE	FALSE	TRUE	TRUE	TRUE	TRUE	TRUE	FALSE	FALSE	TRUE	TRUE	TRUE	FALSE	TRUE	TRUE	TRUE	11
ICE1	FALSE	TRUE	TRUE	TRUE	TRUE	TRUE	TRUE	FALSE	TRUE	TRUE	TRUE	TRUE	TRUE	FALSE	FALSE	FALSE	11
IMK3	FALSE	FALSE	TRUE	TRUE	TRUE	TRUE	TRUE	FALSE	TRUE	TRUE	TRUE	TRUE	TRUE	FALSE	TRUE	FALSE	11
KEG	FALSE	TRUE	FALSE	TRUE	TRUE	TRUE	TRUE	TRUE	TRUE	TRUE	FALSE	TRUE	FALSE	TRUE	TRUE	FALSE	11
LUH	FALSE	FALSE	TRUE	TRUE	TRUE	TRUE	TRUE	FALSE	TRUE	TRUE	TRUE	TRUE	FALSE	TRUE	TRUE	FALSE	11
MDHX1	FALSE	TRUE	FALSE	TRUE	FALSE	TRUE	TRUE	TRUE	TRUE	FALSE	TRUE	TRUE	TRUE	TRUE	TRUE	FALSE	11
MFP2	FALSE	TRUE	TRUE	TRUE	TRUE	FALSE	TRUE	FALSE	TRUE	TRUE	TRUE	TRUE	TRUE	TRUE	FALSE	FALSE	11
MYB88	FALSE	TRUE	TRUE	TRUE	FALSE	TRUE	TRUE	TRUE	FALSE	FALSE	TRUE	TRUE	TRUE	TRUE	TRUE	FALSE	11
OCP3	FALSE	FALSE	TRUE	TRUE	TRUE	TRUE	TRUE	FALSE	TRUE	TRUE	TRUE	TRUE	TRUE	FALSE	TRUE	FALSE	11
PBL3	FALSE	FALSE	TRUE	TRUE	TRUE	TRUE	TRUE	FALSE	TRUE	TRUE	TRUE	TRUE	TRUE	TRUE	FALSE	FALSE	11
PLY13	FALSE	FALSE	TRUE	TRUE	TRUE	TRUE	FALSE	FALSE	TRUE	TRUE	TRUE	TRUE	TRUE	TRUE	TRUE	FALSE	11
PRK5	FALSE	TRUE	TRUE	TRUE	TRUE	TRUE	TRUE	FALSE	TRUE	TRUE	TRUE	FALSE	FALSE	TRUE	TRUE	FALSE	11
Q1G3Q4	FALSE	TRUE	TRUE	TRUE	TRUE	TRUE	TRUE	FALSE	TRUE	TRUE	TRUE	TRUE	TRUE	FALSE	FALSE	FALSE	11
RBR1	FALSE	TRUE	TRUE	TRUE	TRUE	TRUE	TRUE	TRUE	TRUE	TRUE	FALSE	TRUE	FALSE	TRUE	FALSE	FALSE	11
RIPK	FALSE	FALSE	TRUE	TRUE	FALSE	TRUE	TRUE	TRUE	TRUE	FALSE	TRUE	TRUE	TRUE	TRUE	TRUE	FALSE	11
RIPS	FALSE	FALSE	TRUE	FALSE	TRUE	TRUE	TRUE	TRUE	TRUE	TRUE	TRUE	TRUE	FALSE	TRUE	FALSE	TRUE	11
RLK1	FALSE	TRUE	TRUE	TRUE	FALSE	TRUE	TRUE	TRUE	TRUE	FALSE	TRUE	TRUE	FALSE	TRUE	TRUE	FALSE	11
SBIR1	FALSE	FALSE	TRUE	TRUE	FALSE	TRUE	TRUE	TRUE	TRUE	FALSE	TRUE	TRUE	TRUE	TRUE	TRUE	FALSE	11
SCAR1	FALSE	TRUE	FALSE	TRUE	FALSE	TRUE	TRUE	FALSE	TRUE	FALSE	TRUE	TRUE	TRUE	TRUE	TRUE	TRUE	11
SLAH3	FALSE	TRUE	TRUE	TRUE	FALSE	TRUE	TRUE	TRUE	TRUE	FALSE	TRUE	TRUE	TRUE	FALSE	TRUE	FALSE	11
TPL	FALSE	TRUE	TRUE	TRUE	TRUE	FALSE	TRUE	TRUE	FALSE	TRUE	FALSE	TRUE	TRUE	TRUE	FALSE	TRUE	11
TRXH3	FALSE	TRUE	TRUE	TRUE	FALSE	TRUE	TRUE	TRUE	TRUE	FALSE	TRUE	TRUE	FALSE	TRUE	TRUE	FALSE	11
WEE1	FALSE	FALSE	TRUE	TRUE	TRUE	TRUE	TRUE	TRUE	TRUE	TRUE	TRUE	FALSE	TRUE	FALSE	TRUE	FALSE	11
WRK71	FALSE	FALSE	TRUE	FALSE	TRUE	TRUE	TRUE	TRUE	FALSE	TRUE	TRUE	TRUE	FALSE	TRUE	TRUE	TRUE	11
Y1743	FALSE	TRUE	TRUE	TRUE	TRUE	TRUE	TRUE	FALSE	TRUE	TRUE	TRUE	TRUE	FALSE	TRUE	FALSE	FALSE	11
ZDP	FALSE	TRUE	TRUE	TRUE	TRUE	TRUE	TRUE	TRUE	FALSE	TRUE	FALSE	TRUE	FALSE	TRUE	TRUE	FALSE	11
1.1.1.219	FALSE	FALSE	TRUE	TRUE	FALSE	TRUE	TRUE	TRUE	TRUE	FALSE	TRUE	TRUE	FALSE	TRUE	TRUE	FALSE	10
1.1.1.79	FALSE	FALSE	TRUE	TRUE	FALSE	TRUE	TRUE	FALSE	TRUE	FALSE	TRUE	TRUE	TRUE	FALSE	TRUE	TRUE	10
1.11.1.9	FALSE	TRUE	TRUE	TRUE	FALSE	TRUE	TRUE	FALSE	TRUE	FALSE	TRUE	FALSE	TRUE	TRUE	TRUE	FALSE	10
1.13.11.5	FALSE	TRUE	TRUE	TRUE	TRUE	TRUE	TRUE	FALSE	TRUE	TRUE	TRUE	FALSE	FALSE	FALSE	TRUE	FALSE	10
1.13.99.1	FALSE	FALSE	TRUE	TRUE	TRUE	FALSE	TRUE	TRUE	TRUE	TRUE	TRUE	TRUE	TRUE	FALSE	FALSE	FALSE	10
1.14.14.107	FALSE	FALSE	TRUE	TRUE	TRUE	FALSE	TRUE	TRUE	TRUE	TRUE	FALSE	TRUE	TRUE	FALSE	TRUE	FALSE	10
1.2.1.12	FALSE	TRUE	TRUE	TRUE	FALSE	TRUE	TRUE	FALSE	TRUE	FALSE	TRUE	TRUE	FALSE	TRUE	TRUE	FALSE	10
1.2.3.14	FALSE	TRUE	TRUE	TRUE	FALSE	TRUE	TRUE	FALSE	TRUE	FALSE	TRUE	TRUE	FALSE	TRUE	TRUE	FALSE	10
1.3.1.93	FALSE	TRUE	FALSE	TRUE	FALSE	FALSE	TRUE	TRUE	TRUE	FALSE	TRUE	TRUE	TRUE	TRUE	TRUE	FALSE	10
1.4.3.21	FALSE	FALSE	FALSE	TRUE	FALSE	TRUE	TRUE	TRUE	TRUE	FALSE	TRUE	TRUE	TRUE	TRUE	FALSE	TRUE	10
1.5.3.1	FALSE	FALSE	FALSE	TRUE	TRUE	TRUE	TRUE	TRUE	TRUE	TRUE	TRUE	TRUE	FALSE	FALSE	TRUE	FALSE	10
1.8.1.9	FALSE	TRUE	TRUE	TRUE	FALSE	TRUE	TRUE	FALSE	TRUE	FALSE	TRUE	TRUE	FALSE	TRUE	TRUE	FALSE	10
1.8.5.1	FALSE	TRUE	FALSE	TRUE	TRUE	TRUE	TRUE	FALSE	TRUE	TRUE	TRUE	FALSE	TRUE	FALSE	TRUE	FALSE	10
2.3.3.8	FALSE	FALSE	FALSE	TRUE	TRUE	TRUE	TRUE	FALSE	TRUE	TRUE	TRUE	TRUE	FALSE	TRUE	TRUE	FALSE	10
2.5.1.6	FALSE	FALSE	TRUE	TRUE	TRUE	FALSE	TRUE	TRUE	TRUE	TRUE	TRUE	TRUE	TRUE	FALSE	FALSE	FALSE	10
2.5.1.87	FALSE	TRUE	TRUE	TRUE	FALSE	TRUE	TRUE	FALSE	TRUE	FALSE	TRUE	TRUE	FALSE	TRUE	TRUE	FALSE	10
2.7.1.25	FALSE	FALSE	TRUE	TRUE	TRUE	TRUE	TRUE	TRUE	TRUE	TRUE	TRUE	TRUE	FALSE	FALSE	FALSE	FALSE	10
2.7.4.6	FALSE	TRUE	FALSE	TRUE	FALSE	TRUE	TRUE	FALSE	TRUE	FALSE	TRUE	TRUE	TRUE	FALSE	TRUE	TRUE	10
2.7.8.1	FALSE	TRUE	TRUE	TRUE	TRUE	TRUE	TRUE	FALSE	TRUE	TRUE	TRUE	FALSE	FALSE	FALSE	TRUE	FALSE	10
3.1.1.32	FALSE	TRUE	TRUE	TRUE	FALSE	TRUE	TRUE	TRUE	TRUE	FALSE	TRUE	FALSE	TRUE	FALSE	TRUE	FALSE	10
3.1.2.22	FALSE	TRUE	TRUE	TRUE	FALSE	TRUE	TRUE	TRUE	TRUE	FALSE	TRUE	TRUE	FALSE	FALSE	TRUE	FALSE	10
3.1.4.3	FALSE	FALSE	FALSE	TRUE	TRUE	TRUE	TRUE	TRUE	TRUE	TRUE	TRUE	TRUE	FALSE	FALSE	TRUE	FALSE	10
3.4.11.1	FALSE	TRUE	FALSE	TRUE	TRUE	TRUE	FALSE	TRUE	TRUE	TRUE	TRUE	FALSE	FALSE	FALSE	TRUE	TRUE	10
3.5.5.4	FALSE	FALSE	FALSE	TRUE	FALSE	TRUE	TRUE	TRUE	TRUE	FALSE	TRUE	TRUE	TRUE	TRUE	TRUE	FALSE	10
4.1.2.27	FALSE	TRUE	FALSE	TRUE	FALSE	TRUE	TRUE	FALSE	TRUE	FALSE	TRUE	TRUE	TRUE	TRUE	FALSE	TRUE	10
4.1.99.17	FALSE	TRUE	TRUE	FALSE	TRUE	TRUE	TRUE	FALSE	TRUE	TRUE	TRUE	TRUE	FALSE	FALSE	TRUE	FALSE	10
4.2.1.18	FALSE	TRUE	FALSE	TRUE	TRUE	FALSE	TRUE	FALSE	TRUE	TRUE	TRUE	FALSE	TRUE	TRUE	TRUE	FALSE	10
5.4.2.2	FALSE	FALSE	TRUE	TRUE	FALSE	TRUE	TRUE	TRUE	TRUE	FALSE	TRUE	TRUE	TRUE	FALSE	FALSE	TRUE	10
5.4.3.8	FALSE	TRUE	TRUE	TRUE	TRUE	FALSE	TRUE	FALSE	TRUE	TRUE	TRUE	TRUE	TRUE	FALSE	FALSE	FALSE	10
6.2.1.26	FALSE	FALSE	TRUE	TRUE	TRUE	TRUE	TRUE	FALSE	TRUE	TRUE	TRUE	TRUE	FALSE	TRUE	FALSE	FALSE	10
6.3.2.3	FALSE	FALSE	TRUE	FALSE	TRUE	TRUE	TRUE	TRUE	TRUE	TRUE	TRUE	TRUE	FALSE	TRUE	FALSE	FALSE	10
ACOX4	FALSE	FALSE	FALSE	TRUE	TRUE	TRUE	TRUE	FALSE	TRUE	TRUE	TRUE	TRUE	TRUE	FALSE	TRUE	FALSE	10
ACS	FALSE	FALSE	TRUE	TRUE	FALSE	TRUE	TRUE	FALSE	TRUE	FALSE	TRUE	TRUE	TRUE	TRUE	TRUE	FALSE	10
AHK5	FALSE	TRUE	TRUE	FALSE	FALSE	TRUE	TRUE	FALSE	TRUE	FALSE	TRUE	TRUE	TRUE	TRUE	TRUE	FALSE	10
AK1	FALSE	TRUE	TRUE	TRUE	FALSE	TRUE	TRUE	TRUE	TRUE	FALSE	TRUE	TRUE	FALSE	FALSE	TRUE	FALSE	10
APRR7	FALSE	FALSE	TRUE	TRUE	TRUE	TRUE	FALSE	TRUE	TRUE	TRUE	TRUE	TRUE	FALSE	FALSE	FALSE	TRUE	10
APS2	FALSE	TRUE	TRUE	TRUE	FALSE	TRUE	TRUE	TRUE	TRUE	FALSE	TRUE	TRUE	FALSE	FALSE	TRUE	FALSE	10
APX3	FALSE	FALSE	TRUE	FALSE	FALSE	TRUE	TRUE	TRUE	TRUE	FALSE	TRUE	FALSE	TRUE	TRUE	TRUE	TRUE	10
AT1G01260	FALSE	FALSE	TRUE	TRUE	TRUE	FALSE	TRUE	FALSE	FALSE	TRUE	TRUE	TRUE	TRUE	TRUE	TRUE	FALSE	10
AT1G01520	FALSE	FALSE	TRUE	TRUE	TRUE	TRUE	TRUE	FALSE	TRUE	TRUE	TRUE	TRUE	FALSE	TRUE	FALSE	FALSE	10
AT1G01700	FALSE	FALSE	TRUE	TRUE	FALSE	TRUE	TRUE	TRUE	FALSE	FALSE	TRUE	TRUE	TRUE	TRUE	TRUE	FALSE	10
AT1G01880	FALSE	FALSE	FALSE	TRUE	TRUE	FALSE	TRUE	FALSE	TRUE	TRUE	TRUE	TRUE	TRUE	TRUE	TRUE	FALSE	10
AT1G05785	FALSE	TRUE	TRUE	TRUE	TRUE	FALSE	FALSE	TRUE	FALSE	TRUE	TRUE	TRUE	TRUE	TRUE	FALSE	FALSE	10
AT1G06890	FALSE	TRUE	FALSE	FALSE	TRUE	TRUE	TRUE	FALSE	TRUE	TRUE	TRUE	TRUE	FALSE	TRUE	TRUE	FALSE	10
AT1G08810	TRUE	TRUE	FALSE	TRUE	FALSE	TRUE	TRUE	FALSE	TRUE	FALSE	TRUE	TRUE	FALSE	TRUE	TRUE	FALSE	10
AT1G09960	FALSE	TRUE	TRUE	TRUE	TRUE	TRUE	FALSE	FALSE	TRUE	TRUE	TRUE	FALSE	TRUE	FALSE	TRUE	FALSE	10
AT1G16470	FALSE	FALSE	TRUE	FALSE	TRUE	TRUE	TRUE	TRUE	TRUE	TRUE	TRUE	TRUE	FALSE	TRUE	FALSE	FALSE	10
AT1G17860	FALSE	FALSE	TRUE	TRUE	TRUE	TRUE	TRUE	FALSE	FALSE	TRUE	FALSE	TRUE	TRUE	TRUE	TRUE	FALSE	10
AT1G18660	FALSE	TRUE	TRUE	TRUE	FALSE	TRUE	TRUE	TRUE	TRUE	FALSE	FALSE	TRUE	TRUE	FALSE	TRUE	FALSE	10
AT1G19835	FALSE	TRUE	TRUE	TRUE	FALSE	TRUE	TRUE	TRUE	TRUE	FALSE	FALSE	FALSE	TRUE	TRUE	TRUE	FALSE	10
AT1G20770	FALSE	FALSE	TRUE	TRUE	TRUE	TRUE	TRUE	TRUE	TRUE	TRUE	FALSE	TRUE	FALSE	FALSE	TRUE	FALSE	10
AT1G21320	FALSE	TRUE	FALSE	TRUE	FALSE	TRUE	TRUE	FALSE	FALSE	FALSE	TRUE	TRUE	TRUE	TRUE	TRUE	TRUE	10
AT1G21590	FALSE	FALSE	TRUE	TRUE	TRUE	TRUE	TRUE	FALSE	FALSE	TRUE	TRUE	TRUE	FALSE	TRUE	TRUE	FALSE	10
AT1G22050	FALSE	TRUE	FALSE	TRUE	FALSE	FALSE	FALSE	TRUE	TRUE	FALSE	TRUE	TRUE	TRUE	TRUE	TRUE	TRUE	10
AT1G22450	FALSE	TRUE	TRUE	TRUE	TRUE	FALSE	TRUE	FALSE	TRUE	TRUE	FALSE	TRUE	TRUE	FALSE	TRUE	FALSE	10
AT1G26110	FALSE	TRUE	FALSE	TRUE	TRUE	TRUE	TRUE	FALSE	TRUE	TRUE	TRUE	FALSE	FALSE	TRUE	TRUE	FALSE	10
AT1G26880	FALSE	TRUE	FALSE	TRUE	TRUE	TRUE	TRUE	FALSE	FALSE	TRUE	FALSE	TRUE	TRUE	TRUE	TRUE	FALSE	10
AT1G30070	FALSE	FALSE	TRUE	TRUE	FALSE	TRUE	TRUE	TRUE	TRUE	FALSE	TRUE	TRUE	FALSE	TRUE	TRUE	FALSE	10
AT1G30440	FALSE	FALSE	FALSE	FALSE	TRUE	FALSE	TRUE	FALSE	TRUE	TRUE	TRUE	TRUE	TRUE	TRUE	TRUE	TRUE	10
AT1G32210	FALSE	FALSE	TRUE	TRUE	TRUE	TRUE	TRUE	FALSE	TRUE	TRUE	TRUE	FALSE	TRUE	FALSE	TRUE	FALSE	10
AT1G35710	FALSE	TRUE	TRUE	TRUE	FALSE	TRUE	TRUE	FALSE	TRUE	FALSE	TRUE	TRUE	FALSE	TRUE	TRUE	FALSE	10
AT1G44575	FALSE	TRUE	FALSE	FALSE	TRUE	TRUE	TRUE	FALSE	TRUE	TRUE	TRUE	TRUE	FALSE	TRUE	TRUE	FALSE	10
AT1G44900	FALSE	TRUE	FALSE	FALSE	TRUE	TRUE	FALSE	TRUE	TRUE	TRUE	FALSE	FALSE	TRUE	TRUE	TRUE	TRUE	10
AT1G47420	FALSE	FALSE	TRUE	TRUE	FALSE	TRUE	TRUE	TRUE	TRUE	FALSE	TRUE	TRUE	FALSE	TRUE	FALSE	TRUE	10
AT1G47710	FALSE	TRUE	TRUE	TRUE	FALSE	TRUE	TRUE	FALSE	TRUE	FALSE	TRUE	TRUE	FALSE	TRUE	TRUE	FALSE	10
AT1G53520	FALSE	FALSE	TRUE	FALSE	TRUE	FALSE	TRUE	TRUE	TRUE	TRUE	FALSE	TRUE	TRUE	TRUE	TRUE	FALSE	10
AT1G54170	FALSE	TRUE	TRUE	TRUE	TRUE	FALSE	FALSE	FALSE	TRUE	TRUE	FALSE	TRUE	TRUE	TRUE	TRUE	FALSE	10
AT1G55750	FALSE	FALSE	TRUE	TRUE	TRUE	TRUE	TRUE	FALSE	TRUE	TRUE	TRUE	FALSE	FALSE	TRUE	TRUE	FALSE	10
AT1G55910	FALSE	FALSE	FALSE	TRUE	TRUE	TRUE	TRUE	FALSE	TRUE	TRUE	TRUE	TRUE	TRUE	FALSE	TRUE	FALSE	10
AT1G56130	FALSE	FALSE	TRUE	FALSE	TRUE	TRUE	TRUE	TRUE	TRUE	TRUE	TRUE	TRUE	FALSE	FALSE	TRUE	FALSE	10
AT1G56140	FALSE	FALSE	FALSE	TRUE	TRUE	TRUE	TRUE	FALSE	TRUE	TRUE	FALSE	TRUE	TRUE	TRUE	TRUE	FALSE	10
AT1G56145	TRUE	FALSE	TRUE	TRUE	TRUE	FALSE	TRUE	FALSE	TRUE	TRUE	TRUE	FALSE	TRUE	FALSE	FALSE	TRUE	10
AT1G56170	FALSE	FALSE	TRUE	TRUE	TRUE	FALSE	TRUE	FALSE	TRUE	TRUE	TRUE	FALSE	TRUE	TRUE	TRUE	FALSE	10
AT1G61370	FALSE	TRUE	FALSE	TRUE	FALSE	TRUE	TRUE	FALSE	TRUE	FALSE	TRUE	TRUE	TRUE	TRUE	TRUE	FALSE	10
AT1G65030	FALSE	FALSE	TRUE	TRUE	TRUE	TRUE	TRUE	FALSE	TRUE	TRUE	FALSE	TRUE	TRUE	FALSE	TRUE	FALSE	10
AT1G70300	FALSE	TRUE	TRUE	TRUE	TRUE	TRUE	TRUE	TRUE	TRUE	TRUE	FALSE	FALSE	FALSE	FALSE	TRUE	FALSE	10
AT1G71020	FALSE	FALSE	TRUE	TRUE	TRUE	TRUE	FALSE	FALSE	TRUE	TRUE	TRUE	TRUE	FALSE	TRUE	FALSE	TRUE	10
AT1G75250	FALSE	FALSE	TRUE	TRUE	TRUE	TRUE	TRUE	FALSE	TRUE	TRUE	TRUE	TRUE	FALSE	TRUE	FALSE	FALSE	10
AT1G78420	FALSE	FALSE	TRUE	FALSE	FALSE	TRUE	TRUE	TRUE	TRUE	FALSE	TRUE	TRUE	TRUE	TRUE	TRUE	FALSE	10
AT1G80510	FALSE	TRUE	TRUE	TRUE	FALSE	TRUE	TRUE	FALSE	FALSE	FALSE	TRUE	TRUE	TRUE	FALSE	TRUE	TRUE	10
AT2G02470	FALSE	FALSE	TRUE	TRUE	TRUE	TRUE	TRUE	FALSE	TRUE	TRUE	TRUE	FALSE	TRUE	FALSE	FALSE	TRUE	10
AT2G05620	TRUE	TRUE	FALSE	TRUE	FALSE	TRUE	TRUE	TRUE	TRUE	FALSE	FALSE	FALSE	TRUE	TRUE	FALSE	TRUE	10
AT2G16250	FALSE	FALSE	TRUE	TRUE	FALSE	TRUE	TRUE	FALSE	TRUE	FALSE	TRUE	TRUE	TRUE	TRUE	TRUE	FALSE	10
AT2G17150	FALSE	FALSE	TRUE	TRUE	FALSE	TRUE	TRUE	FALSE	TRUE	FALSE	TRUE	TRUE	TRUE	TRUE	TRUE	FALSE	10
AT2G19640	FALSE	TRUE	TRUE	TRUE	FALSE	TRUE	TRUE	FALSE	TRUE	FALSE	TRUE	FALSE	TRUE	TRUE	TRUE	FALSE	10
AT2G20060	FALSE	FALSE	TRUE	TRUE	TRUE	TRUE	FALSE	FALSE	TRUE	TRUE	FALSE	TRUE	FALSE	TRUE	TRUE	TRUE	10
AT2G20300	FALSE	TRUE	TRUE	TRUE	FALSE	TRUE	TRUE	FALSE	TRUE	FALSE	TRUE	TRUE	FALSE	FALSE	TRUE	TRUE	10
AT2G20450	FALSE	TRUE	FALSE	TRUE	FALSE	TRUE	TRUE	TRUE	TRUE	FALSE	FALSE	TRUE	TRUE	TRUE	TRUE	FALSE	10
AT2G21270	FALSE	TRUE	TRUE	TRUE	FALSE	TRUE	TRUE	FALSE	TRUE	FALSE	TRUE	TRUE	TRUE	FALSE	TRUE	FALSE	10
AT2G24420	FALSE	TRUE	TRUE	TRUE	FALSE	TRUE	TRUE	FALSE	TRUE	FALSE	FALSE	TRUE	TRUE	TRUE	TRUE	FALSE	10
AT2G24500	FALSE	TRUE	TRUE	TRUE	FALSE	TRUE	TRUE	FALSE	TRUE	FALSE	TRUE	TRUE	FALSE	TRUE	TRUE	FALSE	10
AT2G25280	FALSE	TRUE	FALSE	TRUE	TRUE	TRUE	FALSE	TRUE	FALSE	TRUE	TRUE	TRUE	TRUE	TRUE	FALSE	FALSE	10
AT2G28380	FALSE	FALSE	TRUE	TRUE	TRUE	TRUE	TRUE	TRUE	TRUE	TRUE	FALSE	TRUE	FALSE	TRUE	FALSE	FALSE	10
AT2G34040	FALSE	FALSE	TRUE	TRUE	FALSE	TRUE	TRUE	TRUE	TRUE	FALSE	TRUE	TRUE	FALSE	TRUE	TRUE	FALSE	10
AT2G36480	FALSE	TRUE	TRUE	TRUE	FALSE	TRUE	TRUE	FALSE	TRUE	FALSE	FALSE	TRUE	FALSE	TRUE	TRUE	TRUE	10
AT2G38250	FALSE	FALSE	TRUE	TRUE	FALSE	TRUE	TRUE	FALSE	TRUE	FALSE	TRUE	TRUE	FALSE	TRUE	TRUE	TRUE	10
AT2G38620	FALSE	TRUE	TRUE	TRUE	TRUE	TRUE	TRUE	FALSE	TRUE	TRUE	TRUE	TRUE	FALSE	FALSE	FALSE	FALSE	10
AT2G38760	FALSE	FALSE	FALSE	FALSE	TRUE	TRUE	TRUE	TRUE	FALSE	TRUE	FALSE	TRUE	TRUE	TRUE	TRUE	TRUE	10
AT2G39960	FALSE	FALSE	TRUE	TRUE	FALSE	TRUE	TRUE	TRUE	TRUE	FALSE	TRUE	TRUE	TRUE	TRUE	FALSE	FALSE	10
AT2G40590	FALSE	FALSE	TRUE	TRUE	TRUE	TRUE	TRUE	FALSE	TRUE	TRUE	TRUE	TRUE	FALSE	FALSE	TRUE	FALSE	10
AT2G41475	FALSE	TRUE	TRUE	TRUE	TRUE	TRUE	TRUE	FALSE	FALSE	TRUE	FALSE	TRUE	FALSE	TRUE	TRUE	FALSE	10
AT2G41705	FALSE	TRUE	TRUE	TRUE	TRUE	FALSE	TRUE	FALSE	TRUE	TRUE	TRUE	TRUE	FALSE	TRUE	FALSE	FALSE	10
AT2G41835	FALSE	TRUE	TRUE	FALSE	FALSE	TRUE	TRUE	TRUE	TRUE	FALSE	TRUE	TRUE	TRUE	FALSE	TRUE	FALSE	10
AT2G43030	FALSE	FALSE	TRUE	TRUE	TRUE	FALSE	FALSE	TRUE	TRUE	TRUE	FALSE	TRUE	TRUE	TRUE	TRUE	FALSE	10
AT2G45200	FALSE	TRUE	TRUE	TRUE	FALSE	TRUE	TRUE	FALSE	TRUE	FALSE	TRUE	TRUE	FALSE	FALSE	TRUE	TRUE	10
AT2G46800	FALSE	TRUE	FALSE	TRUE	FALSE	TRUE	TRUE	TRUE	TRUE	FALSE	TRUE	TRUE	TRUE	TRUE	FALSE	FALSE	10
AT2G47400	FALSE	FALSE	FALSE	TRUE	TRUE	TRUE	FALSE	TRUE	TRUE	TRUE	FALSE	TRUE	FALSE	TRUE	TRUE	TRUE	10
AT3G03790	FALSE	FALSE	TRUE	TRUE	FALSE	TRUE	TRUE	TRUE	TRUE	FALSE	TRUE	TRUE	FALSE	TRUE	TRUE	FALSE	10
AT3G07310	FALSE	FALSE	TRUE	TRUE	TRUE	TRUE	TRUE	FALSE	TRUE	TRUE	TRUE	TRUE	FALSE	TRUE	FALSE	FALSE	10
AT3G07950	FALSE	TRUE	FALSE	TRUE	FALSE	TRUE	TRUE	TRUE	TRUE	FALSE	TRUE	TRUE	FALSE	TRUE	TRUE	FALSE	10
AT3G08670	FALSE	TRUE	TRUE	TRUE	FALSE	TRUE	TRUE	FALSE	TRUE	FALSE	TRUE	FALSE	TRUE	TRUE	TRUE	FALSE	10
AT3G10330	FALSE	FALSE	TRUE	TRUE	TRUE	TRUE	TRUE	FALSE	TRUE	TRUE	TRUE	FALSE	TRUE	FALSE	TRUE	FALSE	10
AT3G10650	FALSE	FALSE	TRUE	TRUE	TRUE	TRUE	TRUE	TRUE	TRUE	TRUE	TRUE	FALSE	FALSE	FALSE	TRUE	FALSE	10
AT3G11070	FALSE	FALSE	TRUE	TRUE	FALSE	TRUE	TRUE	TRUE	TRUE	FALSE	TRUE	TRUE	FALSE	TRUE	TRUE	FALSE	10
AT3G11730	FALSE	TRUE	TRUE	TRUE	FALSE	TRUE	TRUE	FALSE	TRUE	FALSE	FALSE	TRUE	TRUE	TRUE	TRUE	FALSE	10
AT3G12680	FALSE	FALSE	FALSE	TRUE	FALSE	TRUE	TRUE	TRUE	TRUE	FALSE	TRUE	TRUE	TRUE	TRUE	TRUE	FALSE	10
AT3G15820	FALSE	TRUE	FALSE	TRUE	TRUE	TRUE	TRUE	FALSE	FALSE	TRUE	TRUE	TRUE	TRUE	FALSE	TRUE	FALSE	10
AT3G17170	FALSE	FALSE	TRUE	TRUE	TRUE	TRUE	TRUE	FALSE	TRUE	TRUE	TRUE	TRUE	TRUE	FALSE	FALSE	FALSE	10
AT3G19170	FALSE	FALSE	FALSE	TRUE	FALSE	TRUE	TRUE	TRUE	TRUE	FALSE	TRUE	TRUE	TRUE	TRUE	TRUE	FALSE	10
AT3G19220	FALSE	FALSE	TRUE	TRUE	FALSE	TRUE	TRUE	TRUE	TRUE	FALSE	TRUE	TRUE	FALSE	TRUE	TRUE	FALSE	10
AT3G19980	FALSE	FALSE	TRUE	TRUE	FALSE	TRUE	FALSE	TRUE	TRUE	FALSE	TRUE	TRUE	FALSE	TRUE	TRUE	TRUE	10
AT3G21330	FALSE	FALSE	TRUE	FALSE	TRUE	TRUE	TRUE	FALSE	TRUE	TRUE	TRUE	TRUE	TRUE	TRUE	FALSE	FALSE	10
AT3G22220	FALSE	FALSE	TRUE	TRUE	TRUE	TRUE	TRUE	FALSE	TRUE	TRUE	TRUE	FALSE	TRUE	FALSE	FALSE	TRUE	10
AT3G22320	FALSE	TRUE	TRUE	TRUE	TRUE	FALSE	TRUE	FALSE	TRUE	TRUE	TRUE	TRUE	TRUE	FALSE	FALSE	FALSE	10
AT3G22750	FALSE	FALSE	TRUE	TRUE	TRUE	TRUE	TRUE	FALSE	TRUE	TRUE	TRUE	FALSE	TRUE	FALSE	TRUE	FALSE	10
AT3G22845	FALSE	TRUE	FALSE	FALSE	TRUE	TRUE	TRUE	TRUE	TRUE	TRUE	TRUE	TRUE	FALSE	TRUE	FALSE	FALSE	10
AT3G24530	FALSE	TRUE	TRUE	TRUE	TRUE	TRUE	TRUE	FALSE	TRUE	TRUE	FALSE	TRUE	FALSE	FALSE	FALSE	TRUE	10
AT3G26700	FALSE	FALSE	FALSE	TRUE	TRUE	TRUE	TRUE	FALSE	FALSE	TRUE	TRUE	TRUE	FALSE	TRUE	TRUE	TRUE	10
AT3G43230	FALSE	FALSE	FALSE	TRUE	TRUE	TRUE	FALSE	TRUE	TRUE	TRUE	TRUE	TRUE	TRUE	TRUE	FALSE	FALSE	10
AT3G44350	FALSE	FALSE	FALSE	TRUE	FALSE	TRUE	TRUE	TRUE	TRUE	FALSE	TRUE	TRUE	TRUE	TRUE	TRUE	FALSE	10
AT3G46210	FALSE	FALSE	TRUE	FALSE	TRUE	TRUE	TRUE	FALSE	TRUE	TRUE	TRUE	TRUE	FALSE	TRUE	TRUE	FALSE	10
AT3G46590	FALSE	FALSE	FALSE	TRUE	FALSE	TRUE	TRUE	TRUE	TRUE	FALSE	TRUE	TRUE	TRUE	TRUE	TRUE	FALSE	10
AT3G51950	FALSE	FALSE	TRUE	FALSE	TRUE	TRUE	FALSE	FALSE	TRUE	TRUE	TRUE	TRUE	TRUE	TRUE	TRUE	FALSE	10
AT3G56410	FALSE	TRUE	TRUE	TRUE	FALSE	TRUE	TRUE	FALSE	TRUE	FALSE	TRUE	TRUE	FALSE	TRUE	TRUE	FALSE	10
AT3G58170	FALSE	FALSE	FALSE	TRUE	FALSE	TRUE	TRUE	TRUE	TRUE	FALSE	TRUE	TRUE	FALSE	TRUE	TRUE	TRUE	10
AT3G60240	FALSE	FALSE	TRUE	TRUE	TRUE	TRUE	TRUE	FALSE	TRUE	TRUE	TRUE	TRUE	FALSE	FALSE	FALSE	TRUE	10
AT3G60460	FALSE	TRUE	FALSE	TRUE	TRUE	TRUE	FALSE	FALSE	TRUE	TRUE	TRUE	TRUE	TRUE	TRUE	FALSE	FALSE	10
AT3G61600	FALSE	FALSE	FALSE	TRUE	TRUE	TRUE	TRUE	FALSE	TRUE	TRUE	TRUE	TRUE	TRUE	FALSE	TRUE	FALSE	10
AT4G04780	FALSE	TRUE	TRUE	TRUE	TRUE	TRUE	TRUE	FALSE	TRUE	TRUE	TRUE	TRUE	FALSE	FALSE	FALSE	FALSE	10
AT4G11180	FALSE	FALSE	TRUE	FALSE	TRUE	TRUE	TRUE	FALSE	FALSE	TRUE	TRUE	TRUE	TRUE	TRUE	TRUE	FALSE	10
AT4G13020	TRUE	FALSE	TRUE	TRUE	TRUE	FALSE	TRUE	FALSE	TRUE	TRUE	TRUE	FALSE	FALSE	TRUE	TRUE	FALSE	10
AT4G15780	FALSE	FALSE	TRUE	TRUE	TRUE	FALSE	TRUE	TRUE	FALSE	TRUE	FALSE	FALSE	TRUE	TRUE	TRUE	TRUE	10
AT4G16720	FALSE	TRUE	TRUE	TRUE	FALSE	TRUE	TRUE	FALSE	TRUE	FALSE	TRUE	TRUE	FALSE	TRUE	TRUE	FALSE	10
AT4G18700	FALSE	FALSE	TRUE	TRUE	FALSE	TRUE	TRUE	TRUE	FALSE	FALSE	TRUE	TRUE	FALSE	TRUE	TRUE	TRUE	10
AT4G19960	FALSE	TRUE	FALSE	TRUE	TRUE	TRUE	TRUE	FALSE	TRUE	TRUE	TRUE	TRUE	FALSE	FALSE	TRUE	FALSE	10
AT4G20890	FALSE	FALSE	FALSE	TRUE	TRUE	TRUE	TRUE	FALSE	TRUE	TRUE	TRUE	TRUE	FALSE	TRUE	TRUE	FALSE	10
AT4G23650	FALSE	TRUE	TRUE	TRUE	TRUE	TRUE	TRUE	FALSE	TRUE	TRUE	FALSE	TRUE	FALSE	FALSE	TRUE	FALSE	10
AT4G25160	FALSE	FALSE	FALSE	TRUE	FALSE	TRUE	TRUE	TRUE	TRUE	FALSE	TRUE	TRUE	TRUE	FALSE	TRUE	TRUE	10
AT4G28390	FALSE	FALSE	TRUE	TRUE	TRUE	TRUE	TRUE	FALSE	TRUE	TRUE	TRUE	TRUE	FALSE	TRUE	FALSE	FALSE	10
AT4G29330	FALSE	TRUE	FALSE	TRUE	FALSE	TRUE	TRUE	FALSE	TRUE	FALSE	TRUE	TRUE	TRUE	TRUE	TRUE	FALSE	10
AT4G31860	FALSE	FALSE	FALSE	TRUE	TRUE	TRUE	TRUE	FALSE	TRUE	TRUE	TRUE	TRUE	FALSE	TRUE	FALSE	TRUE	10
AT4G35900	FALSE	FALSE	TRUE	TRUE	FALSE	TRUE	TRUE	FALSE	TRUE	FALSE	TRUE	TRUE	TRUE	TRUE	TRUE	FALSE	10
AT4G36130	FALSE	FALSE	TRUE	TRUE	FALSE	TRUE	TRUE	TRUE	TRUE	FALSE	FALSE	TRUE	TRUE	TRUE	TRUE	FALSE	10
AT4G36390	FALSE	FALSE	TRUE	TRUE	TRUE	TRUE	TRUE	FALSE	TRUE	TRUE	TRUE	FALSE	FALSE	TRUE	TRUE	FALSE	10
AT5G01010	FALSE	FALSE	TRUE	FALSE	TRUE	TRUE	FALSE	FALSE	TRUE	TRUE	TRUE	TRUE	TRUE	TRUE	TRUE	FALSE	10
AT5G01630	FALSE	FALSE	TRUE	TRUE	TRUE	TRUE	TRUE	FALSE	TRUE	TRUE	TRUE	TRUE	FALSE	FALSE	FALSE	TRUE	10
AT5G04820	FALSE	TRUE	TRUE	TRUE	FALSE	TRUE	TRUE	FALSE	TRUE	FALSE	TRUE	TRUE	FALSE	TRUE	FALSE	TRUE	10
AT5G05560	FALSE	TRUE	FALSE	TRUE	FALSE	TRUE	TRUE	FALSE	TRUE	FALSE	TRUE	TRUE	TRUE	TRUE	TRUE	FALSE	10
AT5G07250	FALSE	FALSE	TRUE	TRUE	TRUE	TRUE	TRUE	FALSE	FALSE	TRUE	TRUE	TRUE	TRUE	TRUE	FALSE	FALSE	10
AT5G09250	FALSE	FALSE	TRUE	TRUE	FALSE	TRUE	TRUE	TRUE	TRUE	FALSE	TRUE	TRUE	TRUE	TRUE	FALSE	FALSE	10
AT5G10200	FALSE	FALSE	TRUE	TRUE	TRUE	TRUE	TRUE	FALSE	FALSE	TRUE	TRUE	TRUE	FALSE	TRUE	TRUE	FALSE	10
AT5G10940	FALSE	FALSE	TRUE	TRUE	TRUE	TRUE	TRUE	FALSE	TRUE	TRUE	TRUE	FALSE	TRUE	TRUE	FALSE	FALSE	10
AT5G12230	FALSE	FALSE	TRUE	FALSE	TRUE	TRUE	TRUE	FALSE	FALSE	TRUE	FALSE	TRUE	TRUE	TRUE	TRUE	TRUE	10
AT5G12320	FALSE	FALSE	TRUE	TRUE	TRUE	TRUE	TRUE	FALSE	TRUE	TRUE	TRUE	TRUE	FALSE	TRUE	FALSE	FALSE	10
AT5G12920	FALSE	FALSE	TRUE	FALSE	TRUE	TRUE	TRUE	FALSE	TRUE	TRUE	TRUE	TRUE	TRUE	FALSE	TRUE	FALSE	10
AT5G14240	FALSE	FALSE	FALSE	TRUE	FALSE	TRUE	TRUE	FALSE	TRUE	FALSE	TRUE	TRUE	TRUE	TRUE	TRUE	TRUE	10
AT5G23340	FALSE	TRUE	TRUE	TRUE	TRUE	TRUE	TRUE	TRUE	TRUE	TRUE	TRUE	FALSE	FALSE	FALSE	FALSE	FALSE	10
AT5G24100	FALSE	FALSE	TRUE	FALSE	FALSE	TRUE	TRUE	TRUE	TRUE	FALSE	TRUE	TRUE	FALSE	TRUE	TRUE	TRUE	10
AT5G33320	FALSE	TRUE	FALSE	FALSE	TRUE	TRUE	TRUE	FALSE	TRUE	TRUE	TRUE	TRUE	FALSE	TRUE	FALSE	TRUE	10
AT5G42660	FALSE	FALSE	TRUE	TRUE	TRUE	TRUE	TRUE	FALSE	TRUE	TRUE	TRUE	TRUE	FALSE	TRUE	FALSE	FALSE	10
AT5G42790	FALSE	FALSE	TRUE	TRUE	TRUE	TRUE	TRUE	FALSE	TRUE	TRUE	TRUE	TRUE	FALSE	TRUE	FALSE	FALSE	10
AT5G44800	FALSE	FALSE	TRUE	TRUE	TRUE	TRUE	TRUE	TRUE	TRUE	TRUE	TRUE	FALSE	FALSE	FALSE	TRUE	FALSE	10
AT5G46170	FALSE	FALSE	TRUE	TRUE	TRUE	TRUE	TRUE	FALSE	TRUE	TRUE	TRUE	TRUE	FALSE	FALSE	TRUE	FALSE	10
AT5G47210	FALSE	TRUE	TRUE	TRUE	TRUE	TRUE	TRUE	FALSE	FALSE	TRUE	TRUE	TRUE	FALSE	FALSE	TRUE	FALSE	10
AT5G50920	FALSE	TRUE	TRUE	TRUE	TRUE	FALSE	TRUE	FALSE	TRUE	TRUE	TRUE	TRUE	FALSE	TRUE	FALSE	FALSE	10
AT5G54680	FALSE	TRUE	TRUE	TRUE	TRUE	TRUE	TRUE	FALSE	TRUE	TRUE	TRUE	FALSE	FALSE	TRUE	FALSE	FALSE	10
AT5G55500	FALSE	FALSE	TRUE	FALSE	TRUE	TRUE	TRUE	TRUE	TRUE	TRUE	FALSE	TRUE	TRUE	FALSE	TRUE	FALSE	10
AT5G56890	FALSE	TRUE	TRUE	TRUE	TRUE	FALSE	TRUE	FALSE	TRUE	TRUE	TRUE	TRUE	TRUE	FALSE	FALSE	FALSE	10
AT5G56900	FALSE	TRUE	FALSE	TRUE	FALSE	TRUE	TRUE	TRUE	TRUE	FALSE	TRUE	TRUE	FALSE	TRUE	TRUE	FALSE	10
AT5G58030	FALSE	TRUE	TRUE	TRUE	FALSE	TRUE	TRUE	FALSE	FALSE	FALSE	TRUE	TRUE	TRUE	TRUE	TRUE	FALSE	10
AT5G58380	FALSE	TRUE	FALSE	TRUE	FALSE	TRUE	TRUE	FALSE	TRUE	FALSE	TRUE	TRUE	TRUE	TRUE	TRUE	FALSE	10
AT5G60860	FALSE	FALSE	TRUE	TRUE	FALSE	TRUE	TRUE	TRUE	TRUE	FALSE	TRUE	TRUE	TRUE	FALSE	TRUE	FALSE	10
AT5G61500	FALSE	FALSE	TRUE	TRUE	FALSE	TRUE	TRUE	TRUE	TRUE	FALSE	TRUE	TRUE	FALSE	TRUE	TRUE	FALSE	10
AT5G61970	FALSE	FALSE	TRUE	FALSE	TRUE	TRUE	TRUE	TRUE	TRUE	TRUE	FALSE	TRUE	FALSE	FALSE	TRUE	TRUE	10
AT5G65220	FALSE	FALSE	TRUE	TRUE	TRUE	TRUE	FALSE	FALSE	TRUE	TRUE	TRUE	TRUE	TRUE	FALSE	TRUE	FALSE	10
AT5G66770	FALSE	TRUE	FALSE	TRUE	FALSE	TRUE	TRUE	TRUE	TRUE	FALSE	TRUE	TRUE	FALSE	TRUE	TRUE	FALSE	10
AT5G66790	FALSE	TRUE	TRUE	TRUE	TRUE	TRUE	FALSE	TRUE	FALSE	TRUE	FALSE	TRUE	TRUE	TRUE	FALSE	FALSE	10
AT5G67270	FALSE	TRUE	TRUE	FALSE	FALSE	TRUE	TRUE	FALSE	TRUE	FALSE	TRUE	TRUE	TRUE	TRUE	TRUE	FALSE	10
AXR1	FALSE	FALSE	TRUE	TRUE	FALSE	TRUE	TRUE	TRUE	TRUE	FALSE	TRUE	TRUE	FALSE	TRUE	TRUE	FALSE	10
BADH2	FALSE	TRUE	TRUE	TRUE	FALSE	TRUE	TRUE	TRUE	FALSE	FALSE	FALSE	TRUE	TRUE	TRUE	TRUE	FALSE	10
BZP63	FALSE	FALSE	FALSE	TRUE	TRUE	TRUE	TRUE	TRUE	TRUE	TRUE	TRUE	TRUE	TRUE	FALSE	FALSE	FALSE	10
CALR3	FALSE	FALSE	TRUE	TRUE	TRUE	TRUE	TRUE	TRUE	FALSE	TRUE	FALSE	TRUE	FALSE	TRUE	FALSE	TRUE	10
CATA2	FALSE	FALSE	FALSE	TRUE	TRUE	TRUE	TRUE	FALSE	TRUE	TRUE	TRUE	TRUE	FALSE	TRUE	TRUE	FALSE	10
CDP1	FALSE	FALSE	TRUE	TRUE	FALSE	TRUE	TRUE	FALSE	TRUE	FALSE	FALSE	TRUE	TRUE	TRUE	TRUE	TRUE	10
CHLD	FALSE	TRUE	FALSE	TRUE	TRUE	TRUE	TRUE	FALSE	FALSE	TRUE	TRUE	TRUE	TRUE	TRUE	FALSE	FALSE	10
CIPK2	FALSE	FALSE	TRUE	TRUE	TRUE	TRUE	TRUE	FALSE	FALSE	TRUE	TRUE	TRUE	FALSE	TRUE	TRUE	FALSE	10
CIPK7	FALSE	FALSE	TRUE	TRUE	TRUE	TRUE	FALSE	FALSE	TRUE	TRUE	TRUE	TRUE	FALSE	TRUE	TRUE	FALSE	10
CMTA3	FALSE	FALSE	TRUE	TRUE	FALSE	TRUE	TRUE	FALSE	TRUE	FALSE	FALSE	TRUE	TRUE	TRUE	TRUE	TRUE	10
CRY2	FALSE	FALSE	TRUE	TRUE	TRUE	TRUE	FALSE	FALSE	TRUE	TRUE	TRUE	TRUE	TRUE	FALSE	TRUE	FALSE	10
D6PK	FALSE	TRUE	TRUE	TRUE	TRUE	FALSE	TRUE	FALSE	TRUE	TRUE	TRUE	TRUE	FALSE	TRUE	FALSE	FALSE	10
EFM	FALSE	FALSE	TRUE	TRUE	FALSE	TRUE	TRUE	FALSE	TRUE	FALSE	TRUE	TRUE	TRUE	TRUE	TRUE	FALSE	10
FAMA	FALSE	TRUE	FALSE	TRUE	FALSE	TRUE	TRUE	TRUE	TRUE	FALSE	TRUE	TRUE	FALSE	TRUE	TRUE	FALSE	10
FBW2	FALSE	TRUE	FALSE	TRUE	TRUE	FALSE	TRUE	TRUE	TRUE	TRUE	FALSE	TRUE	TRUE	FALSE	TRUE	FALSE	10
FCA	FALSE	TRUE	FALSE	TRUE	TRUE	TRUE	TRUE	FALSE	TRUE	TRUE	TRUE	TRUE	TRUE	FALSE	FALSE	FALSE	10
GBB	FALSE	FALSE	TRUE	TRUE	TRUE	TRUE	TRUE	FALSE	TRUE	TRUE	TRUE	TRUE	TRUE	FALSE	FALSE	FALSE	10
GMAN2	FALSE	FALSE	FALSE	TRUE	TRUE	TRUE	TRUE	TRUE	TRUE	TRUE	TRUE	TRUE	FALSE	TRUE	FALSE	FALSE	10
GSTF9	FALSE	TRUE	TRUE	TRUE	FALSE	TRUE	FALSE	TRUE	TRUE	FALSE	TRUE	TRUE	TRUE	TRUE	FALSE	FALSE	10
HSFA3	FALSE	TRUE	FALSE	TRUE	TRUE	TRUE	TRUE	FALSE	TRUE	TRUE	FALSE	TRUE	FALSE	TRUE	TRUE	FALSE	10
IWS1	FALSE	FALSE	TRUE	TRUE	TRUE	TRUE	TRUE	FALSE	TRUE	TRUE	TRUE	TRUE	TRUE	FALSE	FALSE	FALSE	10
LAF1	FALSE	FALSE	TRUE	TRUE	FALSE	TRUE	TRUE	TRUE	TRUE	FALSE	TRUE	TRUE	TRUE	TRUE	FALSE	FALSE	10
LRK54	FALSE	FALSE	TRUE	TRUE	FALSE	TRUE	TRUE	TRUE	TRUE	FALSE	TRUE	TRUE	FALSE	TRUE	FALSE	TRUE	10
MSBP1	FALSE	FALSE	TRUE	TRUE	FALSE	TRUE	TRUE	FALSE	TRUE	FALSE	TRUE	FALSE	TRUE	TRUE	TRUE	TRUE	10
MYB29	FALSE	TRUE	TRUE	TRUE	FALSE	TRUE	TRUE	TRUE	TRUE	FALSE	TRUE	TRUE	FALSE	TRUE	FALSE	FALSE	10
NIA2	FALSE	FALSE	TRUE	TRUE	TRUE	TRUE	FALSE	TRUE	FALSE	TRUE	TRUE	TRUE	TRUE	TRUE	FALSE	FALSE	10
O22138	FALSE	TRUE	FALSE	TRUE	TRUE	FALSE	TRUE	FALSE	TRUE	TRUE	TRUE	TRUE	FALSE	TRUE	TRUE	FALSE	10
O49654	FALSE	FALSE	FALSE	TRUE	FALSE	TRUE	TRUE	TRUE	TRUE	FALSE	TRUE	TRUE	TRUE	TRUE	TRUE	FALSE	10
P2C25	FALSE	TRUE	TRUE	TRUE	FALSE	TRUE	TRUE	FALSE	TRUE	FALSE	TRUE	TRUE	TRUE	TRUE	FALSE	FALSE	10
PAPS4	FALSE	TRUE	FALSE	TRUE	FALSE	TRUE	TRUE	TRUE	TRUE	FALSE	TRUE	TRUE	FALSE	TRUE	TRUE	FALSE	10
PBL2	FALSE	TRUE	TRUE	FALSE	FALSE	TRUE	TRUE	FALSE	TRUE	FALSE	TRUE	TRUE	TRUE	TRUE	TRUE	FALSE	10
PCNA2	FALSE	FALSE	TRUE	TRUE	TRUE	TRUE	TRUE	FALSE	TRUE	TRUE	TRUE	TRUE	FALSE	TRUE	FALSE	FALSE	10
PIN1	FALSE	TRUE	TRUE	TRUE	TRUE	TRUE	FALSE	FALSE	TRUE	TRUE	TRUE	TRUE	FALSE	FALSE	TRUE	FALSE	10
PLDA1	FALSE	TRUE	TRUE	TRUE	FALSE	TRUE	TRUE	FALSE	TRUE	FALSE	TRUE	TRUE	FALSE	TRUE	TRUE	FALSE	10
PLDB1	FALSE	FALSE	FALSE	TRUE	TRUE	TRUE	TRUE	TRUE	TRUE	TRUE	TRUE	FALSE	TRUE	TRUE	FALSE	FALSE	10
PME31	TRUE	FALSE	FALSE	TRUE	FALSE	TRUE	TRUE	FALSE	TRUE	FALSE	TRUE	TRUE	FALSE	TRUE	TRUE	TRUE	10
PME44	FALSE	FALSE	TRUE	TRUE	TRUE	TRUE	FALSE	FALSE	TRUE	TRUE	TRUE	TRUE	FALSE	TRUE	TRUE	FALSE	10
RA212	FALSE	FALSE	TRUE	TRUE	FALSE	TRUE	TRUE	TRUE	TRUE	FALSE	FALSE	TRUE	FALSE	TRUE	TRUE	TRUE	10
RCD1	FALSE	TRUE	TRUE	TRUE	TRUE	TRUE	FALSE	TRUE	TRUE	TRUE	TRUE	FALSE	FALSE	TRUE	FALSE	FALSE	10
RD23B	FALSE	FALSE	FALSE	FALSE	TRUE	TRUE	TRUE	TRUE	TRUE	TRUE	TRUE	TRUE	FALSE	TRUE	TRUE	FALSE	10
RPS2	FALSE	FALSE	TRUE	TRUE	FALSE	TRUE	TRUE	TRUE	TRUE	FALSE	FALSE	TRUE	FALSE	TRUE	TRUE	TRUE	10
SCE1	FALSE	FALSE	FALSE	TRUE	TRUE	TRUE	TRUE	FALSE	TRUE	TRUE	TRUE	TRUE	TRUE	FALSE	TRUE	FALSE	10
SCL23	FALSE	TRUE	TRUE	TRUE	TRUE	TRUE	TRUE	FALSE	TRUE	TRUE	FALSE	TRUE	FALSE	FALSE	TRUE	FALSE	10
SCL3	FALSE	FALSE	TRUE	TRUE	TRUE	TRUE	TRUE	FALSE	TRUE	TRUE	FALSE	TRUE	TRUE	TRUE	FALSE	FALSE	10
SERK2	FALSE	FALSE	TRUE	TRUE	FALSE	TRUE	TRUE	TRUE	TRUE	FALSE	TRUE	TRUE	TRUE	TRUE	FALSE	FALSE	10
TCP8	FALSE	FALSE	TRUE	TRUE	TRUE	TRUE	TRUE	TRUE	TRUE	TRUE	FALSE	TRUE	FALSE	FALSE	TRUE	FALSE	10
TGA2	FALSE	FALSE	TRUE	TRUE	TRUE	TRUE	TRUE	FALSE	TRUE	TRUE	TRUE	TRUE	FALSE	FALSE	FALSE	TRUE	10
TMK2	FALSE	TRUE	TRUE	TRUE	TRUE	TRUE	FALSE	FALSE	FALSE	TRUE	FALSE	TRUE	TRUE	TRUE	TRUE	FALSE	10
WIP2	FALSE	TRUE	FALSE	TRUE	TRUE	TRUE	TRUE	FALSE	TRUE	TRUE	TRUE	FALSE	TRUE	FALSE	TRUE	FALSE	10
WRK22	FALSE	FALSE	TRUE	TRUE	TRUE	TRUE	TRUE	TRUE	FALSE	TRUE	FALSE	TRUE	TRUE	TRUE	FALSE	FALSE	10
1.13.11.27	FALSE	FALSE	TRUE	TRUE	TRUE	TRUE	TRUE	TRUE	TRUE	TRUE	FALSE	FALSE	FALSE	FALSE	TRUE	FALSE	9
1.14.14.91	FALSE	FALSE	TRUE	TRUE	TRUE	TRUE	TRUE	FALSE	FALSE	TRUE	FALSE	TRUE	TRUE	FALSE	TRUE	FALSE	9
1.2.1.70	FALSE	TRUE	TRUE	TRUE	FALSE	FALSE	TRUE	FALSE	TRUE	FALSE	TRUE	TRUE	FALSE	TRUE	TRUE	FALSE	9
1.2.1.88	FALSE	FALSE	TRUE	TRUE	TRUE	TRUE	FALSE	FALSE	TRUE	TRUE	TRUE	FALSE	TRUE	FALSE	TRUE	FALSE	9
1.3.1.2	FALSE	TRUE	FALSE	TRUE	TRUE	FALSE	FALSE	FALSE	TRUE	TRUE	TRUE	FALSE	TRUE	TRUE	TRUE	FALSE	9
1.6.5.4	FALSE	FALSE	TRUE	TRUE	TRUE	TRUE	TRUE	FALSE	TRUE	TRUE	TRUE	FALSE	TRUE	FALSE	FALSE	FALSE	9
1.7.7.1	FALSE	TRUE	TRUE	FALSE	FALSE	TRUE	FALSE	TRUE	TRUE	FALSE	TRUE	TRUE	FALSE	TRUE	TRUE	FALSE	9
2.1.1.10	FALSE	FALSE	FALSE	TRUE	FALSE	TRUE	TRUE	TRUE	TRUE	FALSE	TRUE	TRUE	TRUE	TRUE	FALSE	FALSE	9
2.1.1.163	FALSE	FALSE	TRUE	TRUE	TRUE	TRUE	TRUE	FALSE	TRUE	TRUE	TRUE	TRUE	FALSE	FALSE	FALSE	FALSE	9
2.3.1.168	FALSE	TRUE	FALSE	TRUE	TRUE	TRUE	TRUE	FALSE	TRUE	TRUE	TRUE	FALSE	TRUE	FALSE	FALSE	FALSE	9
2.3.3.10	FALSE	TRUE	FALSE	TRUE	TRUE	FALSE	TRUE	TRUE	FALSE	TRUE	FALSE	TRUE	TRUE	FALSE	FALSE	TRUE	9
2.4.1.111	TRUE	FALSE	TRUE	TRUE	FALSE	TRUE	TRUE	FALSE	FALSE	FALSE	TRUE	FALSE	TRUE	TRUE	FALSE	TRUE	9
2.4.1.184	FALSE	TRUE	TRUE	FALSE	FALSE	TRUE	TRUE	TRUE	TRUE	FALSE	TRUE	TRUE	FALSE	FALSE	TRUE	FALSE	9
2.4.1.46	FALSE	TRUE	TRUE	TRUE	FALSE	TRUE	TRUE	FALSE	FALSE	FALSE	TRUE	TRUE	TRUE	TRUE	FALSE	FALSE	9
2.5.1.47	FALSE	TRUE	TRUE	TRUE	FALSE	FALSE	TRUE	FALSE	TRUE	FALSE	TRUE	TRUE	FALSE	TRUE	TRUE	FALSE	9
2.5.1.75	FALSE	TRUE	FALSE	TRUE	TRUE	TRUE	FALSE	FALSE	TRUE	TRUE	TRUE	TRUE	FALSE	FALSE	TRUE	FALSE	9
2.7.1.33	FALSE	FALSE	FALSE	TRUE	TRUE	TRUE	TRUE	FALSE	TRUE	TRUE	TRUE	TRUE	FALSE	FALSE	TRUE	FALSE	9
2.7.1.4	FALSE	FALSE	TRUE	TRUE	FALSE	TRUE	TRUE	FALSE	TRUE	FALSE	TRUE	TRUE	TRUE	TRUE	FALSE	FALSE	9
2.7.1.82	FALSE	TRUE	TRUE	FALSE	TRUE	FALSE	FALSE	FALSE	TRUE	TRUE	TRUE	TRUE	TRUE	TRUE	FALSE	FALSE	9
2.7.4.14	FALSE	FALSE	TRUE	TRUE	TRUE	TRUE	TRUE	FALSE	FALSE	TRUE	FALSE	TRUE	TRUE	TRUE	FALSE	FALSE	9
2.7.7.23	FALSE	TRUE	TRUE	TRUE	TRUE	TRUE	TRUE	TRUE	TRUE	TRUE	FALSE	FALSE	FALSE	FALSE	FALSE	FALSE	9
2.7.7.7	FALSE	FALSE	TRUE	TRUE	FALSE	TRUE	TRUE	FALSE	TRUE	FALSE	TRUE	TRUE	TRUE	FALSE	TRUE	FALSE	9
2.7.8.29	FALSE	TRUE	FALSE	TRUE	FALSE	TRUE	TRUE	FALSE	TRUE	FALSE	TRUE	TRUE	FALSE	TRUE	TRUE	FALSE	9
3.1.2.28	FALSE	TRUE	TRUE	TRUE	FALSE	TRUE	TRUE	FALSE	TRUE	FALSE	FALSE	TRUE	TRUE	TRUE	FALSE	FALSE	9
3.2.1.15	FALSE	TRUE	TRUE	FALSE	FALSE	TRUE	TRUE	FALSE	TRUE	FALSE	TRUE	TRUE	FALSE	TRUE	TRUE	FALSE	9
4.1.1.48	FALSE	FALSE	TRUE	TRUE	FALSE	TRUE	TRUE	TRUE	TRUE	FALSE	FALSE	TRUE	FALSE	FALSE	TRUE	TRUE	9
4.1.99.12	FALSE	TRUE	TRUE	TRUE	FALSE	TRUE	TRUE	FALSE	TRUE	FALSE	FALSE	TRUE	TRUE	TRUE	FALSE	FALSE	9
4.2.1.109	FALSE	TRUE	TRUE	TRUE	FALSE	TRUE	TRUE	FALSE	TRUE	FALSE	TRUE	TRUE	FALSE	FALSE	TRUE	FALSE	9
4.2.1.11	FALSE	FALSE	TRUE	TRUE	TRUE	TRUE	TRUE	FALSE	FALSE	TRUE	TRUE	TRUE	FALSE	FALSE	TRUE	FALSE	9
4.2.1.59	FALSE	TRUE	TRUE	TRUE	FALSE	TRUE	TRUE	FALSE	TRUE	FALSE	FALSE	TRUE	FALSE	TRUE	TRUE	FALSE	9
4.2.3.1	FALSE	TRUE	FALSE	TRUE	FALSE	TRUE	TRUE	FALSE	TRUE	FALSE	TRUE	TRUE	TRUE	FALSE	TRUE	FALSE	9
5.1.3.3	FALSE	FALSE	FALSE	TRUE	TRUE	FALSE	TRUE	TRUE	FALSE	TRUE	FALSE	TRUE	TRUE	TRUE	TRUE	FALSE	9
5.3.1.8	FALSE	FALSE	TRUE	FALSE	FALSE	TRUE	TRUE	TRUE	TRUE	FALSE	TRUE	TRUE	FALSE	TRUE	TRUE	FALSE	9
6.1.1.2	FALSE	TRUE	FALSE	TRUE	TRUE	TRUE	TRUE	FALSE	TRUE	TRUE	FALSE	TRUE	TRUE	FALSE	FALSE	FALSE	9
AAT3	FALSE	FALSE	TRUE	TRUE	FALSE	TRUE	TRUE	FALSE	TRUE	FALSE	TRUE	FALSE	TRUE	TRUE	TRUE	FALSE	9
AB14C	FALSE	TRUE	FALSE	FALSE	FALSE	TRUE	TRUE	FALSE	TRUE	FALSE	TRUE	TRUE	TRUE	TRUE	TRUE	FALSE	9
AB5C	FALSE	TRUE	TRUE	TRUE	TRUE	FALSE	FALSE	TRUE	TRUE	TRUE	TRUE	FALSE	FALSE	TRUE	FALSE	FALSE	9
AGL16	FALSE	TRUE	TRUE	TRUE	TRUE	FALSE	FALSE	TRUE	TRUE	TRUE	TRUE	TRUE	FALSE	FALSE	FALSE	FALSE	9
AIP2	FALSE	TRUE	TRUE	TRUE	TRUE	TRUE	FALSE	FALSE	TRUE	TRUE	FALSE	TRUE	TRUE	FALSE	FALSE	FALSE	9
ALD1	FALSE	FALSE	FALSE	FALSE	TRUE	TRUE	FALSE	TRUE	TRUE	TRUE	TRUE	TRUE	FALSE	TRUE	FALSE	TRUE	9
APT1	FALSE	FALSE	TRUE	TRUE	TRUE	TRUE	TRUE	FALSE	TRUE	TRUE	FALSE	TRUE	FALSE	FALSE	TRUE	FALSE	9
ARFS	FALSE	TRUE	TRUE	TRUE	FALSE	FALSE	TRUE	TRUE	FALSE	FALSE	FALSE	TRUE	FALSE	TRUE	TRUE	TRUE	9
AT1G01510	FALSE	TRUE	TRUE	FALSE	TRUE	TRUE	TRUE	FALSE	FALSE	TRUE	TRUE	TRUE	FALSE	TRUE	FALSE	FALSE	9
AT1G02140	FALSE	FALSE	TRUE	TRUE	TRUE	TRUE	TRUE	FALSE	FALSE	TRUE	FALSE	TRUE	TRUE	TRUE	FALSE	FALSE	9
AT1G05055	FALSE	FALSE	TRUE	TRUE	TRUE	FALSE	TRUE	FALSE	FALSE	TRUE	TRUE	TRUE	TRUE	TRUE	FALSE	FALSE	9
AT1G07210	FALSE	FALSE	TRUE	TRUE	FALSE	TRUE	TRUE	TRUE	FALSE	FALSE	FALSE	TRUE	TRUE	FALSE	TRUE	TRUE	9
AT1G07530	FALSE	FALSE	TRUE	TRUE	TRUE	TRUE	TRUE	FALSE	TRUE	TRUE	FALSE	TRUE	FALSE	FALSE	TRUE	FALSE	9
AT1G07840	FALSE	FALSE	FALSE	FALSE	TRUE	TRUE	TRUE	FALSE	TRUE	TRUE	TRUE	TRUE	FALSE	TRUE	TRUE	FALSE	9
AT1G08290	FALSE	TRUE	FALSE	FALSE	TRUE	TRUE	TRUE	FALSE	FALSE	TRUE	TRUE	TRUE	TRUE	FALSE	TRUE	FALSE	9
AT1G09080	FALSE	TRUE	TRUE	FALSE	TRUE	TRUE	FALSE	FALSE	FALSE	TRUE	FALSE	TRUE	FALSE	TRUE	TRUE	TRUE	9
AT1G09130	FALSE	FALSE	TRUE	TRUE	FALSE	TRUE	TRUE	TRUE	TRUE	FALSE	FALSE	FALSE	FALSE	TRUE	TRUE	TRUE	9
AT1G09330	FALSE	TRUE	TRUE	TRUE	FALSE	TRUE	FALSE	FALSE	TRUE	FALSE	TRUE	TRUE	TRUE	FALSE	TRUE	FALSE	9
AT1G10030	FALSE	TRUE	TRUE	TRUE	FALSE	TRUE	TRUE	FALSE	FALSE	FALSE	TRUE	FALSE	FALSE	TRUE	TRUE	TRUE	9
AT1G10170	FALSE	FALSE	FALSE	FALSE	TRUE	FALSE	TRUE	TRUE	TRUE	TRUE	FALSE	TRUE	FALSE	TRUE	TRUE	TRUE	9
AT1G10820	FALSE	TRUE	FALSE	TRUE	FALSE	TRUE	TRUE	TRUE	TRUE	FALSE	TRUE	TRUE	FALSE	FALSE	TRUE	FALSE	9
AT1G11480	FALSE	FALSE	TRUE	TRUE	TRUE	FALSE	TRUE	FALSE	TRUE	TRUE	FALSE	TRUE	TRUE	TRUE	FALSE	FALSE	9
AT1G15870	FALSE	FALSE	TRUE	TRUE	FALSE	TRUE	TRUE	TRUE	TRUE	FALSE	TRUE	TRUE	FALSE	TRUE	FALSE	FALSE	9
AT1G16890	FALSE	TRUE	TRUE	FALSE	FALSE	TRUE	TRUE	FALSE	TRUE	FALSE	TRUE	TRUE	FALSE	TRUE	TRUE	FALSE	9
AT1G17580	FALSE	FALSE	TRUE	TRUE	FALSE	FALSE	FALSE	TRUE	TRUE	FALSE	TRUE	TRUE	TRUE	TRUE	TRUE	FALSE	9
AT1G18950	FALSE	FALSE	TRUE	TRUE	FALSE	TRUE	FALSE	FALSE	TRUE	FALSE	TRUE	TRUE	FALSE	TRUE	TRUE	TRUE	9
AT1G19730	FALSE	TRUE	TRUE	TRUE	FALSE	FALSE	TRUE	TRUE	TRUE	FALSE	TRUE	TRUE	FALSE	FALSE	TRUE	FALSE	9
AT1G20810	FALSE	FALSE	TRUE	FALSE	TRUE	TRUE	TRUE	FALSE	FALSE	TRUE	TRUE	TRUE	FALSE	FALSE	TRUE	TRUE	9
AT1G21240	FALSE	TRUE	FALSE	TRUE	FALSE	TRUE	TRUE	TRUE	TRUE	FALSE	FALSE	FALSE	FALSE	TRUE	TRUE	TRUE	9
AT1G22310	FALSE	FALSE	TRUE	TRUE	FALSE	TRUE	TRUE	FALSE	TRUE	FALSE	TRUE	TRUE	TRUE	FALSE	TRUE	FALSE	9
AT1G31130	FALSE	FALSE	TRUE	TRUE	TRUE	FALSE	FALSE	TRUE	TRUE	TRUE	TRUE	FALSE	TRUE	FALSE	TRUE	FALSE	9
AT1G31720	FALSE	FALSE	FALSE	TRUE	TRUE	TRUE	TRUE	TRUE	TRUE	TRUE	FALSE	TRUE	FALSE	FALSE	TRUE	FALSE	9
AT1G31830	FALSE	FALSE	FALSE	TRUE	TRUE	TRUE	TRUE	FALSE	TRUE	TRUE	FALSE	TRUE	FALSE	TRUE	TRUE	FALSE	9
AT1G32400	FALSE	FALSE	TRUE	TRUE	FALSE	TRUE	TRUE	TRUE	TRUE	FALSE	TRUE	FALSE	FALSE	TRUE	FALSE	TRUE	9
AT1G33060	FALSE	FALSE	TRUE	TRUE	TRUE	TRUE	TRUE	FALSE	TRUE	TRUE	TRUE	FALSE	FALSE	TRUE	FALSE	FALSE	9
AT1G47750	FALSE	TRUE	TRUE	TRUE	FALSE	TRUE	TRUE	FALSE	TRUE	FALSE	FALSE	TRUE	TRUE	FALSE	TRUE	FALSE	9
AT1G49870	FALSE	TRUE	FALSE	FALSE	FALSE	TRUE	TRUE	FALSE	TRUE	FALSE	TRUE	TRUE	TRUE	TRUE	TRUE	FALSE	9
AT1G51790	FALSE	FALSE	FALSE	TRUE	TRUE	TRUE	FALSE	TRUE	TRUE	TRUE	FALSE	TRUE	FALSE	TRUE	TRUE	FALSE	9
AT1G53320	FALSE	FALSE	FALSE	TRUE	TRUE	TRUE	TRUE	FALSE	FALSE	TRUE	TRUE	FALSE	TRUE	TRUE	TRUE	FALSE	9
AT1G55230	FALSE	FALSE	FALSE	TRUE	TRUE	TRUE	FALSE	FALSE	TRUE	TRUE	TRUE	TRUE	TRUE	TRUE	FALSE	FALSE	9
AT1G55520	FALSE	TRUE	FALSE	TRUE	TRUE	TRUE	FALSE	FALSE	TRUE	TRUE	FALSE	TRUE	TRUE	FALSE	TRUE	FALSE	9
AT1G55670	FALSE	FALSE	TRUE	TRUE	FALSE	TRUE	TRUE	FALSE	TRUE	FALSE	TRUE	FALSE	TRUE	TRUE	TRUE	FALSE	9
AT1G57720	FALSE	FALSE	FALSE	TRUE	TRUE	TRUE	TRUE	FALSE	TRUE	TRUE	TRUE	TRUE	TRUE	FALSE	FALSE	FALSE	9
AT1G61580	FALSE	TRUE	TRUE	TRUE	TRUE	FALSE	TRUE	FALSE	TRUE	TRUE	TRUE	FALSE	FALSE	TRUE	FALSE	FALSE	9
AT1G61690	FALSE	TRUE	TRUE	FALSE	TRUE	FALSE	TRUE	FALSE	FALSE	TRUE	FALSE	TRUE	TRUE	TRUE	TRUE	FALSE	9
AT1G61800	FALSE	FALSE	TRUE	TRUE	TRUE	TRUE	FALSE	FALSE	TRUE	TRUE	TRUE	FALSE	TRUE	FALSE	TRUE	FALSE	9
AT1G64180	FALSE	FALSE	TRUE	TRUE	FALSE	TRUE	FALSE	FALSE	TRUE	FALSE	TRUE	TRUE	TRUE	TRUE	TRUE	FALSE	9
AT1G65870	FALSE	FALSE	TRUE	FALSE	TRUE	TRUE	TRUE	FALSE	TRUE	TRUE	FALSE	TRUE	FALSE	TRUE	TRUE	FALSE	9
AT1G66140	TRUE	TRUE	FALSE	FALSE	FALSE	TRUE	TRUE	TRUE	TRUE	FALSE	FALSE	TRUE	FALSE	TRUE	TRUE	FALSE	9
AT1G68410	FALSE	FALSE	FALSE	TRUE	FALSE	TRUE	TRUE	TRUE	TRUE	FALSE	TRUE	TRUE	FALSE	TRUE	TRUE	FALSE	9
AT1G69120	FALSE	FALSE	TRUE	TRUE	FALSE	TRUE	TRUE	TRUE	FALSE	FALSE	TRUE	TRUE	FALSE	TRUE	TRUE	FALSE	9
AT1G70000	FALSE	FALSE	TRUE	TRUE	FALSE	TRUE	TRUE	FALSE	TRUE	FALSE	TRUE	TRUE	FALSE	TRUE	TRUE	FALSE	9
AT1G70210	FALSE	FALSE	TRUE	TRUE	FALSE	TRUE	TRUE	TRUE	TRUE	FALSE	TRUE	FALSE	TRUE	TRUE	FALSE	FALSE	9
AT1G70280	FALSE	FALSE	TRUE	TRUE	FALSE	TRUE	TRUE	TRUE	FALSE	FALSE	TRUE	TRUE	TRUE	TRUE	FALSE	FALSE	9
AT1G72390	FALSE	FALSE	FALSE	TRUE	FALSE	TRUE	TRUE	FALSE	TRUE	FALSE	TRUE	TRUE	TRUE	TRUE	TRUE	FALSE	9
AT1G73040	FALSE	FALSE	FALSE	TRUE	TRUE	TRUE	TRUE	TRUE	TRUE	TRUE	TRUE	TRUE	FALSE	FALSE	FALSE	FALSE	9
AT1G73150	FALSE	FALSE	TRUE	TRUE	FALSE	TRUE	TRUE	FALSE	TRUE	FALSE	TRUE	TRUE	FALSE	TRUE	TRUE	FALSE	9
AT1G74720	FALSE	FALSE	TRUE	TRUE	FALSE	TRUE	TRUE	FALSE	TRUE	FALSE	TRUE	TRUE	FALSE	TRUE	TRUE	FALSE	9
AT1G75710	FALSE	TRUE	TRUE	TRUE	FALSE	TRUE	TRUE	FALSE	TRUE	FALSE	TRUE	FALSE	TRUE	TRUE	FALSE	FALSE	9
AT1G75850	FALSE	FALSE	TRUE	TRUE	FALSE	TRUE	TRUE	TRUE	TRUE	FALSE	FALSE	TRUE	FALSE	TRUE	TRUE	FALSE	9
AT1G76400	FALSE	FALSE	FALSE	TRUE	FALSE	TRUE	TRUE	TRUE	TRUE	FALSE	TRUE	TRUE	FALSE	TRUE	TRUE	FALSE	9
AT1G76710	FALSE	FALSE	FALSE	TRUE	FALSE	TRUE	TRUE	TRUE	TRUE	FALSE	FALSE	TRUE	TRUE	TRUE	TRUE	FALSE	9
AT1G77800	FALSE	FALSE	TRUE	TRUE	FALSE	TRUE	TRUE	FALSE	TRUE	FALSE	TRUE	TRUE	TRUE	FALSE	TRUE	FALSE	9
AT1G78290	FALSE	TRUE	TRUE	FALSE	TRUE	TRUE	TRUE	FALSE	FALSE	TRUE	TRUE	TRUE	TRUE	FALSE	FALSE	FALSE	9
AT1G78700	FALSE	TRUE	TRUE	TRUE	TRUE	TRUE	TRUE	FALSE	TRUE	TRUE	TRUE	FALSE	FALSE	FALSE	FALSE	FALSE	9
AT1G80350	FALSE	TRUE	TRUE	FALSE	FALSE	TRUE	TRUE	FALSE	TRUE	FALSE	TRUE	TRUE	FALSE	TRUE	TRUE	FALSE	9
AT1G80720	FALSE	FALSE	FALSE	TRUE	TRUE	TRUE	TRUE	FALSE	TRUE	TRUE	FALSE	TRUE	TRUE	FALSE	TRUE	FALSE	9
AT1G80900	FALSE	FALSE	TRUE	TRUE	FALSE	TRUE	TRUE	FALSE	FALSE	FALSE	TRUE	TRUE	FALSE	TRUE	TRUE	TRUE	9
AT2G02040	FALSE	TRUE	TRUE	TRUE	FALSE	TRUE	TRUE	FALSE	TRUE	FALSE	TRUE	FALSE	TRUE	FALSE	TRUE	FALSE	9
AT2G02170	FALSE	TRUE	TRUE	TRUE	FALSE	TRUE	TRUE	FALSE	TRUE	FALSE	TRUE	TRUE	FALSE	TRUE	FALSE	FALSE	9
AT2G02230	FALSE	TRUE	TRUE	FALSE	FALSE	TRUE	TRUE	TRUE	TRUE	FALSE	TRUE	TRUE	FALSE	FALSE	TRUE	FALSE	9
AT2G02870	FALSE	TRUE	TRUE	TRUE	FALSE	TRUE	TRUE	FALSE	TRUE	FALSE	FALSE	TRUE	FALSE	TRUE	TRUE	FALSE	9
AT2G03340	FALSE	FALSE	TRUE	TRUE	FALSE	TRUE	TRUE	FALSE	TRUE	FALSE	TRUE	TRUE	FALSE	TRUE	TRUE	FALSE	9
AT2G16440	FALSE	TRUE	TRUE	FALSE	TRUE	TRUE	TRUE	FALSE	FALSE	TRUE	TRUE	TRUE	FALSE	TRUE	FALSE	FALSE	9
AT2G17110	FALSE	TRUE	FALSE	FALSE	TRUE	FALSE	TRUE	TRUE	TRUE	TRUE	TRUE	TRUE	FALSE	TRUE	FALSE	FALSE	9
AT2G20310	FALSE	TRUE	FALSE	TRUE	TRUE	TRUE	TRUE	FALSE	FALSE	TRUE	FALSE	TRUE	TRUE	FALSE	TRUE	FALSE	9
AT2G20580	FALSE	FALSE	TRUE	TRUE	TRUE	FALSE	TRUE	FALSE	FALSE	TRUE	FALSE	TRUE	TRUE	TRUE	FALSE	TRUE	9
AT2G25180	FALSE	FALSE	TRUE	TRUE	TRUE	FALSE	TRUE	FALSE	FALSE	TRUE	FALSE	TRUE	TRUE	FALSE	TRUE	TRUE	9
AT2G26060	FALSE	TRUE	FALSE	TRUE	TRUE	TRUE	TRUE	FALSE	TRUE	TRUE	TRUE	FALSE	FALSE	FALSE	TRUE	FALSE	9
AT2G27020	FALSE	TRUE	TRUE	FALSE	FALSE	TRUE	TRUE	FALSE	TRUE	FALSE	TRUE	TRUE	TRUE	TRUE	FALSE	FALSE	9
AT2G27880	FALSE	FALSE	TRUE	TRUE	TRUE	TRUE	TRUE	FALSE	TRUE	TRUE	TRUE	FALSE	FALSE	FALSE	TRUE	FALSE	9
AT2G28070	FALSE	FALSE	TRUE	TRUE	TRUE	FALSE	TRUE	FALSE	TRUE	TRUE	TRUE	TRUE	TRUE	FALSE	FALSE	FALSE	9
AT2G28305	FALSE	FALSE	FALSE	FALSE	TRUE	TRUE	TRUE	FALSE	TRUE	TRUE	TRUE	FALSE	FALSE	TRUE	TRUE	TRUE	9
AT2G28605	FALSE	TRUE	FALSE	TRUE	FALSE	TRUE	TRUE	FALSE	TRUE	FALSE	TRUE	TRUE	FALSE	TRUE	TRUE	FALSE	9
AT2G28840	FALSE	FALSE	TRUE	TRUE	FALSE	TRUE	TRUE	FALSE	TRUE	FALSE	TRUE	TRUE	FALSE	TRUE	TRUE	FALSE	9
AT2G29100	FALSE	FALSE	TRUE	TRUE	TRUE	TRUE	TRUE	FALSE	TRUE	TRUE	TRUE	FALSE	FALSE	FALSE	TRUE	FALSE	9
AT2G30980	FALSE	TRUE	FALSE	TRUE	TRUE	FALSE	FALSE	FALSE	TRUE	TRUE	TRUE	TRUE	TRUE	FALSE	TRUE	FALSE	9
AT2G31210	FALSE	FALSE	TRUE	TRUE	FALSE	TRUE	TRUE	FALSE	TRUE	FALSE	FALSE	TRUE	TRUE	TRUE	TRUE	FALSE	9
AT2G35530	FALSE	FALSE	TRUE	FALSE	TRUE	TRUE	TRUE	FALSE	TRUE	TRUE	TRUE	TRUE	FALSE	TRUE	FALSE	FALSE	9
AT2G36060	FALSE	FALSE	FALSE	FALSE	TRUE	TRUE	TRUE	TRUE	TRUE	TRUE	TRUE	FALSE	FALSE	TRUE	TRUE	FALSE	9
AT2G36620	FALSE	FALSE	TRUE	TRUE	TRUE	TRUE	FALSE	FALSE	TRUE	TRUE	TRUE	FALSE	FALSE	TRUE	FALSE	TRUE	9
AT2G38170	FALSE	TRUE	TRUE	TRUE	TRUE	TRUE	TRUE	FALSE	TRUE	TRUE	TRUE	FALSE	FALSE	FALSE	FALSE	FALSE	9
AT2G38540	FALSE	FALSE	TRUE	TRUE	FALSE	TRUE	TRUE	FALSE	TRUE	FALSE	TRUE	TRUE	FALSE	TRUE	FALSE	TRUE	9
AT2G39050	FALSE	FALSE	FALSE	TRUE	TRUE	TRUE	TRUE	FALSE	FALSE	TRUE	FALSE	FALSE	TRUE	TRUE	TRUE	TRUE	9
AT2G43160	FALSE	TRUE	TRUE	TRUE	FALSE	TRUE	TRUE	FALSE	FALSE	FALSE	TRUE	TRUE	TRUE	TRUE	FALSE	FALSE	9
AT2G43640	FALSE	FALSE	TRUE	TRUE	FALSE	TRUE	TRUE	FALSE	TRUE	FALSE	TRUE	TRUE	TRUE	TRUE	FALSE	FALSE	9
AT2G44610	FALSE	FALSE	TRUE	TRUE	TRUE	TRUE	TRUE	FALSE	TRUE	TRUE	TRUE	TRUE	FALSE	FALSE	FALSE	FALSE	9
AT2G46680	FALSE	FALSE	FALSE	TRUE	FALSE	FALSE	TRUE	FALSE	TRUE	FALSE	TRUE	TRUE	TRUE	TRUE	TRUE	TRUE	9
AT2G46770	FALSE	TRUE	FALSE	TRUE	FALSE	TRUE	TRUE	TRUE	TRUE	FALSE	TRUE	FALSE	FALSE	TRUE	TRUE	FALSE	9
AT2G46890	FALSE	FALSE	TRUE	TRUE	FALSE	TRUE	TRUE	FALSE	TRUE	FALSE	TRUE	TRUE	FALSE	TRUE	TRUE	FALSE	9
AT2G47060	FALSE	FALSE	FALSE	TRUE	TRUE	TRUE	TRUE	FALSE	TRUE	TRUE	FALSE	FALSE	TRUE	TRUE	TRUE	FALSE	9
AT3G01290	FALSE	FALSE	TRUE	FALSE	TRUE	TRUE	TRUE	FALSE	TRUE	TRUE	FALSE	FALSE	FALSE	TRUE	TRUE	TRUE	9
AT3G01660	FALSE	FALSE	TRUE	TRUE	FALSE	TRUE	TRUE	FALSE	TRUE	FALSE	TRUE	TRUE	FALSE	FALSE	TRUE	TRUE	9
AT3G02065	FALSE	TRUE	FALSE	TRUE	FALSE	TRUE	TRUE	FALSE	TRUE	FALSE	TRUE	FALSE	FALSE	TRUE	TRUE	TRUE	9
AT3G04840	FALSE	FALSE	TRUE	TRUE	FALSE	TRUE	TRUE	TRUE	TRUE	FALSE	FALSE	FALSE	FALSE	TRUE	TRUE	TRUE	9
AT3G05590	FALSE	FALSE	TRUE	TRUE	TRUE	FALSE	TRUE	FALSE	TRUE	TRUE	TRUE	TRUE	FALSE	TRUE	FALSE	FALSE	9
AT3G07350	FALSE	FALSE	TRUE	TRUE	FALSE	TRUE	TRUE	TRUE	TRUE	FALSE	TRUE	TRUE	FALSE	FALSE	TRUE	FALSE	9
AT3G07360	FALSE	FALSE	TRUE	TRUE	FALSE	TRUE	FALSE	FALSE	TRUE	FALSE	TRUE	TRUE	TRUE	TRUE	FALSE	TRUE	9
AT3G08680	FALSE	TRUE	TRUE	FALSE	TRUE	TRUE	TRUE	FALSE	TRUE	TRUE	FALSE	TRUE	TRUE	FALSE	FALSE	FALSE	9
AT3G09630	FALSE	TRUE	TRUE	FALSE	TRUE	TRUE	FALSE	FALSE	TRUE	TRUE	TRUE	TRUE	FALSE	TRUE	FALSE	FALSE	9
AT3G11030	FALSE	TRUE	FALSE	FALSE	TRUE	FALSE	FALSE	TRUE	TRUE	TRUE	TRUE	TRUE	FALSE	TRUE	FALSE	TRUE	9
AT3G11940	FALSE	FALSE	FALSE	TRUE	TRUE	TRUE	TRUE	FALSE	FALSE	TRUE	TRUE	TRUE	TRUE	TRUE	FALSE	FALSE	9
AT3G12380	FALSE	TRUE	TRUE	TRUE	FALSE	TRUE	FALSE	TRUE	TRUE	FALSE	TRUE	TRUE	FALSE	TRUE	FALSE	FALSE	9
AT3G13224	FALSE	TRUE	TRUE	FALSE	TRUE	TRUE	TRUE	FALSE	FALSE	TRUE	TRUE	FALSE	FALSE	FALSE	TRUE	TRUE	9
AT3G16080	FALSE	FALSE	FALSE	TRUE	TRUE	TRUE	TRUE	FALSE	TRUE	TRUE	TRUE	FALSE	TRUE	TRUE	FALSE	FALSE	9
AT3G18380	FALSE	FALSE	FALSE	TRUE	TRUE	TRUE	TRUE	TRUE	FALSE	TRUE	TRUE	TRUE	FALSE	FALSE	TRUE	FALSE	9
AT3G18990	FALSE	TRUE	TRUE	TRUE	TRUE	TRUE	FALSE	FALSE	FALSE	TRUE	FALSE	FALSE	TRUE	TRUE	TRUE	FALSE	9
AT3G19460	FALSE	FALSE	TRUE	TRUE	FALSE	TRUE	TRUE	FALSE	TRUE	FALSE	FALSE	TRUE	TRUE	TRUE	TRUE	FALSE	9
AT3G19800	FALSE	TRUE	TRUE	FALSE	TRUE	TRUE	TRUE	FALSE	TRUE	TRUE	FALSE	FALSE	FALSE	TRUE	TRUE	FALSE	9
AT3G20320	FALSE	TRUE	FALSE	FALSE	FALSE	TRUE	TRUE	TRUE	FALSE	FALSE	TRUE	TRUE	TRUE	TRUE	TRUE	FALSE	9
AT3G23410	FALSE	FALSE	FALSE	TRUE	FALSE	TRUE	TRUE	TRUE	TRUE	FALSE	TRUE	TRUE	FALSE	TRUE	TRUE	FALSE	9
AT3G23600	FALSE	FALSE	TRUE	TRUE	TRUE	TRUE	TRUE	FALSE	TRUE	TRUE	FALSE	TRUE	TRUE	FALSE	FALSE	FALSE	9
AT3G24010	FALSE	TRUE	FALSE	TRUE	TRUE	FALSE	FALSE	FALSE	TRUE	TRUE	TRUE	TRUE	FALSE	FALSE	TRUE	TRUE	9
AT3G26710	FALSE	FALSE	TRUE	FALSE	FALSE	TRUE	TRUE	TRUE	TRUE	FALSE	TRUE	TRUE	FALSE	TRUE	TRUE	FALSE	9
AT3G26900	FALSE	FALSE	TRUE	TRUE	FALSE	TRUE	TRUE	TRUE	FALSE	FALSE	TRUE	TRUE	TRUE	FALSE	TRUE	FALSE	9
AT3G27180	FALSE	FALSE	TRUE	TRUE	TRUE	TRUE	FALSE	FALSE	FALSE	TRUE	TRUE	TRUE	TRUE	FALSE	TRUE	FALSE	9
AT3G27220	FALSE	FALSE	TRUE	TRUE	TRUE	FALSE	TRUE	FALSE	TRUE	TRUE	TRUE	FALSE	FALSE	TRUE	TRUE	FALSE	9
AT3G28040	FALSE	FALSE	TRUE	TRUE	FALSE	TRUE	TRUE	FALSE	TRUE	FALSE	TRUE	TRUE	TRUE	TRUE	FALSE	FALSE	9
AT3G29270	FALSE	FALSE	TRUE	TRUE	FALSE	FALSE	TRUE	TRUE	TRUE	FALSE	TRUE	TRUE	FALSE	TRUE	TRUE	FALSE	9
AT3G32930	FALSE	FALSE	FALSE	TRUE	TRUE	TRUE	FALSE	TRUE	TRUE	TRUE	TRUE	TRUE	FALSE	TRUE	FALSE	FALSE	9
AT3G47890	FALSE	FALSE	TRUE	FALSE	FALSE	TRUE	TRUE	TRUE	TRUE	FALSE	TRUE	TRUE	FALSE	TRUE	TRUE	FALSE	9
AT3G49910	FALSE	TRUE	TRUE	TRUE	FALSE	TRUE	TRUE	FALSE	TRUE	FALSE	TRUE	TRUE	FALSE	FALSE	TRUE	FALSE	9
AT3G51510	FALSE	TRUE	TRUE	FALSE	FALSE	TRUE	TRUE	FALSE	TRUE	FALSE	TRUE	TRUE	TRUE	FALSE	FALSE	TRUE	9
AT3G52155	FALSE	FALSE	TRUE	TRUE	TRUE	TRUE	TRUE	FALSE	TRUE	TRUE	TRUE	FALSE	TRUE	FALSE	FALSE	FALSE	9
AT3G55770	FALSE	FALSE	FALSE	FALSE	TRUE	TRUE	TRUE	TRUE	TRUE	TRUE	TRUE	TRUE	FALSE	FALSE	TRUE	FALSE	9
AT3G58970	FALSE	FALSE	TRUE	TRUE	FALSE	TRUE	TRUE	FALSE	TRUE	FALSE	TRUE	TRUE	TRUE	TRUE	FALSE	FALSE	9
AT3G60590	FALSE	FALSE	TRUE	FALSE	FALSE	TRUE	TRUE	FALSE	TRUE	FALSE	TRUE	TRUE	TRUE	TRUE	TRUE	FALSE	9
AT3G60660	FALSE	FALSE	TRUE	TRUE	FALSE	TRUE	TRUE	FALSE	TRUE	FALSE	TRUE	FALSE	FALSE	TRUE	TRUE	TRUE	9
AT3G62600	FALSE	TRUE	TRUE	FALSE	FALSE	FALSE	TRUE	FALSE	TRUE	FALSE	TRUE	TRUE	TRUE	TRUE	TRUE	FALSE	9
AT4G00340	FALSE	TRUE	FALSE	TRUE	FALSE	TRUE	TRUE	TRUE	TRUE	FALSE	TRUE	TRUE	FALSE	FALSE	TRUE	FALSE	9
AT4G01026	FALSE	TRUE	FALSE	TRUE	FALSE	FALSE	TRUE	FALSE	TRUE	FALSE	TRUE	TRUE	TRUE	TRUE	FALSE	TRUE	9
AT4G02820	FALSE	FALSE	FALSE	TRUE	TRUE	TRUE	FALSE	FALSE	FALSE	TRUE	TRUE	TRUE	FALSE	TRUE	TRUE	TRUE	9
AT4G03600	FALSE	TRUE	TRUE	TRUE	TRUE	TRUE	FALSE	FALSE	FALSE	TRUE	TRUE	TRUE	TRUE	FALSE	FALSE	FALSE	9
AT4G04450	FALSE	FALSE	TRUE	TRUE	FALSE	TRUE	TRUE	TRUE	TRUE	FALSE	TRUE	TRUE	FALSE	TRUE	FALSE	FALSE	9
AT4G05320	FALSE	FALSE	TRUE	TRUE	TRUE	TRUE	TRUE	TRUE	TRUE	TRUE	TRUE	FALSE	FALSE	FALSE	FALSE	FALSE	9
AT4G07950	FALSE	FALSE	FALSE	FALSE	TRUE	TRUE	TRUE	FALSE	TRUE	TRUE	TRUE	FALSE	TRUE	TRUE	TRUE	FALSE	9
AT4G17750	FALSE	TRUE	FALSE	FALSE	FALSE	TRUE	TRUE	TRUE	TRUE	FALSE	TRUE	TRUE	FALSE	TRUE	TRUE	FALSE	9
AT4G20910	FALSE	TRUE	FALSE	TRUE	TRUE	TRUE	TRUE	FALSE	TRUE	TRUE	FALSE	FALSE	FALSE	TRUE	TRUE	FALSE	9
AT4G21120	FALSE	TRUE	TRUE	TRUE	TRUE	TRUE	FALSE	FALSE	TRUE	TRUE	TRUE	TRUE	FALSE	FALSE	FALSE	FALSE	9
AT4G22910	FALSE	FALSE	TRUE	TRUE	FALSE	TRUE	TRUE	FALSE	TRUE	FALSE	TRUE	TRUE	FALSE	TRUE	TRUE	FALSE	9
AT4G23290	FALSE	TRUE	FALSE	FALSE	FALSE	TRUE	TRUE	TRUE	TRUE	FALSE	TRUE	TRUE	FALSE	TRUE	TRUE	FALSE	9
AT4G25360	FALSE	TRUE	FALSE	TRUE	TRUE	TRUE	FALSE	FALSE	TRUE	TRUE	FALSE	TRUE	TRUE	FALSE	TRUE	FALSE	9
AT4G25610	FALSE	TRUE	FALSE	FALSE	FALSE	TRUE	TRUE	TRUE	TRUE	FALSE	TRUE	TRUE	FALSE	FALSE	TRUE	TRUE	9
AT4G27680	FALSE	FALSE	TRUE	TRUE	FALSE	TRUE	TRUE	FALSE	TRUE	FALSE	FALSE	TRUE	TRUE	TRUE	TRUE	FALSE	9
AT4G30220	FALSE	FALSE	FALSE	TRUE	FALSE	TRUE	TRUE	TRUE	TRUE	FALSE	TRUE	TRUE	TRUE	TRUE	FALSE	FALSE	9
AT4G30360	FALSE	FALSE	TRUE	TRUE	FALSE	TRUE	TRUE	TRUE	TRUE	FALSE	TRUE	TRUE	FALSE	TRUE	FALSE	FALSE	9
AT4G30780	FALSE	TRUE	TRUE	TRUE	FALSE	TRUE	TRUE	FALSE	TRUE	FALSE	FALSE	TRUE	FALSE	TRUE	TRUE	FALSE	9
AT4G31420	FALSE	TRUE	TRUE	FALSE	FALSE	TRUE	TRUE	TRUE	TRUE	FALSE	FALSE	TRUE	FALSE	TRUE	TRUE	FALSE	9
AT4G32070	FALSE	TRUE	FALSE	FALSE	TRUE	TRUE	TRUE	FALSE	FALSE	TRUE	TRUE	TRUE	TRUE	FALSE	TRUE	FALSE	9
AT4G32600	FALSE	TRUE	TRUE	FALSE	FALSE	TRUE	TRUE	TRUE	FALSE	FALSE	TRUE	TRUE	FALSE	FALSE	TRUE	TRUE	9
AT4G33350	FALSE	TRUE	TRUE	FALSE	FALSE	TRUE	TRUE	FALSE	TRUE	FALSE	TRUE	TRUE	FALSE	TRUE	TRUE	FALSE	9
AT4G34660	FALSE	FALSE	FALSE	FALSE	TRUE	TRUE	TRUE	TRUE	FALSE	TRUE	TRUE	TRUE	TRUE	TRUE	FALSE	FALSE	9
AT4G35420	FALSE	FALSE	FALSE	TRUE	FALSE	TRUE	TRUE	TRUE	TRUE	FALSE	TRUE	TRUE	FALSE	TRUE	TRUE	FALSE	9
AT4G35760	FALSE	FALSE	TRUE	FALSE	TRUE	TRUE	TRUE	FALSE	TRUE	TRUE	TRUE	TRUE	TRUE	FALSE	FALSE	FALSE	9
AT4G36760	FALSE	FALSE	FALSE	TRUE	FALSE	TRUE	TRUE	TRUE	TRUE	FALSE	TRUE	FALSE	TRUE	TRUE	TRUE	FALSE	9
AT4G36910	FALSE	FALSE	FALSE	TRUE	FALSE	TRUE	TRUE	TRUE	TRUE	FALSE	TRUE	TRUE	TRUE	FALSE	TRUE	FALSE	9
AT4G37850	FALSE	TRUE	TRUE	FALSE	TRUE	FALSE	FALSE	TRUE	TRUE	TRUE	TRUE	TRUE	FALSE	TRUE	FALSE	FALSE	9
AT4G37880	FALSE	FALSE	TRUE	TRUE	FALSE	TRUE	TRUE	TRUE	TRUE	FALSE	FALSE	FALSE	FALSE	TRUE	TRUE	TRUE	9
AT4G38830	FALSE	FALSE	TRUE	TRUE	FALSE	TRUE	TRUE	FALSE	TRUE	FALSE	TRUE	TRUE	FALSE	TRUE	TRUE	FALSE	9
AT5G01260	FALSE	FALSE	TRUE	FALSE	FALSE	TRUE	TRUE	FALSE	TRUE	FALSE	TRUE	TRUE	FALSE	TRUE	TRUE	TRUE	9
AT5G01840	FALSE	TRUE	TRUE	FALSE	TRUE	TRUE	FALSE	FALSE	TRUE	TRUE	TRUE	FALSE	FALSE	FALSE	TRUE	TRUE	9
AT5G02620	FALSE	FALSE	TRUE	TRUE	TRUE	FALSE	TRUE	TRUE	FALSE	TRUE	TRUE	TRUE	FALSE	FALSE	TRUE	FALSE	9
AT5G03970	FALSE	FALSE	TRUE	TRUE	TRUE	FALSE	TRUE	FALSE	TRUE	TRUE	TRUE	TRUE	FALSE	FALSE	TRUE	FALSE	9
AT5G04840	FALSE	FALSE	TRUE	TRUE	TRUE	FALSE	FALSE	TRUE	TRUE	TRUE	FALSE	TRUE	FALSE	TRUE	TRUE	FALSE	9
AT5G05440	FALSE	TRUE	FALSE	TRUE	FALSE	TRUE	FALSE	TRUE	TRUE	FALSE	TRUE	FALSE	TRUE	TRUE	FALSE	TRUE	9
AT5G06510	FALSE	FALSE	TRUE	TRUE	TRUE	TRUE	TRUE	FALSE	TRUE	TRUE	FALSE	FALSE	TRUE	FALSE	TRUE	FALSE	9
AT5G06710	FALSE	TRUE	TRUE	TRUE	FALSE	FALSE	FALSE	TRUE	TRUE	FALSE	FALSE	TRUE	TRUE	TRUE	TRUE	FALSE	9
AT5G06770	FALSE	FALSE	FALSE	TRUE	FALSE	TRUE	TRUE	TRUE	TRUE	FALSE	FALSE	TRUE	TRUE	TRUE	TRUE	FALSE	9
AT5G06970	FALSE	FALSE	FALSE	FALSE	TRUE	FALSE	TRUE	TRUE	TRUE	TRUE	TRUE	TRUE	FALSE	TRUE	TRUE	FALSE	9
AT5G07280	FALSE	TRUE	TRUE	FALSE	FALSE	TRUE	TRUE	FALSE	TRUE	FALSE	TRUE	TRUE	FALSE	TRUE	TRUE	FALSE	9
AT5G08650	TRUE	FALSE	FALSE	FALSE	TRUE	TRUE	FALSE	FALSE	TRUE	TRUE	TRUE	TRUE	TRUE	FALSE	TRUE	FALSE	9
AT5G09860	FALSE	TRUE	FALSE	TRUE	FALSE	TRUE	TRUE	FALSE	TRUE	FALSE	TRUE	TRUE	FALSE	TRUE	TRUE	FALSE	9
AT5G10860	FALSE	FALSE	FALSE	TRUE	TRUE	TRUE	TRUE	FALSE	TRUE	TRUE	TRUE	TRUE	TRUE	FALSE	FALSE	FALSE	9
AT5G11650	FALSE	FALSE	TRUE	TRUE	FALSE	TRUE	TRUE	TRUE	TRUE	FALSE	FALSE	TRUE	TRUE	FALSE	TRUE	FALSE	9
AT5G12860	FALSE	FALSE	TRUE	TRUE	TRUE	TRUE	FALSE	FALSE	FALSE	TRUE	TRUE	TRUE	FALSE	TRUE	TRUE	FALSE	9
AT5G16620	FALSE	FALSE	TRUE	FALSE	FALSE	TRUE	TRUE	TRUE	TRUE	FALSE	TRUE	TRUE	FALSE	TRUE	TRUE	FALSE	9
AT5G17170	FALSE	FALSE	TRUE	TRUE	TRUE	TRUE	TRUE	FALSE	TRUE	TRUE	TRUE	TRUE	FALSE	FALSE	FALSE	FALSE	9
AT5G18810	FALSE	TRUE	TRUE	TRUE	FALSE	TRUE	TRUE	FALSE	TRUE	FALSE	FALSE	TRUE	TRUE	FALSE	TRUE	FALSE	9
AT5G19280	FALSE	TRUE	FALSE	TRUE	TRUE	TRUE	TRUE	FALSE	FALSE	TRUE	FALSE	TRUE	TRUE	FALSE	TRUE	FALSE	9
AT5G20720	FALSE	TRUE	TRUE	TRUE	FALSE	TRUE	FALSE	FALSE	TRUE	FALSE	TRUE	TRUE	FALSE	TRUE	TRUE	FALSE	9
AT5G22360	FALSE	TRUE	FALSE	TRUE	TRUE	TRUE	FALSE	FALSE	TRUE	TRUE	TRUE	TRUE	FALSE	TRUE	FALSE	FALSE	9
AT5G24010	FALSE	FALSE	TRUE	TRUE	FALSE	TRUE	TRUE	TRUE	TRUE	FALSE	TRUE	FALSE	TRUE	TRUE	FALSE	FALSE	9
AT5G24270	FALSE	FALSE	FALSE	TRUE	TRUE	TRUE	TRUE	FALSE	FALSE	TRUE	FALSE	FALSE	TRUE	TRUE	TRUE	TRUE	9
AT5G24930	FALSE	TRUE	TRUE	TRUE	FALSE	FALSE	TRUE	TRUE	TRUE	FALSE	TRUE	TRUE	FALSE	TRUE	FALSE	FALSE	9
AT5G26740	FALSE	TRUE	FALSE	TRUE	FALSE	TRUE	TRUE	FALSE	TRUE	FALSE	TRUE	TRUE	FALSE	TRUE	TRUE	FALSE	9
AT5G27060	FALSE	TRUE	FALSE	FALSE	TRUE	TRUE	FALSE	FALSE	TRUE	TRUE	TRUE	TRUE	TRUE	FALSE	TRUE	FALSE	9
AT5G27370	TRUE	TRUE	FALSE	FALSE	TRUE	TRUE	TRUE	FALSE	FALSE	TRUE	FALSE	TRUE	FALSE	TRUE	TRUE	FALSE	9
AT5G27700	FALSE	TRUE	TRUE	FALSE	FALSE	TRUE	TRUE	TRUE	TRUE	FALSE	TRUE	FALSE	FALSE	TRUE	TRUE	FALSE	9
AT5G27860	FALSE	TRUE	TRUE	TRUE	TRUE	FALSE	FALSE	FALSE	TRUE	TRUE	FALSE	TRUE	TRUE	TRUE	FALSE	FALSE	9
AT5G28290	FALSE	TRUE	FALSE	TRUE	FALSE	TRUE	TRUE	FALSE	TRUE	FALSE	TRUE	TRUE	TRUE	FALSE	TRUE	FALSE	9
AT5G42070	FALSE	TRUE	TRUE	TRUE	FALSE	TRUE	TRUE	TRUE	FALSE	FALSE	TRUE	TRUE	FALSE	FALSE	FALSE	TRUE	9
AT5G42470	FALSE	FALSE	TRUE	TRUE	FALSE	TRUE	TRUE	TRUE	TRUE	FALSE	TRUE	FALSE	TRUE	FALSE	FALSE	TRUE	9
AT5G44310	FALSE	FALSE	TRUE	FALSE	TRUE	TRUE	TRUE	FALSE	TRUE	TRUE	TRUE	TRUE	TRUE	FALSE	FALSE	FALSE	9
AT5G49040	FALSE	FALSE	FALSE	TRUE	TRUE	TRUE	TRUE	FALSE	TRUE	TRUE	TRUE	TRUE	FALSE	FALSE	TRUE	FALSE	9
AT5G49400	FALSE	TRUE	TRUE	TRUE	FALSE	TRUE	TRUE	FALSE	FALSE	FALSE	TRUE	TRUE	FALSE	TRUE	FALSE	TRUE	9
AT5G51200	FALSE	TRUE	TRUE	TRUE	TRUE	FALSE	TRUE	FALSE	TRUE	TRUE	FALSE	FALSE	TRUE	FALSE	TRUE	FALSE	9
AT5G53530	FALSE	FALSE	TRUE	TRUE	FALSE	FALSE	TRUE	FALSE	TRUE	FALSE	TRUE	TRUE	TRUE	TRUE	TRUE	FALSE	9
AT5G53560	FALSE	TRUE	TRUE	TRUE	FALSE	TRUE	TRUE	FALSE	FALSE	FALSE	FALSE	TRUE	TRUE	TRUE	TRUE	FALSE	9
AT5G56840	FALSE	FALSE	TRUE	FALSE	FALSE	TRUE	TRUE	FALSE	TRUE	FALSE	TRUE	TRUE	TRUE	TRUE	FALSE	TRUE	9
AT5G57110	FALSE	TRUE	FALSE	TRUE	TRUE	TRUE	FALSE	FALSE	TRUE	TRUE	TRUE	FALSE	FALSE	TRUE	FALSE	TRUE	9
AT5G57560	FALSE	TRUE	TRUE	TRUE	FALSE	TRUE	TRUE	TRUE	TRUE	FALSE	FALSE	TRUE	TRUE	FALSE	FALSE	FALSE	9
AT5G57660	FALSE	TRUE	FALSE	FALSE	FALSE	TRUE	TRUE	FALSE	TRUE	FALSE	TRUE	TRUE	FALSE	TRUE	TRUE	TRUE	9
AT5G58170	FALSE	TRUE	TRUE	TRUE	FALSE	FALSE	TRUE	FALSE	TRUE	FALSE	TRUE	TRUE	TRUE	TRUE	FALSE	FALSE	9
AT5G59140	FALSE	FALSE	TRUE	TRUE	TRUE	FALSE	TRUE	FALSE	TRUE	TRUE	TRUE	TRUE	FALSE	TRUE	FALSE	FALSE	9
AT5G61220	FALSE	TRUE	TRUE	FALSE	TRUE	TRUE	TRUE	FALSE	TRUE	TRUE	FALSE	TRUE	FALSE	TRUE	FALSE	FALSE	9
AT5G62130	FALSE	TRUE	FALSE	TRUE	FALSE	TRUE	TRUE	FALSE	TRUE	FALSE	TRUE	TRUE	FALSE	TRUE	TRUE	FALSE	9
AT5G64170	FALSE	FALSE	TRUE	TRUE	TRUE	TRUE	TRUE	FALSE	TRUE	TRUE	TRUE	TRUE	FALSE	FALSE	FALSE	FALSE	9
AT5G65260	FALSE	FALSE	TRUE	TRUE	TRUE	TRUE	FALSE	FALSE	TRUE	TRUE	TRUE	FALSE	TRUE	FALSE	FALSE	TRUE	9
AT5G66380	FALSE	TRUE	TRUE	TRUE	FALSE	FALSE	TRUE	TRUE	TRUE	FALSE	FALSE	TRUE	FALSE	TRUE	TRUE	FALSE	9
AT5G67360	FALSE	FALSE	FALSE	TRUE	FALSE	TRUE	TRUE	TRUE	TRUE	FALSE	TRUE	TRUE	FALSE	TRUE	TRUE	FALSE	9
BRL1	FALSE	TRUE	FALSE	TRUE	TRUE	TRUE	TRUE	FALSE	TRUE	TRUE	FALSE	TRUE	FALSE	FALSE	TRUE	FALSE	9
BRX	FALSE	FALSE	TRUE	FALSE	TRUE	TRUE	TRUE	FALSE	TRUE	TRUE	TRUE	TRUE	FALSE	TRUE	FALSE	FALSE	9
BSK1	FALSE	FALSE	FALSE	TRUE	TRUE	TRUE	FALSE	TRUE	TRUE	TRUE	TRUE	FALSE	TRUE	TRUE	FALSE	FALSE	9
C79B2	FALSE	FALSE	TRUE	TRUE	FALSE	TRUE	TRUE	FALSE	TRUE	FALSE	TRUE	TRUE	FALSE	TRUE	TRUE	FALSE	9
CAF1I	FALSE	FALSE	TRUE	TRUE	TRUE	TRUE	TRUE	FALSE	FALSE	TRUE	TRUE	TRUE	FALSE	FALSE	TRUE	FALSE	9
CESA7	FALSE	FALSE	FALSE	TRUE	FALSE	TRUE	TRUE	FALSE	TRUE	FALSE	TRUE	TRUE	FALSE	TRUE	TRUE	TRUE	9
CIPK3	FALSE	FALSE	FALSE	TRUE	TRUE	TRUE	TRUE	FALSE	TRUE	TRUE	TRUE	FALSE	FALSE	TRUE	TRUE	FALSE	9
DCAF1	FALSE	FALSE	FALSE	FALSE	TRUE	TRUE	FALSE	TRUE	TRUE	TRUE	TRUE	TRUE	FALSE	TRUE	FALSE	TRUE	9
DRM1L	FALSE	FALSE	FALSE	FALSE	TRUE	TRUE	TRUE	FALSE	TRUE	TRUE	TRUE	TRUE	FALSE	TRUE	TRUE	FALSE	9
EBF2	FALSE	FALSE	TRUE	TRUE	TRUE	FALSE	FALSE	FALSE	TRUE	TRUE	TRUE	TRUE	TRUE	FALSE	FALSE	TRUE	9
ETFQO	FALSE	TRUE	TRUE	FALSE	TRUE	TRUE	TRUE	FALSE	TRUE	TRUE	FALSE	TRUE	FALSE	FALSE	TRUE	FALSE	9
ETR1	FALSE	TRUE	TRUE	TRUE	TRUE	TRUE	TRUE	FALSE	TRUE	TRUE	TRUE	FALSE	FALSE	FALSE	FALSE	FALSE	9
F4I336	FALSE	TRUE	FALSE	TRUE	TRUE	FALSE	FALSE	TRUE	TRUE	TRUE	FALSE	TRUE	FALSE	TRUE	TRUE	FALSE	9
GEM	FALSE	FALSE	FALSE	TRUE	TRUE	TRUE	TRUE	FALSE	TRUE	TRUE	FALSE	TRUE	TRUE	FALSE	TRUE	FALSE	9
GGAP1	FALSE	TRUE	TRUE	TRUE	FALSE	TRUE	TRUE	FALSE	TRUE	FALSE	TRUE	TRUE	FALSE	TRUE	FALSE	FALSE	9
GLPK	FALSE	FALSE	TRUE	TRUE	TRUE	TRUE	FALSE	FALSE	TRUE	TRUE	TRUE	TRUE	FALSE	TRUE	FALSE	FALSE	9
GSO1	FALSE	FALSE	TRUE	TRUE	TRUE	TRUE	TRUE	FALSE	TRUE	TRUE	TRUE	TRUE	FALSE	FALSE	FALSE	FALSE	9
HAT4	FALSE	FALSE	TRUE	TRUE	FALSE	TRUE	TRUE	FALSE	TRUE	FALSE	TRUE	FALSE	TRUE	TRUE	TRUE	FALSE	9
HEN4	FALSE	TRUE	TRUE	TRUE	FALSE	TRUE	TRUE	FALSE	TRUE	FALSE	TRUE	TRUE	FALSE	FALSE	TRUE	FALSE	9
HSA32	FALSE	TRUE	FALSE	FALSE	TRUE	TRUE	TRUE	FALSE	TRUE	TRUE	FALSE	TRUE	TRUE	FALSE	TRUE	FALSE	9
IAA17	FALSE	FALSE	FALSE	TRUE	TRUE	TRUE	TRUE	FALSE	TRUE	TRUE	FALSE	TRUE	FALSE	TRUE	TRUE	FALSE	9
IAA8	FALSE	FALSE	TRUE	TRUE	TRUE	TRUE	TRUE	FALSE	FALSE	TRUE	TRUE	TRUE	TRUE	FALSE	FALSE	FALSE	9
ICR1	FALSE	TRUE	FALSE	TRUE	FALSE	TRUE	TRUE	FALSE	TRUE	FALSE	TRUE	TRUE	FALSE	TRUE	TRUE	FALSE	9
KAN1	FALSE	TRUE	TRUE	TRUE	FALSE	TRUE	TRUE	TRUE	TRUE	FALSE	TRUE	FALSE	FALSE	FALSE	TRUE	FALSE	9
LAMP1	FALSE	TRUE	TRUE	TRUE	FALSE	FALSE	TRUE	FALSE	TRUE	FALSE	TRUE	TRUE	FALSE	TRUE	TRUE	FALSE	9
LSD1	FALSE	TRUE	TRUE	TRUE	TRUE	TRUE	FALSE	FALSE	FALSE	TRUE	FALSE	TRUE	FALSE	TRUE	TRUE	FALSE	9
MOS1	FALSE	TRUE	TRUE	TRUE	FALSE	TRUE	FALSE	TRUE	TRUE	FALSE	FALSE	TRUE	TRUE	TRUE	FALSE	FALSE	9
NCED3	FALSE	FALSE	FALSE	FALSE	TRUE	TRUE	TRUE	TRUE	TRUE	TRUE	TRUE	TRUE	FALSE	FALSE	TRUE	FALSE	9
NFYA7	FALSE	TRUE	TRUE	FALSE	TRUE	TRUE	FALSE	FALSE	TRUE	TRUE	TRUE	TRUE	FALSE	FALSE	TRUE	FALSE	9
NIK1	FALSE	FALSE	TRUE	FALSE	FALSE	TRUE	FALSE	TRUE	FALSE	FALSE	TRUE	TRUE	TRUE	TRUE	TRUE	TRUE	9
NPR4	FALSE	TRUE	TRUE	FALSE	FALSE	TRUE	TRUE	FALSE	TRUE	FALSE	TRUE	TRUE	FALSE	TRUE	TRUE	FALSE	9
NRPD2	FALSE	TRUE	FALSE	TRUE	FALSE	TRUE	TRUE	FALSE	TRUE	FALSE	TRUE	TRUE	TRUE	FALSE	TRUE	FALSE	9
P2C38	FALSE	FALSE	TRUE	FALSE	FALSE	TRUE	FALSE	TRUE	TRUE	FALSE	TRUE	TRUE	FALSE	TRUE	TRUE	TRUE	9
PCO2	FALSE	TRUE	TRUE	FALSE	FALSE	TRUE	TRUE	FALSE	TRUE	FALSE	TRUE	TRUE	TRUE	FALSE	TRUE	FALSE	9
PHOT1	FALSE	TRUE	FALSE	TRUE	TRUE	TRUE	FALSE	TRUE	TRUE	TRUE	FALSE	FALSE	TRUE	TRUE	FALSE	FALSE	9
PIE1	FALSE	FALSE	TRUE	TRUE	FALSE	TRUE	TRUE	FALSE	TRUE	FALSE	TRUE	TRUE	TRUE	TRUE	FALSE	FALSE	9
PSKR2	FALSE	FALSE	TRUE	TRUE	FALSE	TRUE	TRUE	TRUE	TRUE	FALSE	TRUE	TRUE	FALSE	TRUE	FALSE	FALSE	9
PSL4	FALSE	FALSE	TRUE	TRUE	FALSE	TRUE	FALSE	FALSE	TRUE	FALSE	TRUE	TRUE	TRUE	TRUE	TRUE	FALSE	9
R00005	FALSE	FALSE	FALSE	TRUE	FALSE	TRUE	TRUE	TRUE	TRUE	FALSE	TRUE	TRUE	FALSE	TRUE	TRUE	FALSE	9
RAF2A	FALSE	TRUE	FALSE	TRUE	FALSE	TRUE	TRUE	FALSE	TRUE	FALSE	TRUE	FALSE	TRUE	TRUE	TRUE	FALSE	9
RH2	FALSE	FALSE	TRUE	TRUE	TRUE	FALSE	FALSE	FALSE	TRUE	TRUE	TRUE	TRUE	FALSE	TRUE	TRUE	FALSE	9
RIP	FALSE	TRUE	FALSE	TRUE	FALSE	TRUE	TRUE	FALSE	TRUE	FALSE	TRUE	TRUE	TRUE	TRUE	FALSE	FALSE	9
RIP4	FALSE	FALSE	TRUE	TRUE	TRUE	FALSE	TRUE	FALSE	TRUE	TRUE	TRUE	TRUE	FALSE	FALSE	TRUE	FALSE	9
RSZ33	FALSE	FALSE	TRUE	TRUE	FALSE	TRUE	TRUE	FALSE	TRUE	FALSE	TRUE	TRUE	FALSE	TRUE	FALSE	TRUE	9
RUB1	FALSE	TRUE	TRUE	TRUE	FALSE	TRUE	TRUE	FALSE	TRUE	FALSE	TRUE	TRUE	FALSE	FALSE	TRUE	FALSE	9
SECE1	FALSE	FALSE	FALSE	TRUE	TRUE	FALSE	TRUE	FALSE	TRUE	TRUE	TRUE	TRUE	TRUE	FALSE	TRUE	FALSE	9
SPA1	FALSE	FALSE	FALSE	TRUE	TRUE	TRUE	FALSE	FALSE	FALSE	TRUE	TRUE	TRUE	TRUE	TRUE	TRUE	FALSE	9
SRF5	FALSE	TRUE	FALSE	TRUE	FALSE	TRUE	TRUE	FALSE	FALSE	FALSE	TRUE	TRUE	TRUE	TRUE	TRUE	FALSE	9
STKLU	FALSE	FALSE	TRUE	TRUE	TRUE	TRUE	TRUE	FALSE	TRUE	TRUE	TRUE	TRUE	FALSE	FALSE	FALSE	FALSE	9
TCP15	FALSE	TRUE	TRUE	TRUE	FALSE	TRUE	TRUE	FALSE	TRUE	FALSE	TRUE	FALSE	FALSE	TRUE	TRUE	FALSE	9
THF1	FALSE	FALSE	TRUE	TRUE	TRUE	TRUE	FALSE	FALSE	TRUE	TRUE	TRUE	FALSE	TRUE	FALSE	TRUE	FALSE	9
TIF6B	FALSE	FALSE	TRUE	FALSE	TRUE	TRUE	TRUE	TRUE	FALSE	TRUE	FALSE	TRUE	TRUE	TRUE	FALSE	FALSE	9
TOR	FALSE	FALSE	FALSE	TRUE	TRUE	TRUE	TRUE	FALSE	TRUE	TRUE	FALSE	TRUE	FALSE	TRUE	TRUE	FALSE	9
TTG1	FALSE	TRUE	FALSE	TRUE	TRUE	FALSE	FALSE	FALSE	TRUE	TRUE	TRUE	TRUE	TRUE	TRUE	FALSE	FALSE	9
VDAC3	FALSE	FALSE	FALSE	TRUE	TRUE	TRUE	TRUE	FALSE	TRUE	TRUE	FALSE	TRUE	TRUE	FALSE	TRUE	FALSE	9
VIP3	FALSE	TRUE	TRUE	TRUE	TRUE	TRUE	TRUE	FALSE	TRUE	TRUE	FALSE	FALSE	FALSE	FALSE	TRUE	FALSE	9
WRK53	FALSE	FALSE	TRUE	FALSE	TRUE	TRUE	FALSE	FALSE	TRUE	TRUE	TRUE	TRUE	TRUE	TRUE	FALSE	FALSE	9
YAB1	FALSE	TRUE	FALSE	TRUE	FALSE	TRUE	FALSE	TRUE	TRUE	FALSE	TRUE	TRUE	FALSE	TRUE	FALSE	TRUE	9
AGO7	FALSE	FALSE	TRUE	FALSE	FALSE	TRUE	TRUE	FALSE	TRUE	FALSE	TRUE	TRUE	FALSE	TRUE	TRUE	FALSE	8
1.1.1.100	FALSE	FALSE	FALSE	TRUE	TRUE	TRUE	TRUE	FALSE	TRUE	TRUE	FALSE	TRUE	FALSE	FALSE	TRUE	FALSE	8
1.1.1.157	FALSE	FALSE	FALSE	TRUE	TRUE	TRUE	TRUE	FALSE	TRUE	TRUE	TRUE	TRUE	FALSE	FALSE	FALSE	FALSE	8
1.1.1.22	FALSE	TRUE	TRUE	FALSE	FALSE	TRUE	TRUE	FALSE	FALSE	FALSE	TRUE	TRUE	FALSE	TRUE	TRUE	FALSE	8
1.1.1.288	FALSE	TRUE	FALSE	TRUE	FALSE	TRUE	TRUE	TRUE	FALSE	FALSE	TRUE	FALSE	TRUE	TRUE	FALSE	FALSE	8
1.1.1.34	FALSE	FALSE	TRUE	TRUE	FALSE	FALSE	TRUE	TRUE	TRUE	FALSE	FALSE	TRUE	TRUE	FALSE	TRUE	FALSE	8
1.1.1.49	FALSE	TRUE	TRUE	TRUE	FALSE	TRUE	TRUE	FALSE	TRUE	FALSE	FALSE	TRUE	FALSE	TRUE	FALSE	FALSE	8
1.1.1.65	FALSE	TRUE	TRUE	TRUE	FALSE	TRUE	FALSE	FALSE	TRUE	FALSE	FALSE	FALSE	FALSE	TRUE	TRUE	TRUE	8
1.14.11.15	FALSE	TRUE	FALSE	TRUE	FALSE	TRUE	TRUE	FALSE	TRUE	FALSE	FALSE	TRUE	FALSE	FALSE	TRUE	TRUE	8
1.14.11.2	FALSE	FALSE	TRUE	TRUE	FALSE	TRUE	TRUE	FALSE	FALSE	FALSE	TRUE	TRUE	TRUE	FALSE	TRUE	FALSE	8
1.14.14.154	FALSE	FALSE	FALSE	FALSE	FALSE	TRUE	TRUE	TRUE	TRUE	FALSE	TRUE	TRUE	TRUE	FALSE	TRUE	FALSE	8
1.2.1.13	FALSE	TRUE	TRUE	TRUE	FALSE	TRUE	TRUE	FALSE	TRUE	FALSE	TRUE	FALSE	FALSE	TRUE	FALSE	FALSE	8
1.2.1.24	FALSE	TRUE	TRUE	TRUE	TRUE	FALSE	TRUE	TRUE	FALSE	TRUE	FALSE	FALSE	TRUE	FALSE	FALSE	FALSE	8
1.3.3.4	FALSE	FALSE	TRUE	TRUE	TRUE	FALSE	FALSE	FALSE	TRUE	TRUE	TRUE	TRUE	FALSE	FALSE	TRUE	FALSE	8
1.4.4.2	FALSE	FALSE	FALSE	TRUE	TRUE	TRUE	TRUE	TRUE	TRUE	TRUE	TRUE	FALSE	FALSE	FALSE	FALSE	FALSE	8
2.2.1.2	FALSE	FALSE	FALSE	TRUE	TRUE	FALSE	TRUE	FALSE	TRUE	TRUE	TRUE	TRUE	FALSE	FALSE	TRUE	FALSE	8
2.2.1.7	FALSE	TRUE	FALSE	TRUE	FALSE	FALSE	TRUE	TRUE	TRUE	FALSE	TRUE	FALSE	FALSE	TRUE	TRUE	FALSE	8
2.3.1.9	FALSE	FALSE	FALSE	TRUE	TRUE	TRUE	TRUE	FALSE	TRUE	TRUE	TRUE	TRUE	FALSE	FALSE	FALSE	FALSE	8
2.4.1.1	FALSE	FALSE	FALSE	TRUE	FALSE	TRUE	TRUE	FALSE	TRUE	FALSE	TRUE	TRUE	TRUE	FALSE	TRUE	FALSE	8
2.5.1.117	FALSE	TRUE	TRUE	TRUE	FALSE	TRUE	TRUE	FALSE	TRUE	FALSE	TRUE	TRUE	FALSE	FALSE	FALSE	FALSE	8
2.5.1.19	FALSE	TRUE	FALSE	FALSE	TRUE	TRUE	TRUE	FALSE	FALSE	TRUE	FALSE	TRUE	TRUE	TRUE	FALSE	FALSE	8
2.5.1.74	FALSE	FALSE	TRUE	FALSE	TRUE	FALSE	FALSE	FALSE	TRUE	TRUE	TRUE	TRUE	TRUE	TRUE	FALSE	FALSE	8
2.6.1.42	FALSE	TRUE	FALSE	TRUE	FALSE	TRUE	TRUE	FALSE	TRUE	FALSE	FALSE	TRUE	TRUE	FALSE	TRUE	FALSE	8
2.7.1.17	FALSE	TRUE	FALSE	TRUE	TRUE	FALSE	TRUE	FALSE	TRUE	TRUE	TRUE	TRUE	FALSE	FALSE	FALSE	FALSE	8
2.7.1.21	FALSE	TRUE	TRUE	TRUE	FALSE	TRUE	TRUE	FALSE	FALSE	FALSE	FALSE	TRUE	TRUE	FALSE	TRUE	FALSE	8
2.7.1.26	FALSE	FALSE	FALSE	TRUE	TRUE	TRUE	TRUE	FALSE	TRUE	TRUE	TRUE	TRUE	FALSE	FALSE	FALSE	FALSE	8
2.7.1.47	FALSE	FALSE	FALSE	FALSE	TRUE	TRUE	FALSE	FALSE	TRUE	TRUE	TRUE	TRUE	FALSE	TRUE	TRUE	FALSE	8
2.7.4.8	FALSE	TRUE	FALSE	FALSE	FALSE	TRUE	TRUE	FALSE	TRUE	FALSE	TRUE	FALSE	TRUE	TRUE	TRUE	FALSE	8
2.7.7.14	FALSE	FALSE	FALSE	TRUE	TRUE	FALSE	TRUE	FALSE	TRUE	TRUE	TRUE	TRUE	TRUE	FALSE	FALSE	FALSE	8
3.1.1.3	FALSE	FALSE	FALSE	TRUE	TRUE	FALSE	TRUE	FALSE	TRUE	TRUE	TRUE	TRUE	TRUE	FALSE	FALSE	FALSE	8
3.2.2.3	FALSE	FALSE	TRUE	FALSE	FALSE	TRUE	TRUE	TRUE	TRUE	FALSE	TRUE	FALSE	FALSE	TRUE	TRUE	FALSE	8
3.5.1.10	FALSE	TRUE	FALSE	TRUE	FALSE	TRUE	TRUE	TRUE	TRUE	FALSE	TRUE	FALSE	FALSE	TRUE	FALSE	FALSE	8
3.5.2.2	FALSE	FALSE	FALSE	TRUE	TRUE	FALSE	FALSE	FALSE	TRUE	TRUE	TRUE	FALSE	TRUE	FALSE	TRUE	TRUE	8
4.1.1.19	FALSE	FALSE	TRUE	FALSE	TRUE	FALSE	FALSE	TRUE	TRUE	TRUE	TRUE	TRUE	FALSE	TRUE	FALSE	FALSE	8
4.2.1.10	FALSE	FALSE	FALSE	TRUE	FALSE	TRUE	TRUE	TRUE	TRUE	FALSE	TRUE	FALSE	TRUE	FALSE	TRUE	FALSE	8
4.2.1.128	FALSE	FALSE	FALSE	TRUE	TRUE	TRUE	FALSE	TRUE	FALSE	TRUE	TRUE	FALSE	FALSE	FALSE	TRUE	TRUE	8
4.3.2.9	FALSE	TRUE	TRUE	FALSE	FALSE	TRUE	FALSE	TRUE	FALSE	FALSE	FALSE	TRUE	TRUE	TRUE	TRUE	FALSE	8
5.3.3.2	FALSE	FALSE	TRUE	TRUE	TRUE	FALSE	TRUE	FALSE	TRUE	TRUE	FALSE	TRUE	TRUE	FALSE	FALSE	FALSE	8
5.4.4.2	FALSE	TRUE	TRUE	TRUE	FALSE	TRUE	TRUE	FALSE	TRUE	FALSE	TRUE	TRUE	FALSE	FALSE	FALSE	FALSE	8
6.1.1.1	FALSE	TRUE	FALSE	TRUE	FALSE	TRUE	TRUE	FALSE	FALSE	FALSE	TRUE	TRUE	TRUE	TRUE	FALSE	FALSE	8
6.1.1.16	FALSE	TRUE	TRUE	TRUE	TRUE	FALSE	FALSE	FALSE	TRUE	TRUE	TRUE	TRUE	FALSE	FALSE	FALSE	FALSE	8
6.1.1.9	FALSE	FALSE	FALSE	TRUE	FALSE	TRUE	TRUE	TRUE	TRUE	FALSE	TRUE	TRUE	FALSE	FALSE	TRUE	FALSE	8
6.3.5.4	FALSE	FALSE	TRUE	TRUE	FALSE	TRUE	FALSE	FALSE	TRUE	FALSE	TRUE	TRUE	TRUE	TRUE	FALSE	FALSE	8
ABIL1	FALSE	TRUE	FALSE	TRUE	TRUE	TRUE	TRUE	FALSE	TRUE	TRUE	FALSE	FALSE	FALSE	FALSE	TRUE	FALSE	8
AFR	FALSE	TRUE	TRUE	TRUE	TRUE	FALSE	FALSE	FALSE	TRUE	TRUE	TRUE	FALSE	FALSE	FALSE	TRUE	FALSE	8
ARR11	FALSE	FALSE	TRUE	TRUE	TRUE	FALSE	TRUE	FALSE	FALSE	TRUE	FALSE	TRUE	TRUE	FALSE	TRUE	FALSE	8
ARR4	FALSE	FALSE	TRUE	TRUE	FALSE	TRUE	TRUE	FALSE	TRUE	FALSE	TRUE	TRUE	FALSE	TRUE	FALSE	FALSE	8
ASHH2	FALSE	FALSE	TRUE	TRUE	TRUE	TRUE	TRUE	FALSE	FALSE	TRUE	TRUE	TRUE	FALSE	FALSE	FALSE	FALSE	8
AT1G01200	FALSE	FALSE	TRUE	TRUE	FALSE	TRUE	FALSE	FALSE	TRUE	FALSE	TRUE	TRUE	FALSE	TRUE	TRUE	FALSE	8
AT1G03780	FALSE	FALSE	TRUE	FALSE	FALSE	TRUE	TRUE	FALSE	TRUE	FALSE	TRUE	FALSE	TRUE	TRUE	TRUE	FALSE	8
AT1G03840	FALSE	TRUE	TRUE	FALSE	FALSE	TRUE	TRUE	FALSE	TRUE	FALSE	TRUE	TRUE	FALSE	FALSE	TRUE	FALSE	8
AT1G05700	FALSE	FALSE	TRUE	TRUE	TRUE	FALSE	TRUE	FALSE	FALSE	TRUE	TRUE	TRUE	TRUE	FALSE	FALSE	FALSE	8
AT1G06110	FALSE	FALSE	FALSE	TRUE	FALSE	TRUE	TRUE	TRUE	FALSE	FALSE	TRUE	TRUE	FALSE	TRUE	TRUE	FALSE	8
AT1G06510	FALSE	TRUE	TRUE	TRUE	TRUE	TRUE	TRUE	FALSE	TRUE	TRUE	FALSE	FALSE	FALSE	FALSE	FALSE	FALSE	8
AT1G07310	FALSE	TRUE	FALSE	TRUE	FALSE	TRUE	TRUE	FALSE	TRUE	FALSE	FALSE	TRUE	FALSE	TRUE	TRUE	FALSE	8
AT1G08230	FALSE	TRUE	FALSE	TRUE	FALSE	TRUE	TRUE	FALSE	TRUE	FALSE	FALSE	TRUE	TRUE	FALSE	TRUE	FALSE	8
AT1G08530	FALSE	FALSE	TRUE	TRUE	FALSE	FALSE	TRUE	TRUE	FALSE	FALSE	TRUE	TRUE	TRUE	FALSE	FALSE	TRUE	8
AT1G11915	FALSE	FALSE	FALSE	TRUE	TRUE	TRUE	TRUE	FALSE	TRUE	TRUE	FALSE	TRUE	FALSE	FALSE	TRUE	FALSE	8
AT1G13600	FALSE	FALSE	TRUE	FALSE	FALSE	TRUE	TRUE	FALSE	TRUE	FALSE	TRUE	TRUE	TRUE	FALSE	TRUE	FALSE	8
AT1G13750	FALSE	TRUE	FALSE	TRUE	FALSE	TRUE	FALSE	TRUE	TRUE	FALSE	TRUE	FALSE	TRUE	TRUE	FALSE	FALSE	8
AT1G14020	FALSE	FALSE	TRUE	TRUE	TRUE	TRUE	TRUE	TRUE	FALSE	TRUE	FALSE	FALSE	FALSE	FALSE	TRUE	FALSE	8
AT1G14830	FALSE	TRUE	FALSE	TRUE	FALSE	TRUE	TRUE	TRUE	FALSE	FALSE	FALSE	TRUE	FALSE	TRUE	TRUE	FALSE	8
AT1G16560	FALSE	FALSE	FALSE	TRUE	FALSE	TRUE	TRUE	TRUE	TRUE	FALSE	FALSE	TRUE	FALSE	TRUE	TRUE	FALSE	8
AT1G21210	FALSE	FALSE	TRUE	FALSE	TRUE	FALSE	FALSE	FALSE	TRUE	TRUE	TRUE	TRUE	TRUE	TRUE	FALSE	FALSE	8
AT1G21890	FALSE	FALSE	TRUE	TRUE	FALSE	TRUE	TRUE	FALSE	TRUE	FALSE	TRUE	TRUE	FALSE	TRUE	FALSE	FALSE	8
AT1G22750	FALSE	FALSE	FALSE	FALSE	TRUE	TRUE	TRUE	TRUE	TRUE	TRUE	TRUE	FALSE	FALSE	FALSE	TRUE	FALSE	8
AT1G22840	FALSE	FALSE	FALSE	TRUE	FALSE	TRUE	TRUE	FALSE	FALSE	FALSE	TRUE	TRUE	FALSE	TRUE	TRUE	TRUE	8
AT1G22970	FALSE	FALSE	TRUE	FALSE	TRUE	TRUE	FALSE	FALSE	TRUE	TRUE	FALSE	TRUE	FALSE	TRUE	TRUE	FALSE	8
AT1G23260	FALSE	FALSE	FALSE	TRUE	FALSE	TRUE	TRUE	FALSE	TRUE	FALSE	TRUE	FALSE	TRUE	TRUE	TRUE	FALSE	8
AT1G25550	FALSE	FALSE	FALSE	TRUE	FALSE	TRUE	TRUE	TRUE	TRUE	FALSE	TRUE	TRUE	FALSE	TRUE	FALSE	FALSE	8
AT1G25570	FALSE	FALSE	FALSE	FALSE	TRUE	TRUE	FALSE	FALSE	FALSE	TRUE	TRUE	TRUE	TRUE	TRUE	TRUE	FALSE	8
AT1G26850	FALSE	FALSE	FALSE	FALSE	TRUE	TRUE	TRUE	TRUE	FALSE	TRUE	TRUE	TRUE	TRUE	FALSE	FALSE	FALSE	8
AT1G27700	FALSE	FALSE	TRUE	TRUE	FALSE	FALSE	TRUE	FALSE	TRUE	FALSE	TRUE	TRUE	FALSE	TRUE	TRUE	FALSE	8
AT1G28220	FALSE	TRUE	TRUE	FALSE	FALSE	TRUE	TRUE	FALSE	TRUE	FALSE	TRUE	TRUE	FALSE	TRUE	FALSE	FALSE	8
AT1G28610	FALSE	TRUE	TRUE	TRUE	FALSE	TRUE	TRUE	FALSE	TRUE	FALSE	FALSE	TRUE	FALSE	FALSE	TRUE	FALSE	8
AT1G30320	FALSE	FALSE	FALSE	FALSE	TRUE	TRUE	FALSE	TRUE	TRUE	TRUE	TRUE	TRUE	FALSE	FALSE	TRUE	FALSE	8
AT1G30360	FALSE	TRUE	FALSE	TRUE	FALSE	TRUE	TRUE	FALSE	TRUE	FALSE	TRUE	TRUE	TRUE	FALSE	FALSE	FALSE	8
AT1G30920	FALSE	TRUE	TRUE	FALSE	FALSE	TRUE	FALSE	FALSE	TRUE	FALSE	TRUE	TRUE	FALSE	TRUE	TRUE	FALSE	8
AT1G31420	TRUE	FALSE	FALSE	TRUE	FALSE	TRUE	TRUE	FALSE	TRUE	FALSE	FALSE	TRUE	TRUE	FALSE	TRUE	FALSE	8
AT1G31770	FALSE	FALSE	TRUE	TRUE	FALSE	TRUE	TRUE	TRUE	FALSE	FALSE	FALSE	FALSE	TRUE	TRUE	TRUE	FALSE	8
AT1G47260	FALSE	TRUE	FALSE	FALSE	TRUE	TRUE	TRUE	FALSE	TRUE	TRUE	TRUE	TRUE	FALSE	FALSE	FALSE	FALSE	8
AT1G48450	FALSE	FALSE	TRUE	FALSE	FALSE	TRUE	FALSE	TRUE	TRUE	FALSE	FALSE	TRUE	FALSE	TRUE	TRUE	TRUE	8
AT1G48480	FALSE	FALSE	TRUE	FALSE	FALSE	TRUE	TRUE	FALSE	TRUE	FALSE	TRUE	TRUE	FALSE	TRUE	TRUE	FALSE	8
AT1G51550	FALSE	FALSE	FALSE	FALSE	FALSE	TRUE	TRUE	TRUE	FALSE	FALSE	TRUE	TRUE	FALSE	TRUE	TRUE	TRUE	8
AT1G51805	FALSE	FALSE	FALSE	FALSE	TRUE	TRUE	FALSE	TRUE	TRUE	TRUE	FALSE	TRUE	FALSE	TRUE	TRUE	FALSE	8
AT1G52230	FALSE	TRUE	FALSE	TRUE	FALSE	TRUE	TRUE	TRUE	TRUE	FALSE	FALSE	FALSE	FALSE	TRUE	FALSE	TRUE	8
AT1G55300	FALSE	TRUE	FALSE	TRUE	FALSE	TRUE	TRUE	FALSE	FALSE	FALSE	TRUE	TRUE	TRUE	FALSE	TRUE	FALSE	8
AT1G56290	FALSE	FALSE	TRUE	FALSE	TRUE	FALSE	TRUE	FALSE	FALSE	TRUE	TRUE	TRUE	TRUE	FALSE	TRUE	FALSE	8
AT1G56410	FALSE	FALSE	FALSE	FALSE	FALSE	TRUE	TRUE	TRUE	TRUE	FALSE	FALSE	TRUE	FALSE	TRUE	TRUE	TRUE	8
AT1G58110	FALSE	TRUE	FALSE	TRUE	FALSE	TRUE	TRUE	FALSE	TRUE	FALSE	TRUE	TRUE	FALSE	FALSE	TRUE	FALSE	8
[truncated: 7,316 more rows]

## Sheet: S4
Supplementary Table S4. Gene ontology analysis from the the present study including the terms for Biological Process (BP), Molecular Function (MF) and Cellular Component (CC), represented by the ratio to the total terms (GeneRatio) and their statistical values.
[truncated: 3,464 more rows]

[truncated: 5 more sheets: S5, S6, S7, S8, S9]
